# Supplementary material
Source: PubMed Central journal article supplement (PMC3359144)

## A Diversity-Oriented Synthesis Approach to Macrocycles via Oxidative Ring Expansion

Felix Kopp,<sup>1,2</sup> Christopher F. Stratton,<sup>1,3</sup> Lakshmi B. Akella,<sup>4</sup> and Derek S. Tan<sup>\*,2,3</sup>

<sup>1</sup>*These authors contributed equally to this work.*

<sup>2</sup>*Molecular Pharmacology & Chemistry Program,  
<sup>3</sup>Tri-Institutional Training Program in Chemical Biology,  
and Tri-Institutional Research Program,  
Memorial Sloan–Kettering Cancer Center  
1275 York Avenue, Box 422, New York, New York 10065*

*and*

<sup>4</sup>*Chemical Biology Platform  
Broad Institute of MIT and Harvard  
7 Cambridge Center, Cambridge, MA 02142 USA*

### Supplementary Information

#### I. Supplementary Results

Supplementary Figures 1–7 S3

#### II. Supplementary Methods

|                                                                                    |     |
|------------------------------------------------------------------------------------|-----|
| A. Materials and methods                                                           | S10 |
| B. Synthesis of bis(trimethylsiloxy)dienes ( <b>8</b> , S2)                        | S11 |
| 1. Synthesis of 1,3-diketones ( <b>7</b> )                                         | S11 |
| 2. Synthesis of bis(trimethylsiloxy)dienes ( <b>8</b> , S2)                        | S14 |
| C. Synthesis of dihydropyrones and dihydropyridones ( <b>9</b> , <b>10</b> , S3–6) | S18 |
| 1. Synthesis of dienophiles                                                        | S18 |
| 2. Synthesis of dihydropyrones and dihydropyridones ( <b>9</b> , <b>10</b> , S3–6) | S21 |
| D. Synthesis of TBS-protected alcohols ( <b>13</b> , <b>14</b> , S11–15)           | S29 |
| 1. Diastereoselective reduction of dihydropyrones ( <b>9</b> , S3–6)               | S29 |
| 2. Diastereoselective reduction of dihydropyridones ( <b>10</b> )                  | S34 |
| 3. TBS protection of alcohols ( <b>13</b> , <b>14</b> , S11–15)                    | S36 |
| E. Ring expansion to macrolactones and macrolactams ( <b>15</b> – <b>21</b> )      | S45 |

|                                                                                           |             |
|-------------------------------------------------------------------------------------------|-------------|
| F. Functionalization of macrocyclic scaffolds                                             | <b>S55</b>  |
| 1. Cross-coupling reactions of iodide macrocycle ( <b>19</b> )                            | S55         |
| 2. Diastereoselective reductions of ketone macrocycles ( <b>15</b> )                      | S58         |
| 3. Hydroboration–oxidation and epoxidation of methylenated macrocycle ( <b>23a</b> )      | S67         |
| 4. Deprotection and acylation of TBS-protected alcohol macrocycle ( <b>15a</b> )          | S70         |
| G. Synthesis of related <i>seco</i> -acids ( <b>22a–d</b> , <b>S22</b> )                  | <b>S72</b>  |
| 1. Synthesis of <i>seco</i> -acids ( <b>22a–d</b> )                                       | S72         |
| 2. Synthesis of linear <i>N</i> -nosyl amino acid ( <b>S22</b> )                          | S78         |
| H. Macrocyclization experiments with related <i>seco</i> -acids                           | <b>S83</b>  |
| 1. Macrolactonization of <i>seco</i> -acids ( <b>22a–d</b> ) with the Shiina MNBA reagent | S83         |
| 2. Macrolactamization of <i>N</i> -nosyl amino acid ( <b>S22</b> ) with DCC or HATU       | S84         |
| I. Cheminformatic analysis of macrocycles                                                 | <b>S89</b>  |
| 1. Principal component analysis (PCA)                                                     | S89         |
| 2. Principal moment of inertia (PMI) analysis                                             | S98         |
| J. <sup>1</sup> H-NMR and <sup>13</sup> C-NMR spectra                                     | <b>S100</b> |

## I. Supplementary Results

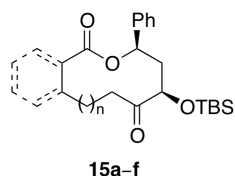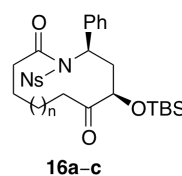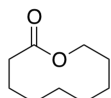

702 results  
mostly fused rings  
**15 actual macrolides**  
0 natural products  
15 library members  
(14 lactones from Amos Smith)

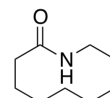

2386 results  
mostly fused rings  
**0 actual macrolactams**  
0 natural products  
0 library members

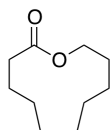

46 results  
mostly fused rings  
**4 actual macrolides**  
0 natural products  
4 library members  
(4 lactones from Amos Smith)

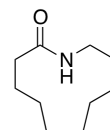

607 results  
mostly fused rings  
**0 actual macrolactams**  
0 natural products  
0 library members

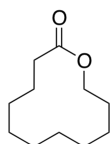

16 results  
mostly fused rings  
**2 actual macrolides**  
0 natural products  
2 library members  
(2 lactones from Amos Smith)

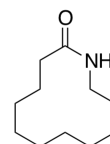

512 results  
mostly fused rings  
**0 actual macrolactams**  
0 natural products  
0 library members

**Supplementary Figure 1. Results of PubChem substructure searches for core scaffolds in the macrocycle library.** Substructure searches of the PubChem database for the core scaffolds of macrolactones **15a-f** and macrolactams **16a-c** were carried out using the substructure search function at <http://pubchem.ncbi.nlm.nih.gov/>. (Select “Chemical structure search”, followed by the “Substructure/Superstructure” tab). SMILES codes were entered for each scaffold to be searched and the results restricted to compounds in the MLSMR (Filters: Data source: From = MLSMR). Search results included non-macrocyclic structures, such as fused ring systems having the same skeletal outline, which were then excluded by manual inspection.

Derived from 15a-f:

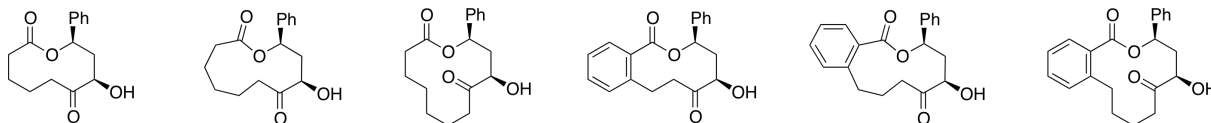

Derived from 16a-c:

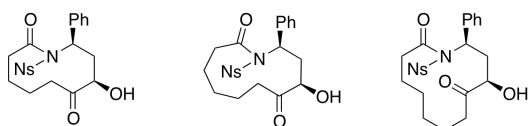

Derived from 17:

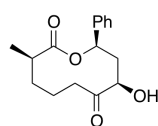

Derived from 18:

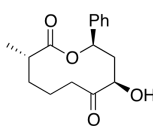

Derived from 19:

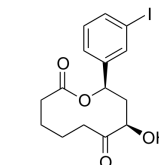

Derived from 20:

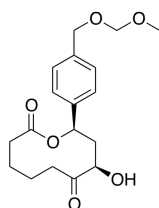

Derived from 21:

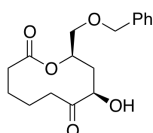

Derived from 23a-d:

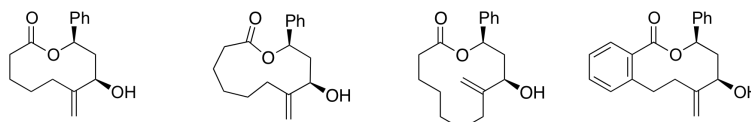

Derived from 24:

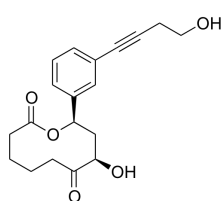

Derived from 25:

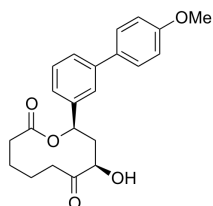

Derived from 27a-f:

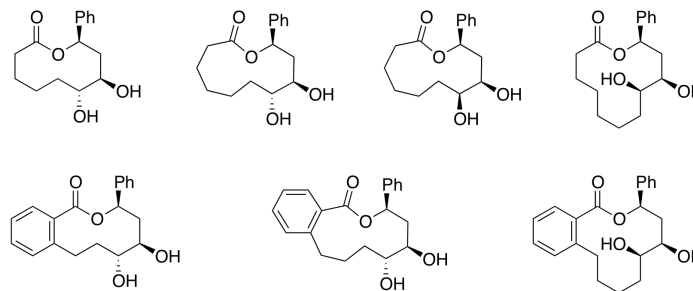

Derived from 26:

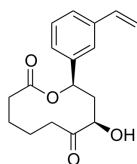

Derived from 28:

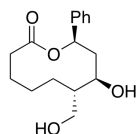

Derived from 29:

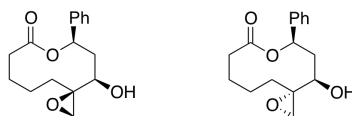

Derived from 31:

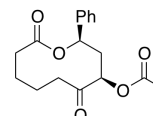

**Supplementary Figure 2. Macrocyclic library used in PCA and PMI analyses.** The 32 structures are derived from 15a-f, 16a-c, 17-21, 23a-d, 24-26, 27a-f, 28, 29, and 31, via *in silico* desilylation as necessary.

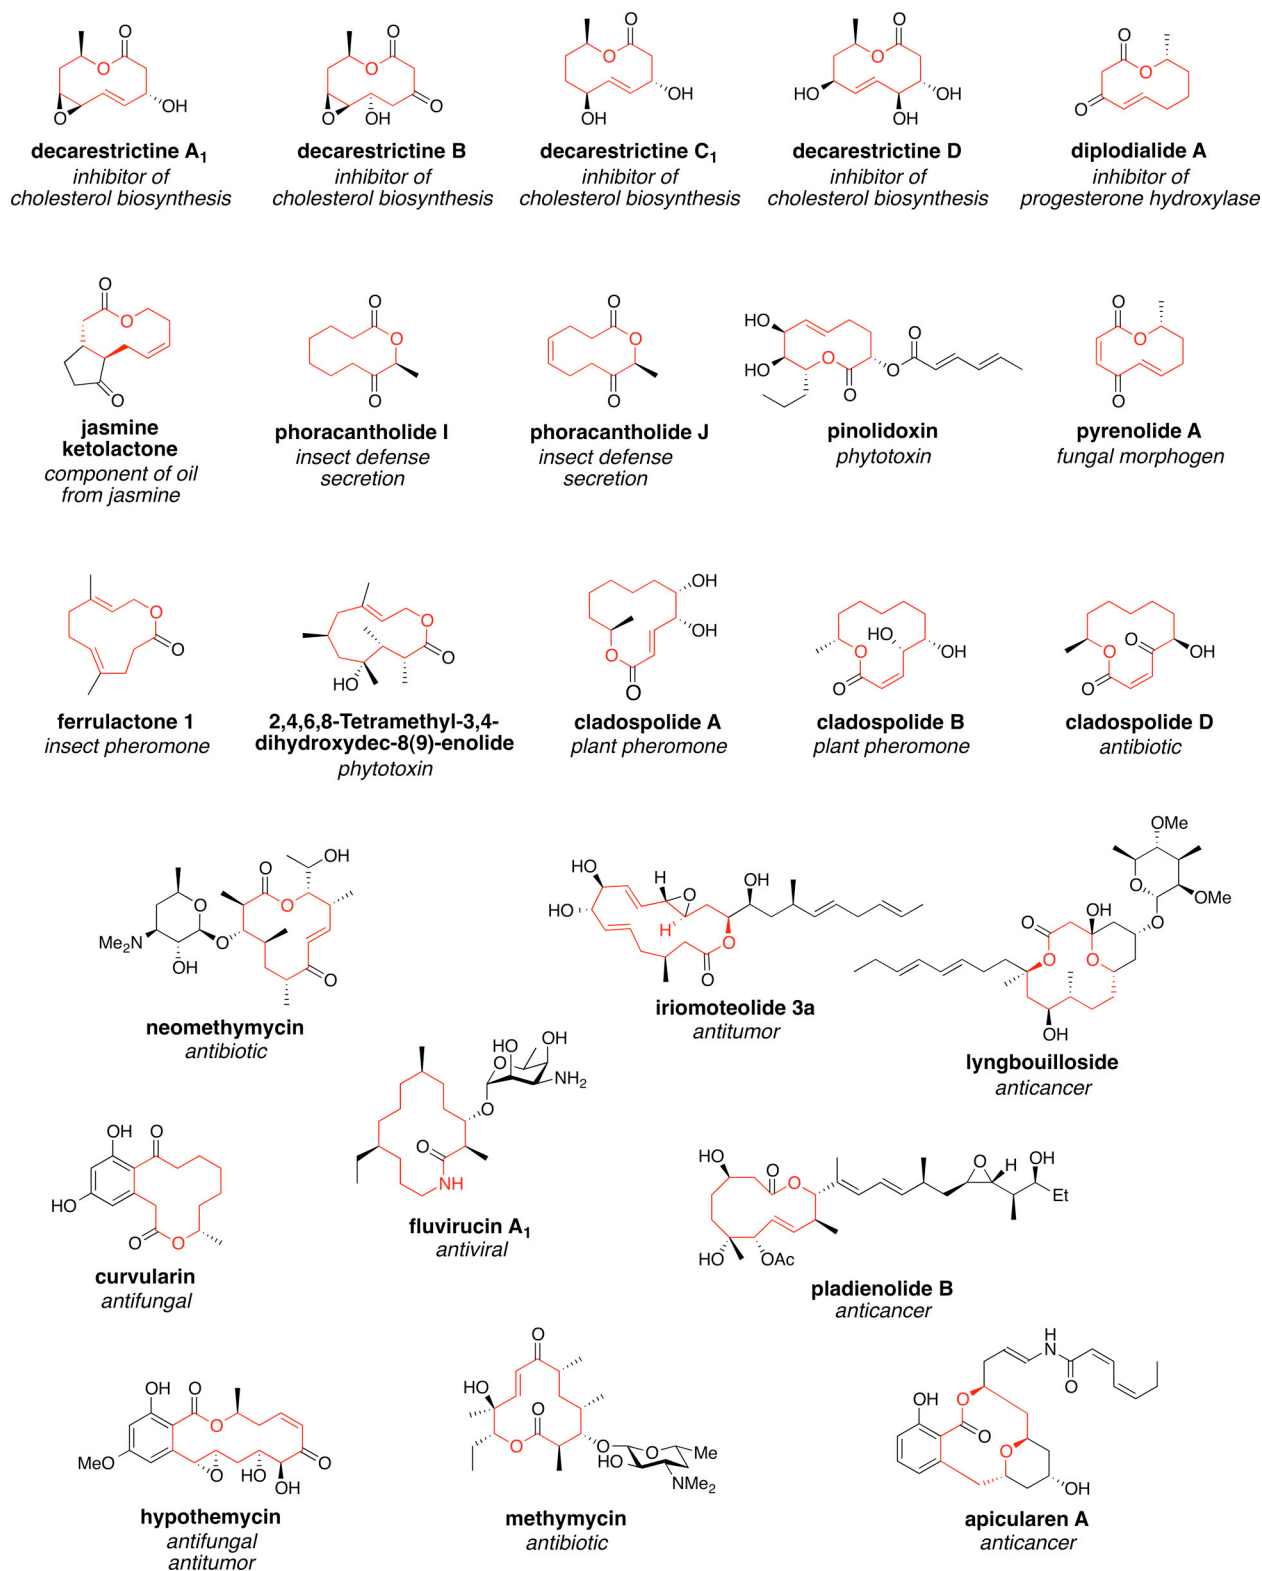

**Supplementary Figure 3. Macrocyclic natural products used in PCA and PMI analyses.** Set of 24 macrocyclic natural products with diverse chemical structures and biological activities.

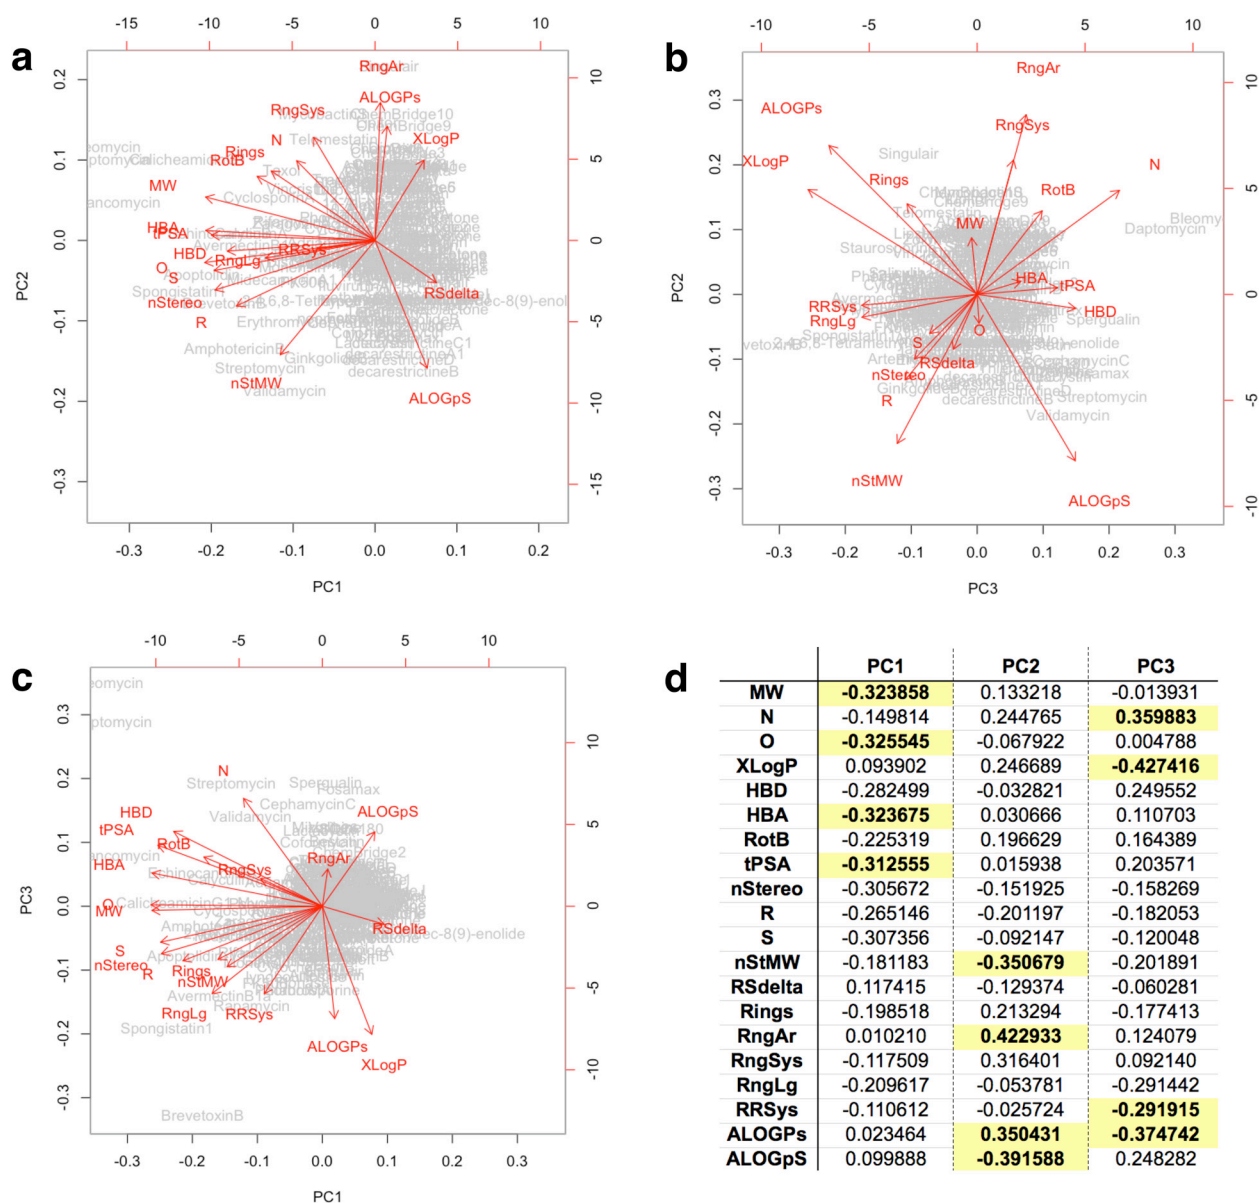

**Supplementary Figure 4. Biplots and component loadings for PCA of macrocycle library with macrocyclic natural products and established reference sets.** The biplots for (a) PC1 vs. PC2, (b) PC3 vs. PC2, and (c) PC1 vs. PC3, and component loadings (d) of the 20 original structural and physicochemical descriptors on the first three principal components indicate the influence of each structural and physicochemical descriptor upon the positioning of compounds in the PCA plots (Fig. 4a–c and Supplementary Fig. 5). The four most influential parameters on each principal component are highlighted (yellow).

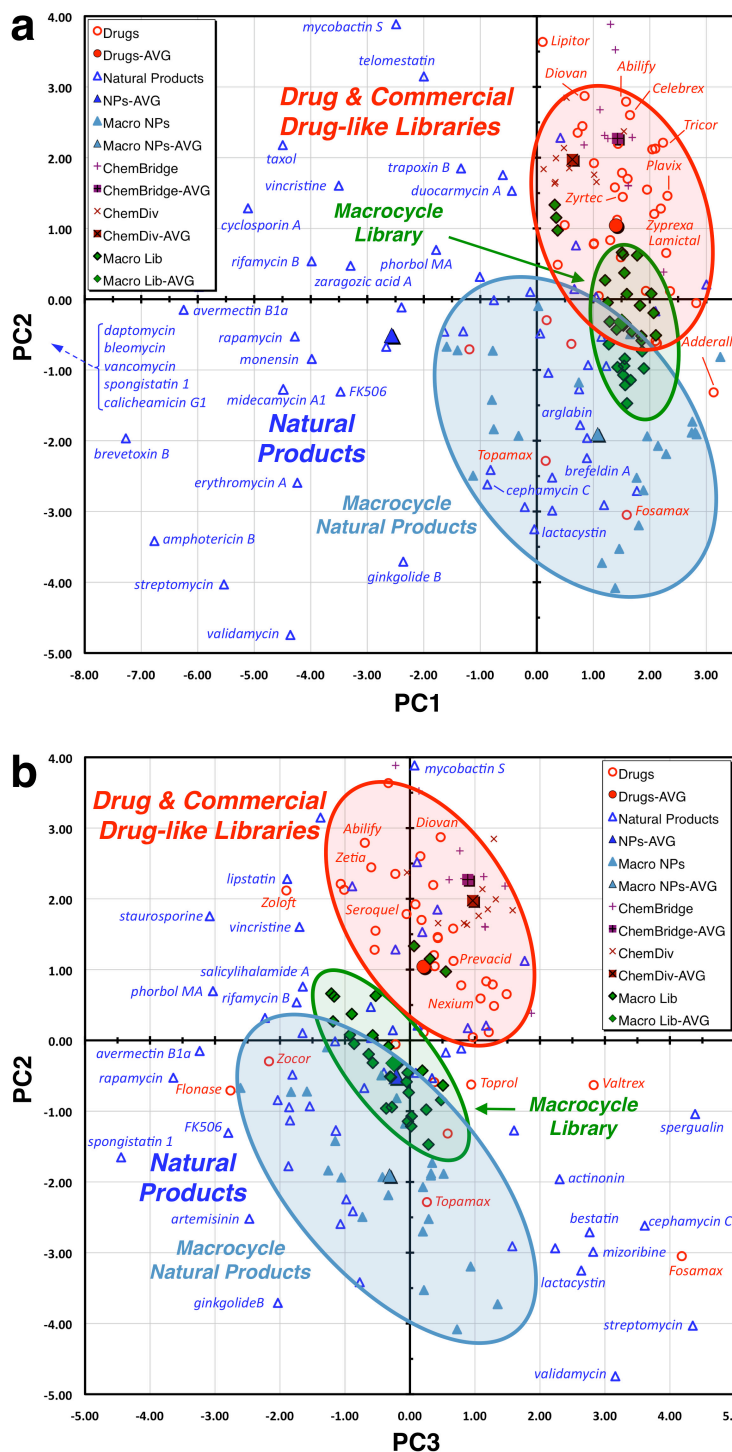

**Supplementary Figure 5. PCA of macrocycle library members with macrocyclic natural products and established reference sets.** PCA of 20 structural and physicochemical parameters was carried out for the 32 macrocycle library members from **Supplementary Fig. 2** (Macro Lib), the 24 macrocyclic natural products from **Supplementary Fig. 3** (Macro NPs), 40 top-selling brand name drugs (Drugs), 60 diverse natural products (Natural Products/NPs), and 20 ChemBridge and ChemDiv drug-like library members. **(a)** Expanded version of PC1 vs. PC2 PCA plot in **Fig. 4a** of the manuscript with representative drug and natural product reference compounds labeled. **(b)** Expanded version of PC3 vs. PC2 PCA plot in **Fig. 4b** of the manuscript. See **Section I** for full details.

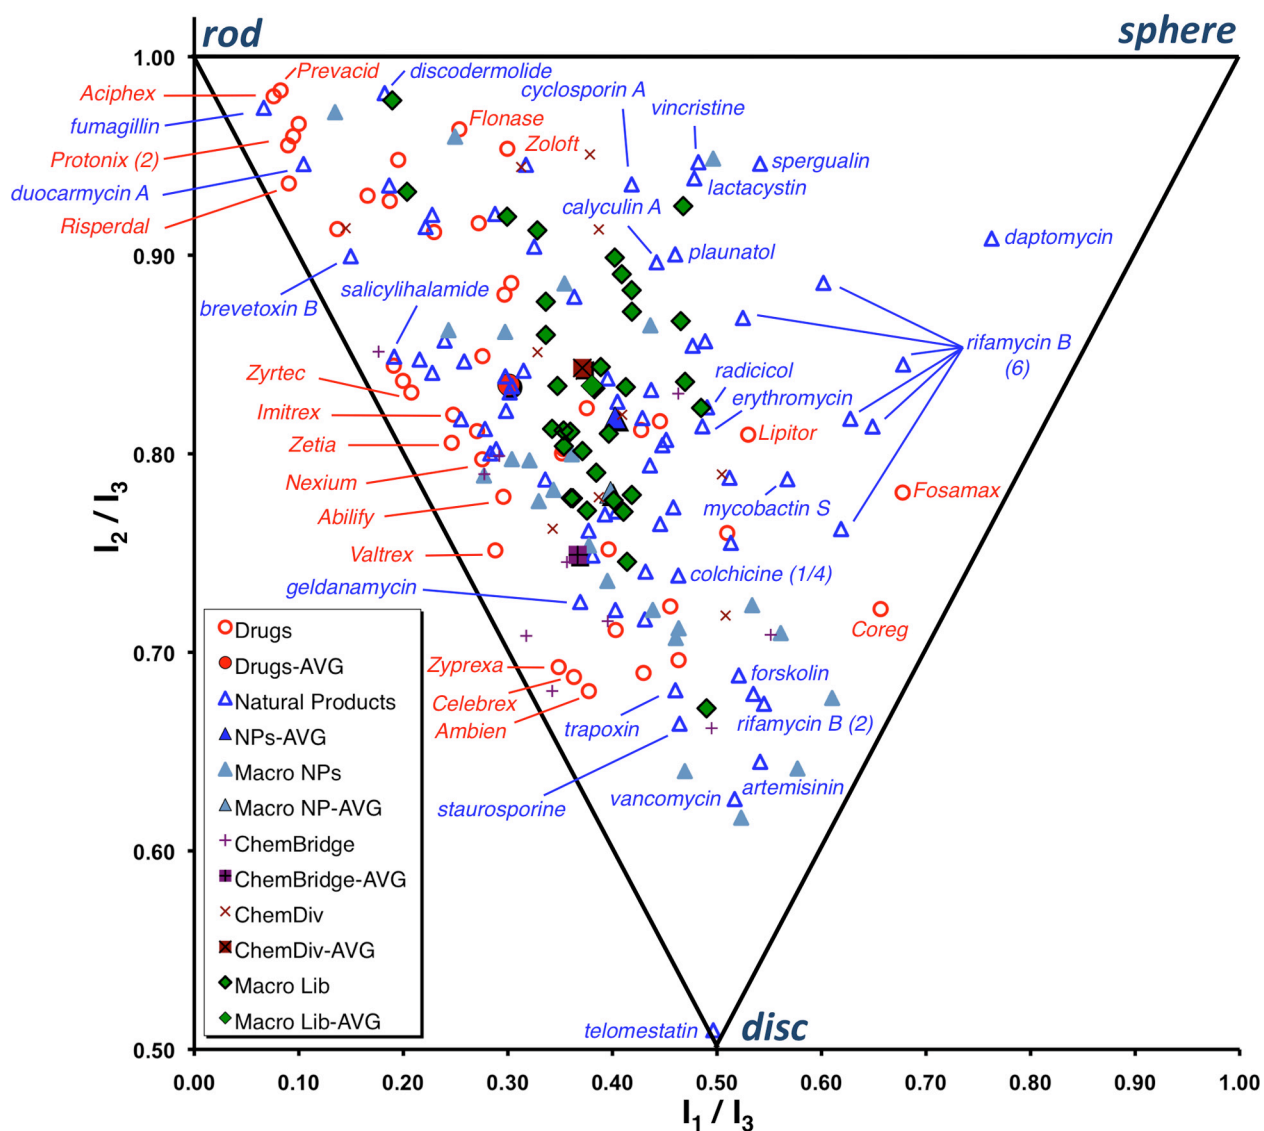

**Supplementary Figure 6. PMI plot of macrocycle library, macrocyclic natural products, and established reference sets.** Expanded version of PMI plot in Fig. 4d of the manuscript showing lowest energy conformations of the 32 macrocycle library members from **Supplementary Fig. 2** (Macro Lib), the 24 macrocyclic natural products from **Supplementary Fig. 3** (Macro NPs), 40 top-selling brand name drugs (Drugs), 60 diverse natural products (Natural Products/NPs), and 20 ChemBridge and ChemDiv drug-like library members. Representative drug and natural product reference compounds labeled. See **Section I** for full details.



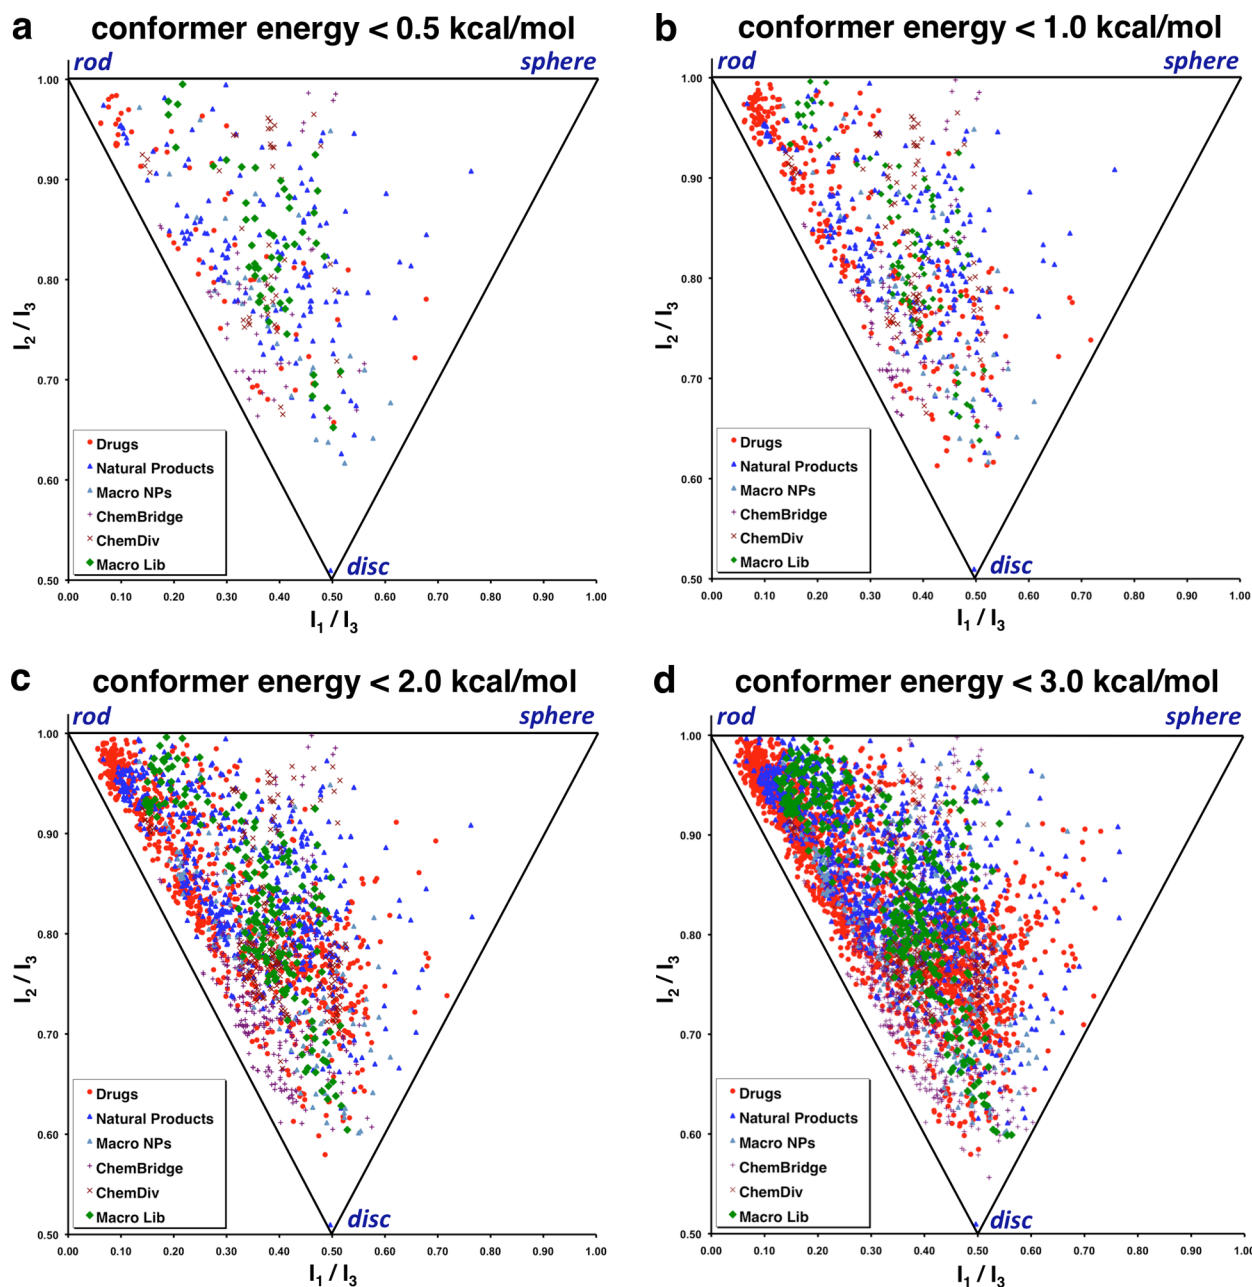

**Supplementary Figure 7. PMI plots of macrocycle library, macrocyclic natural products, and established reference sets displaying conformers at increasing energy level cutoffs.** Conformers are shown for the 32 macrocycle library members from **Supplementary Fig. 2** (Macro Lib), the 24 macrocyclic natural products from **Supplementary Fig. 3** (Macro NPs), 40 top-selling brand name drugs (Drugs), 60 diverse natural products (Natural Products), and 20 ChemBridge and ChemDiv drug-like library members at energy level cutoffs of **(a)** <0.5 kcal/mol, **(b)** <1.0 kcal/mol, **(c)** <2.0 kcal/mol, or **(d)** <3.0 kcal/mol above the lowest energy conformer for each structure (*cf.* **Fig. 4d** of the manuscript). See **Section I** for full details.

## II. Supplementary Methods

### A. MATERIALS AND METHODS

Reagents were obtained from Aldrich Chemical ([www.sigma-aldrich.com](http://www.sigma-aldrich.com)) or Acros Organics ([www.fishersci.com](http://www.fishersci.com)) and used without further purification. Optima grade solvents were obtained from Fisher Scientific ([www.fishersci.com](http://www.fishersci.com)), degassed with Ar, and purified on a solvent drying system as described,<sup>1</sup> unless otherwise indicated. Diisopropylamine (*i*-Pr<sub>2</sub>NH) was obtained from Aldrich in SureSeal bottles. Trimethylchlorosilane was obtained from Acros and used without further purification. Acetyl chloride was dried over P<sub>2</sub>O<sub>5</sub>, distilled under reduced pressure and stored under Ar. Acetic anhydride was obtained from Acros and used without further purification. *n*-Butyllithium was titrated against menthol in the presence of 1,10-phenanthroline as described.<sup>2</sup>

All reactions were performed in flame-dried glassware under positive Ar pressure with magnetic stirring unless otherwise noted. Rubber septa and syringes were used for the transfer of liquid reagents and solutions. Syringes were purged with argon prior to use. Cold baths were generated as follows: 0 °C, wet ice/water; -20 °C, dry ice/carbon tetrachloride monitored with a thermometer; -44 °C, dry ice/CH<sub>3</sub>CN; -63 °C, dry ice/chloroform; -78 °C, dry ice/acetone; -100 °C, dry ice/Et<sub>2</sub>O. Slow additions in macrocyclization reactions were carried out using KD Scientific KDS100 or KDS200 syringe pumps.

TLC was performed on 0.25 mm E. Merck silica gel 60 F254 plates and visualized under UV light (254 nm) or by staining with potassium permanganate (KMnO<sub>4</sub>), cerium ammonium molybdenate (CAM), phosphomolybdic acid (PMA), iodine (I<sub>2</sub>), or *p*-anisaldehyde. Silica flash chromatography was performed on E. Merck 230–400 mesh silica gel 60.

Melting point determinations were performed on a Stanford Research Systems MPA100 OptiMelt Melting Point apparatus and are uncorrected (benzoic acid, lit.: 121.5 °C, found: 117.6–119.9 °C). IR spectra were recorded on a Bruker Optics Tensor 27 FTIR spectrometer with peaks reported in cm<sup>-1</sup>. NMR spectra were recorded on Bruker Avance II 500, Avance II 600, or DRX500 instruments at 24 °C in CDCl<sub>3</sub> unless otherwise indicated. Spectra were processed using Bruker TopSpin or nucleomatica iNMR ([www.inmr.net](http://www.inmr.net)) software, and chemical shifts are expressed in ppm relative to TMS (<sup>1</sup>H, 0 ppm) or solvent signals: CDCl<sub>3</sub> (<sup>1</sup>H, 7.26; <sup>13</sup>C, 77.0 ppm), C<sub>6</sub>D<sub>6</sub> (<sup>1</sup>H, 7.16 ppm; <sup>13</sup>C, 128.0 ppm), toluene-*d*<sub>8</sub> (<sup>1</sup>H, 2.08 ppm; <sup>13</sup>C, 20.4 ppm), or DMSO-*d*<sub>6</sub> (<sup>1</sup>H, 2.50 ppm; <sup>13</sup>C, 39.5); coupling constants are expressed in Hz. Mass spectra were obtained at the MSKCC Analytical Core Facility on a Waters 3100 mass spectrometer by electrospray (ESI) ionization. X-ray crystallographic analysis was carried out at the University of Toledo Instrumentation Center (<http://www.utoledo.edu/nsm/ic/index.html>) on a Siemens Smart CCD System.

---

<sup>1</sup> Pangborn, A. B.; Giardello, M. A.; Grubbs, R. H.; Rosen, R. K.; Timmers, F. J. *Organometallics* **1996**, *15*, 1518.

<sup>2</sup> Lin, H.-S.; Paquette, L. A. *Synth. Commun.* **1994**, *24*, 2503.

**B. SYNTHESIS OF BIS(TRIMETHYLSILOXY)DIENES (8, S2)**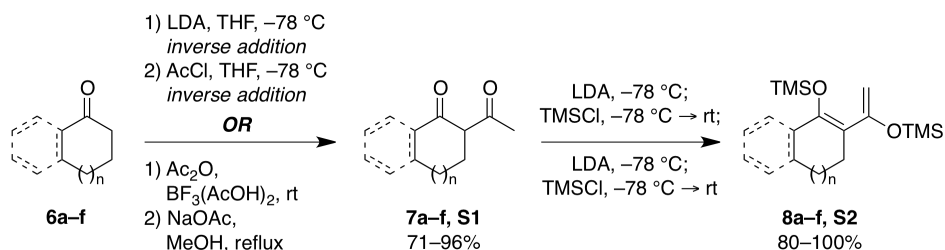

**Supplementary Figure 8. Synthesis of bis(trimethylsiloxy)dienes 8.** The 1,3-diketones **7** were synthesized using acylation protocols reported by Seebach (aliphatic backbones)<sup>3</sup> or Deshpande (benzannulated),<sup>4</sup> or were commercially available (**7a,d**). Bis(trimethylsiloxy)dienes **8** were then synthesized by successive treatment of 1,3-diketones **7** with LDA and trimethylchlorosilane at  $-78\text{ }^{\circ}\text{C}$ .<sup>5</sup> In the case of **8f**, TMSOTf was substituted for trimethylchlorosilane.

**1. SYNTHESIS OF 1,3-DIKETONES (7)****a. General protocol for  $\alpha$ -acylation of aliphatic cyclic ketones (Seebach)<sup>3</sup>**

In a roundbottom flask, *n*-butyllithium (1.60 M in hexanes, 1.10 equiv) was cooled to  $-78\text{ }^{\circ}\text{C}$ . Diisopropylamine (1.12 equiv) was added dropwise and, subsequently, THF was added to reach a final concentration of *ca.* 1.0 M. After stirring for 40 min at  $-78\text{ }^{\circ}\text{C}$ , a solution of the cyclic ketone **6** (1.00 equiv) in THF (0.67 M) was added slowly through a Teflon cannula. The resulting mixture was stirred for 1 h at  $-78\text{ }^{\circ}\text{C}$ , then added slowly via cannula to a roundbottom flask containing a precooled ( $-78\text{ }^{\circ}\text{C}$ ) solution of acetyl chloride (1.20 equiv) in THF (1.20 M). The reactions were judged complete after 1 h by TLC and were quenched with satd aq NH<sub>4</sub>Cl at  $-78\text{ }^{\circ}\text{C}$ . The reaction mixture was warmed to rt and extracted with EtOAc (3 $\times$ ). The combined organic extracts were dried (MgSO<sub>4</sub>), filtered, and concentrated by rotary evaporation. Purification by silica flash chromatography (hexanes/EtOAc) afforded the 1,3-diketone **7** in  $\geq 90\%$  purity, as judged by <sup>1</sup>H-NMR. The main impurity was the corresponding *O*-acylation product, observed in the <sup>1</sup>H- and <sup>13</sup>C-NMR spectra, which did not affect the subsequent transformation to bis(trimethylsiloxy)dienes (**8**), and was separable at that stage.

**Acetylcyclohexanone (7a).** Commercially available.

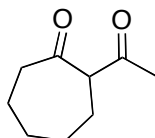

**2-Acetylcycloheptanone (7b).** Synthesized from cycloheptanone (561 mg, 5.00 mmol) and acetyl chloride (0.43 mL, 6.0 mmol). Purification by silica flash chromatography (10:1 hexanes/EtOAc) afforded **7b** as a colorless oil that solidified upon storage at  $-20\text{ }^{\circ}\text{C}$  (596 mg, 77%).

<sup>3</sup> Seebach, D.; Weller, T.; Protschuk, G.; Beck, A. K.; Hoekstra, M. S. *Helv. Chim. Acta* **1981**, *64*, 763.

<sup>4</sup> Patil, M. L.; Borate, H. B.; Ponde, D. E.; Deshpande, V. H. *Tetrahedron* **2002**, *58*, 6615.

<sup>5</sup> Sestelo, J. P.; del Mar Real, M.; Sarandeses, L. A. *J. Org. Chem.* **2001**, *66*, 1395.

**TLC:**  $R_f$  0.50 (4:1 hexanes/EtOAc). **mp** = 30.0–32.4 °C. **IR** (NaCl, film): 2925 (s, C–H st), 2853 (m, C–H st), 1602 (vs, br, C=O st, C=C st), 1442 (m), 1283 (m), 1205 (w), 986 (m), 967 (m), 832 (w), 773 (w).  **$^1\text{H-NMR}$**  (500 MHz):  $\delta$  16.46 (s, 1H), 2.55–2.52 (m, 2H), 2.38–2.36 (m, 2H), 2.11 (s, 3H), 1.77–1.67 (m, 4H), 1.58 (m, 2H).  **$^{13}\text{C-NMR}$**  (125 MHz):  $\delta$  200.4, 185.6, 111.8, 40.5, 31.7, 28.8, 26.9, 24.8, 22.2. **ESI-MS**  $m/z$  (rel int): (pos) 177.1 ( $[\text{M}+\text{Na}]^+$ , 100), 155.1 ( $[\text{M}+\text{H}]^+$ , 70); (neg) 153.0 ( $[\text{M}-\text{H}]^-$ , 50); 113.0 (100).

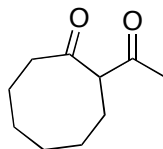

**2-Acetylcyclooctanone (7c).** Synthesized from cyclooctanone (6.30 g, 49.9 mmol) and acetyl chloride (4.30 mL, 60.0 mmol). Purification by silica flash chromatography (10:1 hexanes/EtOAc) afforded **7c** as a colorless oil that solidified upon storage at –20 °C (6.39 g, 76%).

**TLC:**  $R_f$  0.55 (4:1 hexanes/EtOAc). **IR** (NaCl, film): 2926 (s, C–H st), 2855 (m, C–H st), 1595 (vs, br, C=O st, C=C st), 1472 (m), 1451 (m), 1418 (m), 1279 (m), 1171 (w), 1089 (w), 990 (m), 955 (w), 890 (w), 850 (w).  **$^1\text{H-NMR}$**  (500 MHz):  $\delta$  16.71 (s, 1H), 2.49–2.46 (m, 2H), 2.43–2.40 (m, 2H), 2.16 (s, 3H), 1.78–1.73 (m, 2H), 1.60–1.45 (m, 6H).  **$^{13}\text{C-NMR}$**  (125 MHz): 193.4, 192.3, 109.3, 35.3, 30.2, 28.8, 26.5, 25.8, 25.3, 23.8. **ESI-MS**  $m/z$  (rel int): (pos) 359.1 ( $[2\text{M}+\text{Na}]^+$ , 20), 232.0 (38), 191.0 ( $[\text{M}+\text{Na}]^+$ , 100), 169.1 ( $[\text{M}+\text{H}]^+$ , 5); (neg) 167.0 ( $[\text{M}-\text{H}]^-$ , 100).

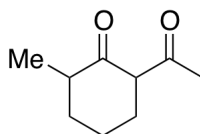

**2-acetyl-6-methylcyclohexanone<sup>6</sup> (S1).** Synthesized from 2-methylcyclohexanone (560 mg, 5.00 mmol) and acetyl chloride (0.424 mL, 6.00 mmol). Purification by silica flash chromatography (19:1 hexanes/EtOAc 0.5 vol% Et<sub>3</sub>N) afforded **S1** as a colorless oil (547 mg, 71%). All characterization data were in agreement with literature precedent.<sup>6</sup>

#### ***b. General protocol for $\alpha$ -acylation of benzannulated cyclic ketones (Deshpande)<sup>4</sup>***

In a roundbottom flask, the cyclic ketone **6** was dissolved in acetic anhydride (1.80 mL/mmol substrate) under Ar.  $\text{BF}_3(\text{AcOH})_2$  (4.00 equiv) was added dropwise and the reaction was stirred at rt for 4.5 h. The reaction mixture was poured onto ice and stirred until the solution reached rt. The mixture was then extracted with EtOAc (3 $\times$ ) and the combined organic extracts were concentrated by rotary evaporation. The crude product was dissolved in MeOH (10.0 mL/mmol substrate) and sat aq NaOAc (7.00 mL/mmol substrate), and the mixture was heated to reflux with stirring for 2.5 h. The reaction was then cooled to rt and MeOH was removed by rotary

<sup>6</sup> Kopka, I; Rathke, M. W. J. Org. Chem. 1981, 46, 3771.

evaporation. The crude product was extracted with EtOAc (3×) and the combined organic extracts were washed with brine, dried (MgSO<sub>4</sub>), filtered, and concentrated by rotary evaporation. Purification by silica flash chromatography (hexanes/EtOAc) afforded the 1,3-diketone **7**.

**2-Acetyltetralone (7d)**. Commercially available.

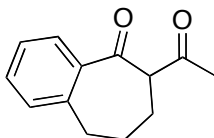

**6-Acetyl-6,7,8,9-tetrahydro-5H-benzo[7]annulen-5-one (2-acetylbenzosuberone, 7e)**. Synthesized from benzosuberone (500 mg, 3.12 mmol) and acetic anhydride (5.62 mL, as solvent). Purification by silica flash chromatography (19:1 hexanes/EtOAc) afforded **7e** as a light yellow oil that solidified upon storage at -20 °C (mp < rt) (606 mg, 96%).

**TLC**:  $R_f$  0.53 (4:1 hexanes/EtOAc). **IR** (NaCl, film): 2934 (m, C-H st), 2859 (w, C-H st), 1606 (vs, br, C=O st), 1560 (s, C=C st), 1454 (m), 1420 (m), 1296 (s), 1202 (w), 1181 (w), 1162 (w), 968 (m), 766 (m). **<sup>1</sup>H-NMR** (500 MHz):  $\delta$  16.42 (s, 1H), 7.62 (dd, 1H,  $J = 7.5, 1.5$ ), 7.39 (ddd, 1H,  $J = 7.5, 7.4, 1.5$ ), 7.34 (ddd, 1H,  $J = 7.4, 7.5, 1.3$ ), 7.20 (d, 1H,  $J = 7.4$ ), 2.69 (t, 2H,  $J = 6.9$ ), 2.25 (s, 3H), 2.16 (t, 2H,  $J = 6.9$ ), 2.02 (quint, 2H,  $J = 6.9$ ). **<sup>13</sup>C-NMR** (125 MHz):  $\delta$  190.3, 188.2, 139.9, 137.5, 131.1, 128.8, 127.6, 126.7, 109.6, 31.2, 31.1, 23.8, 23.0. **ESI-MS**  $m/z$  (rel int): (pos) 427.1 ([2M+Na]<sup>+</sup>, 23), 225.0 ([M+Na]<sup>+</sup>, 100), 203.1 ([M+H]<sup>+</sup>, 9); (neg) 201.0 ([M+H]<sup>-</sup>, 100).

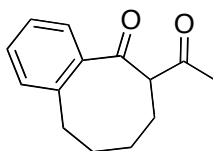

**6-Acetyl-7,8,9,10-tetrahydrobenzo[8]annulen-5(6H)-one (2-acetylbenzocyclooctanone, 7f)**. Synthesized from 7,8,9,10-tetrahydrobenzo[8]annulen-5(6H)-one (100 mg, 0.574 mmol) and acetic anhydride (1.00 mL). Purification by silica flash chromatography (19:1 hexanes/EtOAc) afforded **7f** as a crystalline, colorless solid (111 mg, 90%).

**TLC**:  $R_f$  0.77 (4:1 hexanes/EtOAc). **mp** = 62.8–68.4 °C. **IR** (NaCl, film): 2932 (s, C-H st), 2854 (w, C-H st), 1608/1583/1559 (vs, br, C=O st, C=C st), 1449 (m), 1399 (m), 1355 (m), 1290 (m), 1203 (w), 1188 (w), 1156 (w), 1094 (w), 1018 (w), 982 (m, br), 931 (w), 874 (w), 784 (m), 769 (m), 753 (s). **<sup>1</sup>H-NMR** (500 MHz):  $\delta$  16.3 (s, 1H), 7.39 (m, 2H), 7.28–7.23 (m, 2H), 2.83 (dd, 1H,  $J = 13.5, 8.4$ ), 2.59 (dd, 1H,  $J = 13.5, 11.5$ ), 2.46 (dd, 1H,  $J = 15.5, 7.9$ ), 2.29 (s, 3H), 2.09 (m, 1H), 1.95–1.92 (m, 1H), 1.73 (dd, 1H,  $J = 15.5, 10.8$ ), 1.47–1.41 (m, 2H). **<sup>13</sup>C-NMR** (125 MHz):  $\delta$  198.3, 181.9, 141.5, 135.4, 130.5, 129.9, 127.3, 126.1, 112.7, 32.9, 28.6, 27.8, 25.8, 25.1. **ESI-MS**  $m/z$  (rel int): (pos) 239.0 ([M+Na]<sup>+</sup>, 100), 216.9 ([M+H]<sup>+</sup>, 5).

## 2. SYNTHESIS OF BIS(TRIMETHYLSILOXY)DIENES (**8**, **S2**)

### General protocol for synthesis of bis(trimethylsiloxy)dienes<sup>5</sup>

In a roundbottom flask, *n*-butyllithium (1.60 M in hexanes, 1.10 equiv) was cooled to  $-78\text{ }^{\circ}\text{C}$ . Diisopropylamine (1.12 equiv) was added dropwise and, subsequently, THF was added to reach a final concentration of *ca.* 1.0 M. After stirring for 40 min at  $-78\text{ }^{\circ}\text{C}$ , the resulting suspension was removed from the cooling bath (upon warming slightly, a clear solution is formed) and subsequently transferred slowly via cannula to a roundbottom flask containing a precooled ( $-78\text{ }^{\circ}\text{C}$ ) solution of the 1,3-diketone **7** (1.00 equiv) in THF (0.20 M). The resulting mixture was stirred for 1 h at  $-78\text{ }^{\circ}\text{C}$ . Neat trimethylchlorosilane (TMSCl) (1.50 equiv) was added and the mixture was allowed to warm to rt (*ca.* 0.5 h) and stirred for an additional 1.5 h (the solution became turbid at this point in most cases). The reaction mixture was recooled to  $-78\text{ }^{\circ}\text{C}$  and a 1.0 M solution of LDA (prepared as described above) was added slowly at  $-78\text{ }^{\circ}\text{C}$  via cannula. The resulting mixture was stirred for 1 h at  $-78\text{ }^{\circ}\text{C}$ . Neat trimethylchlorosilane (1.50 equiv) was added and the mixture was allowed to warm to rt (*ca.* 0.5 h) and stirred for an additional 1.5 h. The solvent was removed by rotary evaporation and the crude product was taken up in a small amount of hexanes. Purification by filtration through a short column of basic aluminum oxide (99:1 hexanes/EtOAc) afforded the bis(trimethylsiloxy)diene **8** as colorless to yellow oil that can be stored neat at  $-20\text{ }^{\circ}\text{C}$  for several weeks without significant degradation.

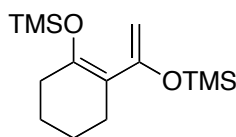

**Trimethyl(1-(2-(trimethylsilyloxy)cyclohex-1-enyl)vinyl)oxy)silane (**8a**)**. Synthesized from 2-acetyltetralone **7a** (2.10 g, 15.0 mmol) and TMSCl (2 × 2.84 mL, 22.5 mmol). Purification by filtration through basic aluminum oxide (99:1 hexanes/EtOAc) afforded **8a** as a slightly yellow liquid (4.27 g, quant).

**IR** (NaCl, film): 2960 (m, C–H st), 2935 (m, C–H st), 2862 (w), 2843 (w), 1650 (m, C=C st), 1612 (w, C=C st), 1364 (w), 1290 (m), 1254 (s, SiMe<sub>3</sub> δ sy), 1206 (s), 1150 (m), 1080 (w), 1047 (w), 1016 (m), 928 (s), 870 (s), 846 (vs, br, SiMe<sub>3</sub>, γ), 754 (m). **<sup>1</sup>H-NMR** (500 MHz): δ 4.52 (s, 1H), 4.35 (s, 1H), 2.14–2.07 (m, 4H), 1.63 (m, 2H), 1.56–1.53 (m, 2H), 0.19 (s, 9H), 0.18 (s, 9H). **<sup>13</sup>C-NMR** (125 MHz): δ 155.1, 147.2, 114.4, 94.1, 31.4, 26.5, 23.3, 22.9, 1.11, 0.3. **ESI-MS** *m/z* (rel int): (pos) 307.1 ([M+Na]<sup>+</sup>, 100), 213.1 ([M–TMS+H]<sup>+</sup>, 28); (neg) 211.0 ([M–TMS]<sup>–</sup>, 100), 283.0 ([M–H]<sup>–</sup>, 22).

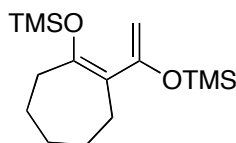

**Trimethyl(1-(2-(trimethylsilyloxy)cyclohept-1-enyl)vinyl)oxy)silane (**8b**)**. Synthesized from 2-acetylcycloheptanone **7b** (2.31 g, 15.0 mmol) and TMSCl (2 × 2.84 mL, 22.0 mmol). Purification by filtration through basic aluminum oxide (99:1 hexanes/EtOAc) afforded **8b** as a pale yellow oil (4.51 g, quant).

**IR** (NaCl, film): 2958 (m, C–H st), 2923 (s, C–H st), 2851 (m, C–H st), 1643 (m, C=C st), 1611 (m, C=C st), 1449 (w), 1300 (m), 1252 (s, SiMe<sub>3</sub> δ sy), 1223 (s), 1194 (m), 1146 (m), 1040 (m), 1015 (m), 936 (m), 892 (s), 843 (vs, br, SiMe<sub>3</sub>, γ). **<sup>1</sup>H-NMR** (500 MHz): δ 4.38 (s, 1H), 4.29 (s, 1H), 2.30 (m, 2H), 2.16 (m, 2H), 1.69 (m, 2H), 1.56–1.48 (m, 4H), 0.19 (s, 9H), 0.18 (s, 9H). **<sup>13</sup>C-NMR** (125 MHz): δ 155.5, 152.7, 119.6, 93.7, 36.2, 32.2, 28.8, 27.1, 25.1, 1.0, 0.4. **ESI-MS** *m/z* (rel int): (pos) 321.08 ([M+Na]<sup>+</sup>, 100), 299 ([M+H]<sup>+</sup>, 40), 249.3 ([M–TMS+Na]<sup>+</sup>, 66), 227.2 ([M–TMS+H]<sup>+</sup>, 52); (neg) 297.2 ([M–H]<sup>–</sup>, 28), 225.2 ([M–TMS]<sup>–</sup>, 25), 169.0 (100).

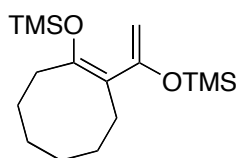

**Trimethyl(1-(2-(trimethylsilyloxy)cyclooct-1-enyl)vinyl)oxy)silane (8c).** Synthesized from 2-acetylcyclooctanone **7c** (1.68 g, 10.0 mmol) and TMSCl (2 × 1.90 mL, 15.0 mmol). Purification by filtration through basic aluminum oxide (99:1 hexanes/EtOAc) afforded **8c** as a pale yellow liquid (2.91 g, 93%).

**IR** (NaCl, film): 2959 (w), 2927 (m, C–H st), 2854 (w), 1644 (m, C=C st), 1613 (m, C=C st), 1306 (m), 1253 (s, SiMe<sub>3</sub> δ sy), 1221 (s), 1199 (m), 1130 (m), 1036 (m), 1015 (s), 978 (s), 845 (vs, br, SiMe<sub>3</sub>, γ). **<sup>1</sup>H-NMR** (500 MHz): δ 4.43 (s, 1H), 4.35 (s, 1H), 2.27–2.24 (m, 2H), 2.19–2.17 (m, 2H), 1.63 (m, 2H), 1.55–1.47 (m, 6H), 0.21 (s, 9H), 0.18 (s, 9H). **<sup>13</sup>C-NMR** (125 MHz): δ 154.7, 149.2, 116.7, 94.4, 32.8, 30.1, 28.6, 27.8, 26.9, 26.5, 1.1, 0.4. **ESI-MS** *m/z* (rel int): (pos) 335.3 ([M+Na]<sup>+</sup>, 28), 313.3 ([M+H]<sup>+</sup>, 30), 241.1 ([M–TMS+H]<sup>+</sup>, 100); (neg) 311.2 ([M–H]<sup>–</sup>, 18), 239.3 ([M–TMS]<sup>–</sup>, 18), 113 (100).

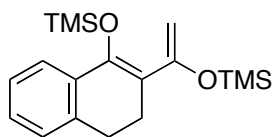

**Trimethyl(1-(1-(trimethylsilyloxy)-3,4-dihydronaphthalen-2-yl)vinyl)oxy)silane (8d).** Synthesized from 2-acetyl-α-tetralone **7d** (2.82 g, 15.0 mmol) and TMSCl (2 × 2.84 mL, 22.0 mmol). Purification by filtration through basic aluminum oxide (99:1 hexanes/EtOAc) afforded **8d** as a yellow oil (4.70 g, 94%).

**IR** (NaCl, film): 2958 (m, C–H st), 2895 (w, C–H st), 2838 (w), 1694 (w), 1665 (w), 1611 (m, C=C st), 1302 (s), 1259 (vs, SiMe<sub>3</sub> δ sy), 1208 (w), 1153 (s), 1084 (w), 1018 (s), 920 (s), 849 (vs, br, SiMe<sub>3</sub>, γ), 760 (s). **<sup>1</sup>H-NMR** (500 MHz): δ 7.45 (d, 1H, *J* = 7.6), 7.22–7.11 (m, 3H), 4.83 (s, 1H), 4.54 (s, 1H), 2.74 (t, 2H, *J* = 7.7), 2.46 (t, 2H, *J* = 7.7), 0.26 (s, 9H), 0.22 (s, 9H). **<sup>13</sup>C-NMR** (125 MHz): δ 154.0, 145.1, 137.3, 134.7, 127.3, 126.7, 126.1, 123.4, 117.9, 96.3, 28.4, 25.0, 0.9, 0.4. **ESI-MS** *m/z* (rel int): (pos) 355.3 ([M+Na]<sup>+</sup>, 100), 261 ([M–TMS+H]<sup>+</sup>, 57).

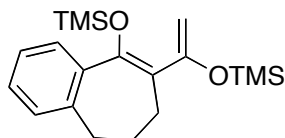

**Trimethyl(1-(9-(trimethylsilyloxy)-6,7-dihydro-5H-benzo[7]annulen-8-yl)vinyl)oxy)silane (8e).** Synthesized from 2-acetylbenzosuberone **7e** (1.10 g, 5.44 mmol) and TMSCl ( $2 \times 1.03$  mL, 8.12 mmol). Purification by filtration through basic aluminum oxide (99:1 hexanes/EtOAc) afforded **8e** as a yellow oil (1.74 g, 92%).

**IR** (NaCl, film): 3066 (w), 3020 (w), 2958 (m, C–H st), 2935 (m, C–H st), 2857 (w, C–H st), 1618 (m, C=C st), 1601 (m), 1449 (w), 1312 (w), 1277 (m), 1251 (s, SiMe<sub>3</sub> δ sy), 1200 (w), 1187 (w), 1147 (m), 1122 (w), 1089 (w), 1019 (m), 1009 (m), 889 (s), 874 (s), 843 (vs, br, SiMe<sub>3</sub>, γ). **<sup>1</sup>H-NMR** (500 MHz): δ 7.42 (dd, 1H,  $J = 7.5, 1.4$ ), 7.23–7.19 (m, 2H), 7.15 (dd, 1H,  $J = 7.2, 1.3$ ), 4.82 (s, 1H), 4.49 (s, 1H), 2.60 (t, 2H,  $J = 7.0$ ), 2.07 (quint, 2H,  $J = 7.0$ ), 1.89 (t, 2H,  $J = 7.0$ ), 0.25 (s, 9H), 0.02 (s, 9H). **<sup>13</sup>C-NMR** (125 MHz): δ 154.6, 146.7, 140.3, 139.7, 139.3, 128.5, 128.0, 127.9, 125.8, 118.8, 94.9, 34.7, 32.3, 26.0, 0.9, 0.4. **ESI-MS**  $m/z$  (rel int): (pos) 369.3 ([M+Na]<sup>+</sup>, 100), 275.3 ([M–TMS+2H]<sup>+</sup>, 43); (neg) 345.0 ([M–H]<sup>–</sup>, 8), 273 ([M–TMS]<sup>–</sup>, 100), 201 (54), 169 ([M–2TMS+H]<sup>–</sup>, 80).

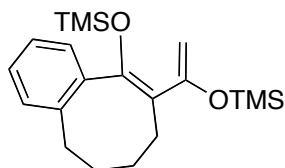

**Trimethyl(1-(5-(trimethylsilyloxy)-7,8,9,10-tetrahydrobenzo[8]annulen-6-yl)vinyl)oxy)silane (8f).** Synthesized by a modified version of the general protocol using TMSOTf. In a 50 mL roundbottom flask, *n*-butyllithium (1.59 M in hexanes, 1.44 mL, 2.29 mmol, 1.10 equiv) was cooled to  $-78$  °C. Diisopropylamine (0.35 mL, 2.50 mmol 1.20 equiv) was added dropwise and, subsequently, Et<sub>2</sub>O (0.50 mL) was added. After stirring for 40 min at  $-78$  °C, a solution of 2-acetylbenzocyclooctanone **7f** (450 mg, 2.10 mmol, 1.00 equiv) in Et<sub>2</sub>O (10.5 mL) was added slowly via Teflon cannula. The resulting slurry was stirred for 1 h at  $-78$  °C, then trimethylsilyl trifluoromethanesulfonate (0.79 mL, 4.41 mmol, 2.10 equiv) was added neat via syringe. The mixture was allowed to warm to rt and stirred for an additional 1 h. Et<sub>3</sub>N (2.20 mL, 15.8 mmol, 7.50 equiv) was added, followed by hexanes (*ca.* 15.0 mL). The resulting slurry was filtered twice through a plug of celite (hexanes) and concentrated by rotary evaporation. Drying under high vacuum afforded **8f** as a yellow liquid (739 mg, 98%).

**IR** (NaCl, film): 2957 (m, C–H st), 2928 (m C–H st), 2856 (w, C–H st), 1626 (m, br, C=C st), 1487 (w), 1449 (w), 1305 (m), 1275 (m), 1252 (s, SiMe<sub>3</sub> δ sy), 1185 (m), 1149 (m), 1094 (m), 1016 (m), 884 (s), 844 (vs, br, SiMe<sub>3</sub>, γ), 761 (m). **<sup>1</sup>H-NMR** (500 MHz): δ 7.33 (d, 1H,  $J = 7.6$ ), 7.25–7.14 (m, 3H), 4.61 (s, 1H), 4.52 (s, 1H), 2.78 (dd, 1H,  $J = 12.6, 8.2$ ), 2.67 (t, 1H,  $J = 12.3$ ), 2.32 (dd, 1H,  $J = 13.7, 8.2$ ), 2.04–2.00 (m, 1H), 1.65–1.61 (m, 1H), 1.47–1.26 (m, 3H), 0.22 (s, 9H),  $-0.05$  (s, 9H). **<sup>13</sup>C-NMR** (125 MHz): δ 154.7, 145.8, 142.3, 137.2, 129.5, 128.6, 128.6, 125.3, 120.3, 95.7, 33.4, 29.0, 27.6, 24.9, 1.1, 0.3. **ESI-MS**  $m/z$  (rel int): (pos) 383.4 ([M+Na]<sup>+</sup>, 9), 361.5 ([M+H]<sup>+</sup>, 45), 329.4 (58), 289.3 ([M–TMS+H]<sup>+</sup>, 100).



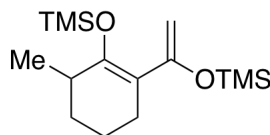

**Trimethyl((1-(3-methyl-2-((trimethylsilyl)oxy)cyclohexyl)vinyl)oxy)silane (S2).** Synthesized from 2-acetyl-6-methylcyclohexanone **S1** (285 mg, 1.85 mmol) and TMSCl (2 × 0.354 mL, 2.78 mmol). Purification by filtration through basic aluminum oxide (99:1 hexanes/EtOAc) afforded **S2** as a pale yellow oil (439 mg, 80%).

**IR** (NaCl, film): 2959 (s, C–H st), 2933 (s), 2858 (m, C–H st), 1643 (s), 1613 (s), 1457 (w), 1407 (w), 1374 (w), 1355 (w), 1340 (w), 1286 (s), 1252 (vs), 1224 (m), 1210 (m), 1186 (s), 1174 (s), 1147 (s), 1115 (w), 1086 (w), 1068 (w), 1015 (s), 974 (w), 919 (s), 844 (vs), 752 (m). **<sup>1</sup>H-NMR** (500 MHz): δ 4.44 (s, 1H), 4.32 (s, 1H), 2.20–2.13 (m, 2H), 2.07–2.02 (m, 1H), 1.74 (dddt, 1H, *J* = 12.6, 9.5, 6.2, 3.1), 1.64–1.55 (m, 1H), 1.48 (ttd, 1H, *J* = 10.5, 5.3, 2.5), 1.39 (dddd, 1H, *J* = 11.8, 8.7, 5.4, 3.0), 1.08 (d, 3H, *J* = 7.0), 0.18 (d, 18H, *J* = 8.6). **<sup>13</sup>C-NMR** (125 MHz): δ 155.4, 150.7, 115.0, 94.1, 34.7, 31.4, 27.2, 19.8, 19.0, 0.86, 0.26. **ESI-MS** *m/z* (rel int): (pos) 227.3 ([M–TMS+H]<sup>+</sup>, 100), 299.2 ([M+H]<sup>+</sup>, 25).

---

### C. SYNTHESIS OF DIHYDROPYRONES AND DIHYDROPYRIDONES (9, 10, S3–6)

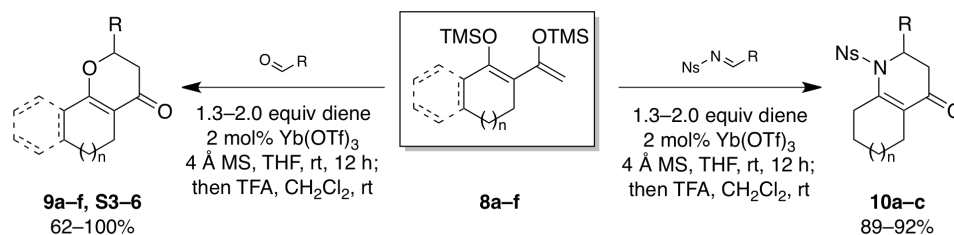

**Supplementary Figure 9. Synthesis of dihydropyrones 9, S3–6 and dihydropyridones 10.** The bis-(trimethylsilyloxy)dienes **8** were reacted with various dienophiles using  $\text{Yb}(\text{OTf})_3$  as a Lewis acid catalyst; the inclusion of molecular sieves is essential for efficient reaction. Treatment with TFA/ $\text{CH}_2\text{Cl}_2$  then cyclizes the primary Mukaiyama aldol adduct (the linear intermediate was isolated and characterized by  $^1\text{H-NMR}$  and MS in the case of **9a**) and removes remaining TMS groups. In the presence of acid-labile functionalities, TFA can be replaced by formic acid.

#### 1. SYNTHESIS OF DIENOPHILES

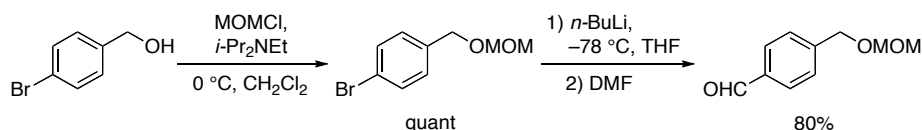

**Supplementary Figure 10. Synthesis of 4-([methoxymethoxy]methyl)benzaldehyde.** 4-Bromobenzyl alcohol was MOM-protected using standard literature conditions.<sup>7</sup> The crude product was then treated with *n*-butyllithium at –78 °C, and the resulting aryl lithium reagent was reacted with *N,N*-dimethylformamide to give the desired aldehyde after aqueous workup.

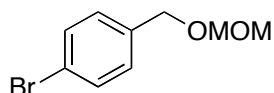

**1-Bromo-4-((methoxymethoxy)methyl)benzene.** In a 25 mL roundbottom flask, 4-bromobenzyl alcohol (374 mg, 2.00 mmol) was dissolved in diisopropylethyl amine (8.00 mL) and  $\text{CH}_2\text{Cl}_2$  (2.00 mL). The solution was cooled to 0 °C and chloro(methoxy)methane (1.52 mL, 20.0 mmol, 10.0 equiv) was added slowly over 10 min. After stirring for 1 h at 0 °C, TLC analysis of a reaction aliquot indicated full conversion. Satd aq  $\text{NaHCO}_3$  was added to quench excess chloro(methoxy)methane. Satd aq  $\text{NH}_4\text{Cl}$  was added and the mixture was extracted with EtOAc (3×). The combined organic extracts were washed with water (2×) and brine, dried ( $\text{MgSO}_4$ ), filtered, and concentrated by rotary evaporation. The crude residue was redissolved in a small volume of hexanes and filtered through a pad of celite. Removal of the solvent by rotary evaporation afforded the crude product as a light brown-orange, slightly volatile liquid that displays a characteristic scent (461 mg, quant). The crude product was sufficiently pure, as judged by NMR, for use in the next step without further purification.

**TLC:**  $R_f$  0.42 (9:1 hexanes/EtOAc).  **$^1\text{H-NMR}$**  (500 MHz):  $\delta$  7.48 (d, 2H,  $J = 8.3$ ), 7.23 (d, 2H,  $J = 8.3$ ), 4.69 (s, 2H), 4.54 (s, 2H), 3.40 (s, 3H).  **$^{13}\text{C-NMR}$**  (125 MHz):  $\delta$  136.9, 131.7, 129.6,

<sup>7</sup> Stork, G.; Takahashi, T. *J. Am. Chem. Soc.* **1977**, *99*, 1275.

121.7, 95.9, 68.6, 55.6. The  $^1\text{H}$ - and  $^{13}\text{C}$ -NMR data are in accordance with those reported in the literature.<sup>8</sup>

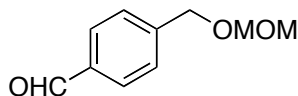

**4-((Methoxymethoxy)methyl)benzaldehyde.** In a 50 mL roundbottom flask, 1-bromo-4-([methoxymethoxy]methyl)benzene (878 mg, 3.80 mmol) was dissolved in THF (7.60 mL) and the resulting solution was cooled to  $-78\text{ }^\circ\text{C}$ . *n*-Butyllithium (1.56 M in hexanes, 2.68 mL, 4.18 mmol, 1.10 equiv) was added dropwise over 20 min. The bromine/lithium exchange was generally complete after 30–40 min as indicated by  $^1\text{H}$ -NMR analysis (see below) of reaction aliquots (quench with satd aq  $\text{NH}_4\text{Cl}$ , extract with  $\text{Et}_2\text{O}$ , dry ( $\text{MgSO}_4$ ), concentrate by rotary evaporation; high vacuum is to be avoided due to the considerable volatility of ([methoxymethoxy]methyl)benzene). Subsequently, DMF (0.50 mL, excess) was added neat in one portion. After 1 h at  $-78\text{ }^\circ\text{C}$ , TLC analysis of reaction aliquots (workup as described above) indicated full conversion. Satd aq  $\text{NH}_4\text{Cl}$  and water (1:1, v/v) was added at  $-78\text{ }^\circ\text{C}$  and the resulting mixture was warmed to rt and extracted with  $\text{EtOAc}$  (2 $\times$ ). The combined organic extracts were washed with water (2 $\times$ ) and brine, dried ( $\text{MgSO}_4$ ), filtered, and concentrated by rotary evaporation. Purification by silica flash chromatography (short column, 9:1 hexanes/ $\text{EtOAc}$ , 0.5 vol%  $\text{Et}_3\text{N}$ ) afforded 4-([methoxymethoxy]methyl)benzaldehyde as a colorless liquid (546 mg, 80%).

**NOTE:** The product is easily oxidized in air and should be stored under Ar atmosphere at low temperature.

**TLC:**  $R_f$  0.27 (9:1 hexanes/ $\text{EtOAc}$ , double elution).  **$^1\text{H}$ -NMR** (500 MHz):  $\delta$  10.01 (s, 1H), 7.87 (d, 2H,  $J = 8.1$ ), 7.53 (d, 2H,  $J = 8.1$ ), 4.74 (s, 2H), 4.68 (s, 2H), 3.42 (s, 3H).  **$^{13}\text{C}$ -NMR** (125 MHz):  $\delta$  192.0, 145.2, 135.9, 130.0, 128.0, 96.2, 68.7, 55.7. The  $^1\text{H}$ -NMR data are in accordance with those reported in the literature.<sup>9</sup>

<sup>8</sup> Chen, D.-W.; Beuscher, A. E. IV; Stevens, R. C.; Wirsching, P.; Lerner, R. A.; Janda, K. D. *J. Org. Chem.* **2001**, *66*, 1725.

<sup>9</sup> Sato, Y.; Sawaki, R.; Saito, N.; Mori, M. *J. Org. Chem.* **2002**, *673*, 656.

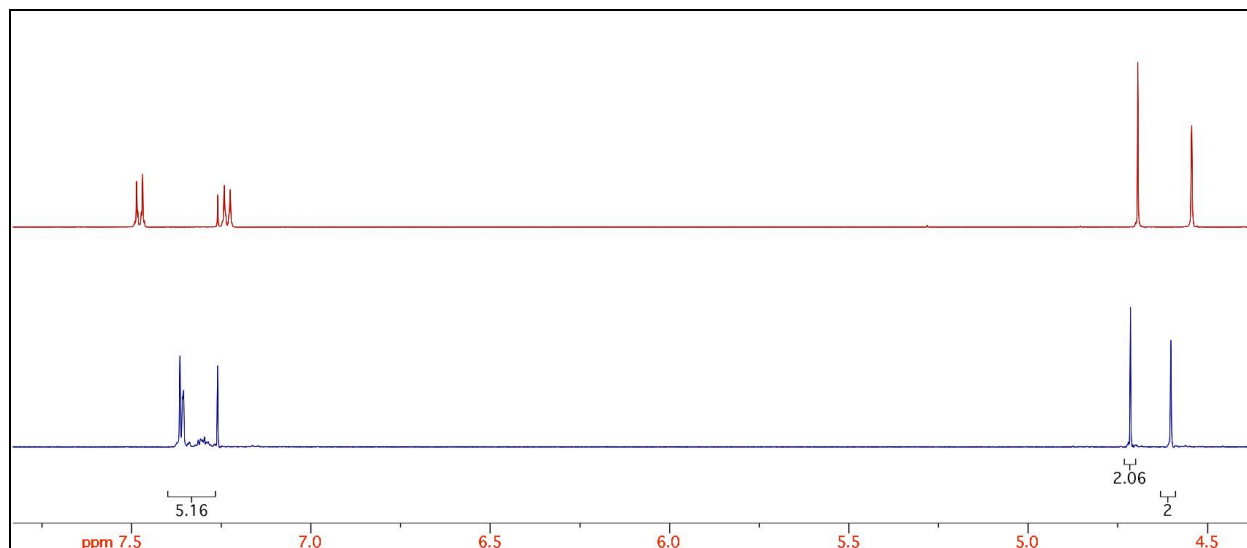

**Monitoring of bromine/lithium exchange by <sup>1</sup>H-NMR in CDCl<sub>3</sub>.** The <sup>1</sup>H-NMR spectrum of a reaction aliquot, quenched after 40 min at  $-78\text{ }^{\circ}\text{C}$  (black, lower trace), shows no remaining starting bromide (brown, top trace).

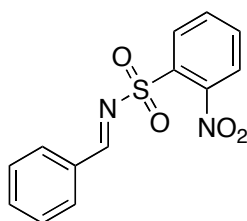

***N*-Benzylidene-2-nitrobenzenesulfonamide.** Synthesized as previously described.<sup>10</sup> Toluene (35.0 mL) and benzaldehyde (738 mg, 6.95 mmol, 1.10 equiv) were added to a 35 mL roundbottom flask containing activated 4 Å molecular sieves and *p*-nitrobenzenesulfonamide (1.28 g, 6.33 mmol, 1.00 equiv). Amberlyst 15 resin (catalytic) was then added and the mixture was heated at reflux for 20 h under a Dean–Stark trap. The mixture was cooled to rt and filtered through a pad of celite. The pad was washed with additional toluene and the filtrate was concentrated by rotary evaporation to afford a light tan solid. The solid was washed with hexanes, then placed under high vacuum for 1 h to afford *N*-benzylidene-2-nitrobenzenesulfonamide as a light tan solid (1.36 g, 74%).

**mp** = 125.2–129.3 °C. **<sup>1</sup>H-NMR** (500 MHz):  $\delta$  9.09 (s, 1H), 8.40 (d, 1H,  $J = 6.9$ ), 8.00 (d, 2H,  $J = 6.9$ ), 7.83–7.79 (m, 3H), 7.67 (t, 1H,  $J = 7.4$ ), 7.53 (t, 2H,  $J = 7.7$ ). **<sup>13</sup>C-NMR** (125 MHz):  $\delta$  174.1, 148.8, 136.0, 134.9, 132.9, 132.4, 132.1, 129.6, 125.1. **ESI-MS**  $m/z$  (rel int): (neg) 291 ([M+H]<sup>+</sup>, 10), 313 ([M+Na]<sup>+</sup>, 95), 345 ([M+Na]<sup>+</sup>, 100).

<sup>10</sup> Raheem, I. T.; Jacobsen, E. N. *Adv. Synth. Catal.* **2005**, 347, 1701.

## 2. SYNTHESIS OF DIHYDROPYRONES AND DIHYDROPYRIDONES (9, 10, S3–6)

### General protocol for $\text{Yb}(\text{OTf})_3$ -catalyzed Diels–Alder reactions

Freshly ground molecular sieves were extensively pre-dried in a round bottom flask under high vacuum using a Bunsen burner flame. A high temperature is maintained over a period of 30 min by heating until  $\text{Na}^+$  is emitted from the glass surface, giving the blue gas flame a yellow color, but not beyond this temperature. **CAUTION: Overheating or maintaining this temperature for extended periods may cause the flask to melt or implode! Use of a blast shield is recommended.** After cooling, the molecular sieves are stored under Ar.

The 4 Å molecular sieves prepared above (660 mg/mmol dienophile) were placed in a roundbottom flask, and flame dried under high vacuum. After cooling to rt, THF (3.0 mL/mmol dienophile) was added, followed by the bis(trimethylsiloxy)diene **8a–f** (1.05–2.00 equiv) and the dienophile (1.00 equiv). Neat  $\text{Yb}(\text{OTf})_3$  (2.0 mol%) was added, the flask was sealed with a glass stopper, and the mixture was stirred overnight at rt. TLC analysis of a reaction aliquot (diluted with EtOAc) indicated complete consumption of the dienophile and formation of the intermediate Mukaiyama aldol product. The reaction mixture was then filtered through a pad of celite and the pad was rinsed thoroughly with EtOAc and  $\text{CH}_2\text{Cl}_2$ . The solvents were then removed by rotary evaporation.

**NOTE:** In cases where the Mukaiyama addition step proceeded sluggishly, it was found that using  $\text{CH}_2\text{Cl}_2$  as the solvent in place of THF increased the speed of the reaction. For reactions that worked well in THF, the use of  $\text{CH}_2\text{Cl}_2$  was associated with the formation of trace side products. Thus, it is recommended to use  $\text{CH}_2\text{Cl}_2$  only in the case of sluggish reactions or in the event of solubility issues.

The resulting residue was dissolved in  $\text{CH}_2\text{Cl}_2$  (9.5 mL/mmol dienophile) in an Ar-flushed roundbottom flask. TFA (0.5 mL/mmol dienophile) was added and the mixture was stirred at rt for *ca.* 30 min, after which the reaction was judged complete by TLC in most cases. (Some substrates (for example from the benzannulated series) may require longer reaction times; reaction intermediates may be detected by TLC, but disappear over time; in some cases they were indentified as the TMS-protected Mukaiyama adducts befor cyclodehydration). The reaction was quenched with satd aq  $\text{NaHCO}_3$  and the mixture was stirred vigorously for 20 min. The layers were separated and the aqueous layer was extracted with  $\text{CH}_2\text{Cl}_2$  (3×). The combined organic extracts were dried ( $\text{MgSO}_4$ ), filtered, and concentrated by rotary evaporation. Purification by silica flash chromatography (hexanes/EtOAc) afforded the dihydropyrone **9a–f** or dihydropyridone **10a–c**.

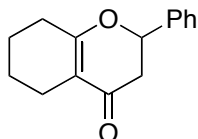

**2-Phenyl-5,6,7,8-tetrahydro-2H-chromen-4(3H)-one (9a).** Synthesized from bis(trimethylsiloxy)diene **8a** (1.48 g, 5.20 mmol) and benzaldehyde (424 mg, 4.00 mmol). Purification by silica flash chromatography (10:1 hexanes/EtOAc, 10:1) afforded **9a** as a pale yellow, crystalline solid (800 mg, 88%).

**TLC:**  $R_f$  0.16 (10:1 hexanes/EtOAc). **mp** = 50.4–54.5 °C. **IR** (NaCl, film): 2934 (m, C–H st), 2857 (w, C–H st), 1663 (vs, C=O st), 1615 (vs, C=C st), 1452 (w), 1406 (s), 1300 (m), 1192 (m), 1147 (s), 1002 (m), 973 (m), 911 (m), 760 (m), 701 (m).  **$^1\text{H-NMR}$**  (500 MHz):  $\delta$  7.43–7.35 (m, 5H), 5.34 (dd, 1H,  $J$  = 14.5, 3.4), 2.86 (dd, 1H,  $J$  = 16.8, 14.5), 2.63 (dd, 1H,  $J$  = 16.8, 3.4), 2.42–2.18 (m, 4H), 1.85–1.73 (m, 2H), 1.68–1.60 (m, 1H), 1.56–1.48 (m, 1H).  **$^{13}\text{C-NMR}$**  (125 MHz):  $\delta$  192.0, 171.5, 138.9, 128.9, 128.7, 126.2, 112.6, 80.0, 43.2, 28.8, 22.2, 22.0, 20.9 **ESI-MS**  $m/z$  (rel int): (pos) 479.4 ( $[2\text{M}+\text{Na}]^+$ , 100), 251.2 ( $[\text{M}+\text{Na}]^+$ , 48), 229.2 ( $[\text{M}+\text{H}]^+$ , 49).

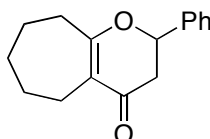

**2-Phenyl-2,3,6,7,8,9-hexahydrocyclohepta[b]pyran-4(5H)-one (9b).** Synthesized from bis(trimethylsiloxy)diene **8b** (894 mg, 3.00 mmol) and benzaldehyde (212 mg, 2.00 mmol). Purification by silica flash chromatography (10:1 hexanes/EtOAc) afforded **9b** as colorless, crystalline solid (464 mg, 96%).

**TLC:**  $R_f$  0.21 (10:1 hexanes/EtOAc). **mp** = 55.8–58.2 °C. **IR** (NaCl, film): 2921 (m, C–H st), 2798 (w, C–H st), 1658 (vs, C=O st), 1605 (vs, C=C st), 1444 (m), 1399 (s), 1360 (m), 1331 (m), 1225 (m), 1159 (m), 1125 (s), 1000 (w), 891 (w).  **$^1\text{H-NMR}$**  (500 MHz):  $\delta$  7.41–7.35 (m, 5H), 5.31 (dd, 1H,  $J$  = 14.5, 3.4), 2.81 (dd, 1H,  $J$  = 16.7, 14.5), 2.61 (dd, 1H,  $J$  = 16.7, 3.4), 2.58–2.46 (m, 3H), 2.42 (ddd, 1H,  $J$  = 15.1, 9.2, 2.1), 1.79–1.61 (m, 4H), 1.57–1.46 (m, 2H).  **$^{13}\text{C-NMR}$**  (125 MHz):  $\delta$  191.0, 177.1, 138.8, 128.9, 128.8, 126.2, 116.9, 80.2, 42.4, 35.1, 31.9, 27.1, 25.1, 22.1. **ESI-MS**  $m/z$  (rel int): (pos) 507.2 ( $[2\text{M}+\text{Na}]^+$ , 100), 265.04 ( $[\text{M}+\text{Na}]^+$ , 10), 243.1 ( $[\text{M}+\text{H}]^+$ , 10); (neg) 241.0 ( $[\text{M}-\text{H}]^-$ , 85).

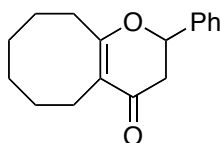

**2-Phenyl-5,6,7,8,9,10-hexahydro-2H-cycloocta[b]pyran-4(3H)-one (9c).** Synthesized from bis(trimethylsiloxy)diene **8c** (312 mg, 1.00 mmol) and benzaldehyde (53.0 mg, 0.499 mmol). Purification by silica flash chromatography (10:1 hexanes/EtOAc) afforded **9c** as a colorless oil (128 mg, quant).

**TLC:**  $R_f$  0.26 (10:1 hexanes/EtOAc). **IR** (NaCl, film): 3064 (w), 3034 (w), 3009 (w), 2925 (vs, C–H st), 2853 (s, C–H st), 1661 (vs, C=O st), 1609 (vs, C=C st), 1498 (w), 1455 (m), 1395 (s), 1360 (m), 1328 (m), 1223 (m), 1194 (m), 1169 (m), 1125 (s), 1085 (s), 1031 (w), 998 (m), 959 (w), 875 (m), 759 (s).  **$^1\text{H-NMR}$**  (500 MHz):  $\delta$  7.42–7.35 (m, 5H), 5.32 (dd, 1H,  $J$  = 14.2, 3.4), 2.82 (dd, 1H,  $J$  = 16.7, 14.2), 2.64 (dd, 1H,  $J$  = 16.7, 3.4), 2.53–2.48 (m, 3H), 2.37 (ddd, 1H,  $J$  = 13.9, 8.9, 4.7), 1.82–1.75 (m, 1H), 1.73–1.66 (m, 1H), 1.63–1.39 (m, 6H).  **$^{13}\text{C-NMR}$**  (125 MHz):  $\delta$  191.2, 173.6, 138.7, 128.8, 128.5, 126.1, 114.0, 79.7, 42.8, 31.7, 29.9, 28.7, 26.5, 26.4, 22.4. **ESI-MS**  $m/z$  (rel int): (pos) 791 ( $[3\text{M}+\text{Na}]^+$ , 24), 535 ( $[2\text{M}+\text{Na}]^+$ , 100), 311.0 ( $[\text{M}+\text{Na}]^+$ , 10), 257.1 ( $[\text{M}+\text{H}]^+$ , 100); (neg) 255.1 ( $[\text{M}-\text{H}]^-$ , 100).

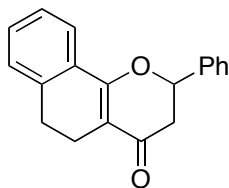

**2-Phenyl-5,6-dihydro-2H-benzo[*h*]chromen-4(3H)-one (9d).** Synthesized from bis(trimethylsiloxy)diene **8d** (166 mg, 0.499 mmol) and benzaldehyde (27.0 mg, 0.254 mmol). Purification by silica flash chromatography (10:1 hexanes/EtOAc) afforded **9d** as a colorless, crystalline solid (59.0 mg, 84%).

**TLC:**  $R_f$  0.16 (10:1 hexanes/EtOAc). **mp** = 120.8–121.7 °C. **IR** (NaCl, film): 3064 (w), 2941 (w, C–H st), 2895 (w, C–H st), 2845 (w, C–H st), 1656 (vs, C=O st), 1611 (s, C=C st), 1563 (s), 1451 (w), 1403 (vs), 1319 (m), 1259 (w), 1158 (m), 1110 (m), 1064 (w), 1029 (w), 954 (w), 919 (w), 870 (w). **<sup>1</sup>H-NMR** (500 MHz):  $\delta$  7.76–7.75 (m, 1H), 7.51–7.34 (m, 6H), 7.28–7.21 (m, 2H), 5.55 (dd, 1H,  $J$  = 14.2, 3.4), 2.98 (dd, 1H,  $J$  = 16.8, 14.2), 2.86 (m, 2H), 2.79 (dd, 1H,  $J$  = 16.8, 3.4), 2.71–2.64 (m, 2H). **<sup>13</sup>C-NMR** (125 MHz):  $\delta$  191.6, 164.2, 140.3, 138.9, 131.2, 129.4, 129.0, 128.8, 128.0, 126.8, 126.2, 124.5, 111.1, 80.3, 43.2, 27.7, 18.8. **ESI-MS**  $m/z$  (rel int): (pos) 575.4 ([2M+Na]<sup>+</sup>, 55), 299.2 ([M+Na]<sup>+</sup>, 52), 277.3 ([M+H]<sup>+</sup>, 100).

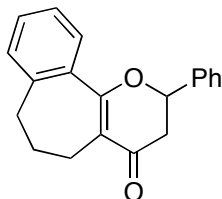

**[8.9]-Benzo-2-phenyl-2,3,5,6,7-pentahydrocyclohepta[*b*]pyran-4(5H)-one (9e).** Synthesized from bis(trimethylsiloxy)diene **8e** (173 mg, 0.499 mmol) and benzaldehyde (27.0 mg, 0.254 mmol). Purification by silica flash chromatography (10:1 hexanes/EtOAc, 10:1) afforded **9e** as an off-white solid (55.1 mg, 74%).

**TLC:**  $R_f$  0.19 (10:1 hexanes/EtOAc). **mp** = 106.8–107.9 °C. **IR** (NaCl, film): 3090 (w), 2931 (m, C–H st), 2857 (w, C–H st), 1659 (vs, C=O st), 1607 (s, C=C st), 1584 (s), 1567 (m), 1448 (w), 1394 (vs), 1331 (m), 1272 (m), 1238 (w), 1214 (w), 1198 (w), 1147 (s), 1111 (w), 1063 (w), 989 (w), 903 (w), 759 (m). **<sup>1</sup>H-NMR** (500 MHz):  $\delta$  7.61 (dd, 1H,  $J$  = 7.7, 1.3), 7.49–7.36 (m, 6H), 7.29 (m, 2H), 5.57 (dd, 1H,  $J$  = 14.3, 3.2), 3.05 (dd, 1H,  $J$  = 16.8, 14.3), 2.80–2.74 (m, 2H), 2.66 (dd, 2H,  $J$  = 8.7, 5.4), 2.22–2.09 (m, 2H), 1.73 (ddd, 1H,  $J$  = 13.7, 11.3, 7.4). **<sup>13</sup>C-NMR** (125 MHz):  $\delta$  191.6, 168.2, 142.4, 138.8, 134.7, 130.9, 129.6, 128.9, 128.8, 127.9, 126.5, 126.3, 115.3, 80.6, 43.2, 33.5, 32.4, 19.6. **ESI-MS**  $m/z$  (rel int): (pos) 291.0 ([2M+Na]<sup>+</sup>, 45), 313 ([M+Na]<sup>+</sup>, 100), 291.2 ([M+H]<sup>+</sup>, 85).

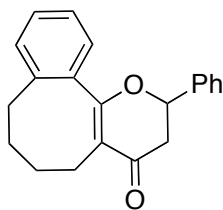

**[9.10]-Benzo-2-Phenyl-2,3,5,6,7,8-hexahydrocycloocta[b]pyran-4(5H)-one (9f).** Synthesized from bis(trimethylsiloxy)diene **8f** (271 mg, 0.75 mmol) and benzaldehyde (53.1 mg, 0.50 mmol). DCM was used as a solvent. Cyclization to the final product (TFA, CH<sub>2</sub>Cl<sub>2</sub>, rt) required 12 h. Purification by silica flash chromatography (10:1 hexanes/EtOAc) afforded **9f** as yellow resin that partially crystallized by time (139 mg, 91%).

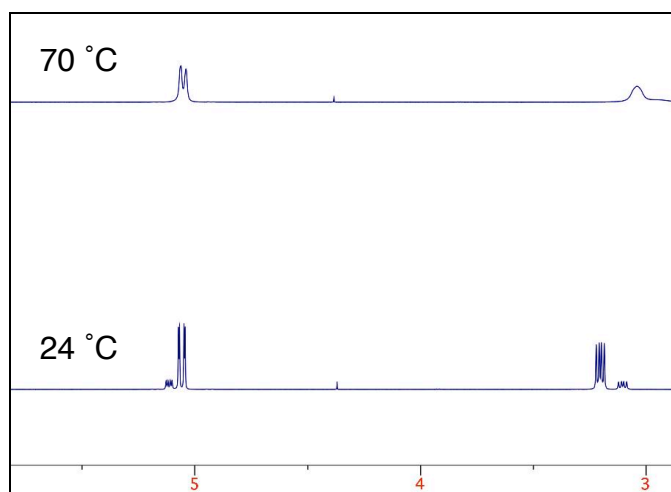

**<sup>1</sup>H-NMR signals of 9f in toluene-*d*<sub>8</sub> at ambient and elevated temperature.**

The <sup>1</sup>H- and <sup>13</sup>C-NMR spectra of **9f** exhibit two sets of signals at rt (5:1 ratio by <sup>1</sup>H-NMR), presumed to arise from atropisomers that do not interconvert rapidly on the NMR timescale at rt. The signals converge to a single set of peaks at higher temperatures in NMR experiments in toluene-*d*<sub>8</sub>. The major set of <sup>1</sup>H- and <sup>13</sup>C-NMR signals at 25 °C are reported below.

**TLC:** *R*<sub>f</sub> 0.19 (10:1 hexanes/EtOAc). **mp** = 75.6–77.5 °C. **IR** (NaCl, film): 3063 (w), 3019 (w), 2928 (m, C–H st), 2855 (w, C–H st), 1663 (vs, C=O st), 1611 (vs, C=C st), 1590 (s, C=C st), 1491 (w), 1451 (m), 1383 (vs), 1327 (m), 1283 (w), 1235 (w), 1183 (w), 1142 (s), 1100 (m), 1080 (w), 1064 (w), 1003 (m), 982 (w), 974 (w), 891 (w), 759 (s), 743 (m), 719 (w). **<sup>1</sup>H-NMR** (500 MHz, toluene-*d*<sub>8</sub>, 25 °C, main set of signals): δ 7.30 (dd, 1H, *J* = 7.9, 1.3), 7.11–7.02 (m, 5H), 6.98–6.95 (m, 3H), 5.01 (dd, 1H, *J* = 14.8, 2.9), 3.15 (dd, 1H, *J* = 13.6, 7.7), 2.65–2.58 (m, 2H), 2.48–2.44 (m, 2H), 1.86–1.82 (m, 1H), 1.76–1.71 (m, 1H), 1.43 (qd, 1H, *J* = 12.8, 4.9), 1.27–1.16 (m, 2H). **<sup>13</sup>C-NMR** (125 MHz): δ 192.2, 167.6, 143.3, 138.7, 132.9, 130.9, 130.2, 128.8, 128.7, 128.3, 126.2, 125.7, 116.9, 80.9, 43.6, 33.4, 28.6, 25.1, 23.4. **ESI-MS** *m/z* (rel int): (pos) 327.1 ([M+Na]<sup>+</sup>, 100), 305 ([M+H]<sup>+</sup>, 5); (neg) 303.1 ([M–H]<sup>–</sup>, 100).



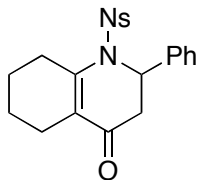

**1-(2-Nitrophenylsulfonyl)-2-phenyl-2,3,5,6,7,8-hexahydroquinolin-4(1H)-one (10a).** Synthesized from bis(trimethylsiloxy)diene **8a** (193 mg, 0.678 mmol) and *N*-benzylidene-2-nitrobenzenesulfonamide (100 mg, 0.344 mmol). Purification by silica flash chromatography (35:1 CHCl<sub>3</sub>/EtOAc) afforded **10a** as light yellow foam (128.5 mg, 92%).

**TLC:** *R<sub>f</sub>* 0.11 (2:1 hexanes/EtOAc). **IR** (NaCl, film): 3095 (w), 3068 (w), 3032 (w), 2943 (s, C–H st), 2866 (m, C–H st), 1671 (vs, C=O st), 1606 (s), 1546 (vs, N=O st), 1500 (m), 1452 (m), 1441 (m), 1377 (vs, S=O st), 1293 (m), 1174 (vs, S=O st), 1137 (vs, S=O st), 1046 (s), 1001 (m), 974 (m), 914 (s), 854 (m), 781 (s), 741 (vs). **<sup>1</sup>H-NMR** (500 MHz): δ 8.12 (dd, 1H, *J* = 7.8, 1.3), 7.82–7.72 (m, 3H), 7.34–7.27 (m, 5H), 5.73 (dd, 1H, *J* = 5.8, 1.7), 2.94 (m, 2H), 2.75 (dd, 1H, *J* = 17.7, 5.8), 2.31 (m, 2H), 2.07–2.01 (m, 1H), 1.73 (m, 1H), 1.59–1.47 (m, 2H), 1.39 (m, 1H). **<sup>13</sup>C-NMR** (125 MHz): δ 192.1, 150.2, 148.0, 137.4, 134.8, 133.3, 132.4, 131.0, 128.7, 128.1, 126.6, 125.0, 124.8, 59.3, 40.1, 31.6, 22.5, 22.1, 21.1. **ESI-MS** *m/z* (rel int): (pos) 435 ([M+Na]<sup>+</sup>, 100), 413 ([M+H]<sup>+</sup>, 25).

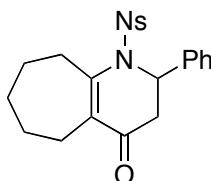

**1-(2-Nitrophenylsulfonyl)-2-phenyl-2,3,6,7,8,9-hexahydro-1H-cyclohepta[b]pyridin-4(5H)-one (10b).** Synthesized from bis(trimethylsiloxy)diene **8b** (203 mg, 0.680 mmol) and *N*-benzylidene-2-nitrobenzenesulfonamide (100 mg, 0.344 mmol). Purification by silica flash chromatography (35:1 CHCl<sub>3</sub>/EtOAc) afforded **10b** as light yellow foam (131.0 mg, 91%).

**TLC:** *R<sub>f</sub>* 0.18 (2:1 hexanes/EtOAc). **IR** (NaCl, film): 3092 (w), 3066 (w), 2924 (m, C–H st), 2853 (m, C–H st), 1664 (s, C=O st), 1603 (m), 1544 (vs, N=O st), 1450 (m), 1440 (m), 1375 (vs, S=O st), 1298 (m), 1171 (s), 1146 (m), 1131 (m), 1058 (w), 1021 (m), 1004 (w), 912 (w), 852 (w), 733 (s). **<sup>1</sup>H-NMR** (500 MHz): δ 8.10 (dd, 1H, *J* = 7.8, 1.4), 7.81 (td, 1H, *J* = 7.7, 1.4), 7.76–7.71 (m, 2H), 7.32 (m, 5H), 5.66 (dd, 1H, *J* = 5.7, 1.1), 2.88 (dd, 1H, *J* = 18.1, 1.1), 2.79 (dd, 1H, *J* = 14.76, 9.35), 2.72–2.66 (m, 2H), 2.55 (dd, 1H, *J* = 14.5, 9.6), 2.32 (dd, 1H, *J* = 14.5, 9.3), 1.73–1.66 (m, 1H), 1.59–1.49 (m, 2H), 1.43–1.35 (m, 1H), 1.21–1.05 (m, 2H). **<sup>13</sup>C-NMR** (125 MHz): δ 191.6, 155.1, 148.2, 137.4, 134.9, 132.9, 132.2, 131.9, 131.1, 128.7, 128.3, 127.2, 124.9, 58.9, 38.9, 35.9, 31.9, 25.4, 24.1, 23.6. **ESI-MS** *m/z* (rel int): (pos) 449 ([M+Na]<sup>+</sup>, 100), 427 ([M+H]<sup>+</sup>, 25).

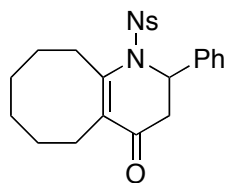

**1-(2-Nitrophenylsulfonyl)-2-phenyl-2,3,5,6,7,8,9,10-octahydrocycloocta[b]pyridin-4(1H)-one (10c).** Synthesized from bis(trimethylsiloxy)diene **8c** (213 mg, 0.681 mmol) and *N*-benzylidene-2-nitrobenzenesulfonamide (100 mg, 0.344 mmol). Purification by silica flash chromatography (35:1 CHCl<sub>3</sub>/EtOAc) afforded **10c** as light yellow foam (133 mg, 89%).

**TLC:**  $R_f$  0.32 (1:1 hexanes/EtOAc). **IR** (NaCl, film): 2922 (m, C–H st), 2851 (w, C–H st), 1665 (s, C=O st), 1591 (m), 1545 (vs, N=O st), 1498 (w), 1472 (w), 1450 (m), 1442 (m), 1376 (vs, S=O st), 1306 (m), 1280 (w), 1172 (s, S=O st), 1140 (m), 1123 (s), 1102 (w), 1046 (w), 982 (m), 971 (m), 945 (w), 912 (m), 779 (m), 732 (s). **<sup>1</sup>H-NMR** (500 MHz):  $\delta$  8.11 (dd, 1H,  $J = 7.9, 1.3$ ), 7.83–7.72 (m, 3H), 7.40–7.29 (m, 5H), 5.77 (d, 1H,  $J = 3.5$ ), 3.20 (dt, 1H,  $J = 14.2, 4.3$ ), 2.96 (dd, 1H,  $J = 17.9, 3.5$ ), 2.88 (ddd, 1H,  $J = 12.9, 5.3, 2.9$ ), 2.70–2.65 (m, 2H), 2.01 (t, 1H,  $J = 12.9$ ), 1.62–1.51 (m, 2H), 1.37–1.30 (m, 1H), 1.07–0.85 (m, 4H), 0.15–0.07 (m, 1H). **<sup>13</sup>C-NMR** (125 MHz):  $\delta$  191.8, 152.6, 148.3, 137.3, 134.9, 133.0, 132.3, 131.0, 129.2, 128.6, 127.9, 124.9, 58.5, 38.4, 30.9, 30.1, 28.4, 26.3, 24.9, 24.0; 1C-Ar not observed. **ESI-MS**  $m/z$  (rel int): (pos) 463 ([M+Na]<sup>+</sup>, 100).

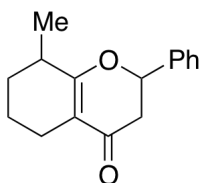

**8-Methyl-2-phenyl-5,6,7,8-tetrahydro-2H-chromen-4(3H)-one (S3).** Synthesized from bis(trimethylsiloxy)diene **S2** (400 mg, 1.34 mmol) and benzaldehyde (95.0 mg, 0.895 mmol). Purification by silica flash chromatography (9:1 hexanes/EtOAc) afforded **S3** as light yellow solid (203 mg, 94%, 1.3:1.0 dr).

**TLC:**  $R_f$  0.31 (4:1 hexanes/EtOAc). **IR** (NaCl, film): 2933 (s, C–H st), 2855 (m, C–H st), 1663 (vs, C=O st), 1607 (vs, C=C st), 1498 (w), 1454 (m), 1401 (s), 1369 (m), 1301 (m), 1288 (m), 1250 (w), 1217 (w), 1149 (s), 1066 (w), 994 (w), 901 (w), 759 (m). **<sup>1</sup>H-NMR** (500 MHz):  $\delta$  7.43–7.34 (m, 5H-major, 5H-minor), 5.31 (td, 1H-major, 1H-minor,  $J = 14.6, 3.3$ ), 2.82 (ddd, 1H-major, 1H-minor,  $J = 21.7, 16.8, 14.5$ ), 2.64 (td, 1H-major, 1H-minor,  $J = 16.4, 3.3$ ), 2.55–2.46 (m, 1H-major, 1H-minor), 2.44–2.33 (m, 1H-major, 1H-minor), 2.25–2.16 (m, 1H-major, 1H-minor), 1.95–1.89 (m, 1H-minor), 1.84–1.75 (m, 1H-major, 1H-minor), 1.67–1.61 (m, 1H-major, 1H-minor), 1.58–1.52 (m, 1H-major), 1.52–1.45 (m, 1H-minor), 1.41–1.34 (m, 1H-major), 1.23 (d, 3H-major,  $J = 7.0$ ), 1.20 (d, 3H-minor,  $J = 7.2$ ). **<sup>13</sup>C-NMR** (125 MHz):  $\delta$  192.4, 192.3, 174.5, 174.3, 139.2, 139.0, 128.7, 128.6, 128.4, 126.0, 125.9, 112.1, 112.0, 79.8, 79.7, 43.3, 43.0, 33.9, 32.7, 31.4, 30.2, 21.5, 21.3, 20.4, 18.7, 18.4, 18.0. **ESI-MS**  $m/z$  (rel int): (pos) 243.1 ([M+H]<sup>+</sup>, 100), 265.1 ([M+Na]<sup>+</sup>, 30), 507.4 ([2M+Na]<sup>+</sup>, 66).

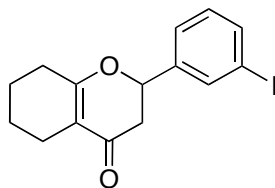

**2-(3-Iodophenyl)-5,6,7,8-tetrahydro-2H-chromen-4(3H)-one (S4).** Synthesized from bis(trimethylsiloxy)diene **8a** (568 mg, 2.00 mmol) and 3-iodobenzaldehyde (232 mg, 1.00 mmol). Purification by silica flash chromatography (10:1 hexanes/EtOAc) afforded **S4** as a reddish brown solid (313 mg, 88%).

**TLC:**  $R_f$  0.13 (10:1 hexanes/EtOAc). **mp** = 102.5–103.2 °C. **IR** (NaCl, film): 3060 (w), 3012 (w), 2936 (m, C–H st), 2861 (w, C–H st), 1729 (w), 1662 (s, C=O st), 1611 (vs, C=C st), 1566 (m), 1408 (s), 1354 (m), 1301 (m), 1214 (m), 1193 (m), 1148 (s), 1066 (m), 1033 (m), 995 (m), 974 (m), 920 (w). **<sup>1</sup>H-NMR** (500 MHz):  $\delta$  7.78 (s, 1H), 7.70 (d, 1H,  $J$  = 7.8), 7.34 (d, 1H,  $J$  = 7.8), 7.14 (t, 1H,  $J$  = 7.8), 5.27 (dd, 1H,  $J$  = 14.4, 3.4), 2.80 (dd, 1H,  $J$  = 16.7, 14.4), 2.62 (dd, 1H,  $J$  = 16.7, 3.4), 2.41–2.17 (m, 4H), 1.85–1.73 (m, 2H), 1.67–1.62 (m, 1H), 1.55–1.50 (m, 1H). **<sup>13</sup>C-NMR** (125 MHz):  $\delta$  191.5, 171.3, 141.2, 137.8, 135.2, 130.6, 125.4, 112.8, 94.7, 79.0, 43.2, 28.8, 22.2, 22.0, 20.9. **ESI-MS**  $m/z$  (rel int): (pos) 731.1 ([2M+Na]<sup>+</sup>, 100), 377.0 ([M+Na]<sup>+</sup>, 61), 355.0 ([M+H]<sup>+</sup>, 35); (neg) 371.1 ([M+OH]<sup>-</sup>, 57), 353.0 ([M-H]<sup>-</sup>, 100).

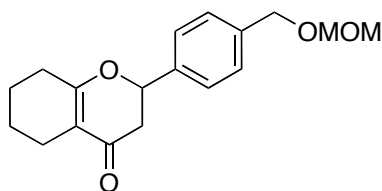

**2-(4-((Methoxymethoxy)methyl)phenyl)-5,6,7,8-tetrahydro-2H-chromen-4(3H)-one (S5).** Synthesized from bis(trimethylsiloxy)diene **8a** (284 mg, 1.00 mmol, 2.00 equiv) and 4-([methoxymethoxy]methyl)benzaldehyde (90.0 mg, 0.499 mmol, 1.00 equiv). Due to the instability of the MOM group towards TFA, formic acid (0.250 mL) in CH<sub>2</sub>Cl<sub>2</sub> (4.75 mL; 5% v/v) was used instead to induce cyclodehydration over *ca.* 6 h. The remaining workup was performed according to the general protocol. Purification by silica flash chromatography (10:1 hexanes/EtOAc, 0.5 vol% Et<sub>3</sub>N) afforded **S5** as a yellow resin (93.0 mg, 62%).

**TLC:**  $R_f$  0.63 (4:1 hexanes/EtOAc). **IR** (NaCl, film): 2932 (m, C–H st), 2886 (m, C–H st), 2858 (m, C–H st), 2824 (m, C–H st), 1664 (s, C=O st), 1616 (vs, C=C st), 1406 (s), 1300 (m), 1256 (w), 1218 (w), 1191 (m), 1148 (s, C–O/Si–O st), 1103 (m), 1047 (s, C–O/Si–O st), 1020 (w), 971 (w), 915 (w), 818 (m, Si–C st), 748 (w, Si–C st). **<sup>1</sup>H-NMR** (500 MHz):  $\delta$  7.33 (s, 4H), 5.27 (dd, 1H,  $J$  = 14.4, 3.4), 4.64 (s, 2H), 4.54 (s, 2H), 3.35–3.34 (m, 3H), 2.78 (dd, 1H,  $J$  = 16.8, 14.4), 2.55 (dd, 1H,  $J$  = 16.8, 3.4), 2.33–2.11 (m, 4H), 1.77–1.66 (m, 2H), 1.61–1.54 (m, 1H), 1.49–1.41 (m, 1H). **<sup>13</sup>C-NMR** (125 MHz):  $\delta$  192.0, 171.5, 138.6, 138.3, 128.3, 126.4, 112.6, 95.9, 79.8, 68.8, 55.5, 43.2, 28.8, 22.2, 22.0, 20.9. **ESI-MS**  $m/z$  (rel int): (pos) 627.1 ([2M+Na]<sup>+</sup>, 48), 416.1 (80), 359.0 (75), 324.9 ([M+Na]<sup>+</sup>, 100), 497.3 ([M+H]<sup>+</sup>, 19); (neg) 301.1 ([M-H]<sup>-</sup>, 100).

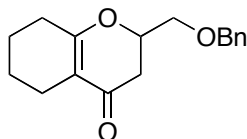

**2-(Benzyloxymethyl)-5,6,7,8-tetrahydro-2H-chromen-4(3H)-one (S6).** Synthesized from bis-(trimethylsiloxy)diene **8a** (369 mg, 1.30 mmol) and freshly distilled benzyloxyacetaldehyde (132 mg, 0.88 mmol). (**NOTE:** The quality of this aldehyde, even in newly opened commercial bottles, is highly variable; the use of freshly distilled reagent is strongly recommended.) Purification by silica flash chromatography (10:1 hexanes/EtOAc) afforded **S6** as a colorless, crystalline solid (192 mg, 71%).

**TLC:**  $R_f$  0.03 (10:1 hexanes/EtOAc). **mp** = 56.0–58.3 °C. **IR** (NaCl, film): 2933 (m, C–H st), 2860 (w, C–H st), 1663 (s, C=O st), 1615 (C=C st), 1452 (w), 1407 (m), 1353 (w), 1302 (m), 1201 (m), 1157 (m), 1122 (m, br), 1044 (w), 738 (w). **<sup>1</sup>H-NMR** (500 MHz):  $\delta$  7.38–7.29 (m, 5H), 4.61 (q, 2H,  $J$  = 11.1), 4.50 (ddt, 1H,  $J$  = 14.3, 4.9, 3.6), 3.70–3.64 (m, 2H), 2.69 (dd, 1H,  $J$  = 16.8, 14.3), 2.38 (dd, 1H,  $J$  = 16.8, 3.6), 2.34–2.13 (m, 4H), 1.81–1.67 (m, 2H), 1.64–1.56 (m, 1H), 1.52–1.44 (m, 1H). **<sup>13</sup>C-NMR** (125 MHz, acetone- $d_6$ ):  $\delta$  191.3, 170.7, 139.4, 129.1, 128.4, 128.3, 112.3, 78.1, 73.7, 72.0, 38.6, 29.0, 22.9, 22.6, 21.5. **ESI-MS**  $m/z$  (rel int): (pos) 567.3 ([2M+Na]<sup>+</sup>, 100), 545.3 ([2M+H]<sup>+</sup>, 32), 295.0 ([M+Na]<sup>+</sup>, 52), 273.0 ([M+H]<sup>+</sup>, 98); (neg) 271.0 ([M–H]<sup>–</sup>, 11).

---

## D. SYNTHESIS OF TBS-PROTECTED ALCOHOLS (13, 14, S11–15)

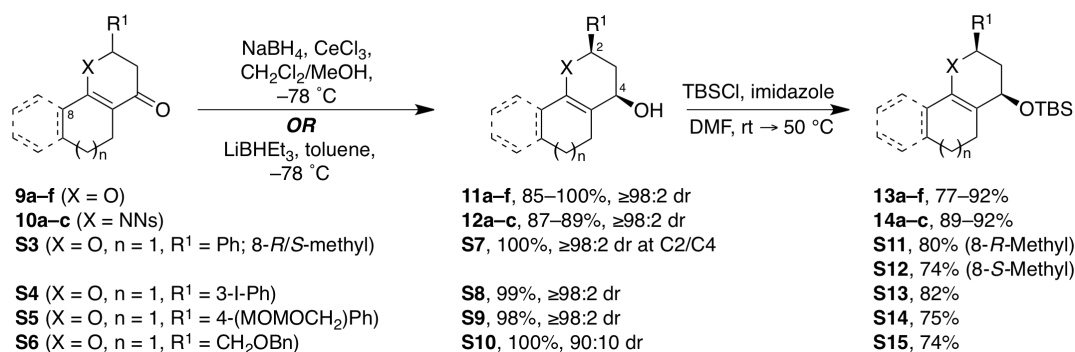

**Supplementary Figure 11. Synthesis of TBS-protected alcohols 11, 12, S11–15.** The Diels–Alder condensation products **9**, **10**, **S3–6** were reduced diastereoselectively using either modified Luche conditions (**9**, **S3–6**) or Super-Hydride (**10**) to afford alcohols **11**, **12**, **S7–10**. The crude alcohols were characterized by <sup>1</sup>H-NMR, <sup>13</sup>C-NMR, and MS. Relative stereochemistry at C2 and C4 was confirmed by NOESY experiments with **11a** (X = O, n = 1) and **12a** (X = NNs, n = 1), and assigned to other products by analogy. Silylation of the crude alcohols then afforded ring expansion substrates **13**, **14**, **S11–15**.

### 1. DIASTEREOSELECTIVE REDUCTION OF DIHYDROPYRONES (9, S3–6)

#### General protocol for low-temperature Luche reduction<sup>11</sup>

In a roundbottom flask, the dihydropyrone **9** or **S3–6** was dissolved in CH<sub>2</sub>Cl<sub>2</sub> (4.60 mL/mmol, 0.22 M solution) and cooled to –78 °C. A freshly prepared solution of anhyd cerium (III) chloride in MeOH (*ca.* 0.40 M, 3.0 equiv) was added slowly and the mixture was stirred at –78 °C for 20 min. Neat NaBH<sub>4</sub> (1.50 equiv) was added in one portion and the mixture was stirred at –78 °C until TLC analysis of a reaction aliquot (add to a solution of one drop of 1,3-propanediol in EtOAc, wash with satd aq NH<sub>4</sub>Cl) indicated completion of the reaction (usually 2 h). 1,3-Propanediol (1.5–2.0 equiv) was added and the mixture was allowed to warm to rt and stirred for an additional 15 min. After recooling to –78 °C, satd aq NH<sub>4</sub>Cl was added and the mixture was warmed to rt. Water (*ca.* 40 mL/mmol) and EtOAc (*ca.* 40 mL/mmol) were added and the mixture was shaken thoroughly in a separatory funnel. The layers were separated and the organic layer was washed with water and brine, dried (MgSO<sub>4</sub>), filtered, and concentrated by rotary evaporation to afford the crude alcohol **11** or **S7–10**, which was dried under high vacuum and used in the next reaction without further purification.

**NOTE:** The reaction proved very sensitive to the quality of reagents, and the use of freshly prepared CeCl<sub>3</sub> solution and a newly opened bottle of NaBH<sub>4</sub> is strongly recommended. Workup with 1,3-propanediol serves to break up boron–oxygen aggregates that may hinder reaction completion and/or are sensitive to reoxidation during workup.

<sup>11</sup> For diastereoselective Luche reductions at low temperatures, see: (a) Haukaas, M. H.; O’Doherty, G. A. *Org. Lett.* **2001**, 3, 401. (b) Guo, H.; O’Doherty, G. A. *Org. Lett.* **2006**, 8, 1609.

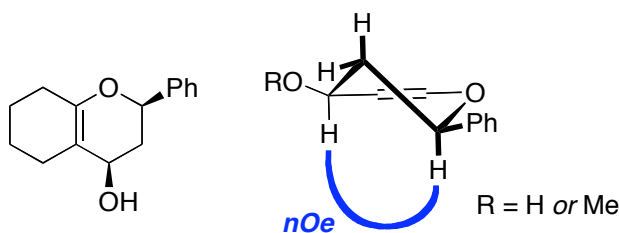

***cis*-2-Phenyl-3,4,5,6,7,8-hexahydro-2*H*-chromen-4-ol (11a).** Synthesized from dihydropyrene **9a** (627 mg, 2.74 mmol). Crude **11a** was obtained as a white solid (635 mg, quant,  $\geq 98:2$  dr).

**TLC:**  $R_f$  0.21 (4:1 hexanes/EtOAc). **IR** (NaCl, film): 3324 (m, br, O–H st), 2927 (s, C–H st), 2857 (m, C–H st), 2841 (m, C–H st), 1681 (m, C=C st), 1496 (w), 1449 (w), 1367 (w), 1340 (w), 1310 (w), 1271 (w), 1226 (m), 1149 (s, C–O/C–OH st), 1068 (m), 1048 (m), 1024 (m), 966 (w), 895 (w) 879 (w).  **$^1\text{H-NMR}$**  (500 MHz):  $\delta$  7.38–7.28 (m, 5H), 4.95 (dd, 1H,  $J = 10.9, 2.2$ ), 4.35–4.33 (m, 1H), 2.41 (ddd, 1H,  $J = 13.4, 6.7, 2.2$ ), 2.28–2.26 (m, 1H), 2.12–2.04 (m, 3H), 1.97–1.93 (m, 1H), 1.78–1.72 (m, 2H), 1.67–1.60 (m, 1H), 1.57–1.52 (m, 1H), 1.22 (d, 1H,  $J = 5.3$ ).  **$^{13}\text{C-NMR}$**  (125 MHz):  $\delta$  149.4, 141.0, 128.5, 127.7, 126.0, 108.0, 75.8, 66.7, 40.4, 27.3, 24.1, 22.8, 22.7. **ESI-MS**  $m/z$  (rel int): (pos) 253.1 ( $[\text{M}+\text{Na}]^+$ , 87), 213.1 ( $[\text{M}-\text{H}_2\text{O}+\text{H}]^+$ ; (neg) 459.4 ( $[\text{2M}-\text{H}]^-$ , 53), 229.0 ( $[\text{M}-\text{H}]^-$ , 15).

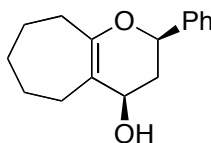

***cis*-2-Phenyl-2,3,4,5,6,7,8,9-octahydrocyclohepta[*b*]pyran-4-ol (11b).** Synthesized from dihydropyrene **9b** (46.6 mg, 0.190 mmol). Crude **11b** was obtained as a white solid (50.0 mg, quant,  $\geq 98:2$  dr).

**TLC:**  $R_f$  0.36 (4:1 hexanes/EtOAc).  **$^1\text{H-NMR}$**  (500 MHz):  $\delta$  7.23–7.19 (m, 4H), 7.16–7.12 (m, 1H), 4.79 (dd, 1H,  $J = 10.5, 2.5$ ), 4.19 (q, 1H,  $J = 7.2$ ), 2.22 (ddd, 1H,  $J = 13.5, 7.2, 2.5$ ), 2.17–2.14 (m, 2H), 2.12–1.99 (m, 2H), 1.93–1.87 (m, 1H), 1.64–1.42 (m, 5H), 1.37–1.31 (m, 1H), 0.93 (d, 1H,  $J = 8.5$ ).  **$^{13}\text{C-NMR}$**  (125 MHz):  $\delta$  155.3, 141.0, 128.5, 127.7, 126.0, 112.3, 75.8, 67.5, 40.0, 33.2, 31.8, 27.9, 27.3, 25.5. **ESI-MS**  $m/z$  (rel int): (pos) 511.3 ( $[\text{2M}+\text{Na}]^+$ , 16), 493.3 ( $[\text{2M}-\text{H}_2\text{O}+\text{Na}]^+$ , 24), 267.1 ( $[\text{M}+\text{Na}]^+$ , 86), 227.1 ( $[\text{M}-\text{H}_2\text{O}+\text{H}]^+$ , 100); (neg) 487.3 ( $[\text{2M}-\text{H}]^-$ , 100), 243.0 ( $[\text{M}-\text{H}]^-$ , 11).

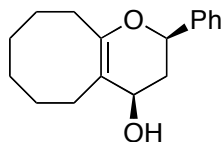

***cis*-2-Phenyl-3,4,5,6,7,8,9,10-octahydro-2*H*-cycloocta[*b*]pyran-4-ol (11c).** Synthesized from dihydropyrene **9c** (51.0 mg, 0.20 mmol). Crude **11c** was obtained as a white solid (43.7 mg, 85%,  $\geq 98:2$  dr).

**TLC:**  $R_f$  0.34 (4:1 hexanes/EtOAc).  **$^1\text{H-NMR}$**  (500 MHz):  $\delta$  7.39–7.35 (m, 4H), 7.31–7.28 (m, 1H), 4.95 (dd, 1H,  $J = 10.6, 2.3$ ), 4.40 (q, 1H,  $J = 7.6$ ), 2.42–2.34 (m, 3H), 2.21–2.15 (m, 2H),

2.12–2.04 (m, 1H), 1.72–1.46 (m, 8H), 1.11 (d, 1H,  $J = 8.3$ ).  $^{13}\text{C-NMR}$  (125 MHz):  $\delta$  152.3, 141.2, 128.6, 127.9, 126.0, 109.7, 76.2, 65.5, 40.5, 30.3, 30.1, 28.9, 26.9, 26.6, 25.3. **ESI-MS**  $m/z$  (rel int): (pos) 281.2 ( $[\text{M}+\text{Na}]^+$ , 100), 521.3 ( $[\text{2M}-\text{H}_2\text{O}+\text{Na}]^+$ , 13).

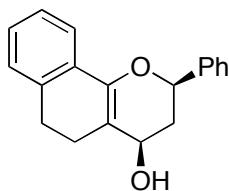

**cis-2-Phenyl-3,4,5,6-tetrahydro-2H-benzo[h]chromen-4-ol (11d)**. Synthesized from dihydropyrone **9d** (970 mg, 3.51 mmol). Crude **11d** was obtained as a white solid (977 mg, quant,  $\geq 98:2$  dr).

**TLC**:  $R_f$  0.27 (4:1 hexanes/EtOAc).  $^1\text{H-NMR}$  (500 MHz):  $\delta$  7.59–7.57 (m, 1H), 7.46 (d, 2H,  $J = 7.3$ ), 7.40 (t, 2H,  $J = 7.3$ ), 7.33 (t, 1H,  $J = 7.3$ ), 7.22–7.18 (m, 2H), 7.16–7.13 (m, 1H), 5.20 (dd, 1H,  $J = 10.5, 2.2$ ), 4.57 (q, 1H,  $J = 8.1$ ), 2.91–2.80 (m, 2H), 2.64–2.53 (m, 2H), 2.34 (dt, 1H,  $J = 15.8, 7.9$ ), 2.19 (ddd, 1H,  $J = 13.5, 10.5, 8.1$ ), 1.27 (d, 1H,  $J = 8.1$ ).  $^{13}\text{C-NMR}$  (125 MHz):  $\delta$  146.3, 141.0, 136.7, 131.1, 128.7, 128.0, 127.9, 127.2, 126.4, 126.0, 122.0, 110.8, 76.1, 66.3, 40.3, 28.3, 22.7. **ESI-MS**  $m/z$  (rel int): (pos) 301.2 ( $[\text{M}+\text{Na}]^+$ , 100), 283.2 ( $[\text{M}-\text{H}_2\text{O}+\text{Na}]^+$ , 76), 261.3 ( $[\text{M}-\text{H}_2\text{O}+\text{H}]^+$ , 64).

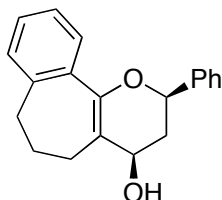

**[8.9]-Benzo-cis-2-phenyl-2,3,4,5,6,7-hexahydrocyclohepta[b]pyran-4-ol (11e)**. Synthesized from dihydropyrone **9e** (210 mg, 0.72 mmol). Crude **11e** was obtained as a white solid (220 mg, quant,  $\geq 98:2$  dr).

**TLC**:  $R_f$  0.33 (4:1 hexanes/EtOAc).  $^1\text{H-NMR}$  (500 MHz):  $\delta$  7.54–7.52 (m, 1H), 7.45 (d, 2H,  $J = 7.6$ ), 7.38 (t, 2H,  $J = 7.6$ ), 7.33–7.21 (m, 7H), 5.20 (dd, 1H,  $J = 10.7, 1.9$ ), 4.60 (q, 1H,  $J = 7.8$ ), 2.76–2.72 (m, 1H), 2.68–2.63 (m, 1H), 2.54 (ddd, 1H,  $J = 13.5, 6.7, 1.9$ ), 2.26–2.10 (m, 4H), 1.91–1.87 (m, 1H).  $^{13}\text{C-NMR}$  (125 MHz):  $\delta$  148.5, 141.4, 140.9, 136.1, 129.1, 128.7, 128.5, 128.4, 128.0, 127.1, 126.2, 126.2, 113.9, 76.8, 67.9, 35.5, 32.7, 24.8. **ESI-MS**  $m/z$  (rel int): (pos) 607.5 ( $[\text{2M}+\text{Na}]^+$ , 5), 315.3 ( $[\text{M}+\text{Na}]^+$ , 46).

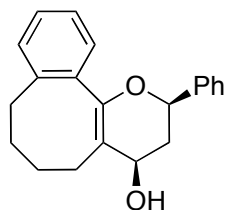

**[9.10]-Benzo-*cis*-2-Phenyl-3,4,5,6,7,8,-hexahydro-2H-cycloocta[*b*]pyran-4-ol (11f).** Synthesized from dihydropyrone **9f** (100 mg, 0.330 mmol). Crude **11f** was obtained as a white solid (95.0 mg, 94%,  $\geq 98:2$  dr, see below).

The  $^1\text{H}$ - and  $^{13}\text{C}$ -NMR spectra of **11f** exhibit two sets of signals at rt (variable ratio in crude product), presumed to arise from atropisomers that do not interconvert rapidly on the NMR timescale at rt. The signals converge to a single set of peaks at higher temperatures in NMR experiments in toluene- $d_8$ , and the diastereoselectivity is, thus, assumed to be  $\geq 98:2$  dr.

Both sets of  $^1\text{H}$ - and  $^{13}\text{C}$ -NMR signals at 25 °C are reported below as assignment to individual atropisomers was not possible for all peaks.  $^1\text{H}$ -NMR integrals are normalized using the benzylic proton of the minor isomer as standard for 1H and are reported to one decimal place.

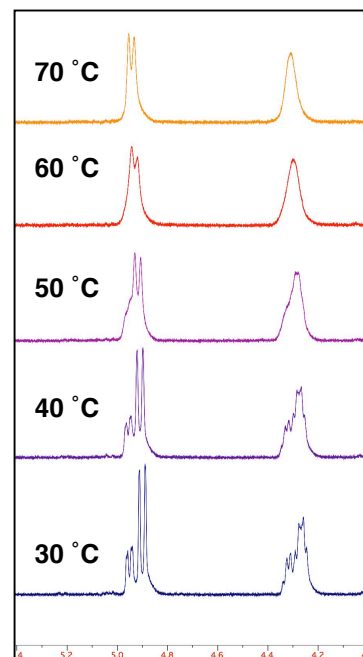

$^1\text{H}$ -NMR signals of **11f** in toluene- $d_8$  at various temperatures.

**TLC:**  $R_f$  0.16 (10:1 hexanes/EtOAc).  **$^1\text{H}$ -NMR** (500 MHz):  $\delta$  7.56 (d, 1.1H,  $J = 7.2$ ), 7.49 (d, 2.1H,  $J = 7.6$ ), 7.47–7.34 (m, 9.7H), 7.31–7.22 (m, 9.6H), 7.17 (t, 1.3H,  $J = 7.3$ ), 5.31 (dd, 1.0H,  $J = 7.7, 3.6$ ), 5.20 (dd, 1.4H,  $J = 11.5, 1.6$ ), 4.65 (q, 1.4H,  $J = 8.2$ ), 4.53 (q, 1.0H,  $J = 7.5$ ), 2.87–2.77 (m, 3.9H), 2.65 (t, 1.1H,  $J = 12.2$ ), 2.56–2.39 (m, 4.6H), 2.31 (dd, 1.4H,  $J = 13.7, 8.2$ ), 2.27–2.20 (m, 1.4H), 2.10–2.05 (m, 2.4H), 1.83–1.78 (m, 1.5H), 1.75–1.57 (m, 4.1H), 1.52–1.29 (m, 5.9H), 1.09 (d, 0.9H,  $J = 9.3$ ).  **$^{13}\text{C}$ -NMR** (150 MHz, DMSO- $d_6$ ):  $\delta$  147.1, 146.8, 142.2, 141.7, 141.6, 141.3, 135.3, 134.3, 129.2, 129.1, 128.6, 128.5, 128.3, 127.6, 127.5, 127.2, 126.1, 125.9, 125.4, 125.1, 115.3, 114.7, 77.1, 76.0, 67.8, 62.4, 40.6, 40.4, 33.0, 32.4, 29.2, 29.0, 28.5, 25.3, 24.5, 23.6. **ESI-MS**  $m/z$  (rel int): (pos) 329.4 ( $[\text{M}+\text{Na}]^+$ , 100), 289.3 ( $[\text{M}-\text{H}_2\text{O}]^+$ , 57), 305.4 ( $[\text{M}-\text{H}]^-$ , 20).



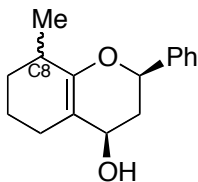

**(2R\*,4R\*,8RS)-8-Methyl-2-phenyl-3,4,5,6,7,8-hexahydro-2H-chromen-4-ol (S7).** Synthesized from dihydropyrone **S3** (50 mg, 0.21 mmol). Crude **S7** was obtained as a white solid (50 mg, quant., 1.3:1.0 dr at C8).

**TLC:**  $R_f$  0.21 (4:1 hexanes/EtOAc). **<sup>1</sup>H-NMR** (500 MHz):  $\delta$  7.38–7.34 (m, 4H-major, 4H-minor), 7.31–7.27 (m, 1H-major, 1H-minor), 4.91 (ddd, 1H-major, 1H-minor,  $J = 11.2, 5.7, 2.3$ ), 4.37 (dq, 1H-major, 1H-minor,  $J = 23.0, 7.6$ ), 2.41 (dddd, 1H-major, 1H-minor,  $J = 18.2, 13.4, 6.8, 2.2$ ), 2.35–2.23 (m, 2H-major, 2H-minor), 2.06 (ddd, 1H-major,  $J = 13.3, 10.9, 8.6$ ), 1.98–1.91 (m, 1H-major, 2H-minor), 1.87–1.72 (m, 2H-major, 1H-minor), 1.69–1.60 (m, 1H-major, 1H-minor), 1.53–1.46 (m, 1H-major, 1H-minor), 1.34 (dddd, 1H-minor,  $J = 12.9, 11.0, 8.4, 2.6$ ), 1.27 (d, 1H-major,  $J = 7.6$ ), 1.22 (d, 1H-minor,  $J = 7.8$ ), 1.15 (d, 3H-major,  $J = 6.8$ ), 1.09 (d, 3H-minor,  $J = 7.0$ ). **<sup>13</sup>C-NMR** (125 MHz):  $\delta$  153.1, 152.9, 141.6, 141.2, 129.0, 128.5, 127.7, 127.6, 126.0, 125.8, 107.7, 107.6, 75.7, 75.6, 67.2, 66.9, 41.1, 40.3, 32.5, 32.1, 31.2, 30.7, 24.9, 24.7, 21.3, 19.2, 18.8, 18.7. **ESI-MS**  $m/z$  (rel int): (pos) 227.1 ( $[M-H_2O+H]^+$ , 100), 511.5 ( $[2M+Na]^+$ , 10).

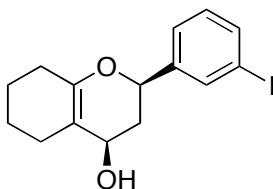

**cis-2-(3-Iodophenyl)-3,4,5,6,7,8-hexahydro-2H-chromen-4-ol (S8).** Synthesized from dihydropyrone **S4** (425 mg, 1.20 mmol). Crude **S8** was obtained as a white solid (419 mg, 99%,  $\geq 98:2$  dr).

**TLC:**  $R_f$  0.32 (4:1 hexanes/EtOAc). **<sup>1</sup>H-NMR** (500 MHz):  $\delta$  7.73 (s, 1H), 7.63 (d, 1H,  $J = 7.8$ ), 7.32 (d, 1H,  $J = 7.8$ ), 7.09 (t, 1H,  $J = 7.8$ ), 4.87 (dd, 1H,  $J = 11.2, 2.0$ ), 4.36 (q, 1H,  $J = 7.4$ ), 2.39 (ddd, 1H,  $J = 13.3, 6.7, 2.1$ ), 2.30–2.24 (m, 1H), 2.15–1.92 (m, 4H), 1.78–1.72 (m, 2H), 1.65–1.59 (m, 1H), 1.56–1.51 (m, 1H), 1.23 (d, 1H,  $J = 7.4$ ). **<sup>13</sup>C-NMR** (125 MHz):  $\delta$  149.4, 143.6, 137.0, 135.2, 130.4, 125.4, 108.4, 94.6, 75.2, 66.7, 40.7, 27.4, 24.2, 22.9, 22.8(5). **ESI-MS**  $m/z$  (rel int): (pos) 395.2 ( $[M+K]^+$ , 80), 379.2 ( $[M+Na]^+$ , 47).

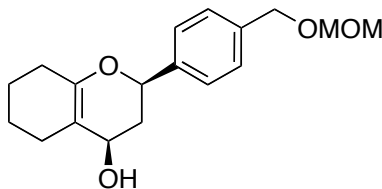

**cis-2-(4-((tert-Butyldiphenylsilyloxy)methyl)phenyl)-3,4,5,6,7,8-hexahydro-2H-chromen-4-ol (S9).** Synthesized from dihydropyrone **S5** (104 mg, 0.344 mmol). Crude **S9** was obtained as a white solid (102 mg, 98%,  $\geq 98:2$  dr).

**TLC:**  $R_f$  0.41 (4:1 hexanes/EtOAc).  **$^1\text{H-NMR}$**  (500 MHz):  $\delta$  7.40–7.33 (m, 4H), 4.95 (dd, 1H,  $J = 10.9, 2.3$ ), 4.73–4.68 (m, 2H), 4.63–4.57 (m, 2H), 4.34 (t, 1H,  $J = 7.1$ ), 3.41 (s, 3H), 2.39 (ddd, 1H,  $J = 13.4, 7.1, 2.3$ ), 2.30–2.24 (m, 1H), 2.15–2.03 (m, 3H), 1.97–1.92 (m, 1H), 1.77–1.70 (m, 2H), 1.67–1.59 (m, 1H), 1.57–1.49 (m, 1H).  **$^{13}\text{C-NMR}$**  (125 MHz):  $\delta$  149.5, 140.7, 137.6, 128.2, 126.3, 108.3, 95.8, 75.7, 69.0, 66.8, 55.5, 40.5, 27.5, 24.3, 22.9, 22.9. **ESI-MS**  $m/z$  (rel int): (neg) 607.2 ( $[\text{2M-H}]^-$ , 100); (pos) 327.0 ( $[\text{M+Na}]^+$ , 100).

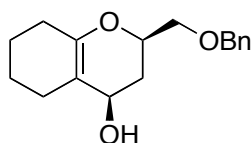

***cis*-2-(Benzyloxymethyl)-3,4,5,6,7,8-hexahydro-2H-chromen-4-ol (S10).** Synthesized from dihydropyridone **S6** (45.0 mg, 0.165 mmol). Crude **S10** was obtained as colorless oil (45.0 mg, quant, 90:10 dr).

**TLC:**  $R_f$  0.18 (4:1 hexanes/EtOAc).  **$^1\text{H-NMR}$**  (500 MHz):  $\delta$  7.36–7.26 (m, 5H), 4.60–4.56 (m, 2H), 4.13 (m, 2H), 3.64 (dd, 1H,  $J = 10.4, 5.5$ ), 3.57 (dd, 1H,  $J = 10.4, 4.2$ ), 2.28–2.03 (m, 4H), 1.90–1.86 (m, 1H), 1.79 (ddd, 1H,  $J = 13.5, 9.1, 7.5$ ), 1.71–1.50 (m, 4H).  **$^{13}\text{C-NMR}$**  (125 MHz):  $\delta$  148.7, 138.1, 128.4, 127.7 (presumably 2 carbons overlapping), 107.6, 73.5, 72.7, 72.4, 65.2, 35.0, 27.4, 24.5, 22.9, 22.8. **ESI-MS**  $m/z$  (rel int): (pos) 297.0 ( $[\text{M+Na}]^+$ , 100), 279.1 ( $[\text{M-H}_2\text{O+Na}]^+$ , 25), 257.0 ( $[\text{M-H}_2\text{O+H}]^+$ , 45); (neg) 273.3 ( $[\text{M-H}]^-$ , 65).

## 2. DIASTEREOSELECTIVE REDUCTION OF DIHYDROPYRIDONES (**10**)

### *General protocol for Super-Hydrate reduction*

In a roundbottom flask, dihydropyridone **10** was dissolved in toluene (0.20 M solution) and cooled to  $-78\text{ }^\circ\text{C}$ . A solution of  $\text{LiEt}_3\text{BH}$  (1.0 M in THF, 1.50 equiv) was added dropwise and the resulting solution was allowed to stir at  $-78\text{ }^\circ\text{C}$  until the reaction was complete as judged by TLC analysis (*ca.* 40 min). The reaction was quenched with satd aq  $\text{NH}_4\text{Cl}$  at  $-78\text{ }^\circ\text{C}$ , allowed to warm to rt, and extracted with EtOAc (3 $\times$ ). The combined organic extracts were concentrated by rotary evaporation. The crude product was dissolved in THF (1.0 mL/80 mg) at rt and an equal volume of 1 N NaOH was added to the solution. The mixture was stirred at rt for 10 min, after which the solution was diluted with satd aq  $\text{NH}_4\text{Cl}$  and extracted with EtOAc (3 $\times$ ). The combined organic extracts were washed with brine, dried ( $\text{MgSO}_4$ ), and concentrated by rotary evaporation to afford crude alcohol **12**, which was used in the next reaction without further purification.

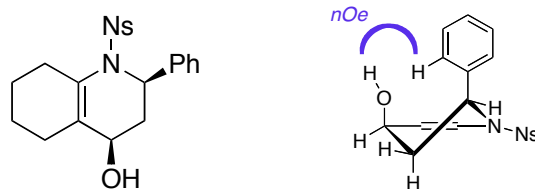

**cis-1-(2-Nitrophenylsulfonyl)-2-phenyl-1,2,3,4,5,6,7,8-octahydroquinolin-4-ol (12a).** Synthesized from dihydropyridone **10a** (80.0 mg, 0.194 mmol). Crude **12a** was obtained as a light yellow foam (71.5 mg, 89%,  $\geq 98:2$  dr).

**TLC:**  $R_f$  0.38 (2:1 EtOAc/hexanes). **IR** (NaCl, film): 3442 (s, br, O–H st), 3092 (w), 3064 (w), 3029 (w), 2934 (m, C–H st), 2856 (m, C–H st), 1662 (w), 1544 (vs, N=O st), 1496 (w), 1449 (m), 1439 (m), 1372 (s, S=O st), 1170 (s, S=O st), 1090 (w), 1053 (m), 985 (w), 952 (w), 909 (w), 851 (w), 739 (m), 729 (m), 699 (m).  **$^1\text{H-NMR}$**  (500 MHz):  $\delta$  8.02 (dd, 1H,  $J = 7.7, 1.6$ ), 7.72–7.63 (m, 3H), 7.35–7.26 (m, 5H), 5.59 (t, 1H,  $J = 3.8$ ), 3.67–3.64 (m, 1H), 2.86–2.80 (m, 1H), 2.52 (ddd, 1H,  $J = 14.8, 3.8, 2.5$ ), 2.41–2.37 (m, 1H), 2.32–2.21 (m, 2H), 2.00–1.96 (m, 1H), 1.85–1.80 (m, 1H), 1.66 (td, 2H,  $J = 8.2, 4.1$ ), 1.57–1.53 (m, 1H), 0.69 (d, 1H,  $J = 10.2$ ).  **$^{13}\text{C-NMR}$**  (125 MHz):  $\delta$  148.0, 139.3, 133.8, 133.8, 131.8, 130.8, 130.3, 128.8, 128.0, 127.9, 127.3, 126.3, 124.5, 65.1, 56.0, 37.6, 30.2, 26.7, 23.6, 22.0. **ESI-MS**  $m/z$  (rel int): (pos) 297 ( $[\text{M}+\text{H}]^+$ , 100), 319 ( $[\text{M}+\text{Na}]^+$ , 20); (neg) 295 ( $[\text{M}-\text{H}]^-$ , 100).

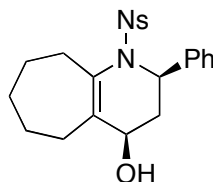

**cis-1-(2-Nitrophenylsulfonyl)-2-phenyl-1,2,3,4,5,6,7,8,9-nonahydroquinolin-4-ol (12b).** Synthesized from dihydropyridone **10b** (118 mg, 0.277 mmol). Crude **12b** was obtained as a light yellow foam (104 mg, 88%,  $\geq 98:2$  dr).

**TLC:**  $R_f$  0.40 (2:1 EtOAc/hexanes).  **$^1\text{H-NMR}$**  (500 MHz):  $\delta$  8.05 (dd, 1H,  $J = 7.8, 1.4$ ), 7.74–7.65 (m, 3H), 7.38–7.31 (m, 4H), 7.25–7.22 (m, 1H), 5.51 (dd, 1H,  $J = 5.3, 3.0$ ), 3.71 (dd, 1H,  $J = 10.3, 5.8$ ), 2.76–2.56 (m, 3H), 2.38 (ddd, 1H,  $J = 15.1, 8.0, 1.8$ ), 2.21–2.10 (m, 2H), 1.90–1.83 (m, 1H), 1.78–1.69 (m, 1H), 1.68–1.56 (m, 2H), 1.51–1.42 (m, 2H), 0.65 (d, 1H,  $J = 10.3$ ).  **$^{13}\text{C-NMR}$**  (125 MHz):  $\delta$  148.1, 138.7, 135.2, 133.9, 133.8, 133.7, 131.7, 130.9, 128.7, 127.3, 126.5, 124.5, 65.5, 55.0, 36.7, 34.7, 32.0, 30.5, 26.5, 25.4. **ESI-MS**  $m/z$  (rel int): (pos) 411 ( $[\text{M}-\text{H}_2\text{O}+\text{H}]^+$ , 25), 450 ( $[\text{M}+\text{Na}]^+$ , 100).

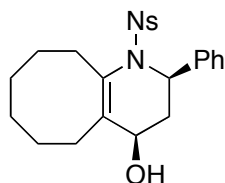

**cis-1-(2-Nitrophenylsulfonyl)-2-phenyl-1,2,3,4,5,6,7,8-octahydroquinolin-4-ol (12c).** Synthesized from dihydropyridone **10c** (95.0 mg, 0.216 mmol). Crude **12c** was obtained as a light yellow foam (83.2 mg, 87%,  $\geq 98:2$  dr).

**TLC:**  $R_f$  0.43 (2:1 EtOAc/hexanes).  **$^1\text{H-NMR}$**  (500 MHz):  $\delta$  8.00 (dd, 1H,  $J = 7.8, 1.3$ ), 7.73–7.63 (m, 3H), 7.41 (d, 2H,  $J = 7.9$ ), 7.32 (t, 2H,  $J = 7.7$ ), 7.24 (t, 1H,  $J = 6.6$ ), 5.56 (t, 1H,  $J = 5.4$ ), 3.78–3.74 (m, 1H), 2.92–2.86 (m, 1H), 2.59 (ddt, 1H,  $J = 12.2, 8.3, 4.0$ ), 2.49 (dt, 1H,  $J = 14.4, 4.4$ ), 2.43–2.33 (m, 2H), 2.24 (dddd, 1H,  $J = 13.6, 8.2, 4.7, 3.5$ ), 1.74–1.61 (m, 3H), 1.52–1.36 (m, 4H), 1.21–1.15 (m, 1H), 1.00 (d, 1H,  $J = 8.9$ ).  **$^{13}\text{C-NMR}$**  (125 MHz):  $\delta$  148.1, 139.5, 133.9, 132.5, 132.2, 131.5, 130.8, 128.6, 128.1, 127.4, 126.8, 124.3, 65.1, 55.8, 38.0, 30.5, 30.1, 29.0, 28.0, 26.2, 26.1. **ESI-MS**  $m/z$  (rel int): (pos) 425 ( $[\text{M}-\text{H}_2\text{O}+\text{H}]^+$ , 10), 465 ( $[\text{M}+\text{Na}]^+$ , 100).

### 3. TBS PROTECTION OF ALCOHOLS (13, 14, S11–15)

#### General protocol for TBS protection

The crude alcohol **11**, **12**, or **S7–10** was placed in a roundbottom flask. In a separate flask, *tert*-butyldimethylchlorosilane (TBSCl, 1.2 equiv) and imidazole (2.5 equiv) were dissolved in DMF (*ca.* 3.00 mL/mmol alcohol). The resulting solution was added to the alcohol flask and the mixture was stirred at 50 °C (unless otherwise noted) until full conversion as judged by TLC (aliquots quenched with satd aq  $\text{NaHCO}_3$ , extracted with EtOAc). The mixture was cooled to rt and satd aq  $\text{NaHCO}_3$  was added with stirring. After stirring for at least 10 min at rt, EtOAc was added, the layers were separated, and the aqueous layer was extracted with EtOAc (2 $\times$ ). The combined organic extracts were washed with water and brine, dried ( $\text{MgSO}_4$ ), filtered, and concentrated by rotary evaporation. Purification by silica flash chromatography (hexanes/EtOAc, 0.5 vol%  $\text{Et}_3\text{N}$ ) afforded the TBS-protected alcohol **13**, **14**, or **S11–15**.

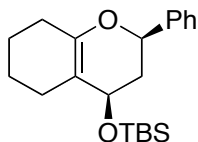

***tert*-Butyldimethyl-(*cis*-2-phenyl-3,4,5,6,7,8-hexahydro-2H-chromen-4-yloxy) silane (13a).** Synthesized from crude alcohol **11a** (633 mg, 2.75 mmol) and TBSCl (497 mg, 3.30 mmol). Purification by silica flash chromatography (99:1 hexanes/EtOAc, 0.5 vol%  $\text{Et}_3\text{N}$ ) afforded **13a** as a colorless solid (875 mg, 92%).

**TLC:**  $R_f$  0.73 (10:1 hexanes/EtOAc). **mp** 61.1–63.4 °C. **IR** (NaCl, film): 2950 (s, C–H st), 2929 (s, C–H st), 2888 (m, C–H st), 2856 (s, C–H st), 1684 (m, C=C st), 1472 (w), 1380 (m), 1254 (s, Si–Me  $\delta$  sy), 1228 (m), 1176 (s), 1087 (vs, Si–O st), 1065 (vs, Si–O st), 1008 (m), 971 (w), 904 (m), 835 (vs, Si–C st), 774 (s, Si–C st), 759 (m), 698 (m).  **$^1\text{H-NMR}$**  (500 MHz):  $\delta$  7.35 (m, 4H), 7.29–7.26 (m, 1H), 4.84 (dd, 1H,  $J = 12.3, 1.4$ ), 4.48–4.45 (m, 1H), 2.29–2.15 (m, 2H), 2.11–1.97 (m, 3H), 1.85–1.79 (m, 1H), 1.76–1.68 (m, 2H), 1.68–1.43 (m, 2H), 0.87 (s, 9H), 0.08 (s, 3H), 0.04 (s, 3H).  **$^{13}\text{C-NMR}$**  (125 MHz):  $\delta$  149.2, 141.6, 128.7, 128.0, 126.4, 108.7, 76.5, 67.8, 41.5, 27.6, 26.0, 24.6, 23.0, 22.9, 18.4, –4.1, –4.6. **ESI-MS**  $m/z$  (rel int): (pos) 467.0 ( $[\text{M}+\text{Na}]^+$ , 100).

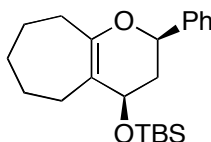

**tert-Butyldimethyl(cis-2-phenyl-2,3,4,5,6,7,8,9-octahydrocyclohepta[b]pyran-4-yloxy)-silane (13b).** Synthesized from crude alcohol **11b** (341 mg, 1.40 mmol) and TBSCl (253 mg, 1.68 mmol). Purification by silica flash chromatography (99:1 hexanes/EtOAc, 0.5 vol% Et<sub>3</sub>N) afforded **13b** as a colorless oil (414 mg, 81%).

**TLC:** *R<sub>f</sub>* 0.82 (10:1 hexanes/EtOAc). **IR** (NaCl, film): 2951 (s, C–H st), 2926 (s, C–H st), 2854 (s, C–H st), 1676 (m, C=C st), 1472 (w), 1446 (w), 1379 (w), 1361 (w), 1247 (s, Si–Me δ sy), 1172 (s, C–O/Si–O st), 1151 (s, C–O/Si–O st), 1154 (m, C–O/Si–O st), 1100 (s, C–O/Si–O st), 987 (m), 965 (m), 938 (m), 899 (m), 858 (m), 836 (vs, Si–C st), 774 (s, Si–C st), 757 (m), 697 (m). **<sup>1</sup>H-NMR** (500 MHz): δ 7.42–7.37 (m, 4H), 7.32 (m, 1H), 4.84 (dd, 1H, *J* = 12.4, 1.9), 4.52 (t, 1H, *J* = 8.8), 2.31–2.16 (m, 4H), 2.09 (ddd, 1H, *J* = 15.0, 8.1, 2.7), 2.01 (ddd, 1H, *J* = 13.1, 12.4, 8.8), 1.82–1.53 (m, 6H), 0.91 (s, 9H), 0.12 (s, 3H), 0.08 (s, 3H). **<sup>13</sup>C-NMR** (125 MHz): δ 155.0, 141.6, 128.6, 127.9, 126.4, 112.8, 76.7, 68.3, 41.1, 33.3, 32.0, 27.6, 27.2, 26.0, 25.7, 18.3, –3.9, –4.7. **ESI-MS** *m/z* (rel int): (pos) 381.2 ([M+Na]<sup>+</sup>, 100), 227 ([M–TBSOH+H]<sup>+</sup>, 70).

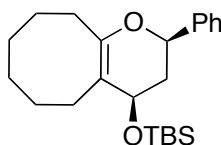

**tert-Butyldimethyl(cis-2-phenyl-3,4,5,6,7,8,9,10-octahydro-2H-cycloocta[b]pyran-4-yloxy)-silane (13c).** Synthesized from crude alcohol **11c** (225 mg, 0.870 mmol) and TBSCl (158 mg, 1.00 mmol). Purification by silica flash chromatography (99:1 hexanes/EtOAc, 0.5 vol% Et<sub>3</sub>N) afforded **13c** as a colorless solid (298 mg, 92%).

**TLC:** *R<sub>f</sub>* 0.83 (10:1 hexanes/EtOAc). **mp** = 39.1–41.2 °C. **IR** (NaCl, film): 2952 (s, C–H st), 2927 (vs, C–H st), 2854 (s, C–H st), 1673 (m, C=C st), 1496 (w), 1463 (m), 1362 (m), 1254 (s, Si–Me δ sy), 1181 (m), 1167 (m, C–O/Si–O st), 1128 (m, C–O/Si–O st), 1074 (vs, br, C–O/Si–O st), 953 (m), 930 (m), 886 (m), 836 (s, Si–C st), 782 (m), 755 (m), 697 (m). **<sup>1</sup>H-NMR** (500 MHz): δ 7.40–7.28 (m, 5H), 4.84 (dd, 1H, *J* = 12.3, 1.8), 4.55 (dd, 1H, *J* = 9.5, 6.9), 2.39–2.32 (m, 2H), 2.23–2.12 (m, 3H), 2.09–2.02 (m, 1H), 1.71–1.41 (m, 8H), 0.90 (s, 9H), 0.11 (s, 3H), 0.07 (s, 3H). **<sup>13</sup>C-NMR** (125 MHz): δ 152.0, 141.8, 128.6, 127.9, 126.3, 109.8, 76.8, 66.2, 41.4, 30.5, 29.8, 29.0, 27.1, 26.7, 26.0, 24.7, 18.3, –4.2, –4.7. **ESI-MS** *m/z* (rel int): (pos) 395.3 ([M+Na]<sup>+</sup>, 100), 241.1 ([M–TBSOH+H]<sup>+</sup>, 47).

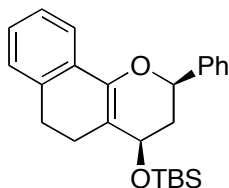

**tert-Butyldimethyl(cis-2-phenyl-3,4,5,6-tetrahydro-2H-benzo[h]chromen-4-yloxy)silane (13d).** Synthesized from crude alcohol **11d** (975 mg, 3.51 mmol) and TBSCl (633 mg, 4.20 mmol). Purification by silica flash chromatography (99:1 hexanes/EtOAc, 0.5 vol% Et<sub>3</sub>N) afforded **13d** as a colorless solid (1.18 g, 86%).

**TLC:**  $R_f$  0.74 (10:1 hexanes/EtOAc). **mp** = 107.9–110.9 °C. **IR** (NaCl, film): 2954 (s, C–H st), 2928 (s, C–H st), 2887 (m, C–H st), 2856 (s, C–H st), 1656 (m, C=C st), 1493 (w), 1470 (w), 1457 (w), 1360 (m), 1355 (m), 1290 (m), 1254 (m, Si–Me  $\delta$  sy), 1150 (m), 1095 (vs, C–O/Si–O st), 1067 (s, C–O/Si–O st), 958 (m), 897 (m), 836 (vs, Si–C st), 763 (m, Si–C st), 733 (w), 698 (m). **<sup>1</sup>H-NMR** (500 MHz):  $\delta$  7.52–7.47 (m, 3H), 7.41 (t, 2H,  $J = 7.4$ ), 7.34 (t, 1H,  $J = 7.4$ ), 7.16–7.10 (m, 3H), 5.06 (dd, 1H,  $J = 12.5, 1.6$ ), 4.72 (t, 1H,  $J = 8.1$ ), 2.83 (t, 2H,  $J = 8.0$ ), 2.56 (dt, 1H,  $J = 16.0, 8.0$ ), 2.32 (ddd, 1H,  $J = 13.0, 6.8, 1.6$ ), 2.23 (dt, 1H,  $J = 16.0, 8.0$ ), 2.13 (td, 1H,  $J = 12.5, 9.5$ ), 0.91 (s, 9H), 0.14 (s, 3H), 0.09 (s, 3H). **<sup>13</sup>C-NMR** (125 MHz):  $\delta$  146.1, 141.6, 136.4, 131.5, 128.6, 128.0, 127.5, 127.0, 126.3, 121.8, 111.5, 76.7, 67.2, 41.2, 28.2, 26.0, 22.8, 18.3, –4.0, –4.6. **ESI-MS**  $m/z$  (rel int): (pos) 415.2 ([M+Na]<sup>+</sup>, 100), 261.0 ([M–TBSOH+H]<sup>+</sup>, 83).

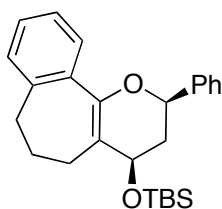

**tert-Butyldimethyl([8.9]-benzo-cis-2-phenyl-2,3,4,5,6,7-hexahydrocyclohepta[b]pyran-4-yl-oxy)silane (13e).** Synthesized from crude alcohol **11e** (200 mg, 0.680 mmol) and TBSCl (124 mg, 0.820 mmol). Purification by silica flash chromatography (99:1 hexanes/EtOAc, 0.5 vol% Et<sub>3</sub>N) afforded **13e** as a colorless oil that solidified upon storage at –20 °C (217 mg, 77%).

**TLC:**  $R_f$  0.76 (10:1 hexanes/EtOAc). **mp** = 113.7–116.5 °C. **IR** (NaCl, film): 2951 (m, C–H st), 2929 (m, C–H st), 2855 (m, C–H st), 1651 (w, C=C st), 1455 (w), 1361 (m), 1348 (m), 1283 (m), 1251 (m, Si–Me  $\delta$  sy), 1134 (m), 1090 (m, C–O/Si–O st), 1061 (vs, C–O/Si–O st), 1009 (w), 978 (w), 931 (m), 897 (m), 836 (vs, Si–C st), 768 (s, Si–C st), 698 (m). **<sup>1</sup>H-NMR** (500 MHz):  $\delta$  7.49–7.45 (m, 3H), 7.38 (t, 2H,  $J = 7.4$ ), 7.32 (t, 1H,  $J = 7.4$ ), 7.24–7.21 (m, 3H), 5.11 (dd, 1H,  $J = 12.1, 1.6$ ), 4.70 (dd, 1H,  $J = 9.4, 7.0$ ), 2.81 (ddd, 1H,  $J = 12.9, 11.2, 7.8$ ), 2.62 (ddd, 1H,  $J = 12.9, 6.5, 2.6$ ), 2.32 (ddd, 1H,  $J = 13.1, 7.0, 1.6$ ), 2.28–2.17 (m, 2H), 2.12–2.02 (m, 2H), 1.77 (td, 1H,  $J = 12.6, 6.8$ ), 0.94 (s, 9H), 0.15 (s, 3H), 0.12 (s, 3H). **<sup>13</sup>C-NMR** (125 MHz):  $\delta$  148.5, 141.6, 141.4, 136.5, 129.0, 128.6, 128.0, 128.0, 127.1, 126.4, 126.0, 114.5, 77.2, 68.5, 41.2, 35.3, 32.7, 26.0, 24.8, 18.2, –3.9, –4.6. **ESI-MS**  $m/z$  (rel int): (pos) 429.4 ([M+Na]<sup>+</sup>, 45), 297.3 ([M–TBSOH+Na]<sup>+</sup>, 100), 275.3 ([M–TBSOH+H]<sup>+</sup>, 30).

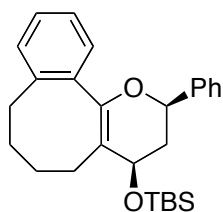

**tert-Butyldimethyl(9.10)-benzo-cis-2-phenyl-3,4,5,6,7,8,-hexahydro-2H-cycloocta[b]pyran-4-yloxy)silane (13f).** Synthesized from crude alcohol **11f** (49.5 mg, 0.160 mmol) and TBSCl (29.3 mg, 0.194 mmol). Purification by silica flash chromatography (99:1 hexanes/EtOAc, 0.5 vol% Et<sub>3</sub>N) afforded **13f** as a colorless solid (53.7 mg, 80%).

The <sup>1</sup>H- and <sup>13</sup>C-NMR spectra of **13f** exhibit two sets of signals at rt (variable ratio in crude product), presumed to arise from atropisomers that do not interconvert rapidly on the NMR timescale at rt. The signals converge to a single set of peaks at higher temperatures in NMR experiments in toluene-*d*<sub>8</sub>.

Both sets of <sup>1</sup>H- and <sup>13</sup>C-NMR signals at 25 °C are reported below as assignment to individual atropisomers was not possible for all peaks. <sup>1</sup>H-NMR integrals are normalized using the benzylic proton of the minor isomer as standard for 1H and are reported to one decimal place.

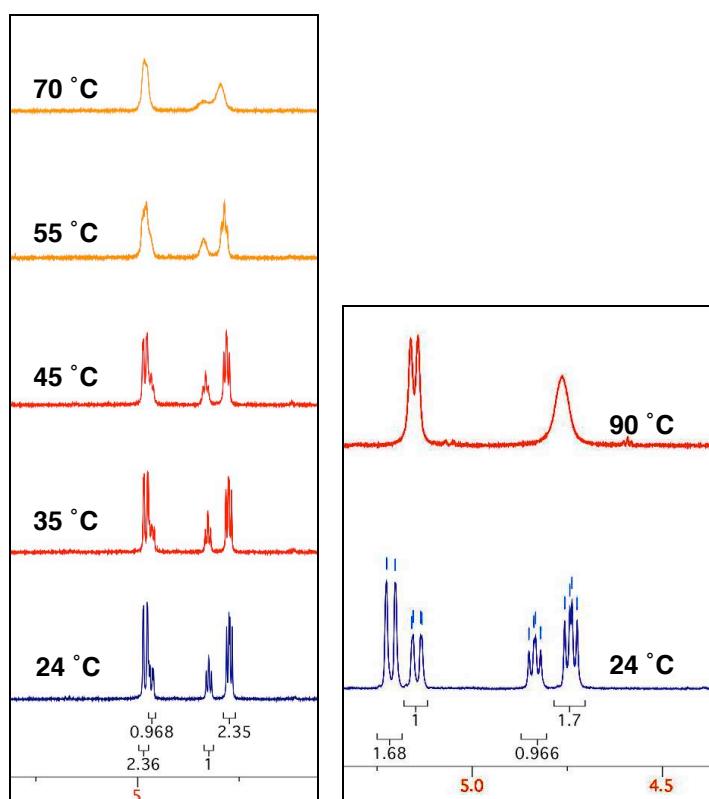

<sup>1</sup>H-NMR signals of **13f** in toluene-*d*<sub>8</sub> (left) and DMSO-*d*<sub>6</sub> (right) at various temperatures.

**TLC:** *R*<sub>f</sub> 0.16 (10:1 hexanes/EtOAc). **mp** = 104.1–106.3 °C. **IR** (NaCl, film): 3063 (w), 3030 (w), 2953 (m, C–H st), 2928 (s, C–H st), 2856 (m, C–H st), 1663 (w, C=C st), 1452 (w), 1362

(w), 1281 (w), 1256 (m, Si-Me  $\delta$  sy), 1177 (w), 1149 (w), 1126 (m), 1093 (m), 1069 (s), 1031 (w), 1007 (w), 953 (m), 900 (m), 838 (s, Si-C st), 761 (m), 699 (m).  **$^1\text{H-NMR}$**  (500 MHz, DMSO- $d_6$ ):  $\delta$  7.46–7.13 (m, 25.1H), 5.21 (d, 1.7H,  $J = 11.7$ ), 5.15 (dd, 1.0H,  $J = 11.5, 1.9$ ), 4.84 (dd, 1.0H,  $J = 8.8, 6.7$ ), 4.74 (dd, 1.7H,  $J = 9.6, 6.8$ ), 2.79 (m, 2.7H), 2.66–2.59 (m, 2.7H), 2.45 (dd, 1.1H,  $J = 13.8, 8.2$ ), 2.28 (m, 2.8H), 2.17 (dd, 1.8H,  $J = 13.6, 7.6$ ), 2.08–1.98 (m, 5.6H), 1.71–1.59 (m, 4.4H), 1.41–1.13 (m, 7.4H), 0.89 (s, 15.4H), 0.83 (s, 9.5H), 0.12 (s, 4.9H), 0.11 (s, 5.2H), 0.09 (s, 3.0H), 0.07 (s, 2.9H).  **$^{13}\text{C-NMR}$**  (125 MHz, DMSO- $d_6$ ):  $\delta$  147.8, 147.3, 142.1, 141.7, 141.4, 141.0, 135.1, 134.1, 129.3, 129.1, 128.8, 128.5, 128.4, 128.3, 128.3, 127.8, 127.6, 127.2, 126.2, 126.0, 125.4, 125.2, 114.0, 113.4, 76.9, 75.6, 69.6, 64.2, 40.7, 40.2, 32.9, 32.6, 29.1, 30.0, 28.3, 26.0, 25.8, 25.7, 24.4, 23.6, 17.7, -4.4, -4.5, -4.9, -5.1 (41 of 42 possible signals were observed). **ESI-MS**  $m/z$  (rel int): (pos) 443.1 ( $[\text{M}+\text{Na}]^+$ , 72), 289 ( $[\text{M}-\text{TBSOH}+\text{H}]^+$ , 100).

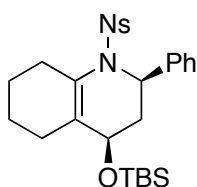

**cis-4-(tert-Butyldimethylsilyloxy)-1-(2-nitrophenylsulfonyl)-2-phenyl-1,2,3,4,5,6,7,8-octahydroquinoline (14a)**. Synthesized from crude alcohol **12a** (71.5 mg, 0.173 mmol) and TBSCl (58.2 mg, 0.386 mmol). Purification by silica flash chromatography (6:1 hexanes/EtOAc, 1 vol% Et<sub>3</sub>N) afforded **14a** as white solid (81.0 mg, 89%).

**TLC**:  $R_f$  0.29 (4:1 hexanes/EtOAc). **mp** = 122.4–125.5 °C. **IR** (NaCl, film): 2932 (s, C–H st), 2886 (m, C–H st), 2857 (s, C–H st), 1546 (vs, N=O st), 1496 (w), 1471 (m), 1461 (m), 1449 (m), 1439 (m), 1373 (vs, N=O st), 1257 (m, Si–Me), 1221(w), 1203 (w), 1172 (s, Si–O), 1143 (s, S=O st), 1125 (s, Si–O), 1089 (s), 1066 (s), 1002 (w), 956 (m), 911 (s), 868 (s), 852 (s), 838 (s), 776 (s), 734 (s), 700 (m), 655 (m).  **$^1\text{H-NMR}$**  (500 MHz):  $\delta$  7.87 (dd, 1H,  $J = 7.9, 1.3$ ), 7.68 (td, 1H,  $J = 7.7, 1.4$ ), 7.61 (td, 1H,  $J = 7.7, 1.3$ ), 7.57 (dd, 1H,  $J = 7.8, 1.3$ ), 7.33–7.27 (m, 4H), 7.23–7.20 (m, 1H), 5.35 (t, 1H,  $J = 8.0$ ), 3.56–3.50 (m, 1H), 2.78 (tdd, 1H,  $J = 11.5, 5.7, 2.8$ ), 2.58 (ddd, 1H,  $J = 13.2, 8.0, 5.2$ ), 2.38–2.28 (m, 1H), 2.11–2.07 (m, 1H), 1.99–1.92 (m, 2H), 1.82–1.76 (m, 1H), 1.72–1.52 (m, 3H), 0.73 (s, 9H), -0.16 (s, 3H), -0.21 (s, 3H).  **$^{13}\text{C-NMR}$**  (125 MHz):  $\delta$  147.9, 142.4, 138.3, 133.6, 132.3, 131.0, 130.8, 128.5, 128.3, 127.2, 126.8, 123.7, 66.2, 57.1, 42.9, 30.4, 25.7, 24.8, 23.3, 22.2, 18.0, -4.8, -5.3. **ESI-MS**  $m/z$  (rel int): (pos) 551 ( $[\text{M}+\text{Na}]^+$ , 100), 1080 ( $[\text{2M}+\text{H}+\text{Na}]^+$ , 20).

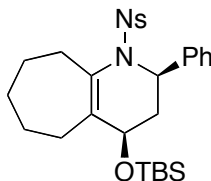

**cis-4-(tert-Butyldimethylsilyloxy)-1-(2-nitrophenylsulfonyl)-2-phenyl-2,3,4,5,6,7,8,9-nona-hydroquinoline (14b)**. Synthesized from crude alcohol **12b** (104 mg, 0.243 mmol) and TBSCl (83.0 mg, 0.551 mmol). Purification by silica flash chromatography (10:1 hexanes/EtOAc, 1 vol% Et<sub>3</sub>N) afforded **14b** as light yellow solid (120 mg, 91%).



**TLC:**  $R_f$  0.39 (4:1 hexanes/EtOAc). **mp** = 130.2–135.3 °C. **IR** (NaCl, film): 2952 (m, C–H st), 2928 (s, C–H st), 2855 (m, C–H st), 1588 (w), 1546 (vs, N=O st), 1495 (w), 1471 (w), 1461 (w), 1449 (w), 1439 (w), 1372 (s, N=O st), 1257 (m, Si–Me), 1173 (m, S=O st), 1145 (w, Si–O), 1122 (m, Si–O), 1067 (m), 977 (w), 954 (w), 896 (w), 882 (w), 852 (m), 838 (m), 775 (m), 740 (w), 669 (w).  **$^1\text{H-NMR}$**  (500 MHz):  $\delta$  7.94 (dd, 1H,  $J = 7.9, 1.3$ ), 7.69 (td, 1H,  $J = 7.7, 1.4$ ), 7.63 (td, 1H,  $J = 7.7, 1.3$ ), 7.58 (dd, 1H,  $J = 7.8, 1.3$ ), 7.37 (d, 2H,  $J = 7.4$ ), 7.31–7.28 (m, 2H), 7.24–7.21 (m, 1H), 5.33 (t, 1H,  $J = 7.8$ ), 3.47 (t, 1H,  $J = 6.7$ ), 2.70 (dd, 1H,  $J = 15.5, 9.4$ ), 2.58–2.51 (m, 2H), 2.38 (dd, 1H,  $J = 15.2, 7.8$ ), 2.22–2.17 (m, 1H), 1.97 (ddd, 1H,  $J = 13.3, 7.8, 6.7$ ), 1.80 (qd, 1H,  $J = 8.4, 3.5$ ), 1.70–1.62 (m, 2H), 1.56–1.42 (m, 3H), 0.75 (s, 9H), –0.16 (s, 3H), –0.19 (s, 3H).  **$^{13}\text{C-NMR}$**  (125 MHz):  $\delta$  148.0, 143.2, 142.0, 133.6, 133.1, 132.4, 131.0, 130.9, 128.3, 127.2, 127.0, 123.8, 66.2, 56.4, 42.2, 35.5, 31.9, 26.9, 26.2, 25.8, 25.7, 18.0, –4.7, –5.3. **ESI-MS**  $m/z$  (rel int): (pos) 565 ( $[\text{M}+\text{Na}]^+$ , 100).

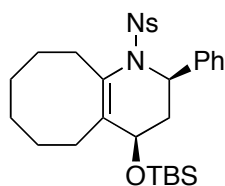

**4-(tert-Butyldimethylsilyloxy)-1-(2-nitrophenylsulfonyl)-2-phenyl-1,2,3,4,5,6,7,8,9,10-decahydrocycloocta[b]pyridine (14c).** Synthesized from crude alcohol **12c** (83.2 mg, 0.188 mmol) and TBSCl (65.0 mg, 0.431 mmol). Purification by silica flash chromatography (10:1 hexanes/EtOAc, 1 vol% Et<sub>3</sub>N) afforded **14c** as a light yellow solid (97.1 mg, 92%).

**TLC:**  $R_f$  0.40 (2:1 EtOAc/hexanes). **mp** = 127.1–131.4 °C. **IR** (NaCl, film): 2951 (m, C–H st), 2928 (s, C–H st), 2855 (m, C–H st), 1546 (vs, N=O st), 1496 (w), 1463 (m), 1373 (s, N=O st), 1256 (m, Si–Me), 1174 (m, S=O st), 1132 (m, Si–O), 1096 (m), 1068 (m), 1033 (w), 1005 (w), 980 (w), 948 (w), 910 (w), 880 (w), 853 (m), 837 (m), 776 (m), 773 (m).  **$^1\text{H-NMR}$**  (500 MHz):  $\delta$  7.84 (d, 1H,  $J = 7.7$ ), 7.67 (d, 1H,  $J = 7.5$ ), 7.58 (dd, 2H,  $J = 24.8, 7.7$ ), 7.46 (d, 2H,  $J = 7.5$ ), 7.31 (t, 2H,  $J = 7.4$ ), 7.24 (d, 1H,  $J = 7.4$ ), 5.40 (t, 1H,  $J = 8.4$ ), 3.49 (dd, 1H,  $J = 9.5, 4.4$ ), 2.92 (d, 1H,  $J = 14.6$ ), 2.66–2.61 (m, 1H), 2.53–2.48 (m, 1H), 2.28–2.21 (m, 2H), 1.98 (q, 1H,  $J = 10.7$ ), 1.59–1.49 (m, 3H), 1.36–1.24 (m, 5H), 0.81 (s, 9H), –0.12 (s, 3H), –0.25 (s, 3H).  **$^{13}\text{C-NMR}$**  (125 MHz):  $\delta$  148.0, 142.3, 142.0, 133.6, 131.5, 131.3, 130.6, 130.3, 128.3, 127.3, 127.1, 123.6, 67.1, 56.6, 43.0, 31.0, 30.0, 29.2, 26.6, 26.5, 26.3, 25.7, 17.9, –4.7, –5.3. **ESI-MS**  $m/z$  (rel int): (pos) 557 ( $[\text{M}+\text{H}]^+$ , 10), 579 ( $[\text{M}+\text{Na}]^+$ , 100); (neg) 591 ( $[\text{M}+\text{Cl}]^-$ , 100).

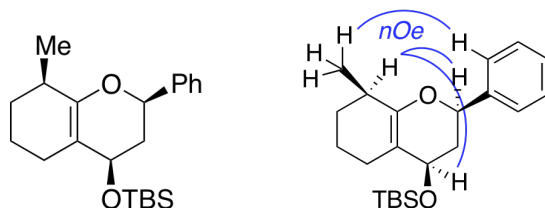

**tert-butyl dimethyl(((2R\*,4R\*,8R\*)-8-methyl-2-phenyl-3,4,5,6,7,8-hexahydro-2H-chromen-4-yl)oxy)silane (S11).** Synthesized from crude alcohol **S7** (50.0 mg, 0.206 mmol, 1.3:1.0 mixture of diastereomers at C8) and TBSCl (61.8 mg, 0.412 mmol). Purification by preparative thin

layer chromatography (130:1 hexanes/EtOAc; 6 elutions) afforded **S11** as a white solid (33.4 mg, 80%; based on a 1.3:1.0 mixture of diastereomers of alcohol **S7**).

The stereochemical configuration of **S11** was confirmed unambiguously by x-ray crystallographic analysis of a p-bromobenzoate derivative **17'** of the corresponding ring expansion product **17** (see below).

**TLC:**  $R_f$  0.48 (130:1 hexanes/EtOAc; 3 elutions). **IR** (NaCl, film): 2955 (s, C–H st), 2929 (s, C–H st), 2887 (m, C–H st), 2856 (s, C–H st), 1674 (m, C=C st), 1603 (w), 1496 (w), 1471 (m), 1461 (m), 1454 (m), 1348 (m), 1254 (s, Si–Me  $\delta$  sy), 1235 (m), 1152 (s), 1110 (s), 1089 (vs, C–O/Si–O st), 1070 (vs, C–O/Si–O st), 1049 (m), 935 (s), 903 (m), 835 (vs, Si–C st), 774 (s, Si–C st).  **$^1\text{H-NMR}$**  (500 MHz):  $\delta$  7.38–7.34 (m, 4H), 7.29 (dd, 1H,  $J = 5.9, 2.8$ ), 4.85 (dd, 1H,  $J = 12.6, 1.9$ ), 4.50–4.47 (m, 1H), 2.30–2.24 (m, 2H), 2.18 (ddd, 1H,  $J = 13.1, 6.7, 1.9$ ), 1.96 (td, 1H,  $J = 12.6, 9.7$ ), 1.86–1.72 (m, 3H), 1.51–1.43 (m, 1H), 1.38–1.31 (m, 1H), 1.13 (d, 3H,  $J = 6.8$ ), 0.89 (s, 9H), 0.09 (s, 3H), 0.06 (s, 3H).  **$^{13}\text{C-NMR}$**  (125 MHz):  $\delta$  152.0, 142.1, 128.4, 127.6, 125.9, 108.3, 75.9, 67.9, 41.8, 32.5, 32.1, 25.9, 25.3, 21.5, 18.5, 18.3, –4.2, –4.7. **ESI-MS**  $m/z$  (rel int): (pos) 227.2 ([M–TBSOH+H]<sup>+</sup>, 30), 249.1 ([M–TBSOH+Na]<sup>+</sup>, 100), 381.3 ([M+Na]<sup>+</sup>, 95).

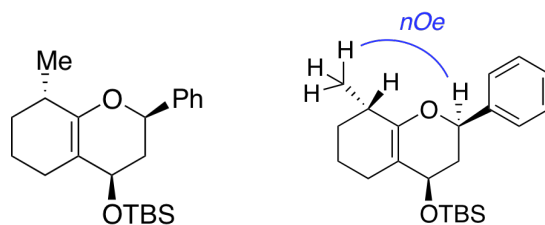

**tert-butyl dimethyl(((2R\*,4R\*,8S\*)-8-methyl-2-phenyl-3,4,5,6,7,8-hexahydro-2H-chromen-4-yl)oxy)silane (**S12**).** Synthesized from crude alcohol **S7** (50.0 mg, 0.206 mmol, 1.3:1.0 mixture of diastereomers) and TBSCl (61.8 mg, 0.412 mmol). Purification by preparative thin layer chromatography (130:1 hexanes/EtOAc; 6 elutions) afforded **S12** as a white solid (23.7 mg, 74%; based on a 1.3:1.0 mixture of diastereomers of alcohol **S7**).

**TLC:**  $R_f$  0.35 (130:1 hexanes/EtOAc; 3 elutions). **IR** (NaCl, film): 2955 (s, C–H st), 2929 (s, C–H st), 2886 (m, C–H st), 2857 (s, C–H st), 1679 (m, C=C st), 1497 (w), 1471 (m), 1462 (m), 1454 (m), 1348 (m), 1253 (s, Si–Me  $\delta$  sy), 1229 (m), 1147 (s), 1087 (vs, C–O/Si–O st), 1070 (vs, C–O/Si–O st), 1043 (m), 932 (m), 903 (m), 835 (vs, Si–C st), 774 (m, Si–C st).  **$^1\text{H-NMR}$**  (500 MHz):  $\delta$  7.40–7.35 (m, 4H), 7.30 (ddt, 1H,  $J = 7.2, 2.0, 2.5$ ), 4.80 (dd, 1H,  $J = 12.4, 1.6$ ), 4.48 (dd, 1H,  $J = 8.8, 7.6$ ), 2.29–2.20 (m, 3H), 2.03 (td, 1H,  $J = 12.7, 9.6$ ), 1.85–1.74 (m, 2H), 1.64–1.57 (m, 2H), 1.46 (dq, 1H,  $J = 10.4, 3.4$ ), 1.05 (d, 3H,  $J = 7.0$ ), 0.89 (s, 9H), 0.09 (s, 3H), 0.06 (s, 3H).  **$^{13}\text{C-NMR}$**  (125 MHz):  $\delta$  152.8, 141.6, 128.5, 127.8, 126.2, 108.0, 76.3, 67.8, 41.3, 31.0, 30.3, 25.9, 25.1, 18.9, 18.8, 18.2, –4.3, –4.8. **ESI-MS**  $m/z$  (rel int): (pos) 227.2 ([M–TBSOH+H]<sup>+</sup>, 30), 381.3 ([M+Na]<sup>+</sup>, 95).

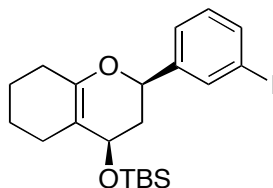

**tert-Butyl(cis-2-(3-iodophenyl)-3,4,5,6,7,8-hexahydro-2H-chromen-4-yloxy)dimethylsilane (S13).** Synthesized from crude alcohol **S8** (419 mg, 1.17 mmol) and TBSCl (217 mg, 1.44 mmol). Purification by silica flash chromatography (99:1 hexanes/EtOAc 0.5 vol% Et<sub>3</sub>N) afforded **S13** as a colorless oil (482 mg, 82%).

**TLC:**  $R_f$  0.73 (10:1 hexanes/EtOAc). **IR** (NaCl, film): 2950 (m, C–H st), 2928 (s, C–H st), 2888 (m, C–H st), 2855 (m, C–H st), 1685 (m, C=C st), 1593 (w), 1566 (w), 1472 (m), 1379 (w), 1360 (m), 1254 (m, Si–Me  $\delta$  sy), 1227 (m), 1151 (m), 1085 (s, C–O/Si–O st), 1066 (vs, C–O/Si–O st), 1007 (w), 971 (w), 938 (w), 906 (w), 837 (vs, Si–C st), 776 (s, Si–C st), 718 (w). **<sup>1</sup>H-NMR** (500 MHz):  $\delta$  7.73 (t, 1H,  $J = 1.6$ ), 7.63 (ddd, 1H,  $J = 7.8, 1.6, 1.1$ ), 7.33 (d, 1H,  $J = 7.8$ ), 7.09 (t, 1H,  $J = 7.8$ ), 4.79 (dd, 1H,  $J = 12.3, 1.9$ ), 4.44 (m, 1H), 2.28–2.22 (m, 1H), 2.17 (ddd, 1H,  $J = 13.2, 6.8, 1.9$ ), 2.12–1.95 (m, 3H), 1.85–1.80 (m, 1H), 1.76–1.71 (m, 2H), 1.66–1.58 (m, 1H), 1.52–1.44 (m, 1H), 0.89 (s, 9H), 0.09 (s, 3H), 0.06 (s, 3H). **<sup>13</sup>C-NMR** (125 MHz):  $\delta$  148.9, 144.0, 137.0, 135.4, 130.4, 125.6, 108.9, 94.6, 75.6, 67.4, 41.4, 27.5, 26.0, 24.6, 22.9, 22.8, 18.3, –4.1, –4.7. **ESI-MS**  $m/z$  (rel int): (pos) 493.2 ([M+Na]<sup>+</sup>, 100), 339.2 ([M–TBSOH+H]<sup>+</sup>, 11).

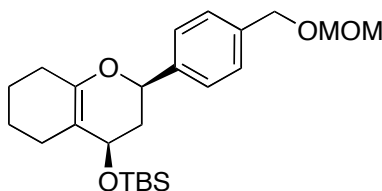

**tert-Butyl(cis-2-(4-((methoxymethoxy)methyl)phenyl)-3,4,5,6,7,8-hexahydro-2H-chromen-4-yloxy)dimethylsilane (S14).** Synthesized from crude alcohol **S9** (100 mg, 0.330 mmol) and TBSCl (59.0 mg, 0.391 mmol). Purification by silica flash chromatography (99:1 hexanes/EtOAc, 0.5 vol% Et<sub>3</sub>N) afforded **S14** as colorless oil that solidified upon storage at –20 °C (103 mg, 75%).

**TLC:**  $R_f$  0.47 (10:1 hexanes/EtOAc). **IR** (NaCl, film): 2948 (m, C–H st), 2929 (s, C–H st), 2886 (m, C–H, st), 2856 (m, C–H, st), 1471 (w), 1463 (w), 1382 (w), 1361 (m), 1255 (m, Si–Me  $\delta$  sy), 1151 (m), 1228 (m), 1150 (s, C–O/Si–O st), 1086 (s, C–O/Si–O st), 1064 (vs, C–O/Si–O st), 1050 (vs, C–O/Si–O st), 1007 (m), 971 (w), 911 (m), 911 (m), 895 (m), 836 (s, Si–C st), 775 (m). **<sup>1</sup>H-NMR** (500 MHz):  $\delta$  7.38–7.34 (m, 4H), 4.86 (dd, 1H,  $J = 12.4, 1.9$ ), 4.70 (s, 2H), 4.59 (s, 2H), 4.49–4.45 (m, 1H), 3.41 (s, 3H), 2.30–2.23 (m, 1H), 2.19 (ddd, 1H,  $J = 13.2, 6.9, 1.9$ ), 2.11–2.00 (m, 3H), 1.86–1.82 (m, 1H), 1.77–1.71 (m, 2H), 1.66–1.59 (m, 1H), 1.52–1.44 (m, 1H), 0.89 (s, 9H), 0.09 (s, 3H), 0.06 (s, 3H). **<sup>13</sup>C-NMR** (125 MHz):  $\delta$  137.7, 128.2, 126.5, 108.7, 95.7, 76.2, 69.0, 67.7, 55.5, 41.6, 27.6, 26.0, 24.6, 23.0, 22.9, 18.4, –4.1, –4.7. **ESI-MS**  $m/z$  (rel int): (pos) 441.1 ([M+Na]<sup>+</sup>, 100).

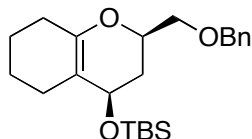

**(cis-2-(Benzyloxymethyl)-3,4,5,6,7,8-hexahydro-2H-chromen-4-yloxy)(tert-butyl)dimethylsilane (S15).** Synthesized from crude alcohol **S10** (50.1 mg, 0.183 mmol) and TBSCl (32.6 mg, 0.216 mmol). Purification by silica flash chromatography (99:1 hexanes/EtOAc, 0.5 vol% Et<sub>3</sub>N) afforded **S15** as a colorless oil (52.0 mg, 74%). The product decomposes slowly over time and must be stored frozen in benzene; for best results in the subsequent ring expansion reaction, **S15** should be used immediately after purification.

**TLC:** *R<sub>f</sub>* 0.45 (10:1 hexanes/EtOAc). **IR** (NaCl, film): 2929 (vs, C–H st), 2887 (m, C–H st), 2857 (s, C–H st), 1683 (m, C=C st), 1472 (w), 1455 (w), 1384 (w), 1361 (w), 1347 (w), 1321 (w), 1254 (m, Si–Me δ sy), 1152 (m), 1084 (s, C–O/Si–O st), 1065 (s, C–O/Si–O st), 1001 (m), 892 (m), 880 (m), 836 (s, Si–C st), 774 (s, Si–C st), 734 (m), 697 (m). **<sup>1</sup>H-NMR** (500 MHz): δ 7.36–7.27 (m, 5H), 4.62–4.56 (m, 2H), 4.24–4.21 (m, 1H), 4.10 (dddd, 1H, *J* = 10.3, 6.5, 4.1, 2.5), 3.68 (dd, 1H, *J* = 10.4, 6.5), 3.48 (dd, 1H, *J* = 10.4, 4.1), 2.27–2.19 (m, 1H), 2.08–2.01 (m, 3H), 1.78–1.44 (m, 6H), 0.89 (s, 9H), 0.07 (s, 3H), 0.06 (s, 3H). **<sup>13</sup>C-NMR** (125 MHz): δ 148.1, 138.5, 128.5, 127.9, 127.7, 108.3, 73.5, 73.1, 72.5, 66.4, 35.6, 27.6, 26.0, 24.9, 23.0, 22.9, 18.3, –4.55, –4.28. **ESI-MS** *m/z* (rel int): (pos) 406.3 ([M+NH<sub>4</sub>]<sup>+</sup>, 55), 256.9 ([M–TBSOH+H]<sup>+</sup>, 100); (neg) 255.2 ([M–TBSOH–H]<sup>–</sup>, 35).

---

**E. RING EXPANSION TO MACROLACTONES AND MACROLACTAMS (15–21)**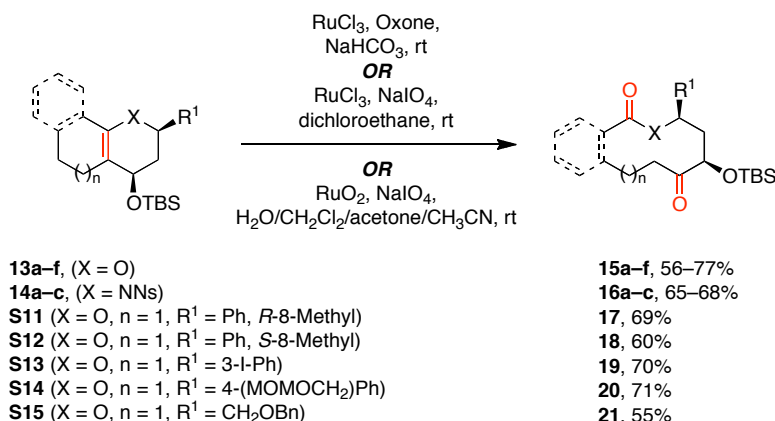

**Supplementary Figure 12. Oxidative ring expansions of the TBS-protected alcohols 13, 14, and S11–15.** Three related protocols, all employing RuO<sub>4</sub> as the active species,<sup>12</sup> were used to access the corresponding macrolactones and macrolactams 15–21.

**NOTE:** Due to their biphasic character, all of the oxidation reactions require vigorous stirring to assure sufficient dispersion of the layers. Insufficient mixing can result in more sluggish reactions and/or lower yields. Furthermore, the catalyst stock solution should always be freshly prepared right before use.

**General protocol for oxidative ring expansion using RuCl<sub>3</sub> with NaIO<sub>4</sub> as a stoichiometric oxidant (Protocol A)**<sup>12a,b</sup>

TBS-protected alcohol **13a–c** was dissolved in 1,2-dichloroethane (5.50 mL/mmol substrate). Water (4.50 mL/mmol) was added, followed by a solution of RuCl<sub>3</sub> (0.035 M in water, 3.5 mol%). Neat NaIO<sub>4</sub> (2.00 equiv) was added in one portion, and the resulting biphasic mixture was stirred until the reaction was complete as judged by TLC analysis (aliquots quenched with satd aq Na<sub>2</sub>S<sub>2</sub>O<sub>3</sub>, extracted with EtOAc). Satd aq Na<sub>2</sub>S<sub>2</sub>O<sub>3</sub> was added and the resulting mixture was stirred for 10 min, then extracted with CH<sub>2</sub>Cl<sub>2</sub> (5×). The combined organic extracts were washed with water and brine, and dried (MgSO<sub>4</sub>). To the desiccant slurry, a spatula of celite was added and the mixture was agitated for 5 min. The suspension was then filtered through a plug of celite and the solvents were removed by rotary evaporation. Purification by silica flash chromatography (hexanes/EtOAc, 0.5 vol% Et<sub>3</sub>N) afforded the macrolactone **15a–c**.

**General protocol for oxidative ring expansion using RuCl<sub>3</sub> with Oxone as a stoichiometric oxidant (Protocol B)**<sup>12a,b</sup>

TBS-protected alcohol **13d–f** or **S11–15** was dissolved in acetonitrile (16.0 mL/mmol). Water (10.0 mL/mmol substrate) was added, resulting in the precipitation of substrate from the solution in most cases. RuCl<sub>3</sub> (0.035 M in water, 3.5 mol%) was added and, after stirring for several minutes, the starting material partially redissolved. A solid mixture of Oxone (1.50 equiv) and

<sup>12</sup> (a) Yang, D.; Zhang, C. *J. Org. Chem.* **2001**, *66*, 4814. (b) Carlsen, P. H. J.; Katsuki, T.; Martin, V. S.; Sharpless, K. B. *J. Org. Chem.* **1981**, *46*, 3936. (c) Torii, S.; Inokuchi, T.; Kondo, K. *J. Org. Chem.* **1985**, *50*, 4980. (d) Rincon, S.; del Río, R. E.; Sandoval-Ramírez, J.; Meza-Reyes, S.; Montiel-Smith, S.; Fernández, M. A.; Farfán, N.; Santillan, R. *Tetrahedron*, **2006**, *62*, 2594.

NaHCO<sub>3</sub> (4.60 equiv, 1.02 equiv relative to Oxone protons) was then added in portions. The mixture was stirred until the reaction was complete as judged by TLC analysis (aliquots quenched with satd aq Na<sub>2</sub>S<sub>2</sub>O<sub>3</sub>, extracted with EtOAc). Satd aq Na<sub>2</sub>S<sub>2</sub>O<sub>3</sub> was added, and the resulting mixture was stirred for 10 min, then extracted with EtOAc (3×). The combined organic extracts were washed with water and brine, dried (MgSO<sub>4</sub>), filtered, and concentrated by rotary evaporation. Purification by silica flash chromatography (hexanes/EtOAc, 0.5 vol% Et<sub>3</sub>N) afforded the macrolactone **15d–f** or **17–21**.

**General protocol for oxidative ring expansion using RuO<sub>2</sub> with NaIO<sub>4</sub> as a stoichiometric oxidant (Protocol C)**<sup>12c,d</sup>

TBS-protected alcohol **14a–c** was dissolved in CH<sub>2</sub>Cl<sub>2</sub> (14.0 mL/mmol). Acetonitrile (6.00 mL/mmol substrate) and acetone (6.00 mL/mmol substrate) were added. In a separate flask, NaIO<sub>4</sub> (3.00 equiv) was dissolved in H<sub>2</sub>O (5.3 mL/mmol substrate) and RuO<sub>2</sub> (17 mol%) was added. The activated catalyst was then added to the solution of TBS-protected alcohol in two portions over 5 min and stirred until the reaction was complete as judged by TLC analysis (ca. 40 min). Satd aq Na<sub>2</sub>S<sub>2</sub>O<sub>3</sub> was added and the resulting mixture was extracted with CH<sub>2</sub>Cl<sub>2</sub> (3×). The combined organic extracts were washed with brine, dried (MgSO<sub>4</sub>), and filtered over a pad of celite covered by a thin layer of activated charcoal. The filtrate was concentrated by rotary evaporation. Purification by silica flash chromatography (hexanes/EtOAc) afforded the macrolactam **16a–c**.

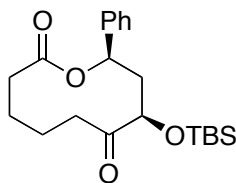

**cis-8-(tert-Butyldimethylsilyloxy)-10-phenyloxecane-2,7-dione (15a)**. Synthesized according to Protocol A from TBS-protected alcohol **13a** (38.0 mg, 0.110 mmol). Purification by silica flash chromatography (10:1 hexanes/EtOAc, 0.5 vol% Et<sub>3</sub>N) afforded **15a** as a colorless solid (31.5 mg, 71%).

A yield of 82% was also obtained using Protocol B.

**TLC:** *R<sub>f</sub>* 0.22 (10:1 hexanes/EtOAc). **mp** = 66.1–67.4 °C. **IR** (NaCl, film): 2932 (s, C–H st), 2892 (m, C–H st), 2858 (m, C–H st), 1736 (vs, C=O st, shoulder visible), 1462 (w), 1415 (w), 1363 (w), 1250 (s, Si–Me δ sy), 1232 (s, Si–Me δ sy), 1162 (m), 1116 (m), 1088 (m, Si–O st), 1055 (m), 1018 (m), 947 (w), 837 (m, Si–C st), 778 (m), 699 (m). **<sup>1</sup>H-NMR** (500 MHz): δ 7.36–7.26 (m, 5H), 5.86 (dd, 1H, *J* = 10.7, 2.4), 4.27 (dd, 1H, *J* = 9.6, 4.9), 2.75 (ddd, 1H, *J* = 18.3, 7.9, 2.4), 2.60–2.43 (m, 3H), 2.29 (ddd, 1H, *J* = 17.4, 12.8, 2.4), 2.22 (ddd, 1H, *J* = 14.3, 4.9, 2.4), 2.08–2.01 (m, 1H), 1.94 (qd, 1H, *J* = 12.8, 2.2), 1.77–1.65 (m, 2H), 0.83 (s, 9H), 0.01 (s, 3H), –0.01 (s, 3H). **<sup>13</sup>C-NMR** (125 MHz): δ 210.9, 171.9, 139.7, 128.7, 128.3, 126.5, 77.0, 72.3, 43.3, 38.3, 35.2, 25.8, 22.2, 22.2, 18.2, –4.8, –4.9. **ESI-MS** *m/z* (rel int): (pos) 399.1 ([M+Na]<sup>+</sup>, 100); (neg) 375.2 ([M–H]<sup>–</sup>, 100).

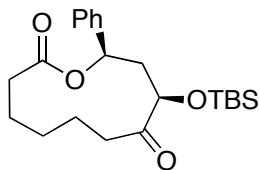

**cis-9-(tert-Butyldimethylsilyloxy)-11-phenyloxacycloundecane-2,8-dione (15b).** Synthesized according to Protocol A from TBS-protected alcohol **13b** (40.0 mg, 0.112 mmol). Purification by silica flash chromatography (10:1 hexanes/EtOAc, 0.5 vol% Et<sub>3</sub>N) afforded **15b** as a colorless oil (30.7 mg, 70%).

**TLC:**  $R_f$  0.27 (10:1 hexanes/EtOAc). **IR** (NaCl, film): 2954 (s, C–H st), 2930 (s, C–H st), 2884 (m, C–H st), 2857 (m, C–H st), 1741 (vs, C=O st), 1715 (s, C=O st), 1463 (w), 1363 (w), 1335 (w), 1253 (s, Si–Me  $\delta$  sy), 1238 (s, Si–Me  $\delta$  sy), 1190 (w), 1143 (m), 1088 (s, C–O/Si–O st), 1041 (m, C–O/Si–O st), 993 (m), 888 (m), 857 (m), 838 (s, Si–C st), 811 (w), 779 (s, Si–C st), 763 (m), 699 (m). **<sup>1</sup>H-NMR** (500 MHz):  $\delta$  7.33–7.26 (m, 5H), 5.61 (dd, 1H,  $J = 10.3, 1.0$ ), 4.20 (dd, 1H,  $J = 9.3, 6.1$ ), 3.12 (ddd, 1H,  $J = 18.9, 11.3, 3.6$ ), 2.47–2.55 (m, 2H), 2.33–2.38 (m, 1H), 2.21–2.13 (m, 2H), 1.91–1.84 (m, 1H), 1.80–1.66 (m, 2H), 1.59–1.47 (m, 2H), 1.38–1.32 (m, 1H), 0.86 (s, 9H), 0.02 (s, 3H), 0.01 (s, 3H). **<sup>13</sup>C-NMR** (125 MHz):  $\delta$  211.4, 171.7, 141.2, 128.7, 128.1, 126.1, 77.8, 72.5, 43.1, 36.2, 33.2, 25.8, 24.8, 21.1, 20.4, 18.2, –4.8, –4.9. **ESI-MS**  $m/z$  (rel int): (pos) 413.2 ([M+Na]<sup>+</sup>, 35), 408.3 ([M+NH<sub>4</sub>]<sup>+</sup>, 89), 391.2 ([M+H]<sup>+</sup>, 100); (neg) 389.3 ([M–H]<sup>–</sup>, 28).

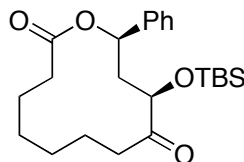

**cis-10-(tert-Butyldimethylsilyloxy)-12-phenyloxacyclododecane-2,9-dione (15c).** Synthesized according to Protocol A from TBS-protected alcohol **13c** (41.0 mg, 0.110 mmol). Purification by silica flash chromatography (10:1 hexanes/EtOAc, 0.5 vol% Et<sub>3</sub>N) afforded **15c** as a colorless oil that solidified upon storage at –20 °C (31.5 mg, 71%).

**TLC:**  $R_f$  0.42 (10:1 hexanes/EtOAc). **mp** = 53.9–57.0 °C. **IR** (NaCl, film): 2952 (m, C–H st), 2931 (s, C–H st), 2857 (m, C–H st), 1734 (vs, C=O st, shoulder at *ca.* 1720), 1461 (w), 1361 (w), 1254 (s, Si–Me  $\delta$  sy), 1143 (m), 1098 (s, C–O/Si–O st), 1077 (s, C–O/Si–O st), 1010 (w), 982 (w), 935 (w), 838 (s, Si–C st), 699 (m). **<sup>1</sup>H-NMR** (500 MHz):  $\delta$  7.33–7.31 (m, 4H), 7.28–7.26 (m, 1H), 5.77 (dd, 1H,  $J = 10.8, 2.0$ ), 4.25 (dd, 1H,  $J = 9.5, 3.8$ ), 2.78–2.70 (m, 2H), 2.55 (ddd, 1H,  $J = 18.2, 9.5, 2.9$ ), 2.32 (ddd, 1H,  $J = 13.0, 10.1, 3.7$ ), 2.21 (ddd, 1H,  $J = 14.0, 7.2, 3.7$ ), 1.93–1.37 (m, 8H), 1.29–1.20 (m, 1H), 0.87 (s, 9H), 0.09 (s, 3H), 0.07 (s, 3H). **<sup>13</sup>C-NMR** (125 MHz):  $\delta$  209.3, 172.9, 141.4, 128.7, 128.1, 126.3, 77.0, 73.5, 41.3, 37.0, 34.0, 25.8, 25.6, 25.2, 23.1, 20.0, 18.1, –4.6, –4.7. **ESI-MS**  $m/z$  (rel int): (pos) 427.2 ([M+Na]<sup>+</sup>, 63), 422.2 ([M+NH<sub>4</sub>]<sup>+</sup>, 100), 405.2 ([M+H]<sup>+</sup>, 75); (neg) 403.1 ([M–H]<sup>–</sup>, 25).

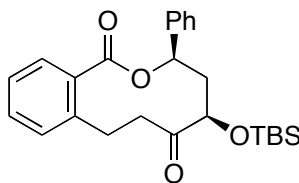

**cis-5-(tert-Butyldimethylsilyloxy)-3-phenyl-4,5,7,8-tetrahydro-1H-benzo[*c*]oxecine-1,6(3H)-dione (15d).** Synthesized according to Protocol B from TBS-protected alcohol **13d** (500 mg, 1.27 mmol), except that 3.0 equiv of Oxone and 9.2 equiv of NaHCO<sub>3</sub> were used. Purification by silica flash chromatography (10:1 hexanes/ EtOAc, 0.5 vol% Et<sub>3</sub>N) afforded **15d** as a colorless solid (302 mg, 56%).

**TLC:** *R<sub>f</sub>* 0.21 (10:1 hexanes/EtOAc). **mp** = 121.3–121.8 °C. **IR** (NaCl, film): 2953 (m, C–H st), 2928 (m, C–H st), 2885 (m, C–H st), 2856 (m, C–H st), 1721 (vs, C=O st, shoulder at 1710), 1602 (w), 1497 (w), 1449 (w), 1361 (w), 1289 (m), 1263 (vs, Si–Me δ sy), 1116 (s, C–O/Si–O st), 1102 (s, C–O/Si–O st), 1050 (w), 939 (w), 866 (m), 837 (s, Si–C st), 780 (m, Si–C st), 754 (m), 699 (m). **<sup>1</sup>H-NMR** (500 MHz): δ 8.03 (dd, 1H, *J* = 7.8, 1.5), 7.48 (td, 1H, *J* = 7.5, 1.5), 7.41–7.39 (m, 2H), 7.36–7.27 (m, 5H), 6.05 (dd, 1H, *J* = 7.8, 4.8), 4.28 (dd, 1H, *J* = 8.1, 5.0), 4.13 (ddd, 1H, *J* = 13.5, 12.3, 3.6), 3.51 (ddd, 1H, *J* = 12.0, 6.0, 3.6), 2.99 (ddd, 1H, *J* = 13.5, 6.0, 4.3), 2.65–2.58 (m, 2H), 2.17 (td, 1H, *J* = 12.0, 4.3), 0.83 (s, 9H), 0.01 (s, 3H), –0.07 (s, 3H). **<sup>13</sup>C-NMR** (125 MHz): δ 212.7, 166.4, 141.9, 140.3, 133.3, 132.2, 132.2, 129.1, 128.7, 127.9, 127.3, 126.0, 77.8, 72.4, 42.3, 38.6, 34.6, 25.8, 18.2, –4.8, –5.1. **ESI-MS** *m/z* (rel int): (pos) 447.2 ([M+Na]<sup>+</sup>, 100), 442.3 ([M+NH<sub>4</sub>]<sup>+</sup>, 76), 425.3 ([M+H]<sup>+</sup>, 23); (neg) 423.5 ([M–H]<sup>–</sup>, 90).

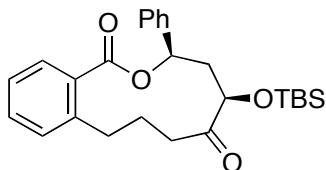

**cis-5-(tert-Butyldimethylsilyloxy)-3-phenyl-4,5,8,9-tetrahydrobenzo[*c*][1]oxacycloundecine-1,6(3H,7H)-dione (15e).** Synthesized according to Protocol B from TBS-protected alcohol **13e** (100 mg, 0.246 mmol), except that 2.7 equiv of Oxone and 8.5 equiv of NaHCO<sub>3</sub> were used. Purification by silica flash chromatography (10:1 hexanes/EtOAc, 0.5 vol% Et<sub>3</sub>N) afforded **15e** as a colorless solid (74.3 mg, 69%).

**TLC:** *R<sub>f</sub>* 0.65 (10:1 hexanes/EtOAc). **mp** = 92.0–93.8 °C. **IR** (NaCl, film): 2953 (m, C–H st), 2929 (m, C–H st), 2884 (w, C–H st), 2856 (m, C–H st), 1710 (C=O st, shoulder at *ca.* 1740), 1617 (w), 1496 (w), 1471 (w), 1461 (w), 1447 (w), 1362 (m), 1330 (m), 1262 (vs, Si–Me δ sy), 1114 (s, C–O/Si–O st), 1104 (s, C–O/Si–O st), 1082 (s, C–O/Si–O st), 1050 (m), 1014 (w), 965 (w), 913 (w), 876 (m), 836 (s, Si–C st), 778 (m, Si–C st), 752 (m), 699 (m). **<sup>1</sup>H-NMR** (500 MHz): δ 7.60 (dd, 1H, *J* = 7.8, 1.2), 7.42 (td, 1H, *J* = 7.5, 1.4), 7.35–7.32 (m, 4H), 7.28–7.25 (m, 2H), 7.23 (td, 1H, *J* = 7.5, 1.2), 5.98 (dd, 1H, *J* = 8.8, 4.2), 4.34 (dd, 1H, *J* = 8.3, 4.5), 3.04 (dt, 1H, *J* = 13.9, 5.3), 2.92 (ddd, 1H, *J* = 17.8, 10.5, 3.3), 2.81 (ddd, 1H, *J* = 13.9, 9.7, 4.3), 2.57 (dt, 1H, *J* = 14.8, 8.8), 2.48–2.39 (m, 2H), 2.04–2.10 (m, 2H), 0.80 (s, 9H), –0.01 (s, 3H), –0.06 (s, 3H). **<sup>13</sup>C-NMR** (125 MHz): δ 212.5, 168.2, 141.8, 141.0, 131.9, 131.7, 131.2, 130.0,



128.7, 127.9, 126.2, 126.0, 76.5, 74.4, 42.6, 36.4, 31.8, 25.8, 25.4, 18.2, -4.8, -4.9. **ESI-MS**  $m/z$  (rel int): (pos) 477.2 ( $[M+K]^+$ , 3), 461.2 ( $[M+Na]^+$ , 100); (neg) 437.1 ( $[M-H]^-$ , 75).

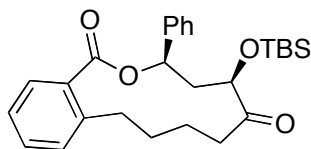

**cis-5-(tert-Butyldimethylsilyloxy)-3-phenyl-4,5,7,8,9,10-hexahydro-1H-benzo[*c*][1]oxacyclododecine-1,6(3H)-dione (15f).** Synthesized according to Protocol B from TBS-protected alcohol **13f** (50.0 mg, 0.119 mmol), except that 3.0 equiv of Oxone and 9.2 equiv of  $NaHCO_3$  were used. Purification by silica flash chromatography (10:1 hexanes/EtOAc, 0.5 vol%  $Et_3N$ ) afforded **15f** as a colorless solid (31.6 mg, 59%).

**TLC:**  $R_f$  0.34 (10:1 hexanes/EtOAc). **mp** = 113.5–115.5°C. **IR** (NaCl, film): 2954 (m, C–H st), 2931 (m, C–H st), 2857 (m, C–H st), 1717 (vs, C=O st), 1651 (w), 1601 (w), 1559 (w), 1540 (w), 1458 (m), 1364 (w), 1335 (w), 1274 (m), 1250 (s, Si–Me  $\delta$  sy), 1084 (s, C–O/Si–O st), 1050 (m, C–O/Si–O st), 976 (w), 930 (w), 878 (m), 837 (m), 779 (m, Si–C st), 752 (m, Si–C st). **<sup>1</sup>H-NMR** (500 MHz):  $\delta$  7.63 (dd, 1H,  $J$  = 7.6, 1.3), 7.36 (td, 1H,  $J$  = 7.6, 1.3), 7.31–7.27 (m, 5H), 7.20 (d, 1H,  $J$  = 7.6), 7.16 (td, 1H,  $J$  = 7.6, 1.0), 5.94 (d, 1H,  $J$  = 9.8), 4.27 (dd, 1H,  $J$  = 10.5, 5.9), 3.57 (td, 1H,  $J$  = 11.8, 4.6), 3.14 (ddd, 1H,  $J$  = 19.6, 11.8, 3.9), 2.69–2.55 (m, 2H), 2.38 (td, 1H,  $J$  = 11.8, 7.2), 2.12 (dd, 1H,  $J$  = 15.2, 5.9), 2.04–1.98 (m, 1H), 1.69–1.62 (m, 2H), 1.50 (ddd, 1H,  $J$  = 14.4, 10.9, 3.8), 0.88 (s, 9H), 0.05 (s, 6H). **<sup>13</sup>C-NMR** (125 MHz):  $\delta$  211.3, 168.3, 143.4, 141.9, 132.1, 132.0, 130.7, 130.5, 128.9, 128.0, 126.1, 125.8, 78.5, 73.9, 43.6, 33.0, 32.3, 30.3, 25.8, 20.7, 18.1, -4.8, -4.9. **ESI-MS**  $m/z$  (rel int): (pos) 475.5 ( $[M+Na]^+$ , 100); (neg) 452 ( $[M-H]^-$ , 50).

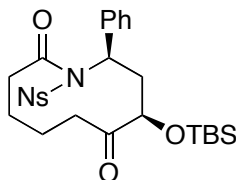

**cis-8-(tert-Butyldimethylsilyloxy)-1-(2-nitrophenylsulfonyl)-10-phenylazecane-2,7-dione (16a).** Synthesized according to Protocol C from TBS-protected alcohol **14a** (20 mg, 0.038 mmol). Purification by silica flash chromatography (6:1 hexanes/EtOAc) afforded **16a** as white solid (14.5 mg, 68%).

**TLC:**  $R_f$  0.10 (4:1 hexanes/EtOAc). **mp** = 147.2–149.5 °C. **IR** (NaCl, film): 2954 (m, C–H st), 2930 (m, C–H st), 2894 (w), 2858 (m), 1718 (s, C=O st), 1593 (w), 1544 (vs, N=O st), 1496 (w), 1442 (m), 1370 (vs, N=O st), 1256 (w, Si–Me), 1192 (m, S=O st), 1123 (m, Si–O), 1079 (m), 1025 (w), 979 (w), 963 (w), 941 (w), 911 (w), 855 (m), 839 (m), 779 (m), 734 (s), 700 (m), 656 (m). **<sup>1</sup>H-NMR** (500 MHz):  $\delta$  7.80 (d, 1H,  $J$  = 7.9), 7.56 (d, 1H,  $J$  = 7.9), 7.46 (t, 1H,  $J$  = 7.7), 7.31 (t, 1H,  $J$  = 7.7), 7.14 (d, 2H,  $J$  = 7.0), 6.97–6.93 (m, 3H), 5.33 (d, 1H,  $J$  = 11.5), 4.29 (dd, 1H,  $J$  = 11.3, 4.8), 3.26 (dt, 1H,  $J$  = 15.3, 11.5), 3.04 (dd, 1H,  $J$  = 16.4, 10.3), 2.81 (ddd, 2H,  $J$  = 35.2, 17.9, 9.8), 2.35 (dd, 1H,  $J$  = 19.3, 6.9), 2.14 (sextet, 2H,  $J$  = 11.9), 2.00–1.94 (m, 2H), 1.70–1.59 (m, 1H), 0.85 (s, 10H), 0.06 (s, 3H), 0.02 (s, 3H). **<sup>13</sup>C-NMR** (125 MHz):  $\delta$  211.7,

177.2, 147.2, 139.6, 134.2, 133.1, 132.5, 131.9, 128.1, 127.4, 127.0, 124.9, 79.4, 62.5, 40.6, 39.9, 34.8, 25.6, 25.4, 21.3, 17.9, -5.0, -5.1. **ESI-MS**  $m/z$  (rel int): (pos) 583 ( $[M+Na]^+$ , 20); (neg) 559 ( $[M-H]^-$ , 45), 595 (100).

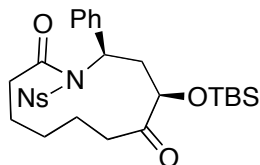

**cis-9-(tert-Butyldimethylsilyloxy)-1-(2-nitrophenylsulfonyl)-11-phenylazacycloundecane-2,8-dione (16b)**. Synthesized according to Protocol C from TBS-protected alcohol **14b** (20 mg, 0.037 mmol). Purification by silica flash chromatography (6:1 hexanes/EtOAc) afforded **16b** as a white resin (13.8 mg, 65%).

**TLC:**  $R_f$  0.20 (4:1 hexanes/EtOAc). **IR** (NaCl, film): 2952 (m, C-H st), 2931 (m, C-H st), 2886 (w), 2857 (m), 1719 (s, C=O st), 1592 (w), 1545 (vs, N=O st), 1497 (w), 1463 (m), 1442 (m), 1370 (vs, N=O st), 1254 (w, Si-Me), 1178 (m, S=O st), 1121 (m, Si-O), 948 (w), 912 (w), 839 (m), 779 (m), 733 (m). **<sup>1</sup>H-NMR** (500 MHz):  $\delta$  7.60 (dd, 1H,  $J = 8.0, 1.1$ ), 7.55–7.51 (m, 2H), 7.34 (td, 1H,  $J = 7.7, 1.1$ ), 7.25–7.24 (m, 2H), 7.12–7.07 (m, 3H), 5.29 (t, 1H,  $J = 6.4$ ), 4.46–4.41 (m, 1H), 3.05–2.99 (m, 2H), 2.85–2.71 (m, 2H), 2.50–2.40 (m, 1H), 2.36–2.30 (m, 1H), 2.03–1.87 (m, 2H), 1.86–1.78 (m, 1H), 1.75–1.67 (m, 1H), 1.66–1.57 (m, 1H), 1.54–1.48 (m, 1H), 0.96 (s, 9H), 0.16 (s, 3H), 0.11 (s, 3H). **<sup>13</sup>C-NMR** (125 MHz):  $\delta$  211.8, 176.0, 147.5, 134.3, 132.9, 131.9, 131.5, 128.2, 128.0, 127.8, 127.7, 124.7, 75.2, 58.4, 39.4, 38.2, 34.9, 26.2, 25.8, 22.8, 21.2, 18.2, -4.6, -5.0. **ESI-MS**  $m/z$  (rel int): (pos) 575 ( $[M+H]^+$ , 15), 597 ( $[M+Na]^+$ , 100); (neg) 573 ( $[M-H]^-$ , 100).

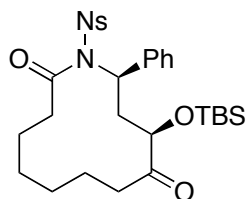

**cis-10-(tert-Butyldimethylsilyloxy)-1-(2-nitrophenylsulfonyl)-12-phenylazacyclododecane-2,9-dione (16c)**. Synthesized according to Protocol C from TBS-protected alcohol **14c** (20 mg, 0.036 mmol). Purification by silica flash chromatography (6:1 hexanes/EtOAc) afforded **16c** as a colorless oil (13.9 mg, 66%).

**TLC:**  $R_f$  0.25 (4:1 hexanes/EtOAc). **IR** (NaCl, film): 2953 (m, C-H st), 2930 (m, C-H st), 2857 (m), 1719 (s, C=O st), 1544 (vs, N=O st), 1497 (w), 1464 (m), 1451 (m), 1441 (m), 1370 (vs, N=O st), 1255 (m, Si-Me), 1179 (m, S=O st), 1105 (m, Si-O), 945 (w), 917 (w), 852 (m), 778 (m), 740 (w), 732 (w). **<sup>1</sup>H-NMR** (500 MHz):  $\delta$  7.60 (dd, 1H,  $J = 8.0, 1.3$ ), 7.54 (td, 1H,  $J = 7.7, 1.3$ ), 7.47–7.45 (m, 1H), 7.37–7.34 (m, 3H), 7.21–7.17 (m, 3H), 5.38 (t, 1H,  $J = 6.6$ ), 4.21 (t, 1H,  $J = 6.4$ ), 2.99 (ddd, 1H,  $J = 14.5, 8.3, 6.4$ ), 2.89–2.76 (m, 3H), 2.62 (ddd, 1H,  $J = 14.7, 7.1, 5.9$ ), 2.41 (ddd, 1H,  $J = 17.1, 6.9, 4.6$ ), 1.93–1.85 (m, 1H), 1.81–1.72 (m, 2H), 1.68–1.60 (m, 2H), 1.48 (dq, 1H,  $J = 13.6, 6.6$ ), 1.40–1.28 (m, 2H), 0.96 (s, 9H), 0.14 (s, 3H), 0.07 (s, 3H). **<sup>13</sup>C-NMR** (125 MHz):  $\delta$  212.3, 175.7, 147.6, 136.7, 133.9, 133.3, 131.7, 131.4, 128.3, 128.3,

128.1, 124.4, 76.1, 60.4, 38.9, 37.9, 36.1, 26.3, 25.8, 25.3, 25.1, 22.2, 18.2, -4.61, -4.79.  
**ESI-MS**  $m/z$  (rel int): (pos) 611 ( $[M-H+Na]^+$ , 100); (neg) 589 ( $[M]^-$ , 100).

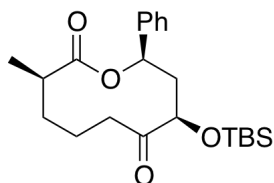

**(3*R*\*,8*R*\*,10*R*\*)-8-((*tert*-butyldimethylsilyl)oxy)-3-methyl-10-phenyloxecane-2,7-dione (17).** Synthesized according to Protocol B from TBS-protected alcohol **S11** (10 mg, 0.028 mmol). Purification by silica flash chromatography (10:1 hexanes/EtOAc, 0.5 vol% Et<sub>3</sub>N) afforded **17** as a colorless oil (7.4 mg, 69%).

The stereochemical configuration of macrocycle **17** was confirmed unambiguously by x-ray crystallographic analysis of a *p*-bromobenzoate derivative **17'** (see below).

**TLC:**  $R_f$  0.48 (4:1 hexanes/EtOAc). **<sup>1</sup>H-NMR** (500 MHz):  $\delta$  7.36–7.27 (m, 5H), 5.86 (dd, 1H,  $J$  = 11.0, 2.2), 4.30 (dd, 1H,  $J$  = 9.7, 4.9), 2.65–2.59 (m, 1H), 2.56–2.37 (m, 3H), 2.21 (ddd, 1H,  $J$  = 14.3, 4.9, 2.2), 2.11–2.04 (m, 1H), 1.95–1.87 (m, 1H), 1.74–1.67 (m, 1H), 1.54 (ddt, 1H,  $J$  = 11.7, 5.9, 2.9), 1.10 (d, 3H,  $J$  = 7.2), 0.84 (s, 9H), 0.02 (s, 3H), 0.00 (s, 3H). **<sup>13</sup>C-NMR** (125 MHz):  $\delta$  210.4, 175.0, 139.8, 128.6, 128.1, 126.0, 76.6, 72.0, 43.7, 41.6, 38.3, 30.7, 25.7, 21.3, 19.8, 18.1, -4.8, -5.0. **ESI-MS**  $m/z$  (rel int): (pos) 413.3 ( $[M+Na]^+$ , 100), 803.6 ( $[2M+Na]^+$ , 75).

### Derivatization of macrocycle 17 for x-ray crystallographic analysis

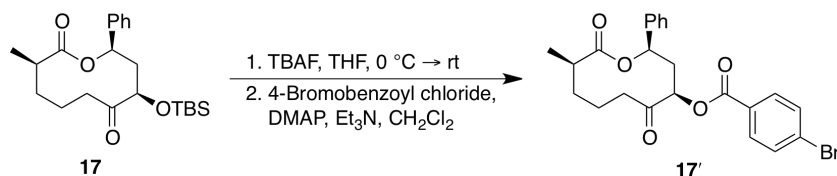

**(2*R*\*,4*R*\*,9*R*\*)-9-methyl-5,10-dioxo-2-phenyloxecan-4-yl 4-bromobenzoate (17').** In a 4 mL vial equipped with a septum and magnetic stir bar, macrocycle **17** (7.4 mg, 0.019 mmol) was dissolved in THF (1.0 mL) under Ar and cooled to 0 °C. A 1:1 solution of TBAF and AcOH (40  $\mu$ L, 0.038 mmol, 2.0 equiv.) was then added and the reaction was stirred at rt for 5 h. The reaction was diluted with sat aq NaHCO<sub>3</sub> and extracted with EtOAc (3 $\times$ ). The combined organic extracts were washed with brine, dried (MgSO<sub>4</sub>), filtered, and concentrated by rotary evaporation to afford the crude alcohol that was used without further purification. In a 4 mL vial equipped with a septum and magnetic stir bar, the crude alcohol was dissolved in CH<sub>2</sub>Cl<sub>2</sub> (1.0 mL) under Ar. To the solution was added Et<sub>3</sub>N (5.3  $\mu$ L, 0.038 mmol, 2.0 equiv.) and DMAP (cat.), and the mixture was cooled to 0 °C. A solution of 4-bromobenzoyl chloride (5.0 mg, 0.023 mmol, 1.2 equiv) in 100  $\mu$ L CH<sub>2</sub>Cl<sub>2</sub> was then added and the mixture was allowed to warm to rt overnight. The reaction was diluted with sat aq NaHCO<sub>3</sub> and extracted with CH<sub>2</sub>Cl<sub>2</sub> (3 $\times$ ). The combined

organic extracts were washed with brine, dried (MgSO<sub>4</sub>), filtered, and concentrated by rotary evaporation. Purification by silica flash chromatography (10:1 hexanes/EtOAc with 0.5 vol% Et<sub>3</sub>N) afforded *p*-bromobenzoate derivative **17'** as a white crystalline solid (6.0 mg, 68% over 2 steps), which was then recrystallized from CH<sub>2</sub>Cl<sub>2</sub>/toluene.

**TLC:** *R<sub>f</sub>* 0.63 (1:1 hexanes/EtOAc). **<sup>1</sup>H-NMR** (500 MHz): δ 7.64 (d, 2H, *J* = 8.5), 7.51 (d, 2H, *J* = 8.5), 7.39–7.33 (m, 5H), 6.06 (dd, 1H, *J* = 9.8, 2.6), 5.21 (dd, 1H, *J* = 9.8, 3.9), 2.77–2.70 (m, 3H), 2.61–2.57 (m, 1H), 2.45–2.38 (m, 1H), 2.32–2.24 (m, 1H), 2.10–2.02 (m, 1H), 1.53–1.50 (m, 2H), 1.16 (d, 3H, *J* = 7.1). **<sup>13</sup>C-NMR** (125 MHz): δ 205.3, 175.4, 165.1, 139.3, 131.7, 131.3, 128.8, 128.6, 128.2, 127.9, 125.8, 76.7, 72.1, 41.2, 39.4, 38.0, 29.1, 21.5, 19.5. **ESI-MS** *m/z* (rel int): (pos) 481.2 ([M+Na]<sup>+</sup>, 100), 483.1 ([M+2+Na]<sup>+</sup>, 97).

### X-ray crystallographic analysis of macrocycle *p*-bromobenzoate derivative **17'**<sup>13</sup>

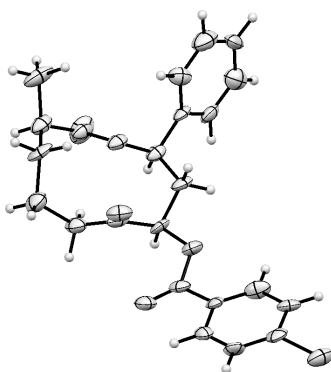

Molecules of C<sub>23</sub>H<sub>23</sub>BrO<sub>5</sub>, crystallized in the space group P2<sub>1</sub>/c with unit cell dimensions *a* = 18.606(10) Å, *b* = 11.432(6) Å, *c* = 9.801(5) Å, β = 79.820(9) ° at 150 K. A crystal of 0.20 mm x 0.02 mm x 0.01 mm was measured using Mo K<sub>α</sub> radiation, which resulted in diffraction data to a maximum of < 44° in 2θ. The structure solution confirmed the composition of C<sub>23</sub>H<sub>23</sub>BrO<sub>5</sub>, and the structure refinement converged to R<sub>1</sub> = 7.97% and wR<sub>2</sub> (all data) = 22.57%. Both enantiomers C8-*R*,C13-*R*,C16-*R* and C8-*S*,C13-*S*,C16-*S* are present in the unit cell but due to symmetry elements, only one is shown in the structure solution.

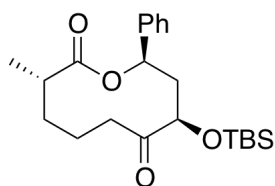

**(3*S*\*,8*R*\*,10*R*\*)-8-((*tert*-butyldimethylsilyl)oxy)-3-methyl-10-phenyloxecane-2,7-dione (18).** Synthesized according to Protocol B from TBS-protected alcohol **S12** (10 mg, 0.28 mmol). Purification by silica flash chromatography (10:1 hexanes/EtOAc, 0.5 vol% Et<sub>3</sub>N) afforded **18** as a colorless oil (6.5 mg, 60%).

<sup>13</sup> CCDC 853922 contains the supplementary crystallographic data for this paper. These data can be obtained free of charge from The Cambridge Crystallographic Data Centre via [www.ccdc.cam.ac.uk/data\\_request/cif](http://www.ccdc.cam.ac.uk/data_request/cif).

**TLC:**  $R_f$  0.45 (4:1 hexanes/EtOAc). **IR** (NaCl, film): 2953 (s, C–H st), 2929 (s, C–H st), 2886 (m, C–H st), 2856 (m, C–H st), 1731 (vs, C=O st), 1496 (w), 1462 (w), 1363 (w), 1333 (w), 1255 (m, Si–Me  $\delta$  sy), 1221 (w, Si–Me  $\delta$  sy), 1185 (m), 1091 (m, C–O/Si–O st), 1018 (m, C–O/Si–O st), 986 (w), 930 (w), 871 (m), 836 (s, Si–C st), 778 (s, Si–C st).  **$^1\text{H-NMR}$**  (500 MHz):  $\delta$  7.35–7.30 (m, 4H), 7.29–7.27 (m, 1H), 5.88 (dd, 1H,  $J = 10.9, 2.3$ ), 4.29 (dd, 1H,  $J = 9.7, 4.6$ ), 2.61–2.52 (m, 3H), 2.47–2.40 (m, 1H), 2.24–2.16 (m, 2H), 2.01–1.94 (m, 1H), 1.85–1.78 (m, 1H), 1.63–1.57 (m, 1H), 1.16 (d, 3H,  $J = 7.2$ ), 0.83 (s, 9H), 0.02 (s, 3H), –0.01 (s, 3H).  **$^{13}\text{C-NMR}$**  (125 MHz):  $\delta$  210.3, 175.3, 139.7, 128.6, 128.2, 126.5, 76.5, 72.3, 43.4, 38.3, 37.1, 25.7, 18.2, 17.2, 14.6, –4.8, –5.0. **ESI-MS**  $m/z$  (rel int): (pos) 391.4 ( $[\text{M}+\text{H}]^+$ , 10), 413.3 ( $[\text{M}+\text{Na}]^+$ , 100), 803.7 ( $[\text{2M}+\text{Na}]^+$ , 70).

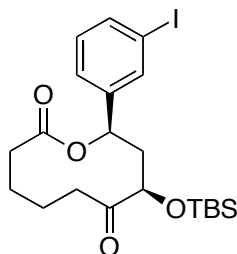

***cis*-8-(*tert*-Butyldimethylsilyloxy)-10-(3-iodophenyl)oxecane-2,7-dione (19).** Synthesized according to Protocol B from TBS-protected alcohol **S13** (60.0 mg, 0.128 mmol). Purification by silica flash chromatography (10:1 hexanes/EtOAc, 0.5 vol% Et<sub>3</sub>N) afforded **19** as colorless oil (44.9 mg, 70%).

**TLC:**  $R_f$  0.13 (10:1 hexanes/EtOAc). **IR** (NaCl, film): 2952 (s, C–H st), 2929 (s, C–H st), 2886 (m, C–H st), 2856 (m, C–H st), 1736 (vs, C=O st, shoulder at *ca.* 1710), 1592 (w), 1568 (w), 1472 (m), 1440 (w), 1425 (w), 1407 (w), 1362 (m), 1340 (w), 1253 (s, Si–Me  $\delta$  sy), 1230 (s), 1167 (m), 1119 (m, C–O/Si–O st), 1091 (m, C–O/Si–O st), 1055 (m, C–O/Si–O st), 1026 (m), 1014 (m), 976 (m), 956 (w), 837 (vs, Si–C st), 779 (s, Si–C st), 733 (w).  **$^1\text{H-NMR}$**  (500 MHz):  $\delta$  7.67 (s, 1H), 7.61 (d, 1H,  $J = 7.9$ ), 7.30 (d, 1H,  $J = 7.8$ ), 7.06 (t, 1H,  $J = 7.8$ ), 5.78 (dd, 1H,  $J = 10.0, 2.6$ ), 4.25 (dd, 1H,  $J = 9.1, 4.8$ ), 2.76 (dd, 1H,  $J = 18.9, 7.6$ ), 2.55–2.39 (m, 3H), 2.34–2.23 (m, 2H), 2.07–1.89 (m, 2H), 1.78–1.67 (m, 2H), 0.81 (s, 9H), 0.01 (s, 3H), –0.03 (s, 3H).  **$^{13}\text{C-NMR}$**  (125 MHz):  $\delta$  210.8, 171.7, 142.0, 137.1, 135.2, 130.3, 125.7, 94.4, 76.7, 71.3, 42.8, 38.1, 35.1, 25.7, 22.1, 18.1, –4.9, –5.1. **ESI-MS**  $m/z$  (rel int): (pos) 525.1 ( $[\text{M}+\text{Na}]^+$ , 100); (neg) 501.0 ( $[\text{M}-\text{H}]^-$ , 23), 740.9 (100).

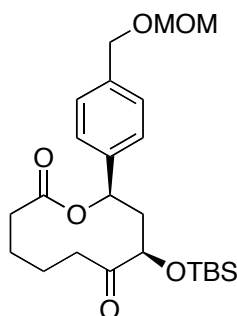

***cis*-8-(*tert*-Butyldimethylsilyloxy)-10-(4-((methoxymethoxy)methyl)phenyl)oxecane-2,7-dione (20).** Synthesized according to Protocol B from TBS-protected alcohol **S14** (14.7 mg,

0.0351 mmol). Purification by silica flash chromatography (10:1 hexanes/EtOAc, 0.5 vol% Et<sub>3</sub>N) afforded **20** as a colorless oil (11.3 mg, 71%).

**TLC:** *R<sub>f</sub>* 0.13 (9:1 hexanes/EtOAc). **IR** (NaCl, film): 3027 (w), 2953 (m, C–H st), 2931 (m, C–H st), 2887 (m, C–H st), 2859 (m, C–H st), 1736 (s, C=O st, shoulder at *ca.* 1715), 1474 (w), 1465 (w), 1442 (w), 1365 (w), 1256 (m, Si–Me  $\delta$  sy) 1233 (m, Si–Me  $\delta$  sy), 1169 (w), 1151 (m), 1106 (vs, C–O/Si–O st), 1051 (s, C–O/Si–O st) 1019 (m), 960 (w), 940 (w), 921 (w), 876 (m), 840 (s, Si–C st), 818 (w), 780 (m). **<sup>1</sup>H-NMR** (500 MHz):  $\delta$  7.33 (s, 4H), 5.84 (dd, 1H, *J* = 10.6, 2.1), 4.69 (s, 2H), 4.57 (s, 2H), 4.27 (dd, 1H, *J* = 10.1, 4.9), 3.40 (s, 3H), 2.73 (ddd, 1H, *J* = 18.2, 7.9, 2.1), 2.55 (dt, 1H, *J* = 14.3, 10.1), 2.51–2.43 (m, 2H), 2.28 (ddd, 1H, *J* = 17.4, 12.7, 2.3), 2.08–2.02 (m, 1H), 1.97–1.89 (m, 1H), 1.76–1.64 (m, 2H), 0.83 (s, 9H), 0.01 (s, 3H), –0.01 (s, 3H). **<sup>13</sup>C-NMR** (125 MHz):  $\delta$  210.9, 139.2, 138.1, 128.2, 126.7, 95.8, 72.1, 68.8, 55.5, 43.4, 38.4, 35.2, 25.8, 22.2, 18.2, –4.75, –4.88. **ESI-MS** *m/z* (rel int): (pos) 473.2 ([M+Na]<sup>+</sup>, 100).

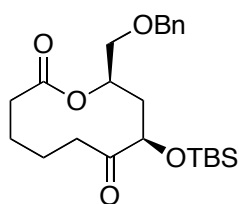

**cis-10-(Benzyloxymethyl)-8-(tert-butyltrimethylsilyloxy)oxecane-2,7-dione (21).** Synthesized by a modified version of Protocol B (10.5 mol% RuCl<sub>3</sub>) from TBS-protected alcohol **S15** (15.0 mg, 0.0386 mmol). Purification by silica flash chromatography (10:1 hexanes/EtOAc, 0.5 vol% Et<sub>3</sub>N) afforded **21** as colorless oil (8.9 mg, 55%).

**TLC:** *R<sub>f</sub>* 0.30 (10:1 hexanes/EtOAc). **IR** (NaCl, film): 2954 (s, C–H st), 2931 (s, C–H st), 2886 (m, C–H st), 2858 (s, C–H st), 1734 (vs, C=O st, slight shoulder at *ca.* 1710), 1453 (w), 1456 (w), 1366 (m), 1278 (m), 1254 (s, Si–Me  $\delta$  sy), 1239 (m), 1154 (m), 1126 (s, C–O/Si–O st), 1111 (s, C–O/Si–O st), 1073 (m, C–O/Si–O st), 1031 (m), 1008 (w), 963 (w), 937 (w), 890 (w), 839 (s), 815 (m), 782 (m), 740 (m), 699 (m). **<sup>1</sup>H-NMR** (500 MHz):  $\delta$  7.35–7.27 (m, 5H), 5.12 (m, 1H), 4.56–4.50 (m, 2H), 4.18 (dd, 1H, *J* = 6.7, 3.9), 3.82 (dd, 1H, *J* = 10.8, 7.8), 3.53 (dd, 1H, *J* = 10.8, 4.0), 2.66–2.61 (m, 1H), 2.54–2.45 (m, 2H), 2.34 (ddd, 1H, *J* = 18.2, 10.0, 2.1), 2.26 (ddd, 1H, *J* = 17.2, 12.5, 2.1), 2.05–1.95 (m, 2H), 1.88 (q, 1H, *J* = 13.1), 1.73–1.61 (m, 2H), 0.88 (s, 9H), 0.04 (s, 3H), 0.00 (s, 3H). **<sup>13</sup>C-NMR** (125 MHz):  $\delta$  210.4, 172.6, 138.0, 128.5, 127.8, 76.2, 73.3, 71.4, 37.0, 36.7, 35.1, 25.9, 22.3, 22.2, 18.3, –4.9, –5.2. **ESI-MS** *m/z* (rel int): (pos) 863.6 ([2M+Na]<sup>+</sup>, 100), 443.3 ([M+Na]<sup>+</sup>, 100), 421.3 ([M+H]<sup>+</sup>, 12); (neg) 419.4 ([M–H]<sup>–</sup>, 100).

---

## F. FUNCTIONALIZATION OF MACROCYCLIC SCAFFOLDS

### 1. CROSS-COUPLING REACTIONS OF IODIDE MACROCYCLE (19)

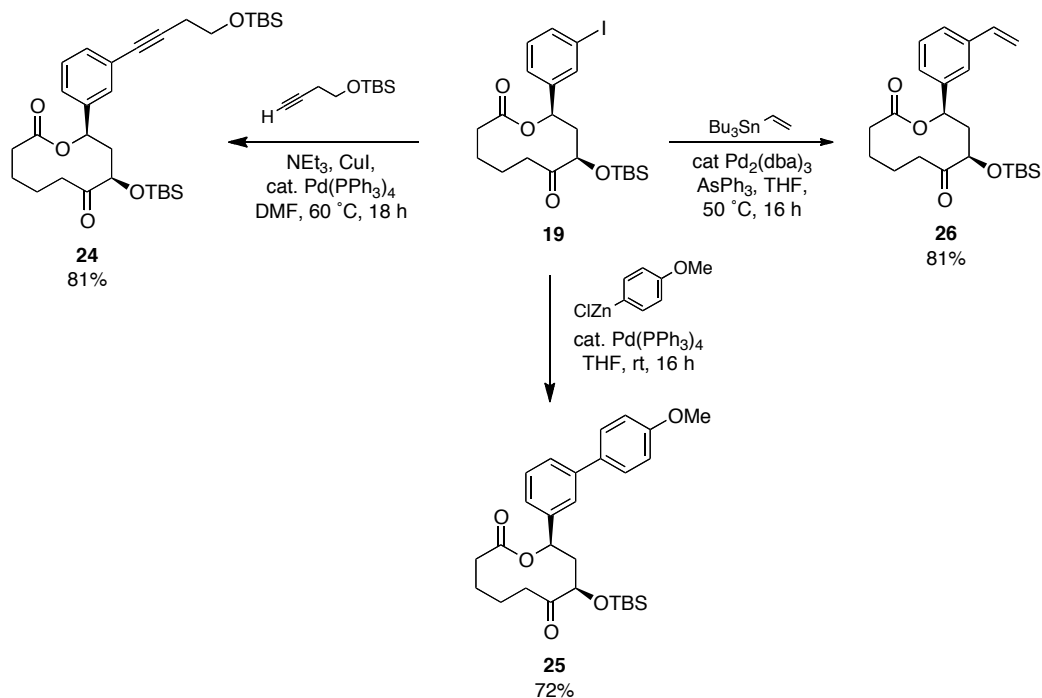

**Supplementary Figure 13. Cross-coupling reactions of iodide macrocycle 19.** Aryl iodide **19** underwent efficient Sonogashira, Negishi, and Stille cross-coupling reactions to introduce additional substituents. (dba = dibenzylideneacetone).

#### a. Sonogashira cross-coupling of iodide macrocycle 19

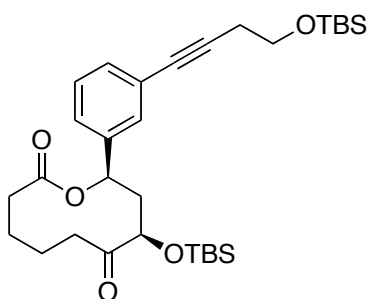

***cis*-8-(*tert*-Butyldimethylsilyloxy)-10-(3-(4-(*tert*-butyldimethylsilyloxy)but-1-ynyl)phenyl)-oxecane-2,7-dione (24).** In a 4 mL vial equipped with a septum and a magnetic stir bar, aryl iodide **19** (41.1 mg, 0.0818 mmol) was dissolved in DMF under Ar. Subsequently, CuI (6.2 mg, 0.033 mmol, 0.40 equiv), (but-3-yn-1-yl)tert-butyl dimethylsilyl ether (45.2 mg, 0.245 mmol, 3.00 equiv), and Et<sub>3</sub>N (0.06 mL, 0.4 mmol, *ca.* 5 equiv) were added. The vial was purged with Ar and Pd(PPh<sub>3</sub>)<sub>4</sub> (18.9 mg, 20.0 mol%) was added. The vial was purged again and sealed with a screw cap. The mixture was heated to 60 °C for 18 h until the reaction was complete as judged by TLC analysis (aliquots worked up with satd aq NH<sub>4</sub>Cl/one drop NH<sub>3</sub>/EtOAc, then eluted 5 times with 10:1 hexanes/EtOAc). The reaction mixture was poured into satd aq NH<sub>4</sub>Cl, a small amount of NH<sub>4</sub>OH was added, and the mixture was extracted with EtOAc (3×). The combined

organic extracts were washed with satd aq  $\text{NH}_4\text{Cl}$  and brine, dried ( $\text{MgSO}_4$ ), filtered, and concentrated by rotary evaporation. Purification by silica flash chromatography (10:1 hexanes/EtOAc, 0.5 vol%  $\text{Et}_3\text{N}$ ) afforded **24** as a colorless oil (37.0 mg, 81%).

**TLC:**  $R_f$  0.41 (4:1 hexanes/EtOAc). **IR** (NaCl, film): 2953 (m, C–H st), 2930 (s, C–H st), 2857 (m, C–H st), 1739 (s, shoulder at *ca.* 1710, C=O st), 1472 (w), 1463 (w), 1388 (w), 1362 (w), 1253 (s, Si–Me  $\delta$  sy), 1230 (m), 1187 (w), 1108 (vs, C–O/Si–O st), 1056 (m, C–O/Si–O st), 1025 (w), 1011 (w), 958 (w), 837 (vs, Si–C st), 777 (vs, Si–C st).  **$^1\text{H-NMR}$**  (500 MHz):  $\delta$  7.36–7.37 (m, 1H), 7.28–7.33 (m, 1H), 7.25–7.24 (m, 2H), 5.80 (dd, 1H,  $J = 10.6, 2.5$ ), 4.25 (dd, 1H,  $J = 9.5, 4.9$ ), 3.82 (d, 2H,  $J = 14.2$ ), 2.78–2.73 (m, 1H), 2.62 (d, 2H,  $J = 14.2$ ), 2.54–2.41 (m, 3H), 2.29 (ddd, 1H,  $J = 17.5, 12.7, 2.4$ ), 2.21 (ddd, 1H,  $J = 14.3, 4.9, 2.5$ ), 2.06–1.88 (m, 2H), 1.78–1.66 (m, 2H), 0.92 (s, 9H), 0.82 (s, 9H), 0.10 (s, 6H), 0.01 (s, 3H), –0.02 (s, 3H).  **$^{13}\text{C-NMR}$**  (125 MHz):  $\delta$  211.0, 139.9, 129.5, 128.6, 125.9, 124.2, 87.8, 81.4, 71.8, 62.0, 43.2, 38.3, 35.2, 26.1, 25.8, 24.0, 22.32, 22.17, 18.5, 18.2, –4.78, –4.91, –5.07. **ESI-MS**  $m/z$  (rel int): (pos) 581.2 ( $[\text{M}+\text{Na}]^+$ , 100), 313.1 ( $[\text{M}-\text{TBSOH}-\text{TBS}+\text{H}]^+$ , 28); (neg) 557.2 ( $[\text{M}-\text{H}]^-$ , 100).

### b. Negishi cross-coupling of iodide macrocycle **19**

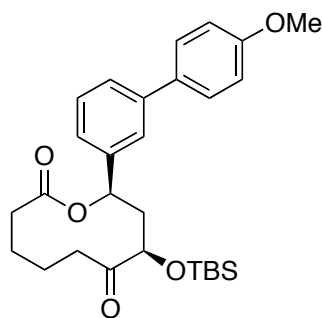

***cis*-8-(*tert*-Butyldimethylsilyloxy)-10-(4'-methoxybiphenyl-3-yl)oxecane-2,7-dione (**25**).** In a 4 mL vial equipped with a septum and a magnetic stir bar, aryl iodide **19** (35.0 mg, 0.070 mmol) was dissolved in THF under an Ar atmosphere. Subsequently,  $\text{Pd}(\text{PPh}_3)_4$  (4.0 mg, 5.0 mol%) was added and the vial was purged with Ar. (4-Methoxyphenyl)zinc(II) chloride (0.36 M in THF, 1.5 equiv; prepared by lithiation of the corresponding bromide ( $-78^\circ\text{C}$ , THF, 30 min) and subsequent transmetalation with  $\text{ZnCl}_2$  (1 M in THF,  $-78^\circ\text{C} \rightarrow \text{rt}$ , 1 h; concentration determined iodometrically<sup>14</sup>) and sealed with a screw cap. The mixture was stirred at rt for 16 h until the reaction was complete as judged by TLC analysis (aliquot worked up with satd aq  $\text{NH}_4\text{Cl}$ /EtOAc). Satd aq  $\text{NH}_4\text{Cl}$  was added and the mixture was extracted with EtOAc (3 $\times$ ). The combined organic extracts were washed with satd aq  $\text{NH}_4\text{Cl}$  and brine, dried ( $\text{MgSO}_4$ ), filtered, and concentrated by rotary evaporation. Purification by silica flash chromatography (10:1 hexanes/EtOAc, 0.5 vol%  $\text{Et}_3\text{N}$ ) afforded **25** as a colorless oil (24.0 mg, 72%).

**TLC:**  $R_f$  0.24 (4:1 hexanes/EtOAc). **IR** (NaCl, film): 2952 (m, C–H st), 2930 (m, C–H st), 2856 (m, C–H st), 1732 (s, shoulder at *ca.* 1710, C=O st), 1518 (m), 1484 (w), 1471 (w), 1463 (w), 1440 (w), 1408 (w), 1362 (w), 1275 (m), 1248 (vs, Si–Me  $\delta$  sy), 1233 (m), 1188 (m), 1167 (m), 1114 (m), 1090 (m), 1051 (m, C–O/Si–O st), 1029 (m), 957 (w), 939 (w), 910 (w), 883 (w), 836

<sup>14</sup> Krasovskiy, A.; Knochel, P *Synlett* **2006**, 5, 890.



(s, Si–C st), 795 (m), 778 (m, Si–C st), 732 (w), 704 (w).  $^1\text{H-NMR}$  (500 MHz):  $\delta$  7.53–7.50 (m, 3H), 7.46 (dt, 1H,  $J = 7.7, 1.3$ ), 7.38 (t, 1H,  $J = 7.7$ ), 7.29 (dt, 1H,  $J = 7.7, 1.3$ ), 7.00–6.97 (m, 2H), 5.91 (dd, 1H,  $J = 10.7, 2.3$ ), 4.30 (dd, 1H,  $J = 9.6, 4.9$ ), 3.86 (s, 3H), 2.78–2.73 (m, 1H), 2.62 (ddd, 1H,  $J = 14.3, 10.7, 9.6$ ), 2.54–2.45 (m, 2H), 2.33–2.25 (m, 2H), 2.09–2.03 (m, 1H), 2.00–1.92 (m, 1H), 1.77–1.65 (m, 2H), 0.83 (s, 9H), 0.01 (s, 3H), –0.01 (s, 3H).  $^{13}\text{C-NMR}$  (125 MHz):  $\delta$  210.8, 171.9, 159.3, 141.2, 140.1, 133.4, 129.0, 128.3, 126.6, 124.8, 124.7, 114.3, 72.3, 55.4, 43.3, 38.3, 35.1, 29.7, 25.7, 22.1, 18.1, –4.87, –5.01 (the TBS protected carbinol overlaps with the  $\text{CDCl}_3$  signal, but was identified by a HSQC experiment). **ESI-MS**  $m/z$  (rel int): (pos) 505.2 ( $[\text{M}+\text{Na}]^+$ , 100).

### c. Stille cross-coupling<sup>15</sup> of iodide macrocycle **19**

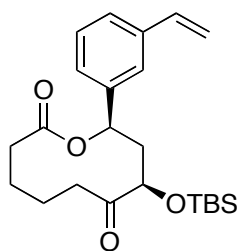

**cis-8-(tert-Butyldimethylsilyloxy)-10-(3-vinylphenyl)oxecane-2,7-dione (26).** In a 4 mL vial equipped with a septum and a magnetic stir bar, aryl iodide **19** (22.3 mg, 0.0444 mmol) was dissolved in THF (0.28 mL) under Ar.  $\text{AsPh}_3$  (1.1 mg, 8.0 mol%) was added, followed by  $\text{Pd}_2(\text{dba})_3$  (0.8 mg, 2 mol%). The vial was purged with Ar and the mixture stirred for 10 min at rt. Vinyltributyltin (*ca.* 13  $\mu\text{L}$ , *ca.* 1.0 equiv) was added and the mixture was stirred for 16 h at rt, followed by 18 h at 50 °C to ensure full conversion (the starting material and the product have identical  $R_f$  values). The mixture was cooled to rt, satd aq  $\text{NH}_4\text{Cl}$  was added, and the mixture was extracted with EtOAc (3 $\times$ ). The combined organic extracts were washed with 1 M HCl, water, and brine, dried ( $\text{MgSO}_4$ ), filtered, and concentrated by rotary evaporation. Purification by silica flash chromatography (hexanes/EtOAc, 10:1, 0.5 vol%  $\text{Et}_3\text{N}$ ) afforded **26** as a pale yellow oil (14.5 mg, 81%, *ca.* 95% purity by  $^1\text{H-NMR}$ , with minor impurities observed in the aromatic region).

**TLC:**  $R_f$  0.51 (4:1 hexanes/EtOAc). **IR** (NaCl, film): 2952 (m, C–H st), 2929 (m, C–H st), 2886 (w), 2857 (m, C–H st), 1735 (s, shoulder at *ca.* 1710, C=O st), 1518 (m), 1604 (w), 1471 (w), 1463 (w), 1442 (w), 1408 (w), 1363 (m), 1274 (m), 1253 (s, Si–Me  $\delta$  sy), 1230 (s), 1166 (m), 1116 (m), 1090 (m), 1055 (m, C–O/Si–O st), 1026 (m), 958 (w), 907 (w), 838 (s, Si–C st), 802 (m), 778 (s, Si–C st), 713 (w).  $^1\text{H-NMR}$  (500 MHz):  $\delta$  7.36 (s, 1H), 7.33 (d, 1H,  $J = 7.6$ ), 7.29 (t, 1H,  $J = 7.6$ ), 7.24 (d, 1H,  $J = 7.6$ ), 6.70 (dd, 1H,  $J = 17.5, 10.9$ ), 5.85 (dd, 1H,  $J = 10.6, 2.2$ ), 5.75 (d, 1H,  $J = 17.5$ ), 5.27 (d, 1H,  $J = 10.9$ ), 4.27 (dd, 1H,  $J = 9.8, 4.9$ ), 2.75 (ddd, 1H,  $J = 18.3, 8.0, 1.9$ ), 2.57 (ddd, 1H,  $J = 14.3, 10.6, 9.8$ ), 2.53–2.43 (m, 2H), 2.32–2.20 (m, 2H), 2.08–2.02 (m, 1H), 1.99–1.91 (m, 1H), 1.77–1.66 (m, 2H), 0.83 (s, 9H), 0.01 (s, 3H), –0.01 (s, 3H).  $^{13}\text{C-NMR}$  (125 MHz):  $\delta$  210.9, 171.9, 140.0, 138.0, 136.6, 128.9, 126.1, 126.0, 124.4, 114.6, 72.2, 43.3, 38.4, 35.2, 25.8, 22.2, 18.2, –4.77, –4.91 (the TBS protected carbinol overlaps with

<sup>15</sup> For  $\text{Ph}_3\text{As}$  promoted Stille couplings, see: Farina, V.; Krishnan, B. *J. Am. Chem. Soc.* **1991**, *113*, 9585.

the CDCl<sub>3</sub> signal, but was identified by an HSQC experiment). ESI-MS *m/z* (rel int): (pos) 425.2 ([M+Na]<sup>+</sup>, 100).

## 2. DIASTEREOSELECTIVE REDUCTIONS OF KETONE MACROCYCLES (15)

A variety of reduction conditions were investigated to effect stereoselective reduction of the ring ketone. While treatment with NaBH<sub>4</sub> resulted in no reaction, the more reactive L-Selectride tended to form very strong complexes with the resulting alcohol that complicated purification. However, the modified Luche conditions used in the reduction of the dihydropyrones (see SECTION D above) proved highly efficient and afforded the desired alcohols in good yield and excellent diastereoselectivity in most cases (**Supplementary Fig. 14**). Cerium chloride may facilitate reduction through activation of the ketone for the hydride attack.<sup>16</sup> Relative stereochemical configurations were determined by NOESY experiments on cyclic carbonate derivatives.

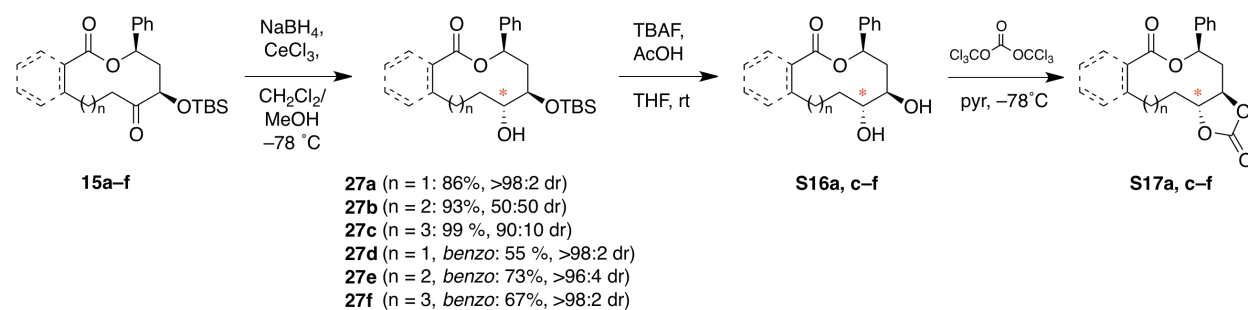

**Supplementary Figure 14. Diastereoselective reductions of ketone macrocycles 15a-f.** Cerium-mediated reduction of the ketone macrocycles **15a-f** afforded stereoselective access to alcohols **27a-f**. Relative stereochemical assignments were determined by deprotection of the TBS group and conversion of diols **S16a,c-f** to the corresponding cyclic carbonates (**S17a,c-f**), followed by NOESY analysis. As reduction of macrocycle **15b** gave a 50:50 mixture of diastereomers (**27b**), the corresponding cyclic carbonate was not prepared for this scaffold.

### a. General protocol for Luche reductions of ketone macrocycles 15a-f

In a roundbottom flask, ketone macrocycle **15** was dissolved in CH<sub>2</sub>Cl<sub>2</sub> (4.6 mL/mmol substrate; 0.22 M) and cooled to -78 °C. A solution of anhyd CeCl<sub>3</sub> (ca. 0.40 M in anhyd MeOH, 3.00 equiv) was added slowly and the mixture was stirred at -78 °C for an additional 20 min. Neat NaBH<sub>4</sub> (1.50 equiv) was added in one portion and the mixture was stirred at -78 °C until the reaction was complete as judged by TLC analysis (usually 2 h; aliquots added to a solution of one drop of 1,3-propanediol in EtOAc, then washed with satd aq NH<sub>4</sub>Cl). 1,3-propanediol (1.5–2.0 equiv) was added and the resulting mixture was allowed to warm to rt and stirred for an additional 15 min. After recooling to -78 °C, satd aq NH<sub>4</sub>Cl was added, and the mixture was allowed to warm to rt. Water and EtOAc were added and the mixture was thoroughly shaken in a separatory funnel. The organic layer was washed with water and brine, dried (MgSO<sub>4</sub>),

<sup>16</sup> For literature on cerium as an activator for carbonyls, see: a) Krasovskiy, A.; Kopp, F.; Knochel, P. *Angew. Chem. Int. Ed.* **2006**, *45*, 497; (b) Imamoto, T.; Sugiyura, Y.; Takiyama, N.; Hatojima, T.; Kamiya, Y. *J. Am. Chem. Soc.* **1989**, *111*, 4392; (c) Imamoto, T.; Takiyama, N.; Nakamura, K. *Tetrahedron Lett.* **1985**, *26*, 4763; (d) Imamoto, T.; Sugiyura, Y.; Takiyama, N. *Tetrahedron Lett.* **1984**, *25*, 4233.

filtered, and concentrated by rotary evaporation. Purification by silica flash chromatography afforded alcohol macrocycle **27**.

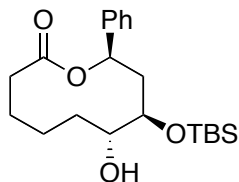

**(7R\*,8R\*,10R\*)-8-(tert-Butyldimethylsilyloxy)-7-hydroxy-10-phenyloxecan-2-one (27a)**. Synthesized from macrocycle **15a** (150 mg, 0.398 mmol).  $^1\text{H-NMR}$  analysis of the crude product indicated a single diastereomer ( $\geq 98:2$  dr). Purification by silica flash chromatography (10:1 hexanes/EtOAc, 0.5 vol%  $\text{Et}_3\text{N}$ ) afforded **27a** as a white solid (127 mg, 84%, single isomer).

**TLC**:  $R_f$  0.34 (4:1 hexanes/EtOAc). **mp** = 72.4–74.5 °C. **IR** (NaCl, film): 3552 (br, O–H st), 3090 (w), 3065 (w), 3034 (w), 2954 (s, C–H st), 2930 (s, C–H st), 2857 (m, C–H st), 1733 (vs, C=O st), 1497 (w), 1471 (w), 1462 (w), 1453 (w), 1362 (w), 1335 (w), 1261 (s, Si–Me  $\delta$  sy), 1232 (m), 1156 (w), 1110 (m), 1088 (s, C–OH/C–O/Si–O st), 1075 (s, C–OH/C–O/Si–O st), 1055 (s, C–OH/C–O/Si–O st), 1033 (s, C–OH/C–O/Si–O st), 967 (w), 938 (m), 873 (m), 836 (s, C–Si st), 778 (m), 699 (m).  $^1\text{H-NMR}$  (500 MHz):  $\delta$  7.36–7.27 (m, 5H), 5.85 (dd, 1H,  $J = 10.2, 2.6$ ), 3.98–3.95 (m, 1H), 3.63–3.60 (m, 1H), 2.84 (s, 1H), 2.58 (dt, 1H,  $J = 15.5, 4.3$ ), 2.32–2.20 (m, 2H), 2.16–2.06 (m, 2H), 1.98–1.90 (m, 1H), 1.74–1.67 (m, 1H), 1.60–1.54 (m, 1H), 1.47–1.33 (m, 2H), 0.84 (s, 9H), 0.09 (s, 3H), 0.03 (s, 3H).  $^{13}\text{C-NMR}$  (125 MHz):  $\delta$  173.1, 140.5, 128.6, 128.0, 126.2, 74.1, 73.8, 71.9, 34.9, 32.0, 25.7, 24.4, 20.8, 18.0, –4.4, –5.0. **ESI-MS**  $m/z$  (rel int): (pos) 401.1 ( $[\text{M}+\text{Na}]^+$ , 100) (neg) 377.1 ( $[\text{M}-\text{H}]^-$ ).

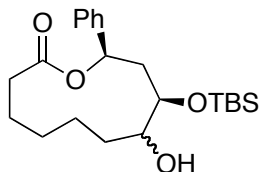

**(9R\*,11R\*)-9-(tert-Butyldimethylsilyloxy)-8-hydroxy-11-phenyloxacycloundecan-2-one (27b)**. Synthesized from macrocycle **15b** (26.0 mg, 0.0666 mmol).  $^1\text{H-NMR}$  analysis of the crude product indicated a 1:1 dr. Purification by silica flash chromatography (10:1→4:1 hexanes/EtOAc) afforded the individual isomers as colorless solids (**27b-1** = 11.7 mg, 45%; **27b-2** = 12.6 mg, 48%; relative stereochemistry not determined).

**27b-1**: **TLC**:  $R_f$  0.55 (4:1 hexanes/EtOAc). **mp** = 94.3–97.2 °C. **IR** (NaCl, film): 3623 (w, O–H st), 3065 (w), 3033 (w), 3008 (w), 2954 (s, C–H st), 2930 (s, C–H st), 2903 (m, C–H st), 2857 (m, C–H st), 1730 (vs, C=O st), 1497 (w), 1453 (m), 1403 (w), 1359 (w), 1274 (w), 1253 (s, Si–Me  $\delta$  sy), 1226 (m), 1215 (m), 1153 (m), 1073 (vs, C–OH/C–O/Si–O st), 1039 (m, C–OH/C–O/Si–O st), 996 (m), 936 (w), 867 (m), 836 (s, C–Si st), 810 (w), 878 (m), 761 (m), 699 (m).  $^1\text{H-NMR}$  (500 MHz):  $\delta$  7.37–7.28 (m, 5H), 6.27 (dd, 1H,  $J = 12.0, 2.1$ ), 3.77 (ddd, 1H,  $J = 7.7, 5.8, 1.5$ ), 3.63–3.59 (m, 1H), 2.68 (t, 1H,  $J = 2.0$ ), 2.53 (ddd, 1H,  $J = 16.0, 7.5, 1.7$ ), 2.30 (ddd, 1H,  $J = 15.9, 12.0, 5.8$ ), 2.22 (ddd, 1H,  $J = 16.0, 11.7, 1.7$ ), 2.15–2.06 (m, 1H), 1.95–1.85 (m, 2H), 1.74–1.57 (m, 4H), 1.52–1.46 (m, 1H), 1.15–1.08 (m, 1H), 0.92 (s, 9H), 0.21 (s, 3H),

0.18 (s, 3H).  $^{13}\text{C-NMR}$  (125 MHz):  $\delta$  173.3, 140.6, 128.8, 128.3, 126.2, 74.56, 74.51, 72.7, 44.1, 35.7, 28.6, 27.9, 26.0, 20.7, 19.0, 18.1, -3.6, -4.6. **ESI-MS**  $m/z$  (rel int): (pos) 393.2 ( $[\text{M}+\text{Na}]^+$ , 100); (neg) 391.3 ( $[\text{M}-\text{H}]^-$ , 100).

**27b-2**: **TLC**:  $R_f$  0.46 (4:1 hexanes/EtOAc). **mp** = 57.5–61.5 °C. **IR** (NaCl, film): 3500 (br, O–H st), 3089 (w), 3065 (w), 3034 (w), 2953 (s, C–H st), 2905 (s, C–H st), 2858 (s, C–H st), 1728 (vs, C=O st), 1495 (w), 1464 (m), 1387 (w), 1338 (w), 1307 (w), 1255 (s, Si–Me  $\delta$  sy), 1228 (m), 1161 (w), 1122 (w), 1074 (s, C–OH/C–O/Si–O st), 1050 (s, C–OH/C–O/Si–O st), 996 (m), 960 (w), 924 (w), 903 (w), 869 (m), 836 (s, C–Si st), 778 (m), 699 (m).  $^1\text{H-NMR}$  (500 MHz):  $\delta$  7.35–7.28 (m, 5H), 6.10 (dd, 1H,  $J$  = 11.8, 1.1), 3.92 (dt, 1H,  $J$  = 6.1, 2.1), 3.62 (br d, 1H,  $J$  = 10.3), 2.74 (ddd, 1H,  $J$  = 16.0, 11.8, 6.1), 2.56–2.52 (m, 1H), 2.29 (s, 1H), 2.20–2.06 (m, 2H), 1.99–1.91 (m, 1H), 1.69 (d, 1H,  $J$  = 16.0), 1.64–1.56 (m, 3H), 1.52–1.42 (m, 3H), 1.22–1.13 (m, 1H), 0.90 (s, 9H), 0.15 (s, 3H), 0.12 (s, 3H).  $^{13}\text{C-NMR}$  (125 MHz):  $\delta$  74.8, 74.5, 73.6, 40.2, 35.7, 28.4, 28.0, 26.0, 21.7, 20.1, 18.1, -4.2, -4.6. **ESI-MS**  $m/z$  (rel int): (pos) 410.3 ( $[\text{M}+\text{NH}_4]^+$ , 100), 393.2 ( $[\text{M}+\text{Na}]^+$ , 97); (neg) 391.1 ( $[\text{M}-\text{H}]^-$ , 100).

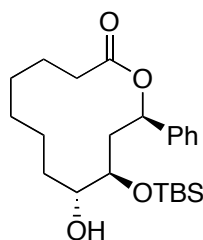

**(10R\*,12R\*)-10-(tert-Butyldimethylsilyloxy)-9-hydroxy-12-phenyloxacyclododecan-2-one (27c)**. Synthesized from macrocycle **15c** (27.0 mg, 0.0667 mmol).  $^1\text{H-NMR}$  analysis of the crude product indicated 90:10 dr. Purification by silica flash chromatography (10:1 hexanes/EtOAc, 0.5 vol%  $\text{Et}_3\text{N}$ ) afforded the major isomer **27c-1** (24.4 mg, 90%). The minor isomer (**27c-2**) was also isolated in low purity, but was identifiable by diagnostic signals in the NMR and mass spectra.

**27c-1**: **TLC**:  $R_f$  0.70 (4:1 hexanes/EtOAc). **mp** = 65.6–67.5 °C. **IR** (NaCl, film): 3556 (w, O–H st), 3090 (w), 3065 (w), 3034 (w), 2950 (s, C–H st), 2932 (vs, C–H st), 2857 (m, C–H st), 1464 (w), 1403 (w), 1361 (w), 1254 (m, Si–Me  $\delta$  sy), 1213 (w), 1175 (w), 1142 (m), 1105 (m), 1069 (s, C–OH/C–O/Si–O st), 1052 (s, C–OH/C–O/Si–O st), 1033 (m), 1005 (w), 957 (w), 935 (w), 885 (w), 837 (s, C–Si st), 776 (m), 699 (m).  $^1\text{H-NMR}$  (500 MHz):  $\delta$  7.36–7.27 (m, 5H), 5.97 (dd, 1H,  $J$  = 12.0, 2.1), 3.92–3.88 (m, 1H), 3.75 (d, 1H,  $J$  = 8.5), 2.60 (ddd, 1H,  $J$  = 15.1, 12.0, 8.5), 2.47 (ddd, 1H,  $J$  = 14.2, 10.7, 3.6), 2.35–2.30 (m, 2H), 1.86–1.80 (m, 1H), 1.72–1.45 (m, 8H), 1.42–1.36 (m, 2H), 1.28–1.23 (m, 1H), 0.89 (s, 9H), 0.13 (s, 3H), 0.12 (s, 3H).  $^{13}\text{C-NMR}$  (125 MHz): 173.6, 140.9, 128.7, 128.2, 126.3, 75.3, 74.3, 71.0, 42.3, 33.4, 33.1, 25.9, 24.8, 23.9, 23.8, 22.1, 18.1, -4.0, -4.6. **ESI-MS**  $m/z$  (rel int): (pos) 424.3 ( $[\text{M}+\text{NH}_4]^+$ , 76), 407.2 ( $[\text{M}+\text{H}]^+$ , 100); (neg) 405.2 ( $[\text{M}-\text{H}]^-$ , 100).

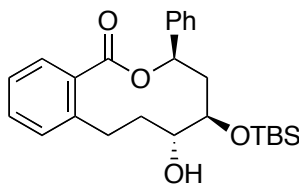

**(3R\*,5R\*,6R\*)-5-(tert-Butyldimethylsilyloxy)-6-hydroxy-3-phenyl-3,4,5,6,7,8-hexahydro-1H-benzo[c]oxecin-1-one (27d)**. Synthesized from macrocycle **15d** (50.0 mg, 0.118 mmol). <sup>1</sup>H-NMR analysis of the crude product indicated a single diastereomer ( $\geq 98:2$  dr). Purification by silica flash chromatography (2:1→1:1 hexanes/EtOAc, 0.5 vol% Et<sub>3</sub>N) afforded **27d** as a white solid (28.0 mg, 56%).

**TLC**:  $R_f$  0.49 (4:1 hexanes/EtOAc). **mp** = 115.6–118.8 °C. **IR** (NaCl, film): 3580 (br, O–H st), 3089 (w), 3065 (w), 3032 (w), 2953 (m, C–H st), 2929 (m, C–H st), 2885 (w, C–H st), 2857 (m, C–H st), 1727 (vs, C=O st), 1603 (w), 1461 (w), 1451 (w), 1391 (w), 1362 (w), 1336 (w), 1283 (m), 1257 (s, Si–Me  $\delta$  sy), 1131 (m), 1113 (w), 1070 (s, C–OH/C–O/Si–O st), 1055 (m, C–OH/C–O/Si–O st), 1029 (w), 1007 (w), 982 (w), 938 (w), 908 (w), 887 (m), 860 (m), 837 (s, C–Si st), 811 (w), 778 (m), 751 (m), 735 (m), 698 (m). **<sup>1</sup>H-NMR** (500 MHz):  $\delta$  7.48 (dd, 1H,  $J$  = 7.6, 1.0), 7.41–7.32 (m, 6H), 7.28 (d, 1H,  $J$  = 7.6), 7.24 (dd, 1H,  $J$  = 7.5, 0.9), 5.97 (dd, 1H,  $J$  = 11.9, 2.3), 4.05 (t, 1H,  $J$  = 7.7), 3.68 (t, 1H,  $J$  = 6.6), 2.87–2.80 (m, 2H), 2.72 (ddd, 1H,  $J$  = 13.6, 9.0, 4.3), 2.36 (ddd, 1H,  $J$  = 15.5, 11.9, 7.7), 2.30–2.25 (m, 1H), 2.19–2.12 (m, 1H), 1.95 (dd, 1H,  $J$  = 15.5, 2.3), 0.94 (s, 10H), 0.22 (s, 3H), 0.21 (s, 3H). **<sup>13</sup>C-NMR** (125 MHz):  $\delta$  168.8, 141.5, 140.0, 133.2, 131.3, 130.7, 128.9, 128.4(3), 128.4(1), 126.3, 125.9, 77.1, 75.3, 73.8, 43.8, 33.0, 29.5, 25.9, 18.1, –3.7, –4.5. **ESI-MS**  $m/z$  (rel int): (pos) 449.1 ([M+Na]<sup>+</sup>, 100); (neg) 425.1 ([M–H]<sup>–</sup>, 100).

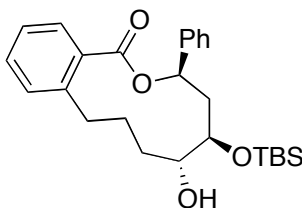

**(3R\*,5R\*)-5-(tert-Butyldimethylsilyloxy)-6-hydroxy-3-phenyl-4,5,6,7,8,9-hexahydrobenzo[c][1]oxacycloundecin-1(3H)-one (27e)**. Synthesized from macrocycle **15e** (25.6 mg, 0.0584 mmol). <sup>1</sup>H-NMR analysis of the crude product indicated a 96:4 dr. Purification by silica flash chromatography (10:1→4:1 hexanes/EtOAc, 0.5 vol% Et<sub>3</sub>N) afforded **27e** as a colorless solid (18.6 mg, 73%; 96:4 mixture of isomers).

**TLC**:  $R_f$  0.47 (4:1 hexanes/EtOAc, major diastereomer). **mp** = 140.1–142.0 °C. **IR** (NaCl, film): 3517 (br, O–H st), 3064 (w), 3032 (w), 2952 (m, C–H st), 2930 (m, C–H st), 2884 (w, C–H st), 2857 (m, C–H st), 1706 (s, C=O st), 1601 (w), 1497 (w), 1471 (w), 1462 (w), 1448 (w), 1407 (w), 1361 (w), 1312 (w), 1273 (s, Si–Me  $\delta$  sy), 1250 (vs, Si–Me  $\delta$  sy), 1123 (m), 1081 (s, C–OH/C–O/Si–O st), 1050 (s, C–OH/C–O/Si–O st), 1026 (m), 983 (w), 943 (w), 906 (w), 884 (w), 864 (w), 837 (s, C–Si st), 808 (w), 778 (m), 750 (m), 698 (m). **<sup>1</sup>H-NMR** (500 MHz):  $\delta$  7.96 (d, 1H,  $J$  = 7.7), 7.43–7.33 (m, 5H), 7.29–7.24 (m, 5H), 6.28 (dd, 1H,  $J$  = 11.5, 3.8), 4.05–3.96 (m, 2H), 3.66–3.61 (m, 1H), 2.99 (d, 1H,  $J$  = 5.8), 2.63–2.51 (m, 2H), 2.08 (dd, 1H,  $J$  = 15.4, 3.8), 1.91–1.97 (m, 1H), 1.72 (m, 2H), 1.69–1.77 (m, 1H), 0.91 (s, 9H), 0.20 (s, 3H), 0.13 (s,

3H).  $^{13}\text{C-NMR}$  (125 MHz):  $\delta$  168.4, 144.0, 140.7, 133.2, 132.7, 131.4, 129.4, 128.8, 128.1, 126.5, 126.2, 77.0, 73.4, 70.6, 44.7, 34.3, 33.0, 27.5, 25.9, 18.1, -3.8, -4.7. **ESI-MS**  $m/z$  (rel int): (pos) 463.1 ( $[\text{M}+\text{Na}]^+$ , 100) (neg) 439.1 ( $[\text{M}-\text{H}]^-$ , 100).

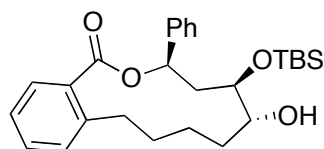

**(3R\*,5R\*,6R\*)-5-(tert-Butyldimethylsilyloxy)-6-hydroxy-3-phenyl-3,4,5,6,7,8,9,10-octahydro-1H-benzo[c][1]oxacyclododecin-1-one (27f)**. Synthesized from macrocycle **15f** (10.3 mg, 0.0228 mmol).  $^1\text{H-NMR}$  analysis of the crude product indicated a single diastereomer ( $\geq 98:2$  dr). Purification by silica flash chromatography (first column: 10:1 hexanes/EtOAc, 0.5 vol%  $\text{Et}_3\text{N}$ ; second column: 20:1  $\rightarrow$  10:1 hexanes/EtOAc, 0.5 vol%  $\text{Et}_3\text{N}$ ) afforded **27f** as a colorless resin (7.1 mg, 68%,  $>90\%$  purity).

**TLC**:  $R_f$  0.15 (20:1 hexanes/EtOAc). **IR** (NaCl, film): 3571 (br, O-H st), 3088 (w), 3065 (w), 3031 (w), 2951 (m, C-H st), 2929 vs, C-H st), 2856 (m, C-H st), 1710 (s, C=O st), 1601 (w), 1495 (w), 1461 (w), 1447 (w), 1389 (w), 1360 (w), 1311 (w), 1253 (vs, Si-Me  $\delta$  sy), 1196 (w), 1124 (m), 1096 (s, C-OH/C-O/Si-O st), 1071 (s, C-OH/C-O/Si-O st), 1049 (m, C-OH/C-O/Si-O st), 1028 (m), 1007 (w), 973 (w), 936 (w), 909 (w), 865 (m), 836 (m, C-Si st), 808 (w), 778 (m), 748 (m), 698 (m).  $^1\text{H-NMR}$  (500 MHz):  $\delta$  7.70 (dd, 1H,  $J = 7.8, 1.3$ ), 7.42–7.20 (m, 8H), 6.27 (dd, 1H,  $J = 11.6, 2.0$ ), 4.00 (dt, 1H,  $J = 7.2, 4.2$ ), 3.64–3.61 (m, 1H), 3.34–3.28 (m, 1H), 2.75–2.70 (m, 1H), 2.56 (d, 1H,  $J = 3.5$ ), 2.45 (ddd, 1H,  $J = 15.7, 11.6, 4.4$ ), 1.92 (ddd, 1H,  $J = 15.7, 4.2, 2.0$ ), 1.80–1.65 (m, 5H), 1.50–1.42 (m, 1H), 0.92 (s, 9H), 0.21 (s, 3H), 0.16 (s, 3H).  $^{13}\text{C-NMR}$  (125 MHz):  $\delta$  168.7, 143.4, 140.9, 132.0, 131.2, 130.8, 130.8, 128.8, 128.2, 126.1, 126.0, 75.6, 73.5, 73.4, 43.5, 31.9, 31.5, 29.2, 26.0, 21.8, 18.3, -3.7, -4.4. **ESI-MS**  $m/z$  (rel int): (pos) 477.0 ( $[\text{M}+\text{Na}]^+$ , 100) (neg) 453.2 ( $[\text{M}-\text{H}]^-$ , 100).

#### ***b. General protocol for deprotection of mono-TBS-protected diol macrocycles 27a,c-f***

In a roundbottom flask, TBS-protected alcohol **27** was dissolved in THF (93.0 mL/mmol). A freshly prepared solution of TBAF and AcOH (*ca.* 1.0 M each in THF, 2.0 equiv) was added and the resulting solution was stirred at the temperature indicated below until the reaction was complete as judged by TLC analysis. The solvents were removed by rotary evaporation. Purification by silica flash chromatography afforded diol **S16**.

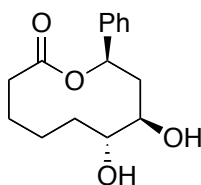

**(7R\*,8R\*,10R\*)-7,8-dihydroxy-10-phenyloxecan-2-one (S16a)**. Synthesized from TBS-protected alcohol **27a** (150 mg, 0.396 mmol). The reaction proceeded at rt in 1 h. Purification by silica flash chromatography (10:1 hexanes/EtOAc, 0.5 vol%  $\text{Et}_3\text{N}$ ) afforded **S16a** as a white, crystalline solid (64.5 mg, 61%).

**TLC:**  $R_f$  0.67 (EtOAc).  **$^1\text{H-NMR}$**  (500 MHz):  $\delta$  7.40–7.27 (m, 5H), 5.89 (dd, 1H,  $J = 8.4, 2.7$ ), 4.00–3.96 (m, 1H), 3.60–3.56 (m, 1H), 2.63 (ddd, 1H,  $J = 15.2, 5.6, 2.7$ ), 2.40–2.13 (m, 6H), 1.96–1.89 (m, 1H), 1.75–1.70 (m, 1H), 1.55–1.39 (m, 3H).  **$^{13}\text{C-NMR}$**  (125 MHz):  $\delta$  172.9, 140.2, 128.7, 128.0, 125.8, 73.8, 73.7, 72.6, 34.6, 31.9, 24.6, 20.8. **ESI-MS**  $m/z$  (rel int): (pos) 551.1 ( $[\text{2M}+\text{Na}]^+$ , 20), 287.1 ( $[\text{M}+\text{Na}]^+$ , 100); (neg) 527.2 ( $[\text{2M}-\text{H}]^-$ , 100), 263.0 ( $[\text{M}-\text{H}]^-$ , 50).

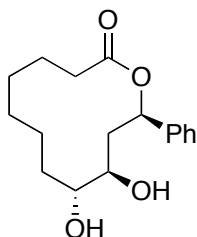

**(9R\*,10R\*,12R\*)-9,10-Dihydroxy-12-phenyloxacyclododecan-2-one (S16c).** Synthesized from TBS-protected alcohol **27c** (16.0 mg, 0.0393 mmol). The reaction proceeded at rt in 1 h. Purification by silica flash chromatography (10:1 hexanes/EtOAc, 0.5 vol% Et<sub>3</sub>N) afforded **S16c** as a white solid (11.0 mg, 97%).

**TLC:**  $R_f$  0.72 (EtOAc).  **$^1\text{H-NMR}$**  (500 MHz):  $\delta$  7.36–7.27 (m, 5H), 6.09 (dd, 1H,  $J = 11.3, 1.9$ ), 3.84–3.82 (m, 1H), 3.68–3.65 (m, 1H), 2.63 (s, 1H), 2.44–2.27 (m, 4H), 1.87 (ddd, 1H,  $J = 15.0, 4.8, 1.9$ ), 1.80–1.36 (m, 11H).  **$^{13}\text{C-NMR}$**  (125 MHz):  $\delta$  174.0, 140.5, 128.7, 128.2, 126.3, 74.5, 71.8, 71.5, 42.4, 34.0, 30.8, 25.03, 24.86, 24.0, 20.7. **ESI-MS**  $m/z$  (rel int): (pos) 315.3 ( $[\text{M}+\text{Na}]^+$ , 100); (neg) 291.3 ( $[\text{M}-\text{H}]^-$ , 100).

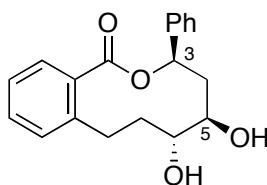

**(3R\*,5R\*,6R\*)-5,6-Dihydroxy-3-phenyl-3,4,5,6,7,8-hexahydro-1H-benzo[*c*]oxecin-1-one (S16d).** Synthesized from TBS-protected alcohol **27d** (14.3 mg, 0.335 mmol). The reaction proceeded at rt in 1.75 h. Filtration through a short plug of silica gel (10:1 hexanes/EtOAc, 0.5 vol% Et<sub>3</sub>N) afforded **S16d** as a white solid (11.2 mg, > quant, 80–85% purity). In addition to some aliphatic impurities,  $^1\text{H-NMR}$  analysis revealed an impurity (*ca.* 5%) with signals that may correspond to the product of a transesterification involving the C5-alcohol. The diagnostic benzylic proton (C3) is observed at 5.1 ppm in this impurity. The diol was used in the next step without further purification.

**TLC:**  $R_f$  0.66 (EtOAc).  **$^1\text{H-NMR}$**  (500 MHz):  $\delta$  7.53 (dd, 1H,  $J = 7.9, 1.4$ ), 7.40 (td, 1H,  $J = 7.5, 1.4$ ), 7.36–7.30 (m, 5H), 7.24–2.27 (m, 3H), 5.96 (dd, 1H,  $J = 11.8, 2.4$ ), 4.08 (t, 1H,  $J = 8.0$ ), 3.73 (ddd, 1H,  $J = 8.0, 5.8, 2.0$ ), 2.88–2.82 (m, 1H), 2.75 (ddd, 1H,  $J = 13.4, 9.8, 3.3$ ), 2.42–2.36 (m, 1H), 2.32 (ddd, 1H,  $J = 15.4, 11.8, 8.1$ ), 2.22–2.15 (m, 1H), 2.10 (dd, 1H,  $J = 15.4, 2.4$ ).  **$^{13}\text{C-NMR}$**  (125 MHz):  $\delta$  168.5, 141.5, 132.9, 131.5, 130.6, 129.0, 128.8, 128.4, 126.5, 126.0, 76.9, 76.3, 73.0, 42.7, 33.9, 29.6, 14.3. **ESI-MS**  $m/z$  (rel int): (pos) 647.1 ( $[\text{2M}+\text{Na}]^+$ , 25), 334.9 ( $[\text{M}+\text{Na}]^+$ , 100); (neg) 311.0 ( $[\text{M}-\text{H}]^-$ , 100).

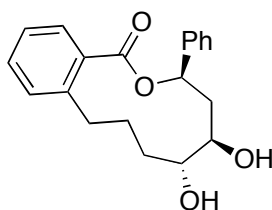

**(3R\*,5R\*)-5,6-Dihydroxy-3-phenyl-4,5,6,7,8,9-hexahydrobenzo[c][1]oxacycloundecin-1(3H)-one (S16e).** Synthesized from TBS-protected alcohol **27e** (9.1 mg, 0.021 mmol). The reaction proceeded at rt in 1.75 h. Purification by silica flash chromatography (EtOAc) afforded **S16e** as a white solid (8.6 mg, > quant, 95:5 mixture of isomers, *ca.* 90% purity, containing traces of TBAF).

**TLC:**  $R_f$  0.66 (EtOAc). **<sup>1</sup>H-NMR** (500 MHz):  $\delta$  8.02 (dd, 1H,  $J = 7.8, 1.3$ ), 7.46–7.35 (m, 5H), 7.31–7.27 (m, 3H), 6.37 (dd, 1H,  $J = 9.5, 3.4$ ), 3.98 (ddd,  $J = 7.6, 4.7, 4.6$ , 1H), 3.86 (ddd, 1H,  $J = 7.6, 4.6, 3.3$ ), 3.59 (ddd, 1H,  $J = 13.1, 7.6, 5.0$ ), 2.75 (dt, 1H,  $J = 13.1, 7.6$ ), 2.50 (ddd, 1H,  $J = 15.7, 9.5, 4.9$ ), 2.26 (dd, 1H,  $J = 15.2, 3.2$ ), 2.05–1.90 (m, 2H), 1.67–1.60 (m, 2H). **<sup>13</sup>C-NMR** (125 MHz):  $\delta$  167.9, 144.0, 140.1, 133.0, 132.8, 131.7, 129.4, 128.9, 128.1, 126.5, 125.8, 76.2, 73.9, 72.1, 41.7, 34.9, 32.0, 26.9. **ESI-MS**  $m/z$  (rel int): (pos) 675.1 ( $[2M+Na]^+$ , 30), 349.0 ( $[M+Na]^+$ , 100); (neg) 324.9 ( $[M-H]^-$ , 100).

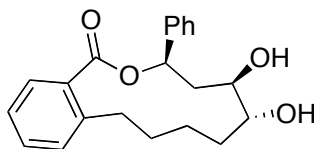

**(3R\*,5R\*,6R\*)-5,6-Dihydroxy-3-phenyl-3,4,5,6,7,8,9,10-octahydro-1H-benzo[c][1]oxacyclododecin-1-one (S16f).** Synthesized from TBS-protected alcohol **27f** (7.0 mg, 0.015 mmol). TBAF was added at 0 °C and the resulting solution was stirred with warming to rt for 1 h. Purification by silica flash chromatography (10:1 hexanes/EtOAc, 0.5 vol% Et<sub>3</sub>N) afforded **S16f** as a white solid (3.8 mg, 72%; 95:5 mixture of isomers, *ca.* 90% purity).

**TLC:**  $R_f$  0.51 (EtOAc). **<sup>1</sup>H-NMR** (500 MHz):  $\delta$  7.77 (dd, 1H,  $J = 7.8, 1.3$ ), 7.44–7.22 (m, 8H), 6.30 (dd, 1H,  $J = 10.9, 1.9$ ), 3.96–3.93 (m, 1H), 3.70–3.67 (m, 1H), 3.46 (ddd, 1H,  $J = 12.7, 10.0, 6.2$ ), 2.66–2.60 (m, 2H), 2.41 (ddd, 1H,  $J = 15.6, 10.9, 2.6$ ), 2.36 (s, 1H), 2.02 (ddd, 1H,  $J = 15.6, 6.1, 1.9$ ), 1.89–1.66 (m, 6H), 1.49–1.41 (m, 1H). **<sup>13</sup>C-NMR** (125 MHz):  $\delta$  168.6, 147.9, 143.2, 140.5, 132.2, 131.4, 131.2, 130.5, 128.8, 126.2, 126.0, 75.4, 73.8, 72.0, 41.9, 32.6, 32.0, 28.2, 21.6. **ESI-MS**  $m/z$  (rel int): (pos) 703.1 ( $[2M+Na]^+$ , 45), 363.0 ( $[M+Na]^+$ , 100); (neg) 679.2 ( $[2M-H]^-$ , 35), 339.0 ( $[M-H]^-$ , 100).

### *c. General protocol for synthesis of cyclic carbonates S17a,c–f and NOESY analysis*

In a roundbottom flask or flame-dried 4 mL vial equipped with a septum cap, diol macrocycle **S16** was dissolved in CH<sub>2</sub>Cl<sub>2</sub> (3.0 mL/mmol), and pyridine (6.0 equiv) was added. The resulting solution was cooled to –78 °C, and a solution of triphosgene (0.5 equiv) in CH<sub>2</sub>Cl<sub>2</sub> (0.25 M) was added dropwise and the mixture was stirred at the temperature indicated below until the reaction



was complete as judged by TLC analysis. Satd aq  $\text{NH}_4\text{Cl}$  was added the mixture warmed to rt and extracted with EtOAc (3 $\times$ ). The combined organic extracts were washed with 1 M HCl, satd aq  $\text{NaHCO}_3$ , and brine, dried ( $\text{MgSO}_4$ ), filtered, and concentrated by rotary evaporation. Purification by silica flash chromatography carbonate **S17**.

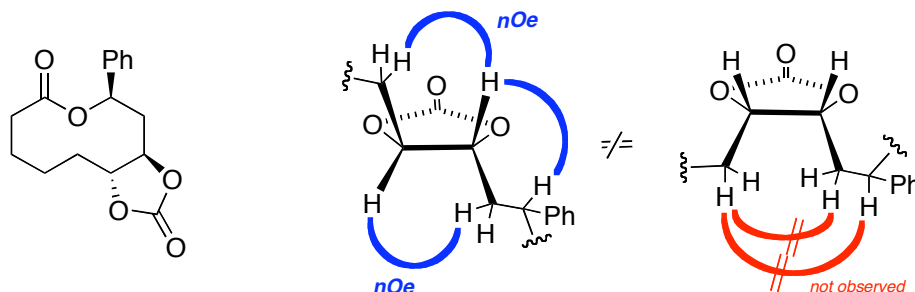

**(3aR\*,5R\*,11aR\*)-5-Phenylhexahydro-3aH-[1,3]dioxolo[4,5-d]oxecine-2,7(8H)-dione (S17a)**. Synthesized from diol macrocycle **S16a** (20.0 mg, 0.0757 mmol). The reaction proceeded at  $-78\text{ }^\circ\text{C}$  in 4 h. Purification by silica flash chromatography (4:1 hexanes/EtOAc) afforded **S17a** as a white solid (12.0 mg, 54%).

**TLC:**  $R_f$  0.12 (4:1 hexanes/EtOAc).  **$^1\text{H-NMR}$**  (500 MHz):  $\delta$  7.42–7.35 (m, 5H), 5.92 (dd, 1H,  $J = 8.6, 6.2$ ), 4.86 (ddd, 1H,  $J = 7.6, 6.2, 3.3$ ), 4.43 (td, 1H,  $J = 7.6, 5.9$ ), 2.64 (ddd, 1H,  $J = 16.7, 4.9, 3.3$ ), 2.48–2.54 (m, 2H), 2.29 (ddd, 1H,  $J = 16.7, 13.2, 3.2$ ), 2.14–2.04 (m, 2H), 2.01–1.93 (m, 1H), 1.83–1.76 (m, 1H), 1.64 (ddt, 1H,  $J = 15.7, 12.3, 3.3$ ), 1.57–1.48 (m, 1H).  **$^{13}\text{C-NMR}$**  (125 MHz):  $\delta$  154.1, 138.7, 129.0, 128.9, 126.3, 81.5, 80.7, 73.2, 40.8, 34.5, 31.6, 24.9, 20.0. **ESI-MS**  $m/z$  (rel int): (pos) 603.0 ( $[2\text{M}+\text{Na}]^+$ , 97), 312.9 ( $[\text{M}+\text{Na}]^+$ , 100).

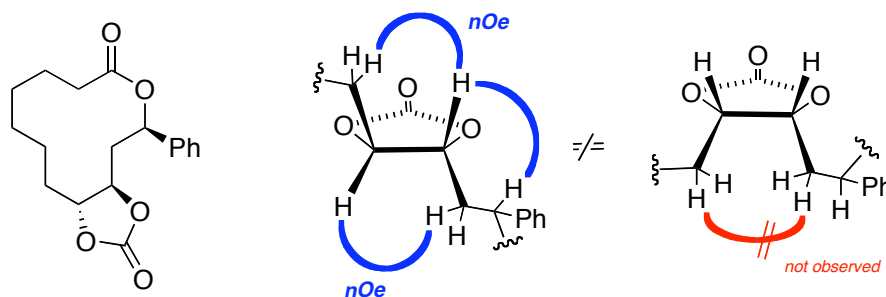

**(3aR\*,5R\*,13aR\*)-5-Phenyloctahydro-3aH-[1,3]dioxolo[4,5-d][1]oxacyclododecine-2,7(8H)-dione (S17c)**. Synthesized from diol macrocycle **S16c** (10.0 mg, 0.0342 mmol). After stirring for 2.75 h at  $-78\text{ }^\circ\text{C}$ , the reaction was warmed to  $-20\text{ }^\circ\text{C}$  and stirred at this temperature overnight to reach complete conversion. Purification by silica gel chromatography (4:1 hexanes/EtOAc) afforded **S17c** as a white solid (7.2 mg, 68%). Some aliphatic impurities remained, but did not affect NMR structure determination.

**TLC:**  $R_f$  0.32 (4:1 hexanes/EtOAc).  **$^1\text{H-NMR}$**  (500 MHz):  $\delta$  7.37–7.30 (m, 5H), 5.79 (d, 1H,  $J = 11.2$ ), 4.81 (ddd, 1H,  $J = 8.8, 6.1, 2.6$ ), 4.43 (ddd, 1H,  $J = 10.0, 6.1, 3.6$ ), 2.56–2.44 (m, 2H), 2.36–2.28 (m, 2H), 1.94–1.84 (m, 2H), 1.76–1.66 (m, 2H), 1.62–1.41 (m, 6H).  **$^{13}\text{C-NMR}$**  (125 MHz):  $\delta$  172.7, 154.3, 140.1, 129.0, 128.7, 126.0, 81.1, 79.9, 73.5, 40.9, 32.5, 31.9, 23.8,

23.1, 22.6, 21.6. **ESI-MS**  $m/z$  (rel int): (pos) 659.6 ( $[2M+Na]^+$ , 50), 341.3 ( $[M+Na]^+$ , 100); (neg) 317.2 ( $[M-H]^-$ , 100).

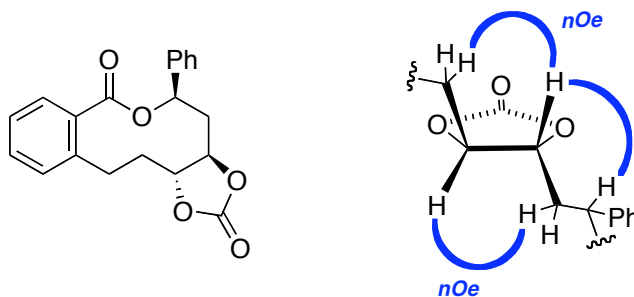

**(3aR\*,5R\*,11aR\*)-5-Phenylhexahydro-3aH-[1,3]dioxolo[4,5-d]oxecine-2,7(8H)-dione (S17d)**. Synthesized from diol macrocycle **S16d** (11.2 mg, 0.0359 mmol). After the addition of triphosgene at  $-78^\circ\text{C}$ , the mixture was warmed to  $-20^\circ\text{C}$  and stirred for 12 h. TLC analysis showed considerable amounts of remaining starting material, thus, another portion of triphosgene (5.3 mg, 0.50 equiv) was added and the mixture was stirred at  $0^\circ\text{C}$  for 2 d, after which TLC analysis showed full conversion of the starting material. Purification by silica flash chromatography (20:1 $\rightarrow$ 10:1 $\rightarrow$ 4:1 hexanes/EtOAc) afforded **S17d** as a white solid (5.4 mg, 44%, 85–90% purity)

**TLC**:  $R_f$  0.21 (4:1 hexanes/EtOAc).  **$^1\text{H-NMR}$**  (500 MHz):  $\delta$  7.48 (td, 1H,  $J = 7.5, 1.4$ ), 7.43–7.36 (m, 7H), 7.30 (td, 1H,  $J = 7.5, 1.0$ ), 5.94–5.91 (m, 1H), 4.87 (dt, 1H,  $J = 11.8, 3.6$ ), 4.69–4.66 (m, 1H), 3.04 (ddd, 1H,  $J = 14.3, 5.3, 3.5$ ), 2.60 (td, 1H,  $J = 14.3, 2.8$ ), 2.48–2.40 (m, 3H), 2.12 (dddd, 1H,  $J = 14.1, 11.8, 5.3, 2.7$ ).  **$^{13}\text{C-NMR}$**  (125 MHz):  $\delta$  167.9, 138.6, 138.1, 133.3, 131.5, 130.6, 129.1, 129.0, 127.3, 127.1, 126.0, 81.8, 79.9, 75.9, 40.8, 36.0, 28.8. **ESI-MS**  $m/z$  (rel int): (pos) 699.1 ( $[2M+Na]^+$ , 50), 360.9 ( $[M+Na]^+$ , 100); (neg) 555.2 (100), 337.0 ( $[M-H]^-$ , 39).

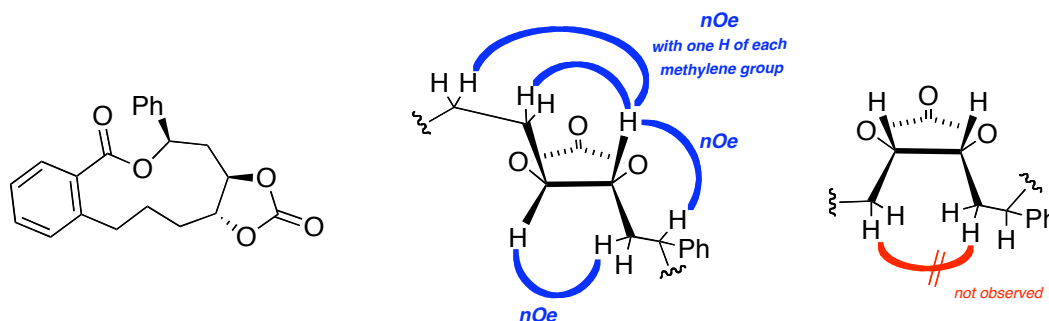

**(3aR\*,5R\*,14aR\*)-5-Phenyl-4,5,12,13,14,14a-hexahydrobenzo[c][1,3]dioxolo[4,5-h][1]oxacycloundecine-2,7(3aH)-dione (S17e)**. Synthesized from diol macrocycle **S16e** (8.6 mg, 0.026 mmol). After the addition of triphosgene at  $-78^\circ\text{C}$ , the reaction mixture was warmed to  $-20^\circ\text{C}$  and stirred for 12 h. Satd aq  $\text{NaHCO}_3$  was added and the mixture was extracted with EtOAc (3 $\times$ ). The combined organic extracts were washed with brine, dried ( $\text{MgSO}_4$ ), filtered, and concentrated by rotary evaporation. Purification by silica flash chromatography (4:1 hexanes/EtOAc) afforded **S17e** as a white solid (5.7 mg, 62%, 85–90% purity)

**TLC:**  $R_f$  0.36 (4:1 hexanes/EtOAc, major diastereomer).  **$^1\text{H-NMR}$**  (500 MHz):  $\delta$  7.93 (dd, 1H,  $J = 7.8, 1.3$ ), 7.47–7.24 (m, 8H), 6.15 (dd, 1H,  $J = 11.8, 4.1$ ), 4.98 (dt, 1H,  $J = 11.0, 4.2$ ), 4.64 (ddd, 1H,  $J = 9.4, 4.2, 1.0$ ), 3.68–3.62 (m, 1H), 2.65–2.51 (m, 3H), 2.17–2.11 (m, 1H), 2.03–1.95 (m, 1H), 1.92–1.86 (m, 1H), 1.65–1.57 (m, 1H).  **$^{13}\text{C-NMR}$**  (125 MHz):  $\delta$  167.8, 154.0, 142.5, 139.7, 133.5, 133.2, 131.3, 129.0, 128.7, 128.6, 127.0, 125.9, 83.0, 79.1, 76.6, 43.8, 33.3, 32.6, 26.9. **ESI-MS**  $m/z$  (rel int): 375.2 ( $[\text{M}+\text{Na}]^+$ , 100); (neg) 387.4 ( $[\text{M}+\text{Cl}]^-$ , 100), 350.9 ( $[\text{M}-\text{H}]^-$ , 65).

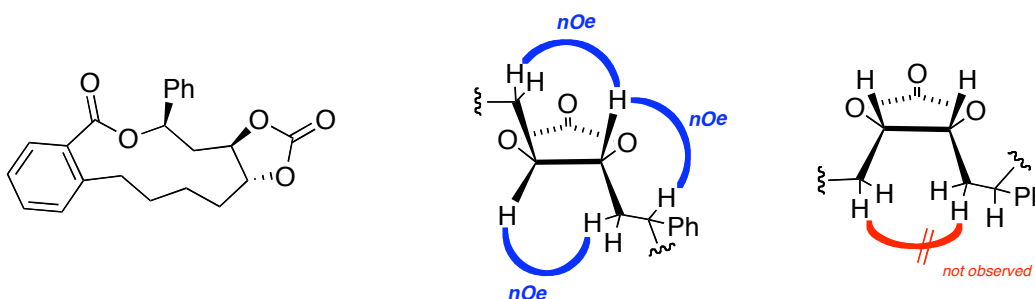

**(3aR\*,5R\*,15aR\*)-Phenyl-4,5,13,14,15,15a-hexahydro-3aH-benzo[*c*][1,3]dioxolo[4,5-*i*][1]-oxacyclododecine-2,7(12*H*)-dione (S17f).** Synthesized from diol macrocycle **S16f** (3.3 mg, 9.7  $\mu\text{mol}$ ). After the addition of triphosgene at  $-78\text{ }^\circ\text{C}$ , the reaction mixture was warmed to  $-20\text{ }^\circ\text{C}$  and stirred for 12 h. Satd aq  $\text{NaHCO}_3$  was added and the mixture was extracted with EtOAc (3 $\times$ ). The combined organic extracts were washed with brine, dried ( $\text{MgSO}_4$ ), filtered, and concentrated by rotary evaporation. Purification by silica flash chromatography (4:1 hexanes/EtOAc) afforded **S17f** as a colorless solid (3.1 mg, 87%, 85–90% purity; aliphatic impurities observed in  $^1\text{H}$ - and  $^{13}\text{C}$ -NMR spectra)

**TLC:**  $R_f$  0.13 (10:1 hexanes/EtOAc, double elution).  **$^1\text{H-NMR}$**  (500 MHz):  $\delta$  7.50–7.39 (m, 6H), 7.32–7.23 (m, 8H), 6.20 (dd, 1H,  $J = 10.8, 1.8$ ), 4.55 (ddd, 1H,  $J = 9.6, 8.0, 3.7$ ), 4.44–4.40 (m, 1H), 3.18 (ddd, 1H,  $J = 14.0, 10.0, 5.9$ ), 2.80 (dt, 1H,  $J = 14.0, 5.1$ ), 2.59–2.47 (m, 2H), 1.83–1.68 (m, 5H), 1.00–0.94 (m, 1H).  **$^{13}\text{C-NMR}$**  (125 MHz):  $\delta$  168.6, 154.2, 140.4, 139.6, 132.9, 131.5, 130.2, 129.2, 129.0, 127.9, 126.2, 125.9, 84.3, 81.1, 73.6, 40.6, 31.3, 29.1, 28.3, 23.6. **ESI-MS**  $m/z$  (rel int): 389.2 ( $[\text{M}+\text{Na}]^+$ , 100).

### 3. HYDROBORATION–OXIDATION AND EPOXIDATION OF METHYLENATED MACROCYCLE (23a)

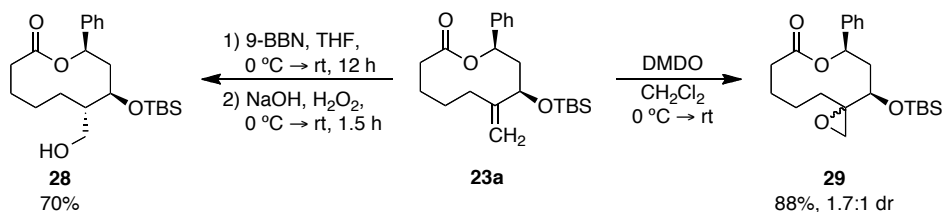

**Supplementary Figure 15. Epoxidation and hydroboration–oxidation of methylenated macrocycle 23a.** The olefin of macrocycle **23a** (synthesized as described in SECTION G below) was functionalized by stereoselective hydroboration–oxidation with 9-BBN and  $\text{NaOH}/\text{H}_2\text{O}_2$  to afford primary alcohol **28** or epoxidation with DMDO to afford spiroepoxide **29**. The relative stereochemistry of **28** was determined by NOESY analysis of the corresponding cyclic carbonate (**28'b**), prepared as follows: **28**  $\rightarrow$  **28'a** (TBAF, THF,  $0\text{ }^\circ\text{C} \rightarrow \text{rt}$ , 12 h)  $\rightarrow$  **28'b** (CDI, DMAP,  $\text{CH}_2\text{Cl}_2$ , rt, 2 h).

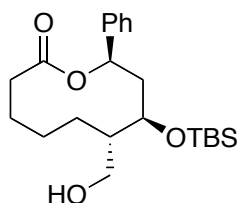

**(8R\*,10R\*)-8-(tert-Butyldimethylsilyloxy)-7-(hydroxymethyl)-10-phenyloxecan-2-one (28).**

In a flame-dried, Ar-flushed 4 mL vial equipped with stir bar and septum cap, methylenated macrocycle **23a** (20 mg, 0.054 mmol) was dissolved in THF (0.50 mL) and cooled to 0 °C. 9-BBN (0.5 M in THF; 0.20 mL, 0.096 mmol, 1.8 equiv) was added via syringe, and the mixture was allowed to warm to rt, then stirred overnight. The reaction was cooled to 0 °C and 6 N NaOH (54  $\mu$ L, 0.032 mmol, 6.0 equiv) was added, followed by 30% H<sub>2</sub>O<sub>2</sub> (54  $\mu$ L, 1 mL/mmol substrate). The reaction was warmed to rt and stirred for 1.5 h. The reaction was diluted with water and the aqueous phase was extracted with Et<sub>2</sub>O (3 $\times$ ). The combined organic extracts were washed with brine, dried (MgSO<sub>4</sub>), filtered, and concentrated by rotary evaporation. Purification by silica flash chromatography (6:1 hexanes/EtOAc; 0.5 vol% Et<sub>3</sub>N) afforded **28** as a light yellow oil (14.7 mg, 70%;  $\geq$ 98:2 dr).

**TLC:**  $R_f$  0.28 (4:1 Hexanes/EtOAc). **IR** (NaCl, film): 3549 (m, O–H st), 3467 (m, O–H st), 2953 (s, C–H st), 2930 (vs, C–H st), 2883 (m, C–H st), 2858 (m, C–H st), 1732 (vs, C=O st), 1497 (w), 1471 (w), 1463 (w), 1407 (w), 1389 (w), 1362 (w), 1336 (w), 1252 (vs, Si–Me), 1234 (m), 1213 (w), 1156 (m), 1112 (m), 1061 (s), 1027 (s), 1004 (m), 935 (m), 867 (m), 837 (s), 776 (s), 699 (m). **<sup>1</sup>H-NMR** (500 MHz):  $\delta$  7.35 (d, 4H,  $J = 4.2$ ), 7.30 (dt, 1H,  $J = 8.4, 4.2$ ), 5.89 (dd, 1H,  $J = 11.6, 2.4$ ), 3.71 (ddd, 1H,  $J = 9.7, 5.7, 2.0$ ), 3.62–3.50 (m, 2H), 3.15 (dd, 1H,  $J = 10.2, 3.0$ ), 2.60–2.56 (m, 1H), 2.46 (ddd, 1H,  $J = 14.5, 11.6, 9.8$ ), 2.35–2.29 (m, 1H), 2.24–2.10 (m, 2H), 2.04–1.99 (m, 1H), 1.74–1.62 (m, 2H), 1.55–1.46 (m, 1H), 1.43–1.36 (m, 1H), 1.26–1.17 (m, 1H), 1.07 (ddt, 1H,  $J = 14.9, 11.6, 3.2$ ), 0.88 (s, 9H), 0.12 (s, 3H), 0.08 (s, 3H). **<sup>13</sup>C-NMR** (125 MHz):  $\delta$  173.2, 140.5, 128.6, 128.0, 126.1, 74.3, 65.1, 47.5, 44.4, 35.1, 27.5, 25.8, 25.4, 22.7, 20.4, 17.9, -4.6, -4.9. **ESI-MS**  $m/z$  (rel int): (pos) 415 ([M+Na]<sup>+</sup>, 100).

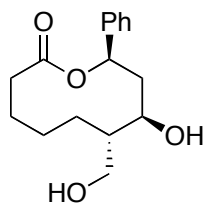

**(7S\*,8R\*,10R\*)-8-Hydroxy-7-(hydroxymethyl)-10-phenyloxecan-2-one (28'a).** In a 10 mL roundbottom flask, TBS-protected alcohol **28** (72.0 mg, 0.183 mmol) was dissolved in THF (2.5 mL) and the resulting solution was cooled to 0 °C. TBAF (1.0 M in THF, 0.275 mL, 0.275 mmol, 1.5 equiv) was added dropwise and the reaction mixture was warmed to rt over 3 h. The reaction was diluted with satd aq NH<sub>4</sub>Cl and extracted with EtOAc (3 $\times$ ). The combined organic extracts were washed with brine, dried (MgSO<sub>4</sub>), filtered, and concentrated by rotary evaporation. Purification by silica flash chromatography (1:1 hexanes/EtOAc) afforded **28'a** as a clear oil (40 mg, 79%).

**TLC:**  $R_f$  0.15 (1:1 Hexanes/EtOAc).  **$^1\text{H-NMR}$**  (500 MHz):  $\delta$  7.37 (dt, 4H,  $J = 17.6, 8.3$ ), 7.28 (t, 1H,  $J = 8.3$ ), 5.93 (t, 1H,  $J = 5.2$ ), 3.74–3.71 (m, 2H), 3.62–3.58 (m, 1H), 2.64–2.58 (m, 1H), 2.32 (d, 2H,  $J = 5.2$ ), 2.25–2.18 (m, 3H), 1.71–1.62 (m, 2H), 1.48–1.45 (m, 1H), 1.22–1.19 (m, 1H), 1.06–1.00 (m, 1H).  **$^{13}\text{C-NMR}$**  (125 MHz):  $\delta$  174.3, 141.5, 129.9, 129.1, 127.0, 77.3, 75.1, 66.4, 45.1, 44.2, 36.1, 31.5, 26.7, 21.7. **ESI-MS**  $m/z$  (rel int): (pos) 301 ( $[\text{M}+\text{Na}]^+$ , 100); (neg) 277 ( $[\text{M}-\text{H}]^-$ , 100).

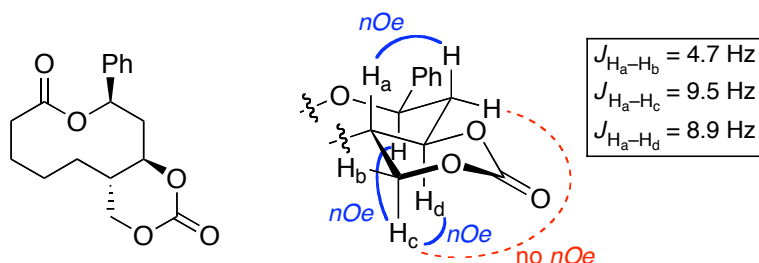

**(4aS\*,11R\*,12aR\*)-11-Phenyloctahydro-[1,3]dioxino[4,5-d]oxecine-2,9(11H)-dione (28'b).** In a 25 mL roundbottom flask, diol **28'a** (2.0 mg, 7.2  $\mu\text{mol}$ ) was dissolved in  $\text{CH}_2\text{Cl}_2$  (1.0 mL). To this solution, 1,1'-carbonyldiimidazole (2.4 mg, 14.4  $\mu\text{mol}$ , 2 equiv) and DMAP (cat.) were added sequentially and the reaction was allowed to stir for 2.5 h at rt. The reaction was diluted with sat aq  $\text{NH}_4\text{Cl}$  and the solution was extracted with  $\text{CH}_2\text{Cl}_2$  (3 $\times$ ). The combined organic extracts were washed with brine, dried ( $\text{MgSO}_4$ ), filtered, and concentrated by rotary evaporation. Purification by silica flash chromatography (1:1 hexanes/EtOAc) afforded **28'b** as a colorless film (1.5 mg, 68%).

**TLC:**  $R_f$  0.41 (1:2 Hexanes/EtOAc).  **$^1\text{H-NMR}$**  (500 MHz):  $\delta$  7.38–7.34 (m, 4H), 7.31 (ddd, 1H,  $J = 9.0, 5.8, 2.7$ ), 5.90 (dd, 1H,  $J = 9.8, 3.1$ ), 4.34 (td, 1H,  $J = 8.9, 3.5$ ), 4.28 (dd, 1H,  $J = 10.8, 4.7$ ), 3.95 (dd, 1H,  $J = 10.8, 9.5$ ), 2.64 (ddd, 1H,  $J = 15.8, 4.8, 3.3$ ), 2.53 (dddd, 1H,  $J = 11.8, 9.3, 6.8, 2.3$ ), 2.49–2.41 (m, 2H), 2.26 (ddd, 1H,  $J = 15.8, 12.8, 2.9$ ), 2.20–2.10 (m, 1H), 1.76–1.64 (m, 2H), 1.61–1.55 (m, 1H), 1.46 (dtd, 1H,  $J = 15.5, 7.8, 3.5$ ), 1.37–1.29 (m, 1H).  **$^{13}\text{C-NMR}$**  (125 MHz):  $\delta$  173.1, 150.6, 139.7, 129.3, 129.0, 126.5, 84.0, 73.9, 69.9, 36.1, 35.1, 26.5, 25.9, 20.9, **ESI-MS**  $m/z$  (rel int): (pos) 327 ( $[\text{M}+\text{Na}]^+$ , 100).

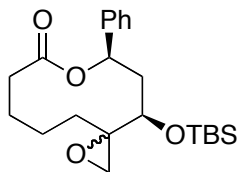

**(4R\*,6R\*)-4-(tert-Butyldimethylsilyloxy)-6-phenyl-1,7-dioxaspiro[2.9]dodecan-8-one (29).** In a flame-dried, Ar-flushed 4 mL vial equipped with stir bar and septum cap, methylenated macrocycle **23a** (5.0 mg, 0.013 mmol) was dissolved in  $\text{CH}_2\text{Cl}_2$  (0.50 mL) and cooled to 0  $^\circ\text{C}$ . DMDO (0.073 M in acetone; 0.28 mL, 0.024 mmol, 1.8 equiv) was added via syringe, and the mixture was allowed to warm to rt, then stirred at rt for 4 h, after which TLC analysis revealed the appearance of a new spot, as well as unreacted starting material. Thus, the solution was cooled to 0  $^\circ\text{C}$  and additional DMDO (0.073 M in acetone; 0.28 mL, 0.024 mmol, 1.8 equiv) was

added via syringe, and the mixture was allowed to warm to rt overnight, then concentrated by rotary evaporation. Purification by silica flash chromatography (15:1 hexanes/EtOAc; 0.5 vol% Et<sub>3</sub>N) afforded **29** as a colorless film (4.6 mg, 88%; 1.7:1 dr).

**TLC:** *R<sub>f</sub>* 0.42 (4:1 Hexanes/EtOAc). **IR** (NaCl, film): 2953 (s, C–H st), 2928 (vs, C–H st), 2886 (m, C–H st), 2856 (m, C–H st), 1733 (vs, C=O st), 1496 (w), 1472 (w), 1461 (w), 1348 (w), 1251 (vs, Si–Me), 1217 (s), 1159 (w), 1141 (w), 1090 (s), 1060 (s), 1026 (m), 956 (w), 900 (w), 867 (m), 837 (s), 777 (s), 699 (m). **<sup>1</sup>H-NMR** (500 MHz): δ 7.40–7.39 (m, 2H-major, 2H-minor), 7.37–7.33 (m, 2H-major, 2H-minor), 7.31–7.28 (m, 1H-major, 1H-minor), 5.88–5.84 (m, 1H-major, 1H-minor), 3.66–3.59 (m, 1H-major), 3.54–3.50 (m, 1H-minor), 2.83–2.77 (m, 2H-major), 2.61–2.50 (m, 2H-major, 4H-minor), 2.43–2.37 (m, 1H-minor), 2.30–2.20 (m, 3H-minor), 2.17–2.06 (m, 2H-major), 2.02–1.80 (m, 3H-major, 1H-minor), 1.77–1.62 (m, 2H-major, 2H-minor), 1.24–1.14 (m, 1H-major), 1.08–0.98 (m, 1H-minor), 0.87 (s, 9H-major), 0.84 (s, 9H-minor), 0.08 (s, 3H-major), 0.03 (s, 3H-major), 0.02 (s, 3H-minor), 0.01 (s, 3H-minor). **<sup>13</sup>C-NMR** (125 MHz): δ 172.7, 172.6, 140.9, 140.3, 128.6, 128.5, 128.2, 127.9, 126.4, 126.3, 75.7, 72.9, 72.5, 62.0, 58.9, 50.6, 49.5, 41.9, 41.6, 35.6, 35.4, 28.2, 27.2, 25.7, 25.6, 24.9, 24.2, 22.3, 21.0, 18.1, 17.9, –4.6, –4.7, –4.8, –5.1. **ESI-MS** *m/z* (rel int): (pos) 413 ([M+Na]<sup>+</sup>, 100). The ratio of diastereomers was determined based on the <sup>1</sup>H-NMR signals for the carbinol protons of the TBS-protected alcohol: 3.66–3.59 (m, 1H-major) and 3.54–3.50 (m, 1H-minor).

#### 4. DEPROTECTION AND ACYLATION OF TBS-PROTECTED ALCOHOL MACROCYCLE (**15a**)

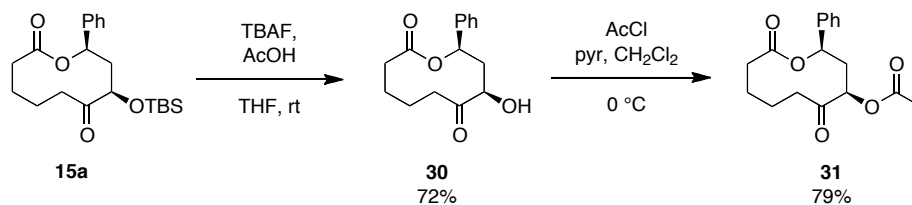

**Supplementary Figure 16. Deprotection and acylation of the TBS-protected alcohol in macrocycle 15a.** TBS-protected alcohol **15a** was deprotected to unveil the secondary alcohol, which could then be acylated efficiently.

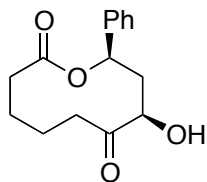

***cis*-8-Hydroxy-10-phenyloxecane-2,7-dione (**30**).** TBS-protected alcohol **15a** (20.0 mg, 0.396 mmol) was dissolved in THF (5.0 mL), and a freshly prepared solution of TBAF and AcOH (*ca.* 1.0 M each in THF, 0.11 mL, 2.0 equiv) was added and the resulting solution was allowed to stir at rt for 3.5 h. The solvents were removed by rotary evaporation. Purification by silica flash chromatography (2:1 hexanes/EtOAc, 0.5 vol% Et<sub>3</sub>N) afforded **30** as a colorless oil that solidified over time (10.0 mg, 72%).

**TLC:**  $R_f$  0.36 (1:1 hexanes/EtOAc). **IR** (NaCl, film): 3436 (br, O–H st), 3064 (w), 3033 (w), 2930 (m, C–H st), 2874 (m, C–H st), 1721 (s, C=O st), 1603 (w), 1496 (w), 1451 (w), 1421 (w), 1370 (w), 1336 (w), 1311 (w), 1296 (m), 1252 (m), 1231 (w), 1168 (m), 1102 (w), 1046 (m, C–OH/C–O st), 1020 (m), 956 (w), 935 (w), 862 (m), 840 (w), 810 (w).  **$^1\text{H-NMR}$**  (500 MHz):  $\delta$  7.36–7.27 (m, 5H), 5.97 (dd, 1H,  $J = 7.5, 3.3$ ), 4.27 (td, 1H,  $J = 7.5, 4.1$ ), 2.95 (d, 1H,  $J = 7.5$ ), 2.71 (ddd, 1H,  $J = 18.4, 13.1, 3.3$ ), 2.63–2.55 (m, 2H), 2.47–2.32 (m, 3H), 2.28–2.11 (m, 2H), 1.69–1.64 (m, 1H), 1.55–1.48 (m, 1H).  **$^{13}\text{C-NMR}$**  (125 MHz):  $\delta$  211.1, 172.5, 139.4, 128.6, 128.0, 125.9, 74.9, 72.8, 42.3, 37.0, 34.6, 22.4, 20.5. **ESI-MS**  $m/z$  (rel int): (pos) 285.0 ( $[\text{M}+\text{Na}]^+$ , 100), 547.3 ( $[\text{2M}+\text{Na}]^+$ , 25) (neg) 261.2 ( $[\text{M}-\text{H}]^-$ , 15), 297.2 ( $[\text{M}+\text{Cl}]^-$ , 100), 559.5 ( $[\text{2M}+\text{Cl}]^-$ , 30).

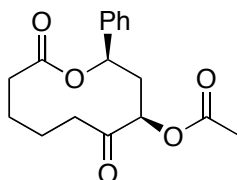

***cis*-5,10-Dioxo-2-phenyloxecan-4-yl acetate (31).** Macrocyclic alcohol **30** (21.5 mg, 0.082 mmol) was dissolved in pyridine (0.50 mL) and  $\text{CH}_2\text{Cl}_2$  (0.50 mL) and cooled to 0 °C. Acetyl chloride (0.06 mL, *ca.* 10 equiv) was added dropwise; at the end of the addition, rapid formation of a white precipitate was observed and the reaction was complete as judged by TLC analysis (aliquot worked up with satd aq  $\text{NaHCO}_3/\text{EtOAc}$ ). Satd aq  $\text{NaHCO}_3$  was added, followed by water to dissolve the precipitate, and the mixture was extracted with EtOAc (3 $\times$ ). The combined organic extracts were washed with water (2 $\times$ ), satd aq  $\text{NH}_4\text{Cl}$ , and brine, dried ( $\text{MgSO}_4$ ) and concentrated by rotary evaporation. Purification by silica flash chromatography (10:1 hexanes/EtOAc, 0.5 vol%  $\text{Et}_3\text{N}$ ) afforded **31** as a white, crystalline solid (19.6 mg, 79%).

**TLC:**  $R_f$  0.64 (1:1 hexanes/EtOAc). **IR** (NaCl, film): 2932 (w, C–H st), 1729 (vs, shoulder at *ca.* 1740, C=O st), 1452 (w), 1438 (w), 1426 (w), 1372 (w), 1274 (m), 1238 (s, Si–Me  $\delta$  sy), 1166 (m), 1051 (m, C–O/Si–O st), 1027 (m), 960 (w), 937 (w), 913 (w), 901 (w), 841 (w), 809 (w), 762 (w), 700 (m).  **$^1\text{H-NMR}$**  (500 MHz):  $\delta$  7.35–7.30 (m, 5H), 5.96 (dd, 1H,  $J = 11.4, 2.3$ ), 4.95 (dd, 1H,  $J = 11.0, 3.6$ ), 2.75–2.60 (m, 3H), 2.53 (ddd, 1H,  $J = 16.6, 5.9, 2.5$ ), 2.30–2.17 (m, 3H), 2.14–2.03 (m, 1H), 2.01 (s, 3H), 1.60 (m, 1H,  $J = 5.6, 2.8$ ), 1.50–1.42 (m, 1H).  **$^{13}\text{C-NMR}$**  (125 MHz):  $\delta$  206.7, 172.6, 170.5, 139.1, 128.8, 128.6, 126.4, 76.4, 72.7, 39.7, 38.9, 34.6, 22.3, 20.5, 20.4. **ESI-MS**  $m/z$  (rel int): (pos) 631.2 ( $[\text{M}+\text{2Na}]^+$ , 95), 327.1 ( $[\text{M}+\text{Na}]^+$ , 100), 309.1 ( $[\text{M}-\text{O}+\text{Na}]^+$ , 93).

---

## G. SYNTHESIS OF RELATED SECO-ACIDS (22a–d, S22)

### 1. SYNTHESIS OF SECO-ACIDS (22a–d)

Attempts to saponify macrolactones **15a–d** directly to **S18** using various literature procedures literature (*e.g.*, LiOH, NaOH) proved unsuccessful, as either no reaction or decomposition occurred (**Supplementary Fig. 17**). Presuming that the reactivity of the  $\alpha$ -siloxy ketones was the origin of these problems, the ketones were olefinated using Petasis' reagent (for some substrates, partial olefination of the ester function was observed as a side reaction). Subsequent hydrolysis using either LiOH in MeOH or Me<sub>3</sub>SnOH in toluene afforded the *seco*-acid cyclization precursors **22a–d**. Consistent with our inability to access **S18** by saponification of **15a–d**, numerous attempts at oxidative cleavage of the methylene group of **22a–d** also failed; ozonolysis resulted in the formation of at least three side products and the desired *seco*-acid could not be successfully isolated from the crude mixture; ruthenium-catalyzed oxidation protocols led to complex mixtures. Thus, we presume **S18** to be inherently unstable, making direct macrocyclization to **15a–d** unfeasible.

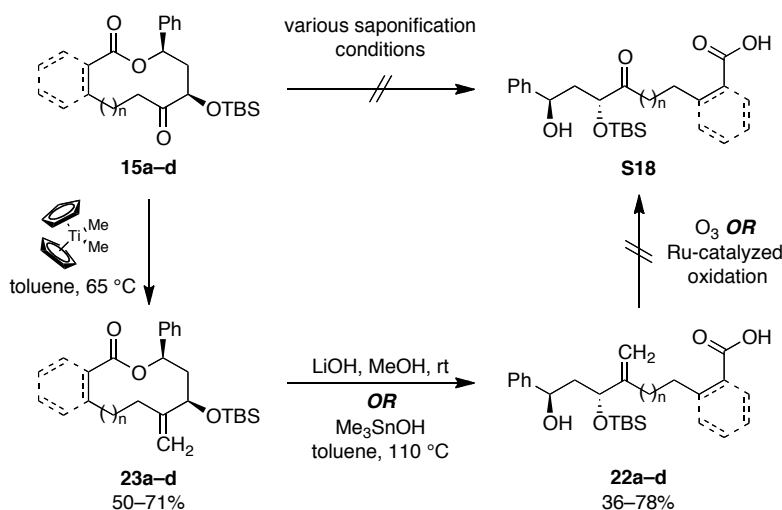

**Supplementary Figure 17. Synthesis of methylenated *seco*-acids 22a–d as substrates for macrocyclization.** The linear cyclization precursors **22a–d** were synthesized by methylenation of the macrocyclic ketone and subsequent saponification. Attempts to access the corresponding ketone **S18** remained unsuccessful.

#### a. General protocol for Petasis olefination of macrocyclic ketones 15a–d<sup>17</sup>

In a flame-dried, Ar-flushed vial (small scale) or sealed tube (large scale), equipped with a stir bar and a septum, macrocyclic ketone **15** was dissolved in a solution of dimethyl titanocene (Cp<sub>2</sub>TiMe<sub>2</sub>) in toluene prepared by Howell's protocol<sup>18</sup> (*ca.* 0.4–0.6 M; concentration determined by <sup>1</sup>H-NMR analysis; 2.5 equiv). The septum was replaced by a screw cap (vial) or Teflon stopper (sealed tube), respectively. **NOTE: The tube must be sealed tightly, as a loss in internal pressure may lead to a much lower conversion!** The tube was heated at 65 °C for at least 12 h.

<sup>17</sup> Petasis, N. A.; Bzowej, E. I. *J. Am. Chem. Soc.* **1990**, *112*, 6392.

<sup>18</sup> Blauvelt, M. L.; Howell, A. R. *J. Org. Chem.* **2008**, *73*, 517.



The progress of the reaction was monitored by TLC analysis of small reaction aliquots (removed from the reaction vessel under Ar stream after temporarily cooling to rt). After the reaction had reached sufficient conversion (traces of the starting material were visible, as well as the presumably doubly olefinated product at higher  $R_f$ ), the reaction solution was transferred into a roundbottom flask with rinsing with excess  $\text{CH}_2\text{Cl}_2$ , such that the final solution contains toluene and  $\text{CH}_2\text{Cl}_2$  in at least a 1:10 ratio. Flash grade silica gel was then added, leading to evolution of gas, and the solvents are subsequently removed by rotary evaporation. The resulting yellow-orange powder was dry-loaded directly onto column for purification by silica flash chromatography (hexanes/EtOAc) to afford methylenated macrocycle **23**.

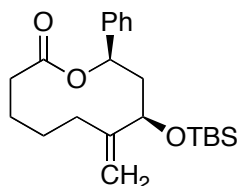

**cis-8-(tert-Butyldimethylsilyloxy)-7-methylene-10-phenyloxecan-2-one (23a).** Synthesized from macrocyclic ketone **15a** (204 mg, 0.542 mmol). Purification by silica flash chromatography (20:1 hexanes/EtOAc, 0.5 vol%  $\text{Et}_3\text{N}$ ) afforded **23a** as colorless solid (111 mg, 55%).

**TLC:**  $R_f$  0.47 (10:1 hexanes/EtOAc). **mp** = 55.7–58.4 °C. **IR** (NaCl, film): 2952 (s, C–H st), 2929 (s, C–H st), 2894 (m, C–H st), 2856 (s, C–H st), 1733 (C=O st), 1495 (w), 1471 (w), 1460 (w), 1361 (w), 1349 (w), 1251 (s, Si–Me  $\delta$  sy), 1212 (m), 1146 (w), 1089 (m, C–O/Si–O st), 1059 (vs, C–O/Si–O st), 1023 (m), 1006 (w), 946 (w), 896 (m), 880 (m), 835 (s, C–Si st), 777 (m), 698 (m).  **$^1\text{H-NMR}$**  (500 MHz):  $\delta$  7.37–7.32 (m, 4H), 7.29–7.27 (m, 1H), 5.75 (d, 1H,  $J$  = 10.8), 5.17 (s, 1H), 4.92 (s, 1H), 4.18 (dd, 1H,  $J$  = 10.2, 4.7), 2.51–2.43 (m, 2H), 2.35–2.28 (m, 1H), 2.24–2.17 (m, 1H), 2.11–1.95 (m, 4H), 1.70–1.63 (m, 2H), 0.84 (s, 9H), 0.02 (s, 3H), 0.00 (s, 3H).  **$^{13}\text{C-NMR}$**  (125 MHz,  $\text{C}_6\text{D}_6$ ):  $\delta$  171.7, 150.9, 141.1, 128.5, 128.3, 126.7, 109.4, 76.8, 72.5, 45.2, 35.5, 29.3, 25.7, 24.7, 22.4, 18.1, –4.8, –5.2. **ESI-MS**  $m/z$  (rel int): (pos) 397.2 ( $[\text{M}+\text{Na}]^+$ , 95), 375.2 ( $[\text{M}+\text{H}]^+$ , 90), 243.0 ( $[\text{M}-\text{TBSOH}+\text{H}]^+$ , 100).

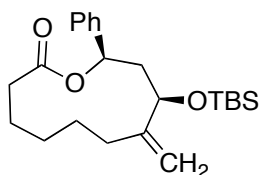

**cis-9-(tert-Butyldimethylsilyloxy)-8-methylene-11-phenyloxacycloundecan-2-one (23b).** Synthesized from macrocycle **15b** (80.0 mg, 0.205 mmol). Purification by silica flash chromatography (20:1 hexanes/EtOAc, 0.5 vol%  $\text{Et}_3\text{N}$ ) afforded **23b** as slightly yellow oil (43.2 mg, 55%).

**TLC:**  $R_f$  0.62 (10:1 hexanes/EtOAc). **IR** (NaCl, film): 2951 (s, C–H st), 2930 (s, C–H st), 2856 (m, C–H st), 1734 (vs, C=O st), 1648 (w, C=C st), 1461 (m), 1389 (w), 1361 (m), 1334 (m), 1252 (vs, Si–Me  $\delta$  sy), 1160 (m), 1148 (m), 1099 (m, C–O/Si–O st), 1070 (s, C–O/Si–O st), 1044

(s, C–O/Si–O st), 1014 (m), 969 (w), 903 (w), 872 (m), 836 (s, C–Si st), 776 (s, C–Si st), 698 (m). **<sup>1</sup>H-NMR** (500 MHz):  $\delta$  7.36–7.26 (m, 5H), 5.68 (dd, 1H,  $J = 10.6, 0.7$ ), 5.10 (s, 1H), 4.77 (s, 1H), 4.31 (dd, 1H,  $J = 8.4, 4.9$ ), 2.53–2.41 (m, 3H), 2.18–2.07 (m, 2H), 1.99–1.89 (m, 2H), 1.67–1.51 (m, 4H), 1.36–1.34 (m, 1H), 0.87 (s, 9H), 0.06 (s, 3H), 0.03 (s, 3H). **<sup>13</sup>C-NMR** (125 MHz):  $\delta$  172.6, 149.4, 141.7, 128.7, 128.0, 126.2, 110.9, 76.2, 73.8, 44.5, 36.3, 26.0, 25.8, 25.3, 23.9, 20.8, 18.3, –4.63, –4.80. **ESI-MS**  $m/z$  (rel int): (pos) 427.0 ( $[M+K]^+$ , 60), 411.1 ( $[M+Na]^+$ , 100); (neg) 387.1 ( $[M-H]^-$ , 100).

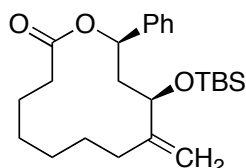

***cis*-10-(*tert*-Butyldimethylsilyloxy)-9-methylene-12-phenyloxacyclododecan-2-one (23c).** Synthesized from macrocycle **15c** (120 mg, 0.297 mmol). Purification by silica flash chromatography (20:1 hexanes/EtOAc, 0.5 vol% Et<sub>3</sub>N) afforded **23c** as colorless oil (60.4 mg, 50%).

**TLC:**  $R_f$  0.72 (10:1 hexanes/EtOAc). **IR** (NaCl, film): 2952 (s, C–H st), 2931 (s, C–H st), 2857 (m, C–H st), 1734 (vs, C=O st), 1654 (w), 1463 (m), 1389 (w), 1361 (m), 1333 (m), 1250 (s, Si–Me  $\delta$  sy), 1179 (m), 1154 (m), 1137 (m), 1102 (m, C–O/Si–O st), 1069 (s, C–O/Si–O st), 1055 (s, C–O/Si–O st), 1037 (m, C–O/Si–O st), 987 (m), 904 (m), 871 (m), 836 (s, C–Si st), 775 (s, C–Si st), 698 (m). **<sup>1</sup>H-NMR** (500 MHz):  $\delta$  7.35–7.26 (m, 7H), 5.82 (dd, 1H,  $J = 9.8, 1.5$ ), 5.11 (s, 1H), 4.83 (s, 1H), 4.22 (t, 1H,  $J = 5.9$ ), 2.41 (ddd, 1H,  $J = 15.3, 9.7, 6.0$ ), 2.36–2.26 (m, 3H), 2.05 (ddd, 1H,  $J = 14.9, 9.3, 6.0$ ), 1.90 (ddd, 1H,  $J = 15.2, 5.9, 1.5$ ), 1.83–1.35 (m, 9H), 0.90 (s, 9H), 0.09 (s, 3H), 0.02 (s, 3H). **<sup>13</sup>C-NMR** (125 MHz):  $\delta$  173.3, 150.2, 141.9, 128.7, 127.9, 126.1, 111.7, 74.3, 74.1, 45.7, 34.9, 29.9, 26.7, 26.0, 25.7, 25.0, 22.9, 18.3, –4.3, –4.8. **ESI-MS**  $m/z$  (rel int): (pos) 443.1 ( $[M+NH_4+Na]^+$ , 40), 425.1 ( $[M+Na]^+$ , 100); (neg) 401.1 ( $[M-H]^-$ , 60).

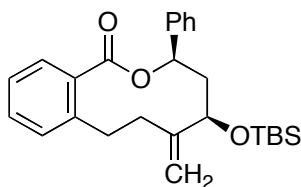

***cis*-5-(*tert*-Butyldimethylsilyloxy)-6-methylene-3-phenyl-3,4,5,6,7,8-hexahydro-1H-benzo-*c*]oxecin-1-one (23d).** Synthesized from macrocycle **15d** (100 mg, 0.236 mmol). Purification by silica flash chromatography (20:1 hexanes/EtOAc, 0.5 vol% Et<sub>3</sub>N) afforded **23d** as pale yellow solid (70.4 mg, 71%).

**TLC:**  $R_f$  0.70 (10:1 hexanes/EtOAc). **mp** = 99.6–100.1 °C. **IR** (NaCl, film): 2953 (m, C–H st), 2929 (m, C–H st), 2883 (w), 2856 (m, C–H st), 1714 (vs, C=O st), 1603 (w), 1471 (w), 1449 (w), 1331 (w), 1289 (m), 1265 vs, Si–Me  $\delta$  sy), 1252 (m, Si–Me  $\delta$  sy), 1126 (s, C–O/Si–O st), 1071 (s, C–O/Si–O st), 1053 (s, C–O/Si–O st), 1025 (m, C–O/Si–O st), 1004 (m), 958 (w), 936 (w), 881 (m), 816 (s, C–Si st), 777 (m), 754 (m), 703 (s). **<sup>1</sup>H-NMR** (500 MHz):  $\delta$  7.94 (dd, 1H,  $J = 7.6, 1.3$ ), 7.47–7.44 (m, 3H), 7.36 (t, 2H,  $J = 7.6$ ), 7.31–7.25 (m, 6H), 5.89 (d, 1H,  $J = 11.3$ ), 4.87 (s, 1H), 4.40 (dd, 1H,  $J = 10.9, 5.2$ ), 4.12 (s, 1H), 4.05 (td, 1H,  $J = 13.2, 4.1$ ), 2.96 (dt, 1H,  $J =$

13.2, 4.1), 2.77 (dt, 1H,  $J = 13.2, 4.4$ ), 2.61 (ddd, 1H,  $J = 14.4, 11.5, 10.9$ ), 2.12 (dd, 1H,  $J = 14.4, 5.2$ ), 1.99 (td, 1H,  $J = 13.2, 4.4$ ), 0.87 (s, 9H), 0.04 (s, 3H), -0.01 (s, 3H).  $^{13}\text{C-NMR}$  (125 MHz):  $\delta$  168.6, 147.3, 143.1, 140.5, 132.9, 132.2, 131.5, 130.7, 128.8, 128.2, 126.6, 126.6, 117.9, 77.9, 73.8, 43.7, 36.2, 30.7, 25.9, 18.3, -4.6, -4.9. **ESI-MS**  $m/z$  (rel int): (pos) 445.5 ( $[\text{M}+\text{Na}]^+$ , 100).

### ***b. General protocol for saponification of macrolactones 23a–d using LiOH in MeOH***

Macrocycle **23** was dissolved in MeOH (25 mL/mmol, 0.04 M solution) at rt. LiOH (35 equiv) was added neat in 5–6 portions over 5–10 min at rt. The reaction mixture was stirred at rt for 6–18 h. Progress of the reaction was monitored by TLC analysis (aliquots worked up with 1.0 M HCl/EtOAc). After the reaction was complete, the mixture was cooled to 0 °C and satd aq  $\text{NH}_4\text{Cl}$  was added, followed by 1.0 M HCl. The still-cool mixture was extracted with EtOAc (5 $\times$ ). The combined organic extracts were dried ( $\text{MgSO}_4$ ), filtered, and concentrated to *ca.* 1/5th of their original volume by rotary evaporation. An approximately equal volume of cyclohexane was added to remove azeotropically any trace AcOH contaminants from the EtOAc, and all solvents were removed by rotary evaporation. The crude residue was dried under high vacuum and immediately purified by silica flash chromatography to afford *seco*-acid **22**.

**NOTE:** *seco*-Acids **22** appear to be sensitive to overly acidic conditions, leading to decomposition and/or silyl migration. Avoid generating and/or storing concentrated solutions that may contain traces of AcOH (occasional contaminants from EtOAc) or other acids. For the same reason,  $\text{CH}_2\text{Cl}_2/\text{MeOH}$  eluent mixtures are recommended for silica flash chromatography instead of hexanes/EtOAc/AcOH mixtures, although the latter were used successfully in some cases.

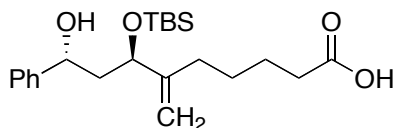

***trans*-7-(*tert*-Butyldimethylsilyloxy)-9-hydroxy-6-methylene-9-phenylnonanoic acid (**22a**).** Synthesized from macrocyclic olefin **23a** (74.8 mg, 0.200 mmol). Purification by silica flash chromatography (19:1  $\text{CH}_2\text{Cl}_2/\text{MeOH}$ ) afforded **22a** as colorless solid (48.9 mg, 62%).

**TLC:**  $R_f$  0.37 (19:1  $\text{CH}_2\text{Cl}_2/\text{MeOH}$ ). **mp** = 75.1–79.1 °C. **IR** (NaCl, film) 3406 (br, O–H st), 3137 (br, O–H st), 3085 (w), 3064 (w), 3030 (w), 2952 (s, C–H st), 2929 (m, C–H st), 2894 (m, C–H st), 2857 (m, C–H st), 1710 (vs, C=O st), 1462 (w), 1410 (w), 1390 (w), 1361 (w), 1253 (s, Si–Me  $\delta$  sy), 1195 (w), 1092 (m, C–OH/C–O/Si–O st), 1059 (s, C–OH/C–O/Si–O st), 981 (w), 901 (m), 835 (vs, C–Si st), 777 (m), 699 (m).  $^1\text{H-NMR}$  (500 MHz):  $\delta$  7.35–7.31 (m, 4H), 7.27–7.23 (m, 1H), 5.21 (s, 1H), 4.97 (s, 1H), 4.89 (dd, 1H,  $J = 10.0, 2.2$ ), 4.42 (t, 1H,  $J = 4.4$ ), 2.39 (t, 2H,  $J = 7.4$ ), 2.13–2.06 (m, 1H), 2.02–1.91 (m, 2H), 1.86 (ddd, 1H,  $J = 14.5, 5.6, 2.2$ ), 1.72–1.65 (m, 2H), 1.60–1.51 (m, 2H), 0.11 (s, 3H), 0.06 (s, 3H).  $^{13}\text{C-NMR}$  (125 MHz):  $\delta$  177.4, 149.7, 145.0, 128.5, 127.3, 125.8, 110.6, 74.2, 71.1, 44.6, 33.6, 31.7, 27.4, 26.0, 24.7, 18.4, -4.6, -5.2. **ESI-MS**  $m/z$  (rel int): (pos) 415.0 ( $[\text{M}+\text{Na}]^+$ , 100); (neg) 783.4 ( $[\text{2M}-\text{H}]^-$ , 61), 391.1 ( $[\text{M}-\text{H}]^-$ , 100).

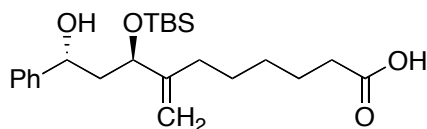

**trans-8-(tert-Butyldimethylsilyloxy)-10-hydroxy-7-methylene-10-phenyldecanoic acid (22b).** Synthesized from macrocyclic olefin **23b** (35.0 mg, 0.0901 mmol). Purification by silica flash chromatography (1:1 hexanes/EtOAc, 1.0 vol% AcOH) afforded **22b** as colorless oil (28.0 mg, 78%).

**TLC:**  $R_f$  0.36 (19:1 CH<sub>2</sub>Cl<sub>2</sub>/MeOH). **IR** (NaCl, film): 3400 (br, O–H st), 3159 (br, O–H st), 385 (w), 3064 (w), 3029 (w), 2951 (s, C–H st), 2929 (vs, C–H st), 2857 (s, C–H st), 1710 (vs, C=O st), 1648 (w), 1462 (m), 1410 (m), 1361 (w), 1253 (s, Si–Me  $\delta$  sy), 1194 (m), 1093 (s, C–OH/C–O/Si–O st), 1059 (s, C–OH/C–O/Si–O st), 1005 (w), 982 (m), 939 (w), 900 (m), 835 (s, C–Si st), 778 (m, C–Si st), 757 (m), 699 (s). **<sup>1</sup>H-NMR** (500 MHz):  $\delta$  7.35–7.31 (m, 4H), 7.25–7.22 (m, 1H), 5.21 (s, 1H), 4.96 (s, 1H), 4.90 (dd, 1H,  $J = 9.9, 2.1$ ), 4.42 (t, 1H,  $J = 4.4$ ), 2.36 (t, 2H,  $J = 7.5$ ), 2.10–2.04 (m, 1H), 1.98–1.91 (m, 2H), 1.85 (ddd, 1H,  $J = 14.5, 5.6, 2.1$ ), 1.66 (quintet, 2H,  $J = 7.5$ ), 1.56–1.44 (m, 2H), 1.43–1.35 (m, 2H), 1.26 (s, 1H), 0.95 (s, 9H), 0.11 (s, 3H), 0.06 (s, 3H). **<sup>13</sup>C-NMR** (125 MHz): 179.4, 149.9, 144.9, 128.5, 127.3, 125.8, 110.4, 74.2, 71.1, 44.4, 34.1, 32.0, 29.1, 27.7, 26.0, 24.7, 18.3, –4.6, –5.2. **ESI-MS**  $m/z$  (rel int): (pos) 429.4 ([M+Na]<sup>+</sup>, 100); (neg) 405.3 ([M–H]<sup>–</sup>, 100).

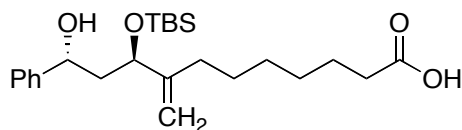

**trans-9-(tert-Butyldimethylsilyloxy)-11-hydroxy-8-methylene-11-phenylundecanoic acid (22c).** Synthesized from macrocyclic olefin **23c** (32.1 mg, 0.0798 mmol). Purification by silica flash chromatography (19:1 CH<sub>2</sub>Cl<sub>2</sub>/MeOH) afforded **22c** as colorless oil (12.0 mg, 36%).

**TLC:**  $R_f$  0.31 (19:1 CH<sub>2</sub>Cl<sub>2</sub>/MeOH). **IR** (NaCl, film): 3398 (br, O–H st), 3169 (br, O–H st), 3085 (w), 3064 (w), 3030 (w), 2949 (s, C–H st), 2929 (vs, C–H st), 2856 (s, C–H st), 1710 (s, C=O st), 1462 (w), 1409 (w), 1390 (w), 1361 (w), 1252 (m, Si–Me  $\delta$  sy), 1219 (w), 1082 (m, C–OH/C–O/Si–O st), 1060 (m, C–OH/C–O/Si–O st), 983 (w), 901 (w), 835 (s, C–Si st), 776 (s, C–Si st). **<sup>1</sup>H-NMR** (500 MHz):  $\delta$  7.36–7.31 (m, 4H), 7.26–7.22 (m, 1H), 5.20 (s, 1H), 4.96 (s, 1H), 4.90 (dd, 1H,  $J = 10.0, 2.2$ ), 4.42 (t, 1H,  $J = 4.2$ ), 2.35 (t, 2H,  $J = 7.3$ ), 2.06 (ddd, 1H,  $J = 15.6, 9.2, 6.6$ ), 1.94 (m, 2H,  $J = 4.0$ ), 1.85 (ddd, 1H,  $J = 14.5, 5.4, 2.2$ ), 1.65 (quintet, 2H,  $J = 7.3$ ), 1.54–1.43 (m, 2H), 1.37–1.31 (m, 4H), 0.95 (s, 9H), 0.11 (s, 3H), 0.06 (s, 3H). **<sup>13</sup>C-NMR** (125 MHz):  $\delta$  177.8, 150.0, 145.0, 128.5, 127.3, 125.8, 110.3, 74.3, 71.1, 44.4, 33.8, 32.1, 29.3, 29.0, 27.8, 26.0, 24.8, 18.4, –4.6, –5.2. **ESI-MS**  $m/z$  (rel int): (pos) 443.0 ([M+Na]<sup>+</sup>, 100); (neg) 419.1 ([M–H]<sup>–</sup>, 100).

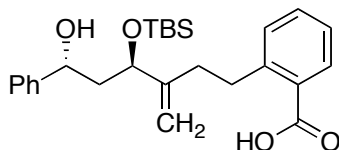

**2-(*trans*-4-(*tert*-Butyldimethylsilyloxy)-6-hydroxy-3-methylene-6-phenylhexyl)benzoic acid (22d).** In a flame-dried, Ar-flushed 4 mL vial equipped with a stir bar and a septum cap, macrocyclic olefin **23d** (20.8 mg, 0.0492 mmol) was dissolved in toluene (0.20 mL; 0.25 M solution) at rt. Trimethyltin hydroxide (178.0 mg, 0.980 mmol, 20.0 equiv) was added neat, and the tube was sealed with a screw cap and heated to 110 °C for 12 h. The reaction was monitored by TLC analysis (aliquots worked up with 1.0 M HCl/EtOAc). After the reaction was complete, the mixture was cooled to 0 °C and satd aq NH<sub>4</sub>Cl was added, followed by 1.0 M HCl. The still-cool mixture was extracted with EtOAc (5×), and the combined organic extracts were dried (MgSO<sub>4</sub>), filtered, and concentrated to *ca.* 1/5 of their volume by rotary evaporation. An approximately equal volume cyclohexane was added and all solvents were removed by rotary evaporation. Purification by silica flash chromatography (40:1 CH<sub>2</sub>Cl<sub>2</sub>/MeOH) afforded **22d** as colorless oil (13.2 mg, 60%).

**TLC:** *R<sub>f</sub>* 0.28 (19:1 CH<sub>2</sub>Cl<sub>2</sub>/MeOH). **IR** (NaCl, film): 3408 (br, O–H st), 3144 (br, O–H st), 3064 (w), 3028 (w), 2954 (s, C–H st), 2929 (s, C–H st), 2892 (m, C–H st), 2857 (m, C–H st), 2647 (w), 1693 (vs, C=O st), 1650 (w), 1602 (w), 1576 (w), 1491 (w), 1454 (w), 1405 (w), 1389 (w), 1299 (m), 1256 (s, Si–Me δ sy), 1135 (w), 1086 (s, C–OH/C–O/Si–O st), 1061 (s, C–OH/C–O/Si–O st), 972 (w), 901 (m), 835 (vs, C–Si st), 777 (m, C–Si st), 750 (m), 700 (m). **<sup>1</sup>H-NMR** (500 MHz): δ 7.99 (d 1H, *J* = 7.5.), 7.48 (td, 1H, *J* = 7.5, 0.9), 7.34 (m, 2H), 7.31–7.27 (m, 4H), 7.20 (t, 1H, *J* = 7.5), 5.28 (s, 1H), 5.08 (s, 1H), 4.95 (dd, 1H, *J* = 10.3, 1.8), 4.58–4.56 (m, 1H), 3.32 (td, 1H, *J* = 12.1, 4.3), 3.02 (td, 1H, *J* = 12.1, 5.4), 2.38 (td, 1H, *J* = 13.2, 5.4), 2.27 (td, 1H, *J* = 13.2, 4.3), 2.01 (ddd, 1H, *J* = 14.5, 10.3, 3.7), 1.88 (ddd, 1H, *J* = 14.5, 6.1, 1.8), 1.26 (s, 1H), 0.97 (s, 9H), 0.14 (s, 3H), 0.09 (s, 3H). **<sup>13</sup>C-NMR** (125 MHz): δ 171.7, 150.1, 145.1, 144.9, 133.1, 132.0, 131.3, 128.4, 128.2, 127.3, 126.4, 125.8, 110.7, 73.4, 71.3, 44.9, 34.9, 34.1, 26.0, 18.4, –4.5, –5.1. **ESI-MS** *m/z* (rel int): (pos) 903.9 ([2M+Na]<sup>+</sup>, 25), 463.4 ([M+Na]<sup>+</sup>, 100); (neg) 879.8 ([2M–H]<sup>–</sup>, 12), 439.5 ([M–H]<sup>–</sup>, 100).

2. SYNTHESIS OF LINEAR *N*-NOSYL AMINO ACID (**S22**)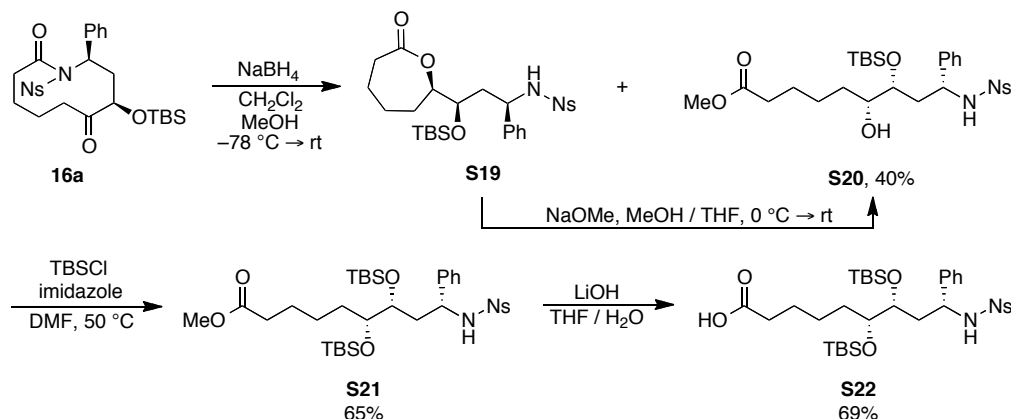

**Supplementary Figure 18. Synthesis of *N*-nosyl amino acid **S22**.** Exposure of *N*-nosyl-protected macrolactam **16a** to  $\text{NaBH}_4$  in  $\text{CH}_2\text{Cl}_2/\text{MeOH}$  resulted in a mixture of products, including lactone **S19** and methyl ester **S20**. Presumably, reduction of the ketone of **16a** is followed by a transannular lactonization event to yield lactone **S19**, which then undergoes methanolysis to afford methyl ester **S20**. Treatment of the crude mixture with  $\text{NaOMe}$  in  $\text{MeOH}/\text{THF}$  converts lactone **S19** to methyl ester **S20**, which is then TBS protected to give **S21**. Exposure of methyl ester **S21** to  $\text{LiOH}$  then affords *N*-nosyl-protected amino acid **S22**, which is then used as the precursor for macrocyclization.

The attempted direct hydrolysis of macrolactam **16a** using reagents such as  $\text{LiOH}$  and  $\text{NaOH}$  led to complex mixtures. We suspected the sensitive ketone functionality of **16a** played a role in complicating the saponification reaction and, thus, we attempted an analogous ketone methylation approach as was used in the macrolactone series above. Unfortunately, repeated attempts at methylation (*e.g.*, Petasis, Tebbe, Wittig) of the ketone of **16a** resulted only in decomposition of the starting material. This may result from side reactions of the activated carbonyl in the *N*-nosylamide moiety.

Interestingly, treatment of macrolactam **16a** with  $\text{NaBH}_4$  in  $\text{CH}_2\text{Cl}_2/\text{MeOH}$  resulted in a mixture of products, including caprolactone **S19** and methyl ester **S20** (**Supplementary Fig. 18**). Presumably, macrolactam **16a** undergoes  $\text{NaBH}_4$  reduction followed by transesterification to yield lactone **S19**, which can then undergo methanolysis to afford methyl ester **S20**. Notably, lactone **S19** was converted to methyl ester **S20** by treatment of the crude mixture with  $\text{NaOMe}/\text{MeOH}$  in  $\text{THF}$ . Methyl ester **S20** was then converted to the *N*-nosyl amino acid **S22** as a substrate for macrocyclization experiments in SECTION H below.

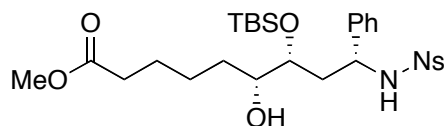

**(6*R*\*,7*R*\*,9*R*\*)-Methyl-7-(*tert*-butyldimethylsilyloxy)-6-hydroxy-9-(2-nitrophenylsulfonamido)-9-phenylnonanoate (**S20**).** In a flame-dried, Ar-flushed 4 mL vial equipped with stir bar and septum cap, macrolactam **16a** (40 mg, 0.071 mmol) was dissolved in  $\text{CH}_2\text{Cl}_2$  (0.30 mL) and  $\text{MeOH}$  (0.30 mL). The solution was cooled to  $-78^\circ\text{C}$  and  $\text{NaBH}_4$  (3.0 mg, 0.079 mmol, 1.1 equiv) was added as a solid. The reaction was allowed to warm to rt and stirred for 12 h, after which the majority of macrolactam **16a** had been consumed and several new spots were observed

by TLC analysis. The reaction was quenched with satd aq  $\text{NH}_4\text{Cl}$  and extracted with  $\text{CH}_2\text{Cl}_2$  (3 $\times$ ). The combined organic extracts were washed with brine, dried ( $\text{MgSO}_4$ ), filtered, and concentrated by rotary evaporation to afford a mixture of lactone **S19** and methyl ester **S20**. The crude product was dissolved in THF (1 mL) and cooled to 0 °C. NaOMe (0.5 M in MeOH, 1 mL, 0.5 mmol, 7 equiv) was added and the reaction was warmed to rt and stirred for 12 h. Satd aq  $\text{NH}_4\text{Cl}$  was added at rt, and the mixture was extracted with  $\text{CH}_2\text{Cl}_2$  (3 $\times$ ). The combined organic extracts were washed with brine, dried ( $\text{MgSO}_4$ ), filtered, and concentrated by rotary evaporation. Purification by preparative TLC (4:1 hexanes/EtOAc) afforded **S20** as a clear oil (16.9 mg, 40%).

**TLC:**  $R_f$  0.23 (2:1 Hexanes/EtOAc). **IR** (NaCl, film): 3433 (br, s, O–H), 3091 (w), 3078 (w), 3029 (w), 2952 (s, C–H st), 2930 (s, C–H st), 2899 (m, C–H st), 2857 (m), 1735 (s, C=O st), 1595 (w), 1541 (vs, N=O st), 1459 (w), 1440 (w), 1413 (w), 1361 (m), 1257 (m, Si–Me), 1168 (vs, S=O st), 1125 (w), 1092 (m), 1075 (m), 836 (m), 778 (m), 741 (m), 730 (m), 701 (m).  **$^1\text{H-NMR}$**  (500 MHz):  $\delta$  7.66 (dd, 1H,  $J = 7.9, 1.1$ ), 7.51–7.45 (m, 2H), 7.29 (td, 1H,  $J = 7.7, 1.1$ ), 7.03 (tt, 5H,  $J = 6.0, 3.0$ ), 6.02 (d, 1H,  $J = 8.5$ ), 4.65 (td, 1H,  $J = 8.5, 5.4$ ), 3.73–3.70 (m, 1H), 3.66 (s, 3H), 3.54–3.50 (m, 1H), 2.31 (t, 2H,  $J = 7.5$ ), 2.20 (ddd, 1H,  $J = 14.4, 9.5, 4.9$ ), 1.96 (d, 1H,  $J = 7.0$ ), 1.81–1.76 (m, 1H), 1.68–1.57 (m, 2H), 1.52–1.27 (m, 4H), 0.93 (s, 9H), 0.16 (s, 3H), 0.05 (s, 3H).  **$^{13}\text{C-NMR}$**  (125 MHz):  $\delta$  174.1, 147.2, 140.2, 134.6, 132.7, 132.3, 130.8, 128.5, 127.8, 126.5, 124.7, 73.1, 72.0, 56.6, 51.5, 41.4, 34.0, 32.6, 26.0, 25.6, 24.9, 18.2, –4.3, –4.4. **ESI-MS**  $m/z$  (rel int): (pos) 617 ( $[\text{M}+\text{H}]^+$ , 100); (neg) 593 ( $[\text{M}-\text{H}]^-$ , 100).

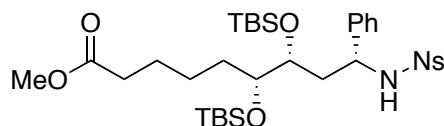

**(6R\*,7R\*,9R\*)-Methyl-6,7-bis(*tert*-butyldimethylsilyloxy)-9-(2-nitrophenylsulfonamido)-9-phenylnonanoate (S21).** In a flame-dried, Ar-flushed 4 mL vial equipped with stir bar and septum cap, alcohol **S20** (16.0 mg, 0.0269 mmol) was dissolved in DMF (0.25 mL). To this solution was added imidazole (9.5 mg, 0.14 mmol, 5.0 equiv), then TBSCl (8.1 mg, 0.054 mmol, 2.0 equiv), and the reaction mixture was stirred for 12 h at 50 °C. The reaction was cooled to rt, quenched with satd aq  $\text{NaHCO}_3$ , and extracted with EtOAc (3 $\times$ ). The combined organic extracts were washed with water and brine, dried ( $\text{MgSO}_4$ ), filtered, and concentrated by rotary evaporation. Purification by silica flash chromatography (6:1 hexanes/EtOAc) afforded **S21** as a clear oil (12.4 mg, 65%).

**TLC:**  $R_f$  0.60 (2:1 Hexanes/EtOAc). **IR** (NaCl, film): 3360 (m, N–H), 2952 (s, C–H st), 2930 (s, C–H st), 2893 (m, C–H st), 2857 (s, C–H st), 1739 (s, C=O st), 1542 (vs, N=O st), 1495 (w), 1471 (m), 1460 (m), 1441 (m), 1411 (s), 1361 (s), 1258 (s, Si–Me), 1171 (vs, S=O st), 1096 (s, Si–O), 1075 (m), 939 (w), 920 (w), 835 (vs), 806 (m), 777 (vs), 741 (m), 731 (m), 700 (s).  **$^1\text{H-NMR}$**  (500 MHz):  $\delta$  7.64 (dd, 1H,  $J = 8.3, 0.9$ ), 7.43 (t, 2H,  $J = 7.5$ ), 7.21 (td, 1H,  $J = 7.5, 0.9$ ), 7.03–6.95 (m, 5H), 5.73 (d, 1H,  $J = 9.6$ ), 4.69 (ddd, 1H,  $J = 11.8, 9.6, 2.3$ ), 4.03 (dd, 1H,  $J = 9.9, 4.8$ ), 3.63–3.61 (m, 4H), 2.27 (t, 2H,  $J = 7.5$ ), 2.10 (dd, 1H,  $J = 14.0, 11.8$ ), 1.65–1.55 (m, 4H), 1.54–1.44 (m, 1H), 1.17–1.12 (m, 2H), 0.97 (d, 18H,  $J = 4.4$ ), 0.31 (s, 3H), 0.17 (s, 3H), 0.15 (s, 3H), 0.08 (s, 3H).  **$^{13}\text{C-NMR}$**  (125 MHz):  $\delta$  174.1, 147.2, 140.7, 134.8, 132.4, 132.2, 130.6, 128.3, 127.5, 126.3, 124.6, 74.3, 71.2, 56.6, 51.5, 39.1, 34.0, 29.5, 26.2, 26.0, 25.9,

25.2, 18.1, 18.1, -3.9, -3.9, -4.5, -4.6. **ESI-MS**  $m/z$  (rel int): (pos) 717.5 ( $[M+Na]^+$ , 100), 319 ( $[M+Na]^+$ , 20); (neg) 295 ( $[M-H]^-$ , 100).

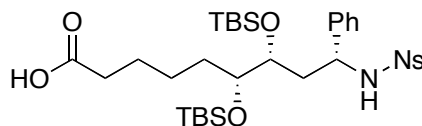

**(6R\*,7R\*,9R\*)-6,7-Bis(tert-butyldimethylsilyloxy)-9-(2-nitrophenylsulfonamido)-9-phenylnonanoic acid (S22)**. In a 4 mL vial equipped with a stir bar, methyl ester **S21** (5.9 mg, 0.0083 mmol) was dissolved in THF (0.75 mL) and water (0.75 mL). LiOH (1.0 mg, 0.042 mmol, 5.0 equiv) was added and the reaction mixture was stirred at rt for 4.5 h. Satd aq  $NH_4Cl$  was added and the mixture was stirred for an additional 10 min. The reaction was extracted with EtOAc (3 $\times$ ) and the combined organic extracts were washed with brine, dried ( $MgSO_4$ ), filtered, and concentrated by rotary evaporation. Purification by silica flash chromatography (3:1 hexanes/EtOAc) afforded **S22** as a colorless film (4.0 mg, 69%).

**TLC**:  $R_f$  0.32 (2:1 Hexanes/EtOAc). **IR** (NaCl, film): 3359 (N-H), 2952 (s, C-H st), 2929 (s, C-H st), 2896 (m), 2856 (m), 1710 (s, C=O st), 1541 (s, N=O st), 1459 (w), 1411 (m), 1360 (m), 1258 (m, Si-Me), 1170 (s, S=O st), 1094 (s, Si-O), 913 (s), 834 (s), 805 (w), 777 (s), 743 (vs), 700 (w), 656 (w), 629 (w).  **$^1H$ -NMR** (500 MHz):  $\delta$  7.64 (dd, 1H,  $J = 8.3, 1.2$ ), 7.44–7.41 (m, 2H), 7.23–7.20 (m, 1H), 6.99–6.96 (m, 5H), 5.74 (d, 1H,  $J = 9.7$ ), 4.69 (ddd, 1H,  $J = 11.7, 9.7, 2.2$ ), 4.03 (dd, 1H,  $J = 9.4, 4.5$ ), 3.63 (ddd, 1H,  $J = 9.7, 4.5, 2.0$ ), 2.32 (t, 2H,  $J = 7.4$ ), 2.10 (dd, 1H,  $J = 13.9, 11.7$ ), 1.65–1.45 (m, 5H), 1.35–1.20 (d, 2H,  $J = 0.7$ ), 0.97 (d, 18H,  $J = 3.7$ ), 0.31 (s, 3H), 0.17 (s, 3H), 0.15 (s, 3H), 0.08 (s, 3H).  **$^{13}C$ -NMR** (125 MHz):  $\delta$  175.6, 147.2, 140.7, 134.8, 132.4, 132.2, 130.6, 128.3, 127.5, 126.3, 124.6, 74.3, 71.2, 56.6, 39.1, 29.7, 29.5, 26.2, 26.0, 25.9, 24.9, 18.1, 1.1, -3.8, -3.9, -4.5, -4.7. **ESI-MS**  $m/z$  (rel int): (pos) 717.5 ( $[M+Na]^+$ , 100), 733.4 ( $[M+K]^+$ , 10); (neg) 693.4 ( $[M-H]^-$ , 100).

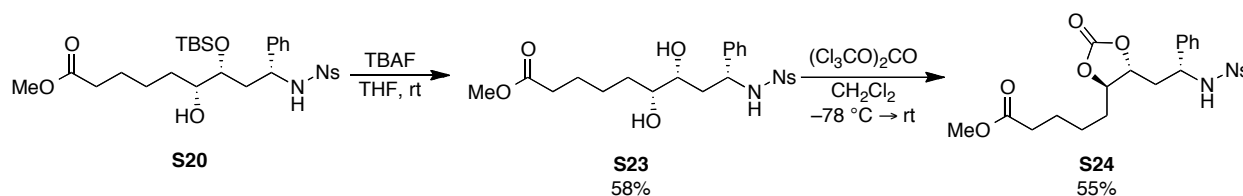

**Supplementary Figure 19. Assignment of relative stereochemistry of diol S20.** The relative stereochemistry of diol **S20**, generated via  $NaBH_4$  reduction of macrolactam **16a**, was determined via NOESY experiments on corresponding cyclic carbonate derivative (**S24**).

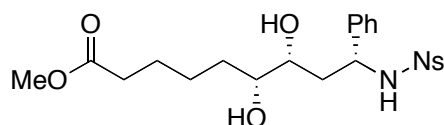

**(6R\*,7R\*,9R\*)-Methyl-6,7-dihydroxy-9-(2-nitrophenylsulfonamido)-9-phenylnonanoate (S23)**. In a 4 mL vial equipped with stir bar and septum, TBS-protected alcohol **S20** (4.9 mg, 0.0082 mmol) was dissolved in THF (1.0 mL) and the mixture was cooled to 0 °C. TBAF (0.1 M in THF, 0.25 mL, 0.025 mmol, 3.0 equiv) was added and the reaction mixture was



allowed to warm to rt and stirred for 6 h. Satd aq  $\text{NaHCO}_3$  was added and the mixture was stirred for an additional 10 min, then extracted with EtOAc (3 $\times$ ). The combined organic extracts were washed with brine, dried ( $\text{MgSO}_4$ ), filtered, and concentrated by rotary evaporation. Purification by silica flash chromatography (1:1 hexanes/EtOAc) afforded **S23** as a colorless film (2.3 mg, 58%).

**TLC:**  $R_f$  0.15 (1:1 Hexanes/EtOAc). **IR** (NaCl, film): 3511 (s, br, O–H st), 3332 (s, br), 3098 (w), 3067 (w), 3029 (w), 3003 (w), 2945 (s, C–H st), 2864 (m, C–H st), 1724 (s, C=O st), 1593 (w), 1540 (vs, N=O st), 1495 (w), 1455 (m), 1440 (m), 1416 (m), 1361 (s, N=O st), 1166 (vs, S=O st), 1062 (m), 914 (w), 854 (w), 783 (w), 733 (m), 703 (m).  **$^1\text{H-NMR}$**  (500 MHz):  $\delta$  7.74 (dd, 1H,  $J = 7.9, 1.4$ ), 7.71 (dd, 1H,  $J = 7.9, 1.2$ ), 7.54 (td, 1H,  $J = 7.7, 1.4$ ), 7.43 (td, 1H,  $J = 7.7, 1.3$ ), 7.06 (dd, 5H,  $J = 3.7, 1.4$ ), 6.57 (d, 1H,  $J = 9.1$ ), 4.86 (td, 1H,  $J = 9.1, 3.5$ ), 3.73–3.69 (m, 1H), 3.67 (s, 3H), 3.45–3.41 (m, 1H), 2.74 (d,  $J = 4.9$ , 1H), 2.32 (td, 2H,  $J = 7.3, 1.4$ ), 2.07 (d, 1H,  $J = 5.5$ ), 2.00–1.95 (m, 1H), 1.90–1.85 (m, 1H), 1.67–1.59 (m, 2H), 1.49–1.33 (m, 4H).  **$^{13}\text{C-NMR}$**  (125 MHz):  $\delta$  174.2, 147.3, 139.7, 134.6, 133.0, 132.5, 130.8, 128.4, 127.6, 126.4, 124.9, 74.2, 70.8, 56.7, 51.6, 40.3, 33.9, 32.9, 24.9, 24.7. **ESI-MS**  $m/z$  (rel int): (pos) 502.9 ( $[\text{M}+\text{Na}]^+$ , 100); (neg) 479.1 ( $[\text{M}-\text{H}]^-$ , 100).

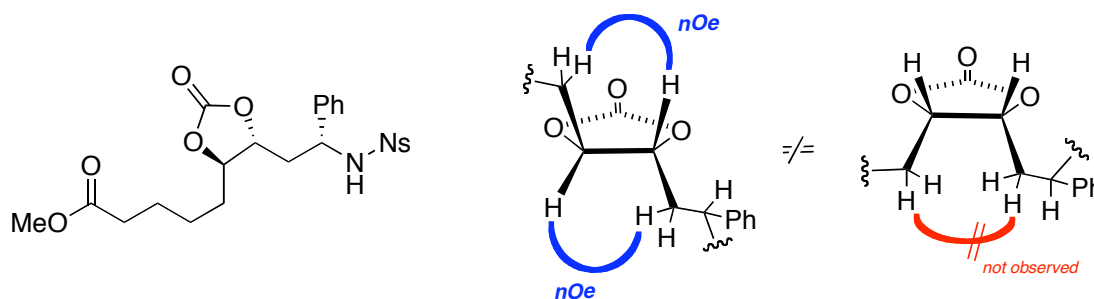

**Methyl 5-((4R\*,5R\*)-5-((R\*)-2-(2-nitrophenylsulfonamido)-2-phenylethyl)-2-oxo-1,3-dioxolan-4-yl)pentanoate (S24).** In a flame-dried, Ar-flushed 4 mL vial equipped with a stir bar and septum, diol **S23** (11.3 mg, 0.024 mmol) was dissolved in  $\text{CH}_2\text{Cl}_2$  (2.00 mL) and cooled to  $-78^\circ\text{C}$ . Pyridine (11  $\mu\text{L}$ , 0.14 mmol, 6.0 equiv) and triphosgene (3.5 mg, 0.012 mmol, 0.5 equiv) were added, and the mixture was allowed to warm to rt and stirred for 4 h. Satd aq  $\text{NH}_4\text{Cl}$  was added and the mixture was extracted with  $\text{CH}_2\text{Cl}_2$  (3 $\times$ ). The combined organic extracts were washed with brine, dried ( $\text{MgSO}_4$ ), filtered, and concentrated by rotary evaporation. Purification by silica flash chromatography (3:1 hexanes/EtOAc) afforded **S24** as a colorless film (4.1 mg, 55%).

**TLC:**  $R_f$  0.38 (1:1 Hexanes/EtOAc). **IR** (NaCl, film): 3097 (w), 3071 (w), 3028 (w), 2956 (m, C–H st), 2931 (m, C–H st), 2871 (w), 1797 (vs, C=O st), 1730 (vs, C=O st), 1541 (vs, N=O st), 1458 (m), 1441 (m), 1418 (m), 1364 (s, N=O st), 1287 (m), 1169 (vs), 1126 (m), 1061 (s), 912 (w), 854 (w), 776 (w), 731 (w), 702 (w).  **$^1\text{H-NMR}$**  (600 MHz):  $\delta$  7.82 (dd, 1H,  $J = 7.9, 1.3$ ), 7.68 (dd, 1H,  $J = 7.9, 1.1$ ), 7.55 (td, 1H,  $J = 7.7, 1.3$ ), 7.49 (td, 1H,  $J = 7.7, 1.2$ ), 7.08–7.05 (m, 5H), 6.11 (d, 1H,  $J = 10.1$ ), 4.77 (td, 1H,  $J = 10.1, 2.9$ ), 4.65 (ddd, 1H,  $J = 9.8, 6.7, 2.7$ ), 4.29 (q, 1H,  $J = 6.7$ ), 3.73 (s, 3H), 2.43–2.34 (m, 2H), 2.26 (ddd, 1H,  $J = 14.5, 11.3, 2.9$ ), 2.10 (ddd, 1H,  $J = 14.5, 10.5, 3.6$ ), 1.88–1.82 (m, 1H), 1.78–1.64 (m, 3H), 1.50–1.42 (m, 1H), 1.33–1.27 (m, 1H).  **$^{13}\text{C-NMR}$**  (125 MHz):  $\delta$  173.9, 154.9, 147.2, 138.7, 134.1, 133.3, 132.7, 131.1, 128.8,

128.3, 126.0, 125.0, 81.3, 78.1, 55.9, 51.8, 42.0, 33.5, 33.1, 24.0, 23.9. **ESI-MS** *m/z* (rel int): (pos) 503 ( $[M+Na]^+$ , 100); (neg) 479 ( $[M-H]^-$ , 100).

---

## H. MACROCYCLIZATION EXPERIMENTS WITH RELATED *SECO*-ACIDS

To evaluate the efficiency of our ring expansion approach compared to classical macrocyclizations, we investigated macrolactonization and macrolactamization reactions of the related *seco*-acids and amino acids. The *seco*-acid (**22a–d**) and amino acid (**S22**) substrates were accessed from the macrocyclic ring expansion products **15a–d** and **16a**, as described in SECTION G above.

### 1. MACROLACTONIZATION OF *SECO*-ACIDS (**22a–d**) WITH THE SHIINA MNBA REAGENT<sup>19</sup>

Macrolactonization according to the Shiina protocol was used in attempts to cyclize *seco*-acids **22**. As a positive control, one example from the original publication was reproduced successfully.<sup>19a</sup>

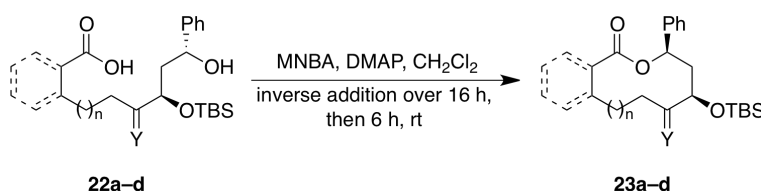

**Supplementary Figure 20. MNBA-mediated macrolactonizations of *seco*-acids **24**.** The *seco*-acids **22a–d** were subjected to Shiina macrolactonization conditions using MNBA and DMAP. The reactions were monitored by <sup>1</sup>H-NMR versus an internal standard (see **Supplementary Fig. 21** below). (MNBA = 6-methyl-2-nitrobenzoic anhydride; DMAP = 4-dimethylaminopyridine.)

#### General protocol for <sup>1</sup>H-NMR monitored macrolactonizations of *seco*-acids **24**

In a roundbottom flask (fitted with a Teflon tubing Ar inlet to avoid leeching of plasticizers that interfere with <sup>1</sup>H-NMR analysis into the sample), *seco*-acid **22** and 1,3,5-trimethoxybenzene (1.00 equiv, <sup>1</sup>H-NMR internal standard) were dissolved in CDCl<sub>3</sub> and a t = 0 <sup>1</sup>H-NMR spectrum was recorded to account for any inaccuracies in weighing small quantities. The CDCl<sub>3</sub> was carefully removed by rotary evaporation (≥200 mTorr, 25 °C), and the residue was redissolved in CH<sub>2</sub>Cl<sub>2</sub> (400 mL/mmol substrate, 2.50 mM), then added via syringe pump over 16 h to a solution of MNBA (6-methyl-2-nitrobenzoic anhydride; 1.20 equiv) and DMAP (dimethylaminopyridine; 2.40 equiv) in CH<sub>2</sub>Cl<sub>2</sub> (497 mL/mmol MNBA) with vigorous stirring at rt. The resulting mixture was stirred at rt for an additional 6 h. Satd aq NH<sub>4</sub>Cl was added and the mixture was stirred vigorously for at least 15 min. The layers were separated and the aqueous layer was extracted with CH<sub>2</sub>Cl<sub>2</sub> (3×). The combined organic extracts were dried (MgSO<sub>4</sub>), filtered, and carefully concentrated by rotary evaporation (≥ 200 mTorr, 25 °C). The residue was immediately redissolved in CDCl<sub>3</sub> and analyzed by <sup>1</sup>H-NMR.

<sup>19</sup> (a) Shiina, I.; Kubota, M.; Ibuka, R. *Tetrahedron Lett.* **2002**, *43*, 7535; (b) Shiina, I.; Kubota, M.; Oshiumi, H.; Hashizume, M. *J. Org. Chem.* **2004**, *69*, 1822.

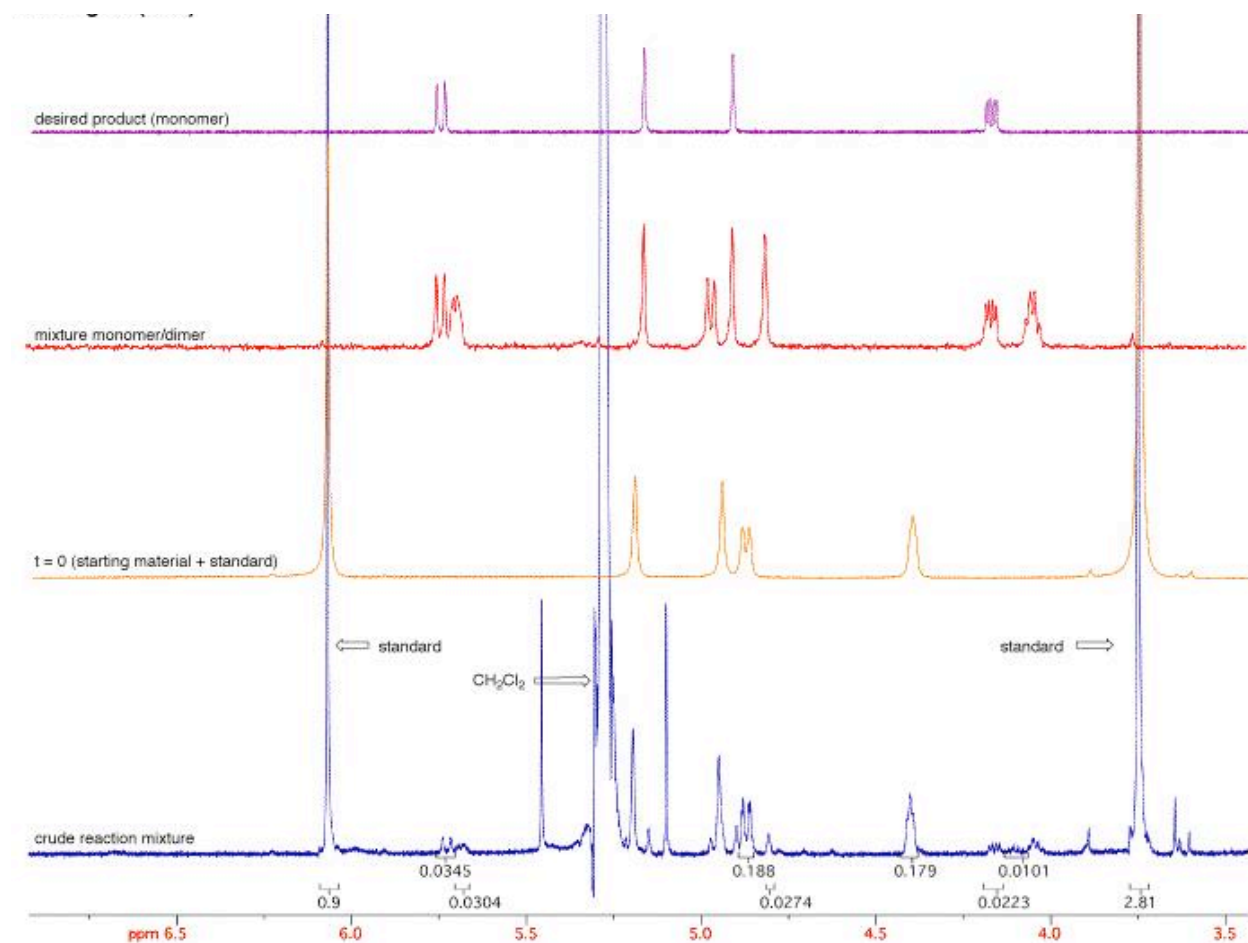

**Supplementary Figure 21. Monitoring of macrocyclization experiments by  $^1\text{H-NMR}$ .** Example of  $^1\text{H-NMR}$  spectra for the conversion of *seco*-acid **22a** to macrolactone **23a**. The desired monomeric macrocyclic product **23a** (top), a mixed fraction containing authentic samples of monomeric and dimeric macrocyclic products (second), the starting material **22a** and internal standard 1,3,5-trimethoxybenzene at  $t = 0$  (third), and the crude reaction mixture (bottom). While some signals in the crude reaction mixture overlap with the  $\text{CH}_2\text{Cl}_2$  solvent signal, there are sufficient isolated signals to identify and quantify all components of the reaction mixture.

## 2. MACROLACTAMIZATION OF *N*-NOSYL AMINO ACID (S22) WITH DCC OR HATU

### a. Control experiments confirming the suitability of *N*-nosyl-protected amines as nucleophiles in lactamization reactions

To validate *N*-nosyl amines as competent nucleophiles in both DCC- and HATU-mediated cyclization reactions, positive control experiments were carried out using *N*-nosyl-5-aminovaleric acid (**S19**). This substrate was converted efficiently to *N*-nosyl-valerolactam (**S20**) upon exposure to DCC (with 4-pyrrolidinopyridine) or HATU (with either  $\text{Et}_3\text{N}$  or DBU).

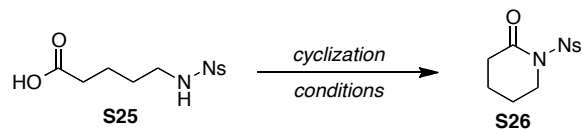

| method | cyclization conditions                           | yield (%) |
|--------|--------------------------------------------------|-----------|
| A      | DCC, 4-PPy, CH <sub>2</sub> Cl <sub>2</sub> , rt | 81        |
| B      | HATU, DBU, DMF, rt                               | 75        |
| C      | HATU, Et <sub>3</sub> N, DMF, rt                 | 79        |

**Supplementary Figure 22. Positive control experiments demonstrating cyclization of *N*-nosyl-5-aminovaleric acid (S25).** *N*-nosyl amines were validated as competent nucleophiles for HATU- and DCC-mediated cyclizations through the conversion of *N*-nosyl-5-aminovaleric acid **S25** to *N*-nosyl valerolactam **S26**. (HATU = 2-(1*H*-7-azabenzotriazol-1-yl)-1,1,3,3-tetramethyl uronium hexafluorophosphate methanaminium; 4-PPy = 4-pyrrolidinopyridine; DBU = 1,8-diazabicyclo[5.4.0]undec-7-ene.)

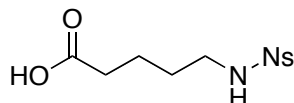

**5-(2-Nitrophenylsulfonamido)pentanoic acid (S25).** In a 15 mL roundbottom flask, *N*-nosyl valerolactam<sup>20</sup> **S26** (200 mg, 0.704 mmol) was dissolved in THF (10.0 mL). 2.0 M KOH (2.1 mL, 4.2 mmol, 6.0 equiv) was added and the mixture was heated to 60 °C for 1 h. The reaction was cooled to rt and 1.0 M HCl (8.0 mL) was added. The resulting mixture was extracted with EtOAc (3×). The combined organic extracts were washed with water and brine, dried (MgSO<sub>4</sub>), filtered, and concentrated by rotary evaporation. Purification by silica flash chromatography (9:1 CH<sub>2</sub>Cl<sub>2</sub>/MeOH) afforded **S25** as a white solid (189 mg, 89%).

**TLC:** *R<sub>f</sub>* 0.45 (9:1 CH<sub>2</sub>Cl<sub>2</sub>/MeOH). **mp** = 79.9–81.3 °C. **IR** (NaCl, film): 3333 (m, br, N-H), 3099 (w), 2943 (m), 1707 (s, C=O st), 1540 (vs, N=O st), 1414 (m), 1363 (s), 1340 (s, N=O st), 1164 (vs, S=O st), 1126 (w), 854 (w), 783 (w), 740 (m), 731 (m), 655 (m). **<sup>1</sup>H-NMR** (500 MHz): δ 8.07 (dt, 1H, *J* = 5.9, 3.4), 7.81 (ddq, 3H, *J* = 17.5, 6.4, 3.4), 3.06 (t, 2H, *J* = 6.7), 2.25 (t, 2H, *J* = 7.1), 1.61–1.50 (m, 4H). **<sup>13</sup>C-NMR** (125 MHz): δ 177.2, 149.6, 134.9, 134.8, 133.5, 131.4, 125.8, 43.9, 34.2, 30.2, 22.9. **ESI-MS** *m/z* (rel int): (pos) 325 ([M+Na]<sup>+</sup>, 50), 627 ([2M+Na]<sup>+</sup>, 100); (neg) 301 ([M-H]<sup>-</sup>, 100), 301 ([M+Cl]<sup>-</sup>, 40), 603 ([2M-H]<sup>-</sup>, 40).

<sup>20</sup> Grant, T. N.; Benson, C. L.; West, F. G. *Org. Lett.* **2008**, *10*, 3985.

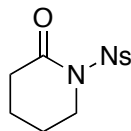**1-(2-Nitrobenzenesulfonyl)piperidin-2-one (S26)**<sup>20</sup>

**Method A (DCC, 4-PPy):**<sup>21</sup> In a 10 mL roundbottom flask, *N*-nosyl amino acid **S25** (10 mg, 0.033 mmol) was dissolved in CH<sub>2</sub>Cl<sub>2</sub> (3.3 mL). 4-Pyrrolidinopyridine (0.50 mg, 0.040 mmol, 0.10 equiv) and DCC (7.5 mg, 0.036 mmol, 1.1 equiv) were added and the mixture was stirred at rt for 15 h, after which nearly full conversion of the starting material was observed by TLC analysis. Satd aq NaHCO<sub>3</sub> was added and the resulting mixture was extracted with CH<sub>2</sub>Cl<sub>2</sub> (3×). The combined organic extracts were washed with brine, dried (MgSO<sub>4</sub>), filtered, and concentrated by rotary evaporation. Purification by silica flash chromatography (CH<sub>2</sub>Cl<sub>2</sub>) afforded lactam **S26** as a white solid (7.6 mg, 81%). All characterization data were in agreement with literature precedent.<sup>20</sup>

**Method B (HATU, DBU):** In a 10 mL round bottom flask, *N*-nosyl amino acid **S25** (5.0 mg, 0.017 mmol) was dissolved in DMF (8.3 mL). DBU (5.0 μL, 0.033 mmol, 2.0 equiv) and HATU (12.6 mg, 0.033 mmol, 2.0 equiv) were added and the mixture was stirred at rt for 12 h. Water was added and the resulting mixture was extracted with EtOAc (3×). The combined organic extracts were washed with brine, dried (MgSO<sub>4</sub>), filtered, and concentrated by rotary evaporation. Purification by silica flash chromatography (CH<sub>2</sub>Cl<sub>2</sub>) afforded lactam **S26** as a white solid (3.5 mg, 75%). All characterization data were in agreement with literature precedent.<sup>20</sup>

**Method C (HATU, Et<sub>3</sub>N):** In a 25 mL round bottom flask, *N*-nosyl amino acid **S25** (5.0 mg, 0.017 mmol) was dissolved in DMF (8.3 mL). Et<sub>3</sub>N (3.4 mg, 0.033 mmol, 2.0 equiv) and HATU (12.6 mg, 0.033 mmol, 2.0 equiv) were added and the mixture was stirred at rt for 12 h. Water was added and the resulting mixture was extracted with EtOAc (3×). The combined organic extracts were washed with brine, dried (MgSO<sub>4</sub>), filtered, and concentrated by rotary evaporation. Purification by silica flash chromatography (CH<sub>2</sub>Cl<sub>2</sub>) afforded lactam **S26** as a white solid (3.7 mg, 79%). All characterization data were in agreement with literature precedent.<sup>20</sup>

<sup>21</sup> Tanner, D.; Somfai, P. *Tetrahedron*, **1988**, *44*, 613.

**b. Attempted macrolactamizations of *N*-nosyl amino acid **S22****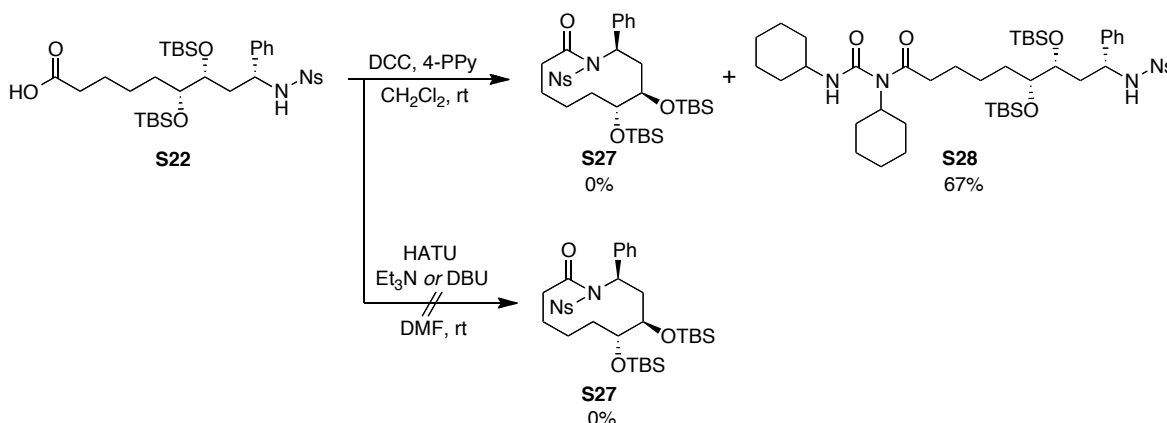

**Supplementary Figure 23. Attempted macrolactamization of *N*-nosyl amino acid **S22**.** Reaction of *N*-nosyl amino acid **S22** with DCC led only to the *N*-acyl urea **S28** instead of the desired macrolactam **S27**. Exposure of **S22** to HATU led to an intractable mixture of products. (Ns = 2-nitrobenzenesulfonyl; 4-PPy = 4-pyrrolidinopyridine; HATU = 2-(1*H*-7-azabenzotriazol-1-yl)-1,1,3,3-tetramethyl uronium hexafluorophosphate methanaminium; DBU = 1,8-diazabicyclo[5.4.0]undec-7-ene.)

**Attempted macrolactamization of *N*-nosyl amino acid **S22** using Method A (DCC, 4-PPy)**

Macrolactamization of *N*-nosyl-protected amino acid **S22** was attempted using a procedure identical to that reported by Tanner and coworkers for the cyclization of *N*-tosyl-protected amino acids in the synthesis of 4–9-membered ring lactams.<sup>21</sup>

In a flame-dried, Ar-flushed 4 mL vial equipped with a magnetic stir bar and septum, *N*-nosyl amino acid **S22** (6.6 mg, 9.5  $\mu$ mol) was dissolved in  $\text{CH}_2\text{Cl}_2$  (1.0 mL). DCC (2.1 mg, 10  $\mu$ mol, 1.1 equiv) and 4-pyrrolidinopyridine (0.14 mg, 0.95  $\mu$ mol, 0.1 equiv) were added and the reaction was stirred for 20 h, after which TLC analysis indicated that the majority of starting material had been consumed and a single streaky spot had appeared. Sat aq  $\text{NaHCO}_3$  was added and the resulting mixture was extracted with  $\text{CH}_2\text{Cl}_2$  (3 $\times$ ). The combined organic extracts were washed with brine, dried ( $\text{MgSO}_4$ ), filtered, and concentrated by rotary evaporation. Purification by silica flash chromatography (4:1 hexanes/ $\text{EtOAc}$ ) afforded a linear compound (5.7 mg, 67%) presumed based on NMR and MS analysis to be *N*-acyl urea **S28**, formed by isomerization of the corresponding *O*-acyl isourea initially formed in the activation of amino acid **S22** by DCC.<sup>22</sup>

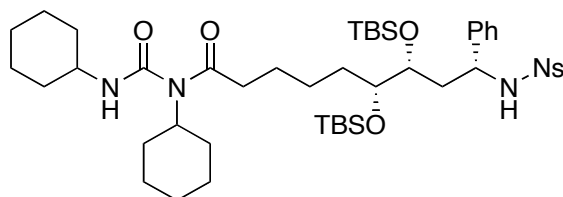

**(6*R*\*,7*R*\*,9*R*\*)-6,7-Bis(*tert*-butyldimethylsilyloxy)-*N*-cyclohexyl-*N*-(cyclohexylcarbamoyl)-9-(2-nitrophenylsulfonamido)-9-phenylnonanamide (**S28**).** TLC:  $R_f$  0.35 (4:1 hexanes/

<sup>22</sup> (a) Kurzer, F.; Douraghi-Zadeh, K. *Chem. Rev.* **1967**, 67, 107. (b) Neises, B.; Steglich, W. *Angew. Chem. Intl. Ed.* **1978**, 17, 522. (c) Boden, E. P.; Keck, G. E. *J. Org. Chem.* **1985**, 50, 2394.

EtOAc). **IR** (NaCl, film): 2951 (m), 2930 (m), 2857 (m), 1710 (s), 1693 (s), 1681 (s), 1660 (s), 1643 (vs), 1545 (vs, N=O st), 1412 (m), 1362 (m), 1261 (m), 1233 (s), 1172 (vs, S=O st), 1097 (m), 1077 (m), 920 (w), 855 (m), 778 (m). **<sup>1</sup>H-NMR** (500 MHz):  $\delta$  7.64 (dd, 1H,  $J = 8.2, 1.2$ ), 7.44–7.41 (m, 2H), 7.22 (td, 1H,  $J = 7.7, 1.1$ ), 7.01–6.96 (m, 5H), 5.74 (d, 1H,  $J = 9.7$ ), 4.72–4.67 (m, 1H), 4.03 (dd, 1H,  $J = 9.8, 4.6$ ), 3.88–3.81 (m, 1H), 3.69–3.61 (m, 2H), 2.39–2.36 (m, 2H), 2.10 (dd, 1H,  $J = 14.0, 11.8$ ), 1.96–1.88 (m, 4H), 1.81–1.51 (m, 17H), 1.37–1.12 (m, 13H), 0.97 (d, 18H,  $J = 5.9$ ), 0.30 (s, 3H), 0.17 (s, 3H), 0.15 (s, 3H), 0.09 (s, 3H). **<sup>13</sup>C-NMR** (125 MHz):  $\delta$  154.1, 147.2, 140.7, 134.8, 132.4, 132.2, 130.6, 128.3, 127.5, 126.4, 124.6, 74.4, 71.2, 56.6, 49.6, 39.0, 35.9, 32.8, 30.9, 29.7, 26.4, 26.0, 25.9, 25.7, 25.5, 25.3, 24.7, 18.0, 1.0, –3.9, –3.9, –4.5, –4.6. **ESI-MS**  $m/z$  (rel int): (pos) 924 ( $[M+Na]^+$ , 100); (neg) 900 ( $[M-H]^-$ , 100).

#### ***Attempted macrolactamization of *N*-nosyl amino acid S22 using Method B (HATU, DBU)***

To investigate a more active acylation reagent, we attempted macrolactamization using HATU and DBU.

In a flame-dried, Ar-flushed 4 mL vial equipped with a magnetic stir bar and septum, *N*-nosyl amino acid **S22** (0.5 mg, 0.7  $\mu$ mol) was dissolved in DMF (0.36 mL). DBU (0.22 mg, 1.4  $\mu$ mol, 2.0 equiv) and HATU (0.54 mg, 1.4  $\mu$ mol, 2.0 equiv) were added and the reaction was stirred overnight at rt, after which TLC analysis indicated complete consumption of the starting material and the appearance of multiple streaky, low-running spots. Satd aq  $NH_4Cl$  was added and the resulting mixture was extracted with EtOAc (3 $\times$ ). The combined organic extracts were washed with brine, dried ( $MgSO_4$ ), filtered, and concentrated by rotary evaporation. <sup>1</sup>H-NMR analysis of the crude product revealed an intractable mixture with no identifiable signals. ESI-MS analysis of the crude product did not produce peaks with identifiable  $m/z$ .

#### ***Attempted macrolactamization of *N*-nosyl amino acid S22 using Method C (HATU, Et<sub>3</sub>N)***

We suspected that the strong basicity of DBU may have contributed to degradation of starting material or product in the attempted HATU-mediated macrolactamization of *N*-nosyl amino acid **S22** above. Thus, we attempted the same reaction with Et<sub>3</sub>N.

In a flame-dried, Ar-flushed 4 mL vial equipped with a magnetic stir bar and septum, *N*-nosyl amino acid **S22** (5.0 mg, 0.007 mmol) was dissolved in DMF (3.5 mL). Et<sub>3</sub>N (2.2 mg, 0.014 mmol, 2.0 equiv) and HATU (5.3 mg, 0.014 mmol, 2.0 equiv) were added and the mixture was stirred at rt for 12 h, after which TLC analysis indicated full conversion of the starting material to a single new spot. Water was added and the resulting mixture was extracted with EtOAc (3 $\times$ ). The combined organic extracts were washed with brine, dried ( $MgSO_4$ ), filtered, and concentrated by rotary evaporation. The crude product was purified by silica flash chromatography (4:1 hexanes/EtOAc). <sup>1</sup>H-NMR analysis of the isolated material revealed an intractable mixture, containing more than one compound, which could not be identified. ESI-MS analysis of this material did not produce peaks with identifiable  $m/z$ .

---



## **I. CHEMINFORMATIC ANALYSIS OF MACROCYCLES**

### **1. PRINCIPAL COMPONENT ANALYSIS**

To generate the plots shown in **Fig. 4a–c** of the manuscript and **Supplementary Fig. 5**, a total of 176 compounds (**Supplementary Table 1**) were compared by principal component analysis (PCA):<sup>23</sup>

- 40 top selling brand-name small molecule drugs by revenue in 2006<sup>24</sup> (**Supp. Fig. 24**)
- 10 drug-like pyrazolecarboxamides in the MLSMR from ChemBridge<sup>23c</sup> (**Supp. Fig. 25**)
- 10 drug-like dihydrotriazolopyrimidines in the MLSMR from Chem Div<sup>23c</sup> (**Supp. Fig. 25**)
- 60 natural products with diverse structures<sup>23c</sup> (**Supp. Fig. 26**)
- 24 macrocycle natural products (**Supp. Fig. 3**)
- 32 macrocycle library members (**Supp. Fig. 2**)

The 32 macrocycle library members were derived from **15a–f**, **16a–c**, **17–21**, **23a–d**, **24–26**, **27a–f**, **28**, **29**, and **31** via *in silico* desilylation as necessary (**Supplementary Fig. 2**).

A set of 20 physicochemical properties (**Supplementary Table 2**) for all 144 or 176 compounds, respectively, was obtained from PubChem and/or calculated using free online cheminformatics tools (Molinspiration<sup>25</sup>, VCCLab<sup>26</sup>), ChemDraw and manual inspection.<sup>23c</sup> These properties were selected based on several criteria. First, Lipinski parameters<sup>27</sup> ( $MW \leq 500$ ,  $\log P \leq 5$ ,  $HBA \leq 10$ ,  $HBD \leq 5$ ) and Veber parameters<sup>28</sup> ( $RotB \leq 10$ ,  $tPSA \leq 140 \text{ \AA}^2$ ) have been correlated with oral bioavailability. While oral bioavailability is not an immediate goal of most academic screening campaigns, some attention to these parameters is useful to the extent that they correlate partially to cell permeability,<sup>28</sup> which is relevant to the utility of new chemical probes discovered from library screening. Second, Tetko's calculated logS aqueous solubility (ALOGpS)<sup>29</sup> was included since compound solubility is critical in screening and is often problematic for commercial drug-like libraries. Third, several stereochemical parameters (nStereo, R, S, nStMW, RSdelta) were included as a first-order approximation of three-dimensional complexity, and to enable the differentiation of enantiomeric structures. Indeed, the number of stereogenic centers is a key distinguishing factor between synthetic drugs and natural products,<sup>30</sup> and has recently been

<sup>23</sup> (a) Moura-Letts, G.; DiBlasi, C. M.; Bauer, R. A.; Tan, D. S. *Proc. Natl. Acad. Sci. USA*, **2011**, *108*, 6745–6750. (b) Bauer, R. A.; DiBlasi, C. M.; Tan, D. S. *Org. Lett.* **2010**, *12*, 2084–2087, (c) For a full discussion, see: Bauer, R. A.; Wurst, J. M.; Tan, D. S. *Curr. Opin. Chem. Biol.* **2010**, *14*, 308–314.

<sup>24</sup> (a) Jón T. Njardarson Group Website – “Top 200 Brand-Name Drugs by Retail Dollars in 2006”: [http://cbc.arizona.edu/njardarson/group/sites/default/files/Top 200 Brand Name Drugs by Retail Dollars in 2006\\_0.pdf](http://cbc.arizona.edu/njardarson/group/sites/default/files/Top%20Brand%20Name%20Drugs%20by%20Retail%20Dollars%20in%202006_0.pdf) (b) Drug Topics Website – “Top 200 brand-name drugs by retail dollars in 2006”: <http://drugtopics.modernmedicine.com/drugtopics/Pharmacy+Facts+%26+Figures/Top-200-brand-name-drugs-by-retail-dollars-in-2006/ArticleStandard/Article/detail/405100?contextCategoryId=7604>

<sup>25</sup> MolInspiration – free on-line cheminformatics tool; <http://www.molinspiration.com/cgi-bin/properties>

<sup>26</sup> (a) Tetko, I. V., Virtual Computational Chemistry Laboratory; <http://www.vcclab.org/lab/alogs/> (b) Tetko, I. V.; Tanchuk, V. Y.; Kasheva, T. N.; Villa, A. E. P. *J Chem Inf Comput Sci* **2001**, *41*, 246–252.

<sup>27</sup> Lipinski, C. A.; Lombardo, F.; Dominy, B. W.; Feeney, P. J. *Adv. Drug Deliv. Rev.* **1997**, *23*, 3–25.

<sup>28</sup> Veber, D. F.; Johnson, S. R.; Cheng, H.-Y.; Smith, B. R.; Ward, K. W.; Kopple, K. D. *J. Med. Chem.* **2002**, *45*, 2615–2623.

<sup>29</sup> Tetko, I. V.; Tanchuk, V. Y.; Kasheva, T. N.; Villa, A. E. P. *J. Chem. Inf. Comput. Sci.* **2001**, *41*, 1488–1493.

<sup>30</sup> Feher, M.; Schmidt, J. M. *J. Chem. Inf. Comput. Sci.* **2003**, *43*, 218–227.

shown to impact protein binding selectivity and frequency.<sup>31</sup> Fourth, several additional parameters found previously to differentiate synthetic drugs and natural products were included.<sup>30</sup> Synthetic drugs tend to have higher nitrogen counts, while natural products tend to have higher oxygen counts (N,O). Natural products also tend to have fewer aromatic rings and more complex, fused ring systems (Rings, RngAr, RngSys, RngLg, RRSys). While analyses using larger compound datasets and parameter lists are possible, we believe that there is limited additional value to such an analysis in the context of library planning.

These data were assembled in a Microsoft Excel spreadsheet (*Supplementary Dataset 1 PCA.xls*) and average values for each parameter were calculated within each compound series. This hypothetical average molecule for each compound series was also included in the PCA analysis (**Supplementary Table 3**).

---

<sup>31</sup> Clemons, P. A.; Bodycombe, N. E.; Carrinski, H. A.; Wilson, J. A.; Shamji, A. F.; Wagner, B. K.; Koehler, A. N.; Schreiber, S. L. *Proc. Natl. Acad. Sci. U.S.A.* **2010**, *107*, 18787–18792.

**Supplementary Table 1. Compounds used in principal component analysis.**

| Series                                               |                                                                                                                                                                                                                                   | Compounds                                                                                                                                                                                                                          |                                                                                                                                                                                                                                                 |                                                                                                                                                                                                                         |
|------------------------------------------------------|-----------------------------------------------------------------------------------------------------------------------------------------------------------------------------------------------------------------------------------|------------------------------------------------------------------------------------------------------------------------------------------------------------------------------------------------------------------------------------|-------------------------------------------------------------------------------------------------------------------------------------------------------------------------------------------------------------------------------------------------|-------------------------------------------------------------------------------------------------------------------------------------------------------------------------------------------------------------------------|
| <b>Best-Selling Brand Name Drugs</b><br>(40 entries) | Lipitor<br>Nexium<br>Prevacid<br>Flonase<br>Serevent<br>Singulair<br>Effexor<br>Plavix<br>Zocor<br>Norvasc                                                                                                                        | Lexapro<br>Seroquel<br>Protonix<br>Ambien<br>Actos<br>Zolofit<br>Wellbutrin<br>Avandia<br>Risperdal<br>Zyprexa                                                                                                                     | Topamax<br>Toprol<br>Zetia<br>Fosamax<br>Abilify<br>Levaquin<br>Lamictal<br>Celebrex<br>Benazepril<br>Zyrtec                                                                                                                                    | Coreg<br>Valtrex<br>Adderall<br>Aciphex<br>Cymbalta<br>Crestor<br>Diovan<br>Tricor<br>Concerta<br>Imitrex                                                                                                               |
| <b>ChemBridge Library</b><br>(10 entries)            | <i>PubChem</i><br><i>Compound CIDs:</i><br>5771496                                                                                                                                                                                | 5771429<br>5771374<br>5771371                                                                                                                                                                                                      | 5309975<br>5309772<br>5309762                                                                                                                                                                                                                   | 5308431<br>5309246<br>5309020                                                                                                                                                                                           |
| <b>ChemDiv Library</b><br>(10 entries)               | <i>PubChem</i><br><i>Compound CIDs:</i><br>2529498                                                                                                                                                                                | 2529482<br>2474174<br>2471337                                                                                                                                                                                                      | 2474145<br>1340935<br>2490059                                                                                                                                                                                                                   | 2490046<br>2490068<br>1342784                                                                                                                                                                                           |
| <b>Natural Products</b><br>(60 entries)              | cephamycinC<br>spergualin<br>forskolin<br>daptomycin<br>echinocandinB<br>calicheamicin g1<br>geldanamycin<br>actinonin<br>discodermolide<br>monensin<br>calyculin A<br>amphotericin B<br>adriamycin<br>ginkgolide B<br>phorbol MA | mizoribine<br>SQ26180<br>thienamycin<br>validamycin<br>avermectin B1a<br>cyclosporin A<br>trapoxin B<br>vincristine<br>colchicine<br>trichostatin<br>fumagillin<br>staurosporine<br>erythromycin A<br>streptomycin<br>penicillin G | coformycin<br>arglabin<br>bestatin<br>midecamycin A <sub>1</sub><br>taxol<br>pseudomonic acid A<br>talaromycin B<br>spongistatin 1<br>radicicol<br>salicylihalamide A<br>brevetoxin B<br>rifamycin B<br>quinine<br>mycobactin S<br>telomestatin | compactin<br>artemisinin<br>plaunotol<br>rapamycin<br>FK506<br>lipstatin<br>bleomycin<br>brefeldin A<br>cytochalasin B<br>epothilone A<br>apoptolidin<br>lactacystin<br>duocarmycin A<br>zaragozic Acid A<br>vancomycin |
| <b>Macrocyclic Natural Products</b><br>(24 entries)  | decarestrictine A <sub>1</sub><br>diplodialide A<br>pinolidoxin<br>apicularen A<br>curvularin<br>pladienolide B                                                                                                                   | decarestrictine B<br>jasmine ketolactone<br>pyrenolide A<br>cladospolide A<br>lyngbouillose<br>fluvirucin A <sub>1</sub>                                                                                                           | decarestrictine C <sub>1</sub><br>phoracantholide I<br>ferrulactone 1<br>cladospolide B<br>methymycin<br>hypothemycin                                                                                                                           | decarestrictine D<br>phoracantholide J<br>2,4,6,8-Tetramethyl-3,4-dihydroxydec-8(9)-enolide<br>cladospolide D<br>neomethymycin<br>iriomoteolide 3a                                                                      |
| <b>Macrocyclic Library</b><br>(32 entries)           | <i>Derived from:</i>                                                                                                                                                                                                              | <b>15a,b,c,d,e,f</b><br><b>16a,b,c</b><br><b>17–21</b>                                                                                                                                                                             | <b>23a,b,c,d</b><br><b>24–26</b><br><b>27a,b,c,d,e,f</b>                                                                                                                                                                                        | <b>28</b><br><b>29</b><br><b>31</b>                                                                                                                                                                                     |



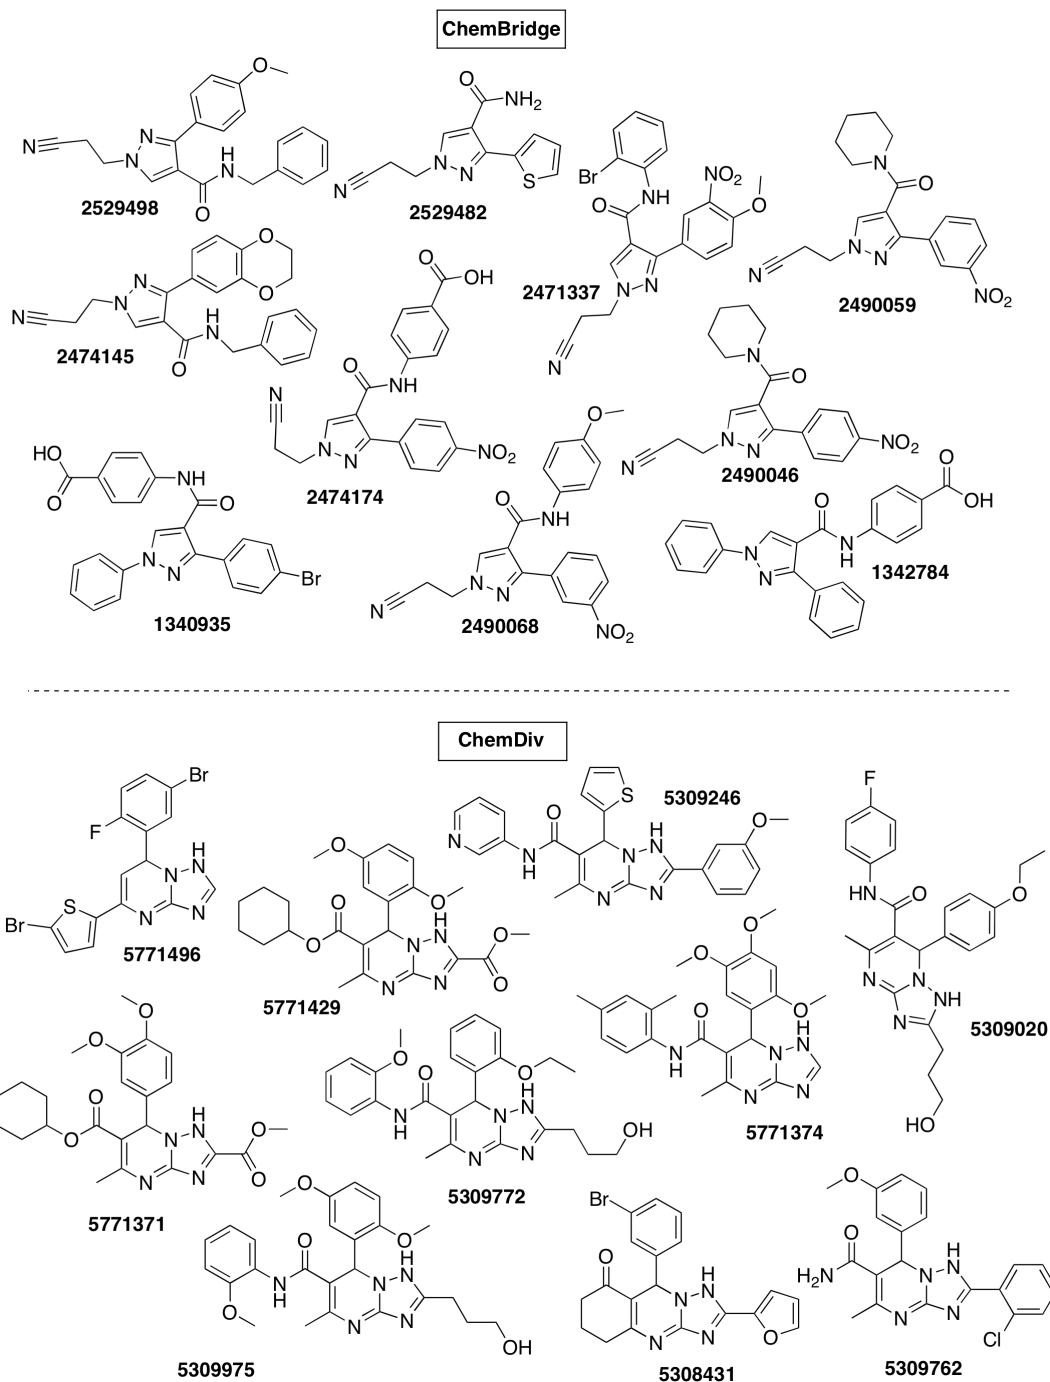

Supplementary Figure 25. ChemBridge and ChemDiv drug-like library reference sets for PCA.

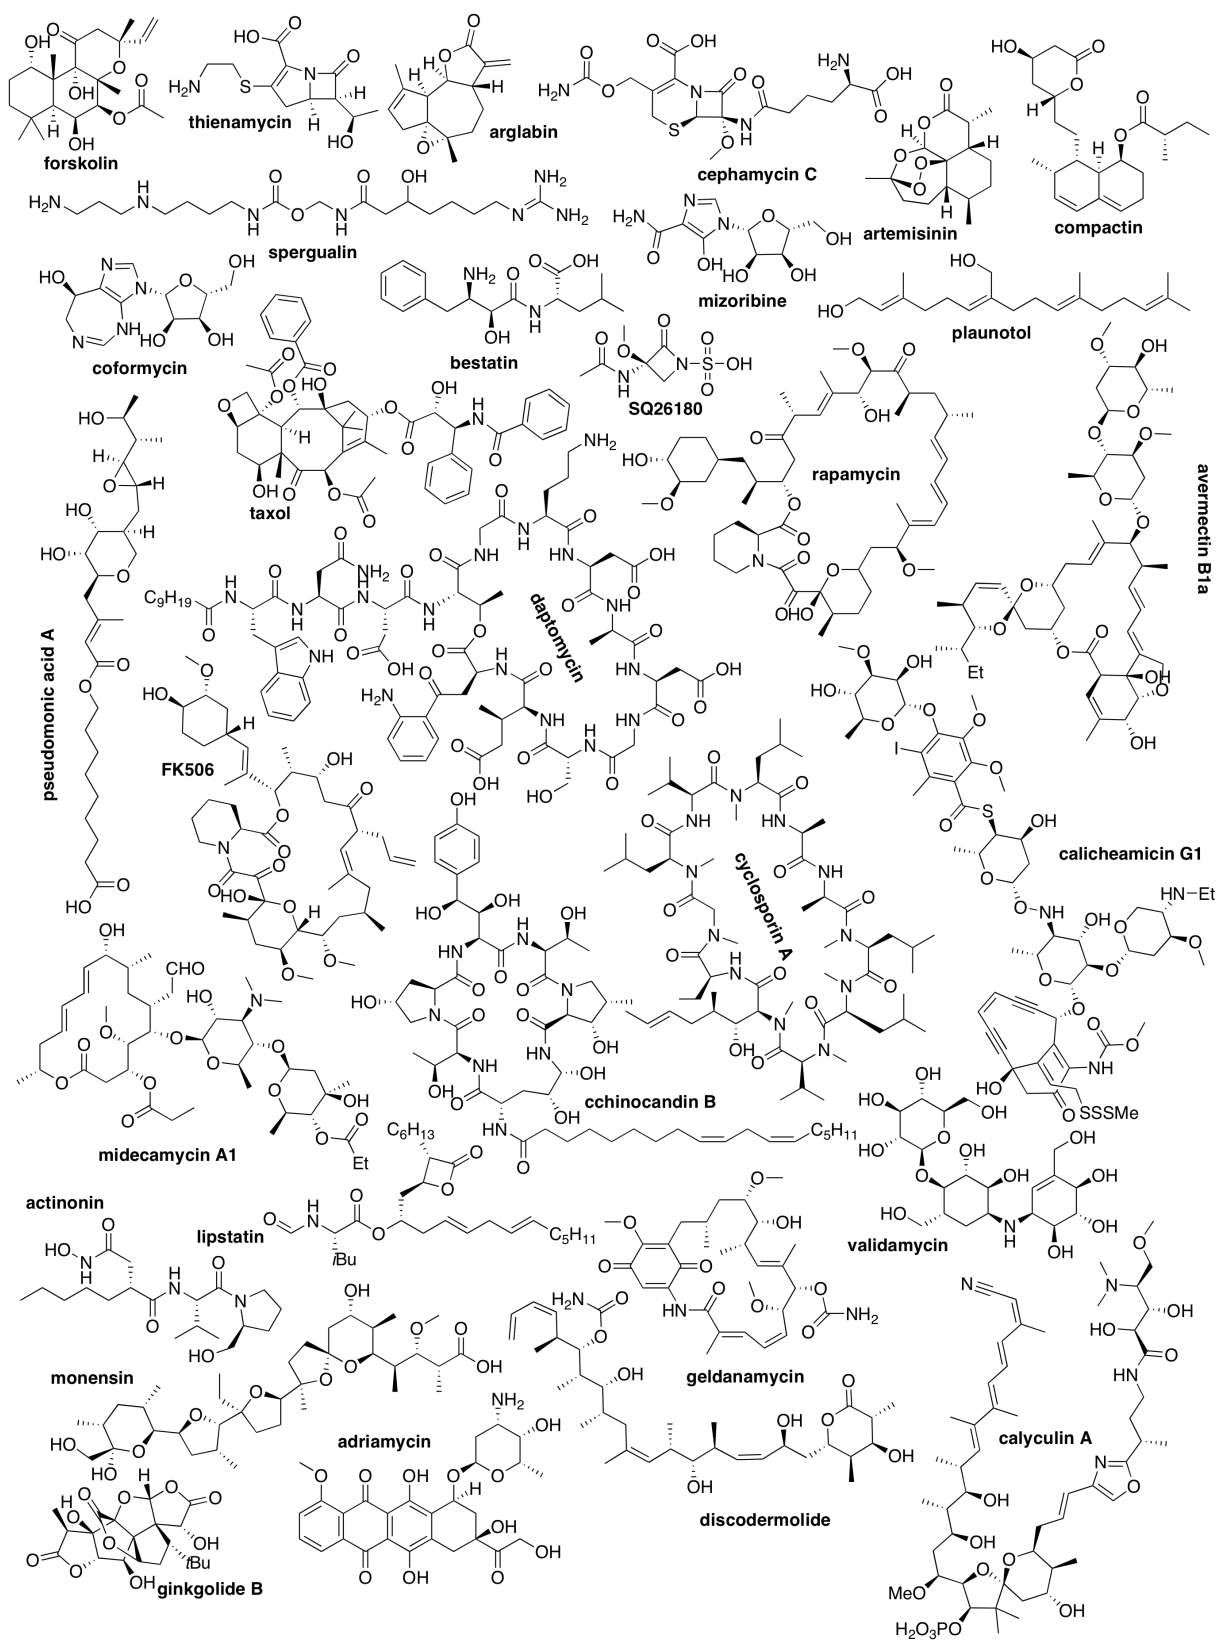

**Supplementary Figure 26. Natural product reference set for PCA (60 structures) (continued on next page).**

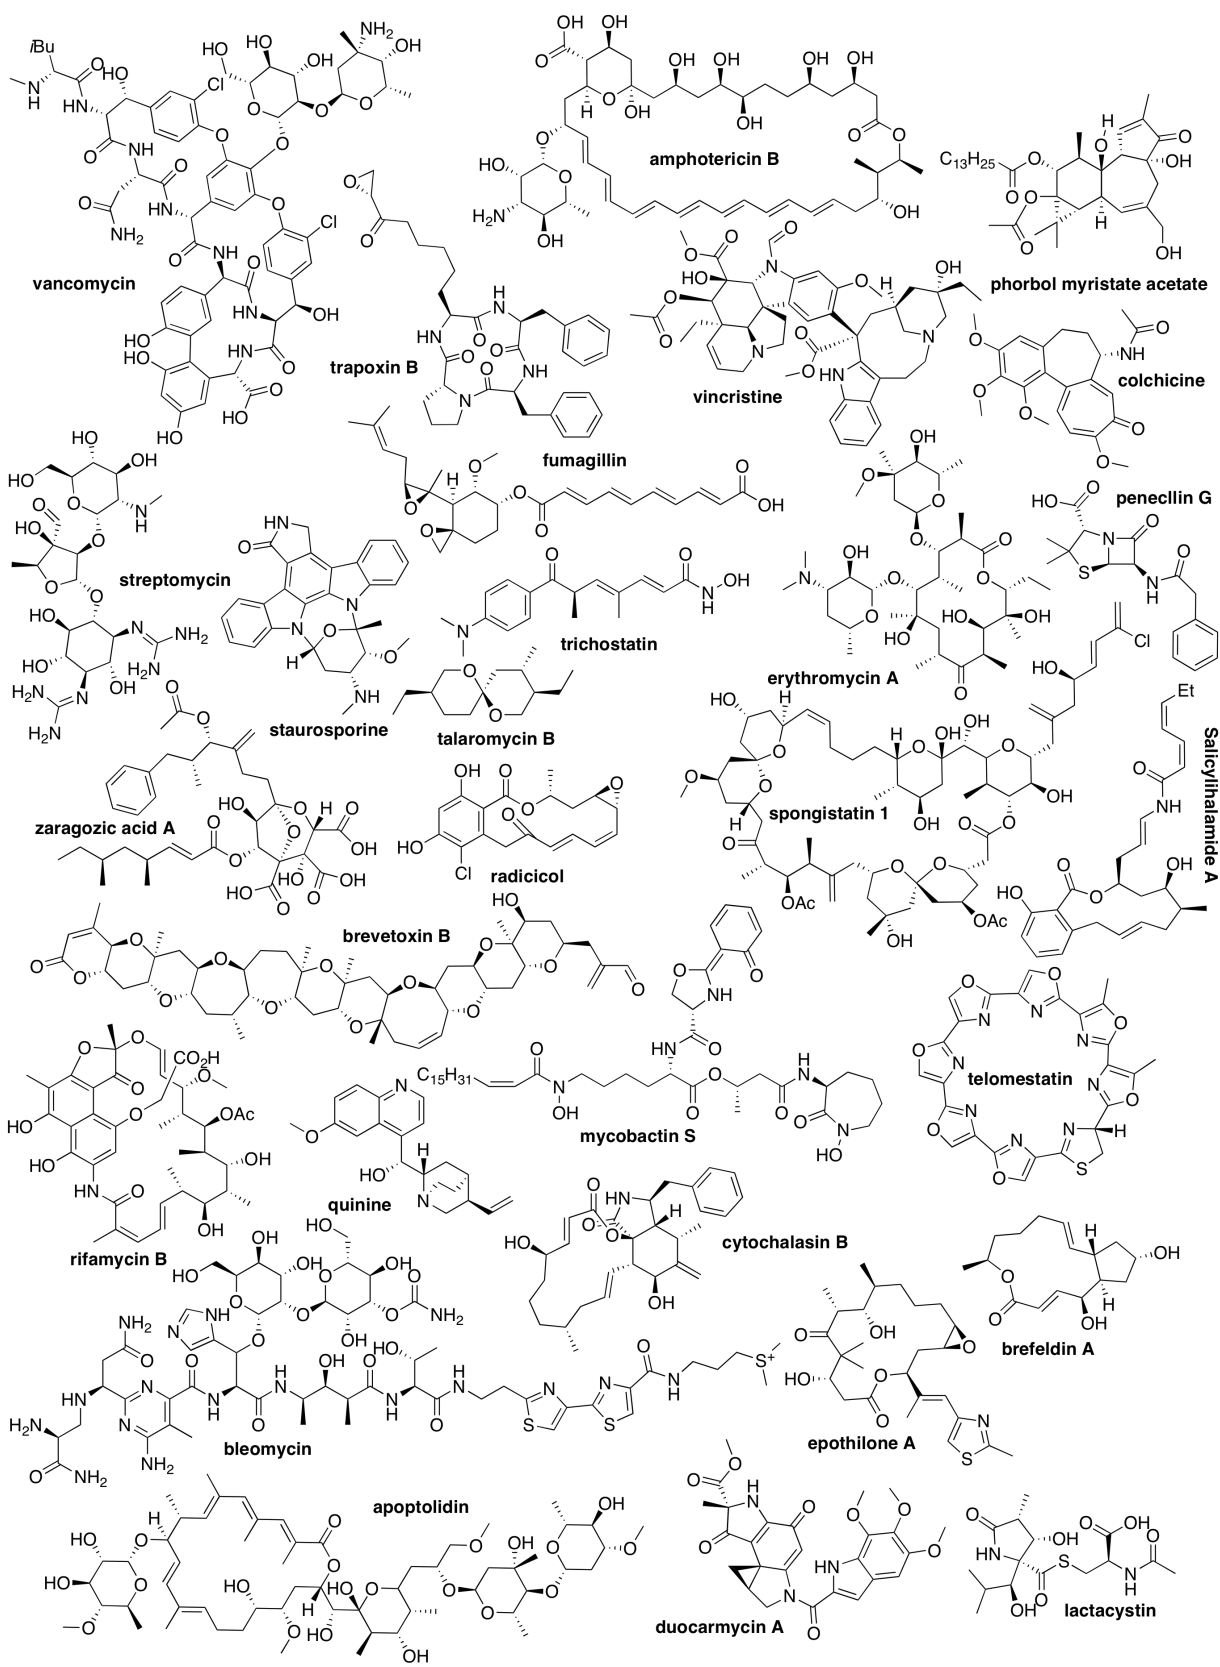

Supplementary Figure 26 (continued). Natural product reference set for PCA (60 structures).

**Supplementary Table 2. Structural and physicochemical parameters used in PCA.**

| Parameter | Description                                         | Method of Determination                                                   |
|-----------|-----------------------------------------------------|---------------------------------------------------------------------------|
| MW        | molecular weight                                    | ChemDraw Analysis Window                                                  |
| N         | number of nitrogens                                 | ChemDraw Analysis Window                                                  |
| O         | number of oxygens                                   | ChemDraw Analysis Window                                                  |
| XlogP     | calc <i>n</i> -octanol/water partition coefficient  | <a href="http://www.vcclab.org">http://www.vcclab.org</a>                 |
| HBD       | number of hydrogen bond donors                      | <a href="http://www.molinspiration.com">http://www.molinspiration.com</a> |
| HBA       | number of hydrogen bond acceptors                   | <a href="http://www.molinspiration.com">http://www.molinspiration.com</a> |
| RotB      | number of rotatable bonds                           | <a href="http://www.molinspiration.com">http://www.molinspiration.com</a> |
| tPSA      | topological polar surface area                      | <a href="http://www.molinspiration.com">http://www.molinspiration.com</a> |
| ALOGPs    | calc <i>n</i> -octanol/water partition coeff (alt)  | <a href="http://www.vcclab.org">http://www.vcclab.org</a>                 |
| ALOGpS    | calculated aqueous solubility                       | <a href="http://www.vcclab.org">http://www.vcclab.org</a>                 |
| nStereo   | number of stereocenters                             | <a href="http://www.molinspiration.com">http://www.molinspiration.com</a> |
| R         | number of R stereocenters                           | ChemDraw Show Stereochemistry                                             |
| S         | number of S stereocenters                           | ChemDraw Show Stereochemistry                                             |
| RSdelta   | <i>R</i> – <i>S</i>                                 | Microsoft Excel                                                           |
| nStMW     | <i>nStereo</i> ÷ <i>MW</i> (stereochemical density) | Microsoft Excel                                                           |
| Rings     | number of rings                                     | Manual inspection                                                         |
| RngAr     | number of aromatic rings                            | Manual inspection                                                         |
| RngSys    | number of ring systems                              | Manual inspection                                                         |
| RngLg     | number of atoms in largest ring outline             | Manual inspection                                                         |
| RRSys     | <i>Rings</i> ÷ <i>RngSys</i> (ring complexity)      | Microsoft Excel                                                           |

**Supplementary Table 3. Average structural and physicochemical parameters by compound series.**

† = nStMW × 1000 for clarity

|         | Drugs | NPs  | ChemBrg | ChemDiv | Macro NP | Macro Lib |
|---------|-------|------|---------|---------|----------|-----------|
| MW      | 361   | 629  | 381     | 446     | 303      | 316       |
| N       | 2.2   | 2.6  | 4.3     | 4.7     | 0.2      | 0.2       |
| O       | 2.9   | 9.7  | 3.1     | 3.4     | 4.8      | 4.3       |
| XLogP   | 2.7   | 1.5  | 2.9     | 1.8     | 2.0      | 3.0       |
| HBD     | 1.5   | 4.9  | 1.1     | 1.9     | 1.7      | 1.3       |
| HBA     | 5.4   | 10.8 | 5.9     | 7.7     | 5.0      | 4.5       |
| RotB    | 6.3   | 9.7  | 5.3     | 6.1     | 2.0      | 1.7       |
| tPSA    | 69    | 183  | 103     | 94      | 77       | 70.9      |
| ALOGPs  | 2.8   | 2.1  | 3.3     | 2.7     | 1.8      | 2.1       |
| ALOGpS  | -3.9  | -3.8 | -4.0    | -3.8    | -2.4     | -3.2      |
| nStereo | 1.4   | 9.1  | 0.0     | 1.0     | 4.4      | 2.4       |
| R       | 0.6   | 4.1  | 0.0     | 0.5     | 2.2      | 1.2       |
| S       | 0.8   | 5.0  | 0.0     | 0.5     | 2.3      | 1.2       |
| nStMW†  | 3.7   | 13.9 | 0.0     | 2.2     | 13.1     | 7.8       |
| RSdelta | -0.2  | -0.9 | 0.0     | 0.0     | -0.1     | 0.0       |
| Rings   | 2.9   | 3.8  | 3.2     | 4.2     | 1.6      | 2.4       |
| RngAr   | 2.1   | 1.0  | 2.9     | 2.9     | 0.1      | 1.3       |
| RngSys  | 2.1   | 2.0  | 3.1     | 3.1     | 1.2      | 2.1       |
| RngLg   | 8.4   | 15.8 | 6.3     | 9.4     | 12.3     | 11.6      |
| RRSys   | 1.4   | 2.3  | 1.0     | 1.4     | 1.4      | 1.1       |



To provide a visual representation of the position of each compound in chemical space, we then carried out principal component analysis with the “R” open source statistical computing package<sup>32</sup> to reduce the 20-dimensional vector corresponding to each compound to a 2-dimensional vector, with minimal loss of information. The detailed protocol is as follows:

- 1) In MS Excel, a “Raw” worksheet was created with compounds in rows and physicochemical descriptors in columns. Note that compound names must not have spaces or other punctuation.
- 2) Mean values were calculated for individual compound categories (*e.g.*, for “Drugs”, “Natural Products”, etc.). In addition, mean and standard deviation values were calculated for each column.
- 3) A “Norm” worksheet was created and mean-centered, standardized values were generated for each column using the equation:
 
$$\text{normval} = (\text{val} - \text{Column Mean}) / \text{Column Standard Deviation}$$
- 4) With the upper left cell blank (R requires this to recognize a header row), the Number format was designated for all data columns to 4 decimal places.
- 5) The Excel workbook was saved.
- 6) The “Norm” worksheet was saved as “Data.txt” (Text–Tab Delimited) on the Desktop (Mac).
- 7) The Excel workbook was closed and the changes discarded.
- 8) The “R” open source computing package was opened and the following commands were entered:
  - 9) R> read.table("~/Desktop/Data.txt") -> a # read data into dataframe a
  - 10) R> prcomp(a) -> b # PCA of dataframe a, results to b
  - 11) R> summary(b) # prints summary of %contributions
  - 12) R> b # prints the rotation (loading) matrix
  - 13) R> biplot(b, choices = c(1,2), col = c("gray", "red")) # Biplot of scores and eigenvectors for PC1 vs PC2
  - 14) R> biplot(b, choices = c(1,3), col = c("gray", "red")) # Biplot of scores and eigenvectors for PC1 vs PC3
  - 15) R> biplot(b, choices = c(3,2), col = c("gray", "red")) # Biplot of scores and eigenvectors for PC3 vs PC2
  - 16) R> b\$x # prints the rotated data (scores)
- 17) This final command prints the rotated data (scores) and the first section of the data was selected and copied (PC1–PC10, without top headers).
- 18) These results were pasted into a MS Word text file and the font changed to Courier 5 pt.
- 19) This MS Word file was Saved as... “Scores.txt” (Text Only with Line Breaks)
- 20) Excel was opened again and the scores were imported by selecting “Get External Data” in the Data menu, then “Import from Text file”.
- 21) The “Fixed” width button was left checked and dividers were adjusted, making sure to include minus signs in the second column (PC1) rather than the first (compound names).
- 22) This data file was imported into a new Excel worksheet “Scores”.
- 23) The first four columns (compound names, PC1, PC2, and PC3) were copied into a new worksheet “PCA”, and the Number format was designated to 3 decimal places.
- 24) Each group of compounds was then sorted in order of ascending PC1 to facilitate its location on the PCA plot.
- 25) With the PC1 and PC2 columns selected, the Scatter XY plot was selected in the Chart Wizard.
- 26) Series information for each set of compounds, *e.g.* Drugs, AVG Drug, etc., was entered and the chart formatted as desired.
- 27) Steps 25) and 26) were repeated to generate plots of PC1 vs PC3 and PC3 vs PC2.

<sup>32</sup> The R Project for Statistical Computing; <http://www.r-project.org/>

## PCA PLOT OF MACROCYCLE LIBRARY WITH MACROCYCLIC NATURAL PRODUCTS AND ESTABLISHED REFERENCE SETS

Following PCA, the 32 macrocycle library members, 24 macrocyclic natural products, and our established reference sets<sup>23</sup> were plotted on newly generated, unitless, orthogonal axes (principal components) that are based on linear combinations of the original 20 parameters (**Fig. 4a–c** of the manuscript, **Supplementary Fig. 5**, and *Supplementary Information Fig 4.xls*). Summary information from R is shown in **Supplementary Table 4**.

**Supplementary Table 4. Standard deviation and percent contribution for each principal component in PCA plot of macrocycle library (R Summary).**

|                               | PC1   | PC2   | PC3   | PC4   | PC5   | PC6   | PC7   | PC8   | PC9   | PC10  |
|-------------------------------|-------|-------|-------|-------|-------|-------|-------|-------|-------|-------|
| <b>Standard deviation</b>     | 2.929 | 1.858 | 1.699 | 1.343 | 1.080 | 0.823 | 0.639 | 0.503 | 0.450 | 0.391 |
| <b>Proportion of Variance</b> | 0.429 | 0.173 | 0.144 | 0.090 | 0.058 | 0.034 | 0.020 | 0.013 | 0.010 | 0.008 |
| <b>Cumulative Proportion</b>  | 0.429 | 0.602 | 0.746 | 0.836 | 0.894 | 0.928 | 0.949 | 0.961 | 0.971 | 0.979 |

These data indicate that >90% of the variance in the complete 20-dimensional dataset is accounted for by the first six principal components (PC1–PC6), due to correlations between some of the original 20 parameters. For visualization purposes, the first three principal components (PC1–PC3) were used to generate the plots shown in **Fig. 4a–c** of the manuscript. Together, these three principal components account for 74.6% of the variance in the complete dataset, with individual contributions of 42.9%, 17.3%, and 14.4%, respectively (**Supplementary Table 4**).

The Biplot() function in R was then used to display the loadings of the original 20 parameters on 2-dimensional principal component plots (**Supplementary Fig. 4**). These data indicate that O, MW, HBA, tPSA have the largest loadings on PC1 and shift compounds to the left in the PC1 vs. PC2 (**Supplementary Fig. 4a**) and PC1 vs. PC3 (**Supplementary Fig. 4c**) plots. The descriptors with the largest loadings on PC2 are RngAr and ALOGPs, which shift compounds to the top of the PC1 vs. PC2 and PC3 vs. PC2 (**Supplementary Fig. 4b**) plots, as well as nStMW and ALOGpS, which shift compounds to the bottom of the PC1 vs. PC2 and PC3 vs. PC2 plots. The descriptors with the largest loading on PC3 are XlogP, ALOGPs, and RRSys, which shift compounds in the negative direction along PC3, as well as N, which shifts compounds in the positive direction along PC3.

## 2. PRINCIPAL MOMENT OF INERTIA CALCULATIONS

Minimum energy conformers for each compound were generated by executing the stochastic conformational search algorithm, a variant of the random incremental pulse search (RIPS) method,<sup>33</sup> as implemented in the MOE molecular modeling software package.<sup>34</sup> The Merck Molecular Force Field (MMFF94) combined with the generalized Born (GB) solvation model of

<sup>33</sup> Ferguson, D. M.; Raber, D. J. *J. Am. Chem. Soc.* **1989**, *111*, 4371–4378.

<sup>34</sup> (a) MOE 2009.10; Chemical Computing Group: 1010 Sherbrooke St. W, Suite 910, Montreal, Quebec, Canada H3A 2R7. <http://www.chemcomp.com> (b) Chen, I.-J.; Foloppe, N. *J. Chem. Inf. Model.* **2008**, *48*, 1773–1791.

aqueous solvation were used. Conformational sampling of the potential energy surface was ensured by setting two key parameters, **maxConfs** (maximum number of conformations) and **Failure Limit** (number of failures in which no new conformations are generated after a specified number of consecutive attempts), to values established previously as being effective for the analysis of macrocycle libraries (further increases to these parameters do not result in the identification of additional conformers).<sup>35</sup> The computational job was carried out on a Linux cluster as a batch job. To consider biologically-relevant conformational space, all conformations within 3 kcal/mol of the minimum energy conformation were recorded. A conformation was considered as duplicate if the RMSD value was  $<0.15 \text{ \AA}$  upon superposition.

The parameters used for conformer generation are listed below:

**maxConfs:** 10000 (maximum number of conformations; default is 250)

**RMSD**  $\leq 0.15$  (threshold to check for duplicates)

**Failure Limit:** 100 (number of attempts to generate a new conformation above the RMSD threshold prior to terminating the search; default is 30)

**Energy cutoff:** 7 kcal/mol

**Iteration limit:** 10000 (number of attempts to generate a new conformation)

**MM Iteration limit:** 500 (maximum number of energy minimization steps performed for each conformer energy minimization search)

Upon completion of the job, three-dimensional descriptors, the three principal moments of inertia ( $I_{xx}$ ,  $I_{yy}$ ,  $I_{zz}$ ) and normalized principal moments of inertia,  $npr1$  ( $I_{xx}/I_{zz}$ ) and  $npr2$  ( $I_{yy}/I_{zz}$ ) were calculated. The  $npr1$  and  $npr2$  calculation is scripted in MOE.

Following the PMI analysis, the normalized PMI ratios were plotted for the 32 macrocycle library members, 24 macrocyclic natural products, and our established reference sets<sup>23</sup> on a triangular graph, with the vertices (0,1), (0.5,0.5), and (1,1) representing a perfect rod, disc, and sphere, respectively.<sup>36</sup> These data were assembled in a Microsoft Excel spreadsheet (*Supplementary Dataset 2 PMI.xls*). This provides a chemically intuitive, visual representation of the three-dimensional shape of each molecule. For ease of visualization, lowest energy conformers are plotted in **Fig. 4d** of the manuscript, while collections of conformers up to 3 kcal/mol above the lowest energy conformer are plotted in **Supplementary Fig. 7**.

<sup>35</sup> Marcaurette, L. A.; Comer, E.; Dandapani, S.; Duvall, J. R.; Gerard, B.; Kesavan, S.; Lee, M. D.; Liu, H.; Lowe, J. T.; Marie, J.-C.; Mulrooney, C. A.; Pandya, B. A.; Rowley, A.; Ryba, T. D.; Suh, B.-C.; Wei, J.; Young, D. W.; Akella, L. B.; Ross, N. T.; Zhang, Y.-L.; Fass, D. M.; Reis, S. A.; Zhao, W.-N.; Haggarty, S. J.; Palmer, M.; Foley, M. A. *J. Am. Chem. Soc.* **2010**, *132*, 16962–16976.

<sup>36</sup> Sauer, W. H. B.; Schwarz, M. K. *J. Chem. Inf. Comput. Sci.* **2003**, *43*, 987–1003.

**J. <sup>1</sup>H-NMR AND <sup>13</sup>C-NMR SPECTRA**

|                                                                                      |      |
|--------------------------------------------------------------------------------------|------|
| <b>1. SYNTHESIS OF BIS(TRIMETHYLSILOXY)DIENES (8, S2)</b>                            |      |
| a. 1,3-Diketones ( <b>7b,c,e,f</b> )                                                 | S101 |
| b. Bis(trimethylsiloxy)dienes ( <b>8a-f, S2</b> )                                    | S105 |
| <b>2. SYNTHESIS OF DIHYDROPYRONES AND DIHYDROPYRIDONES (9, 10, S3–S6)</b>            |      |
| a. Dihydropyrones ( <b>9a-f</b> )                                                    | S112 |
| b. Dihydropyridones ( <b>10a-c</b> )                                                 | S118 |
| c. Additional dihydropyrone intermediates ( <b>S3–S6</b> )                           | S121 |
| <b>3. SYNTHESIS OF TBS-PROTECTED ALCOHOLS (13, 14, S11–S15)</b>                      |      |
| a. Dihydroxyranols ( <b>11a-f</b> )                                                  | S125 |
| b. Additional dihydroxyranols ( <b>S7–S10</b> )                                      | S131 |
| c. Tetrahydropyridinols ( <b>12a-c</b> )                                             | S135 |
| d. TBS-protected alcohols ( <b>13a-f, 14a-c, S11–S15</b> )                           | S138 |
| <b>4. RING EXPANSION TO MACROLACTONES AND MACROLACTAMS (15–21)</b>                   |      |
| a. Macrolactones ( <b>15a-f</b> )                                                    | S152 |
| b. Macrolactams ( <b>16a-c</b> )                                                     | S158 |
| c. Additional macrolactones ( <b>17–21</b> )                                         | S161 |
| <b>5. FUNCTIONALIZATION OF MACROCYCLIC SCAFFOLDS (24–31)</b>                         |      |
| a. Aryl iodide cross-coupling products ( <b>24–26</b> )                              | S167 |
| b. Ketone reduction products ( <b>27a-f</b> )                                        | S170 |
| c. Ketone methylenation products ( <b>23a-d</b> )                                    | S177 |
| d. Hydroboration–oxidation and epoxidation products ( <b>28, 29</b> )                | S181 |
| e. Alcohol desilylation and acetylation products ( <b>30, 31</b> )                   | S183 |
| <b>6. SYNTHESIS OF RELATED SECO-ACIDS (22a–d, S22)</b>                               |      |
| a. <i>seco</i> -Acids ( <b>22a-d</b> )                                               | S185 |
| b. <i>N</i> -Nosyl amino acids ( <b>S20–S24</b> )                                    | S189 |
| <b>7. MACROCYCLIZATION EXPERIMENTS WITH RELATED SECO-ACIDS</b>                       |      |
| a. Simple <i>N</i> -nosyl amino acid analogue ( <b>S25</b> )                         | S192 |
| b. Byproduct of attempted <i>N</i> -nosyl amino acid macrocyclization ( <b>S28</b> ) | S193 |

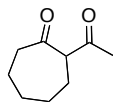**7b**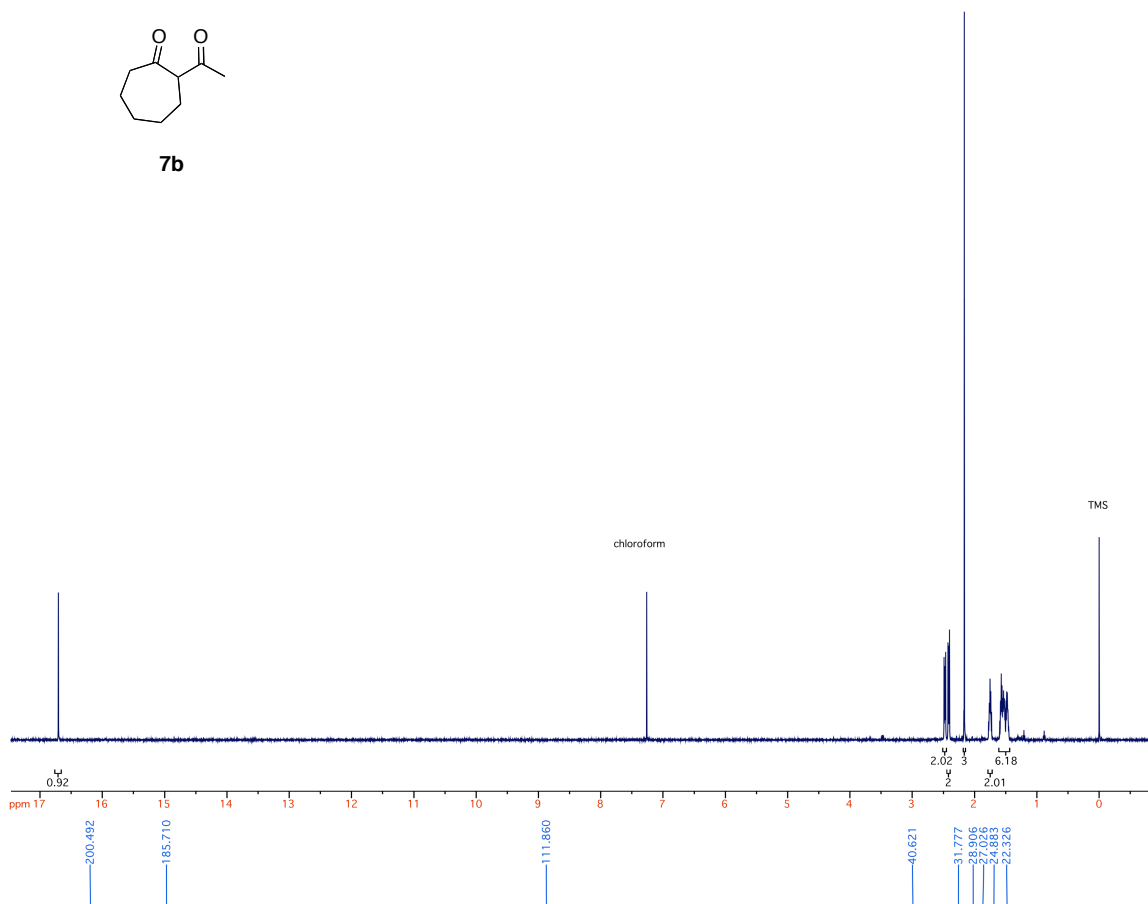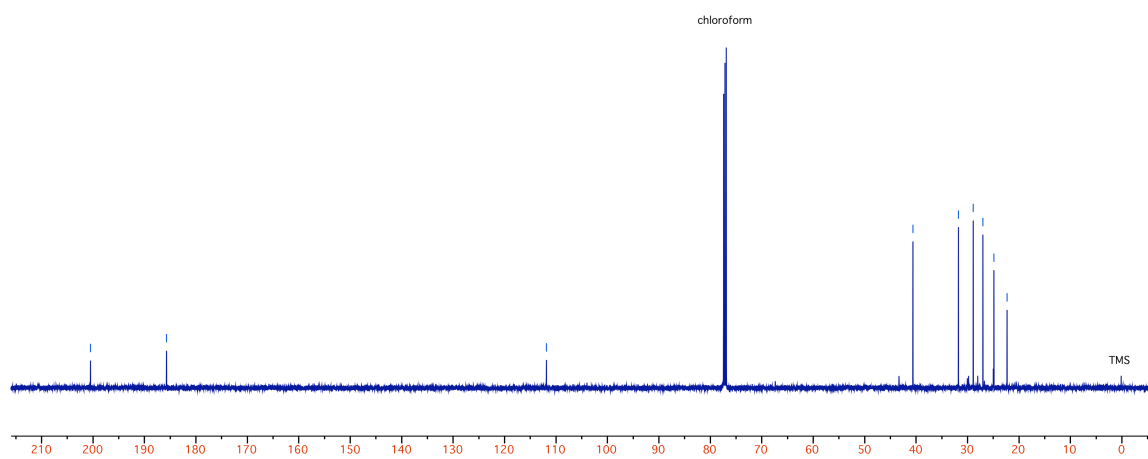

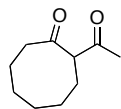**7c**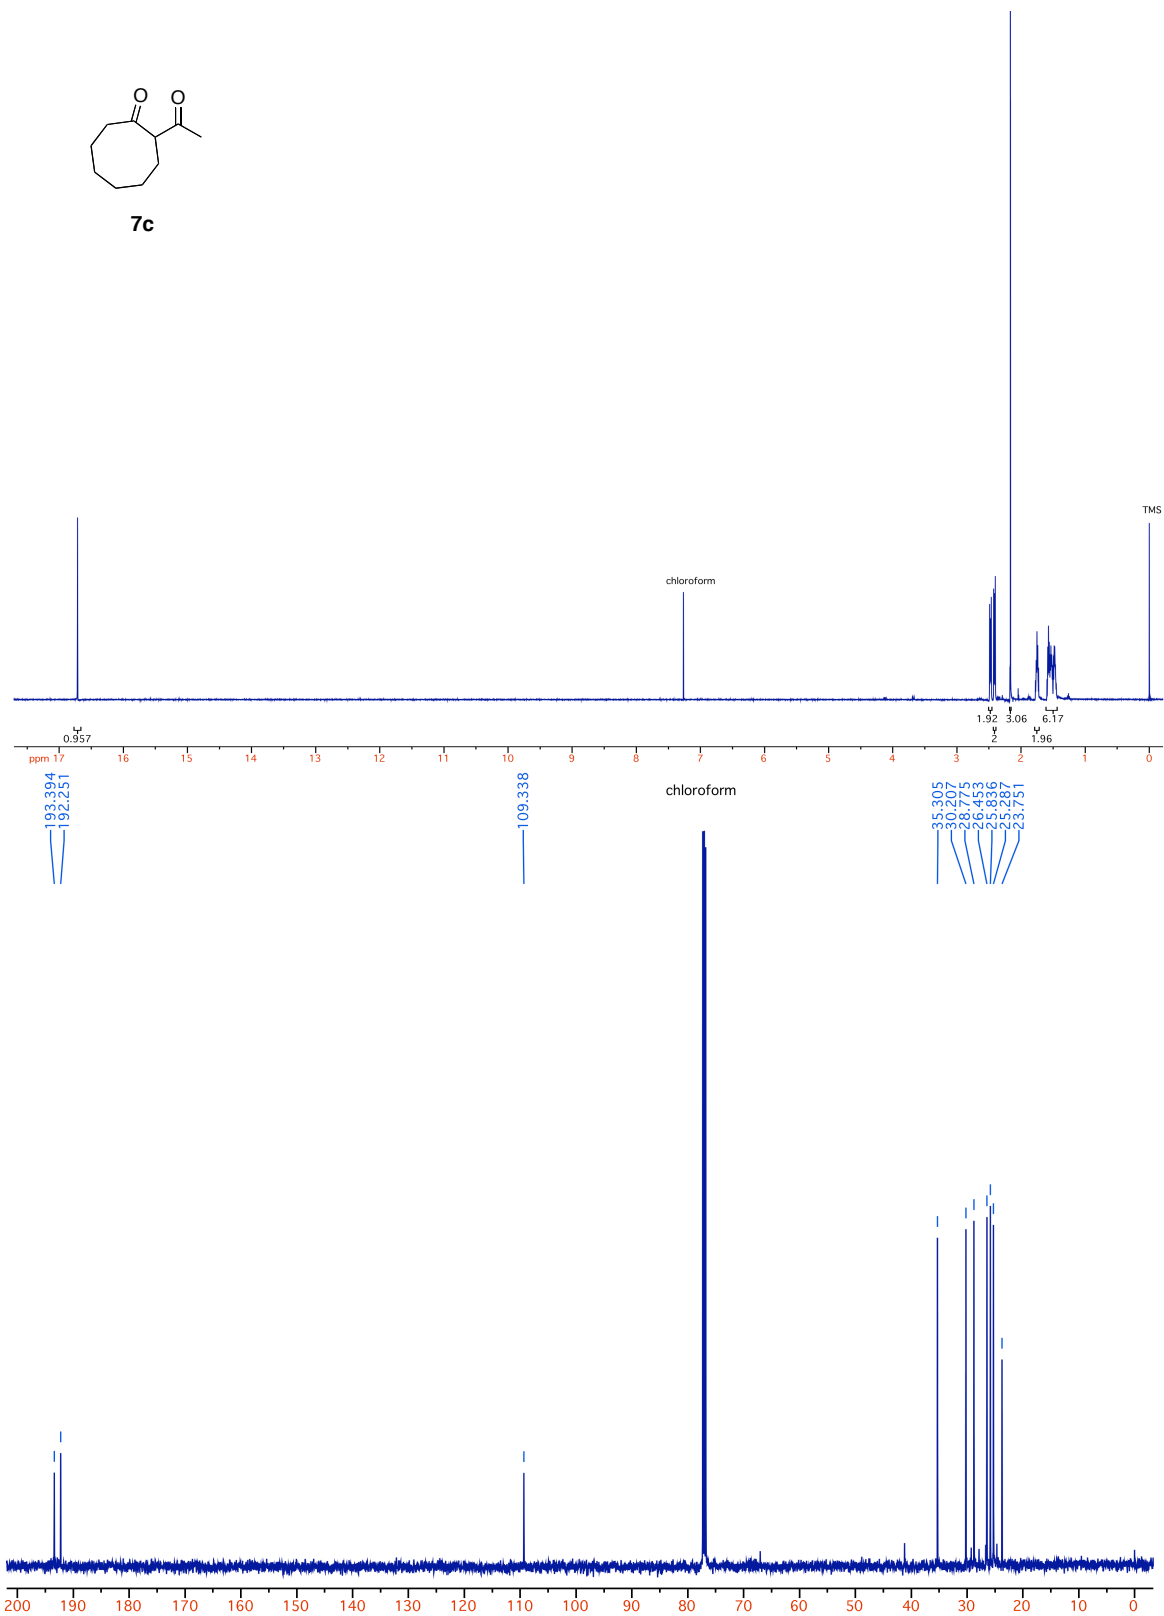

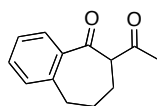**7e**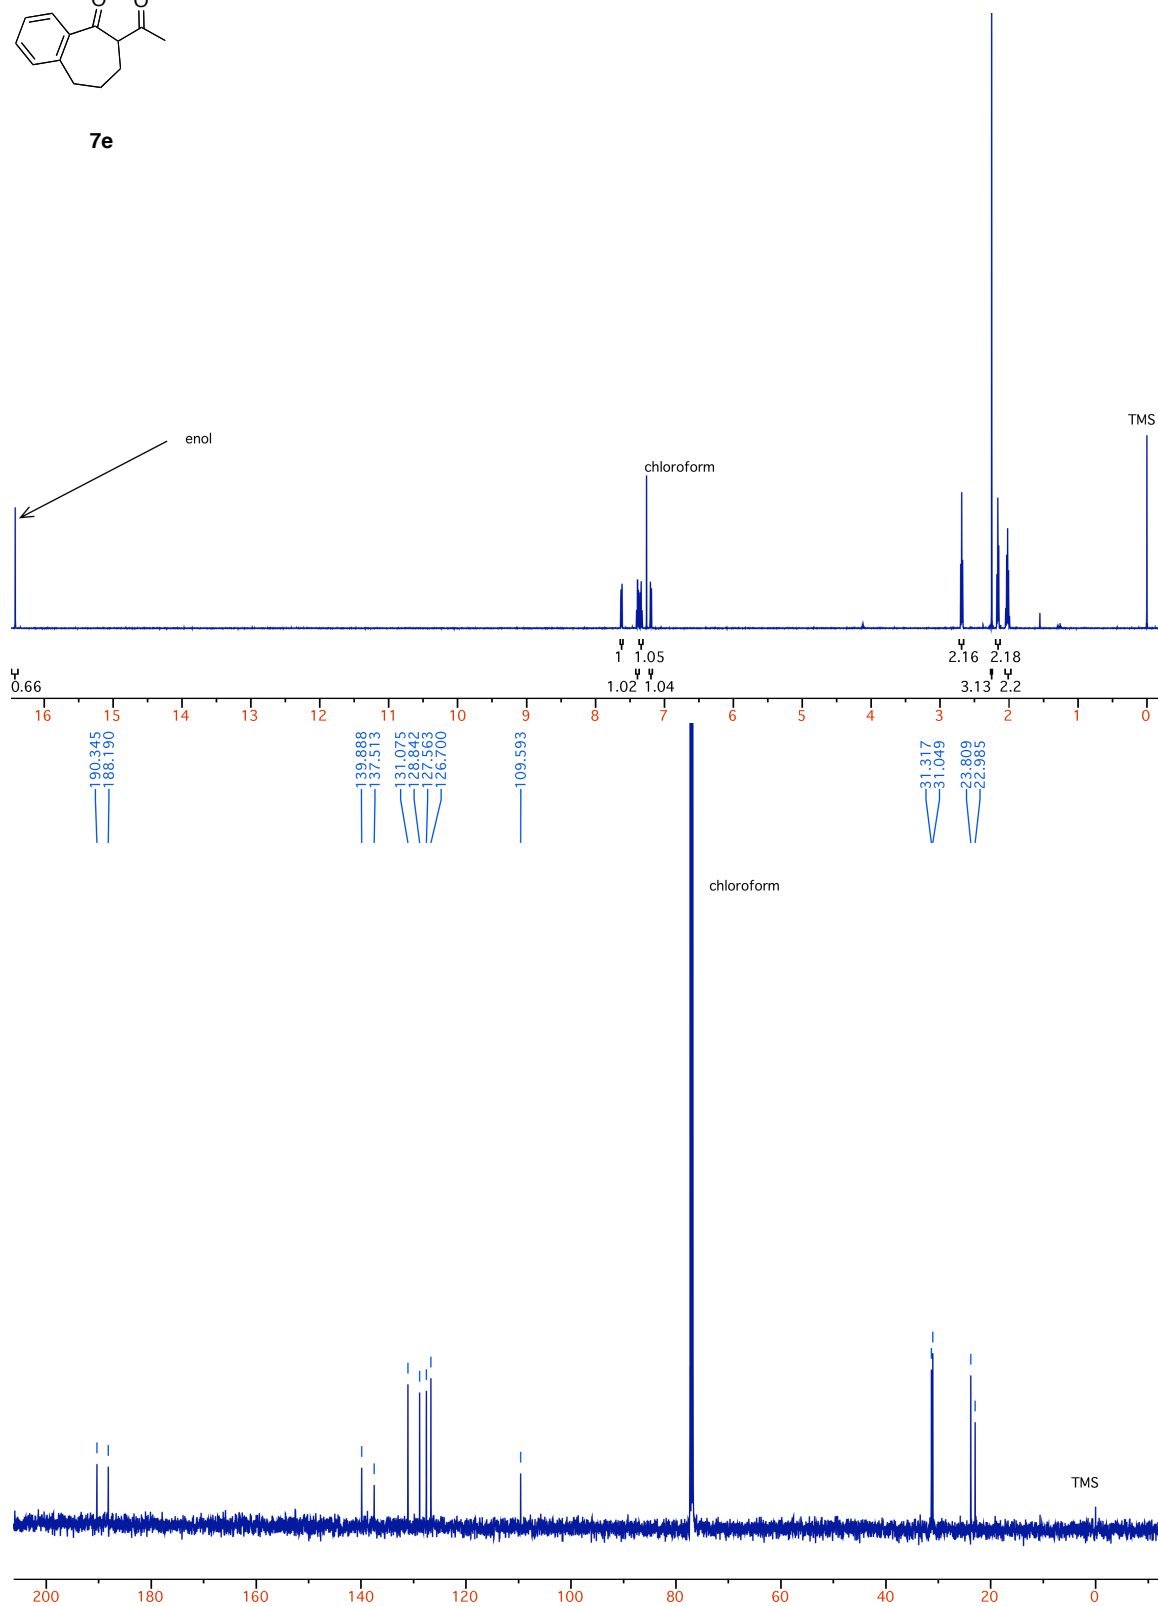

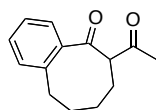**7f**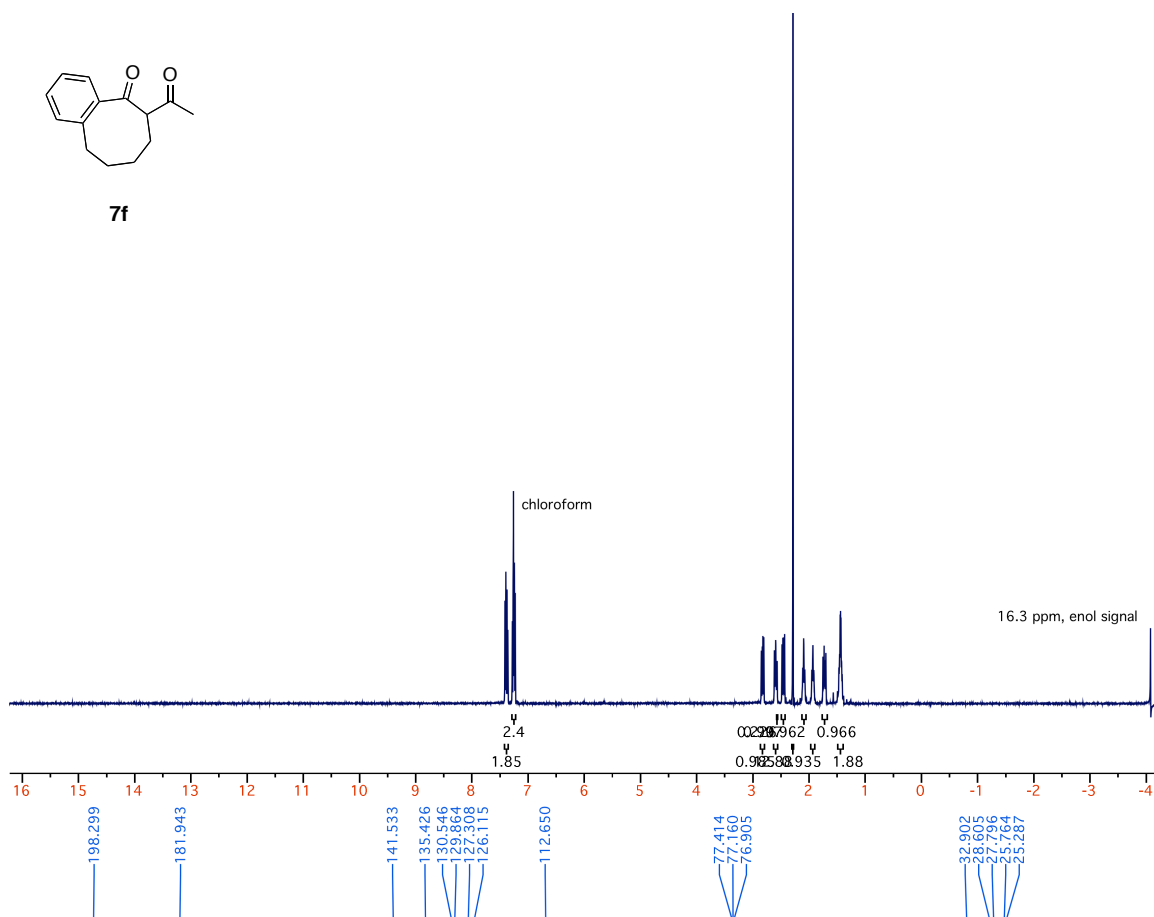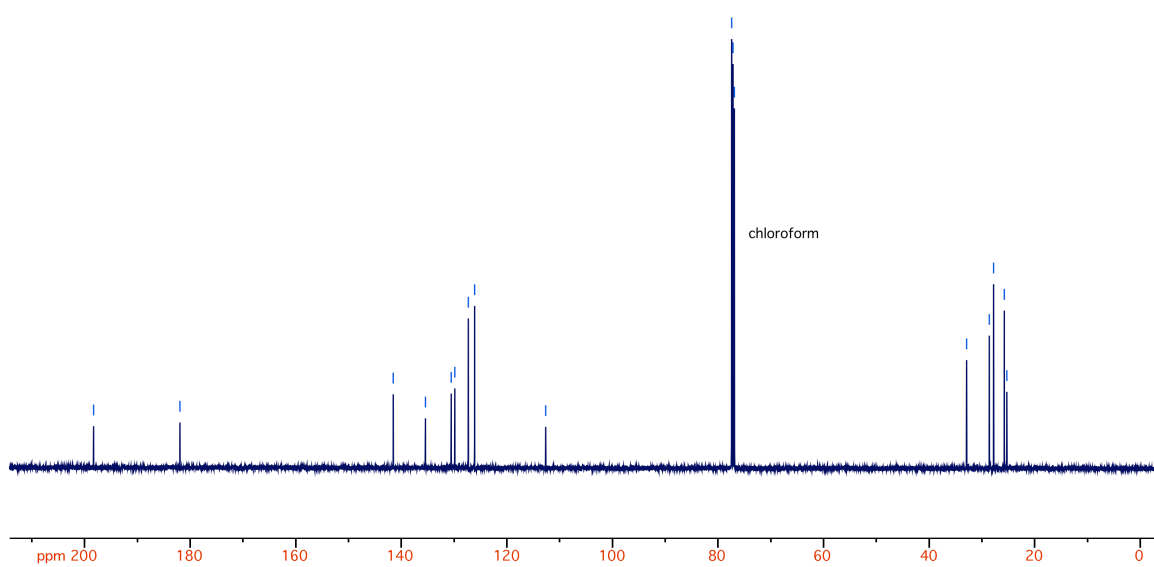



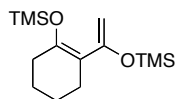**8a**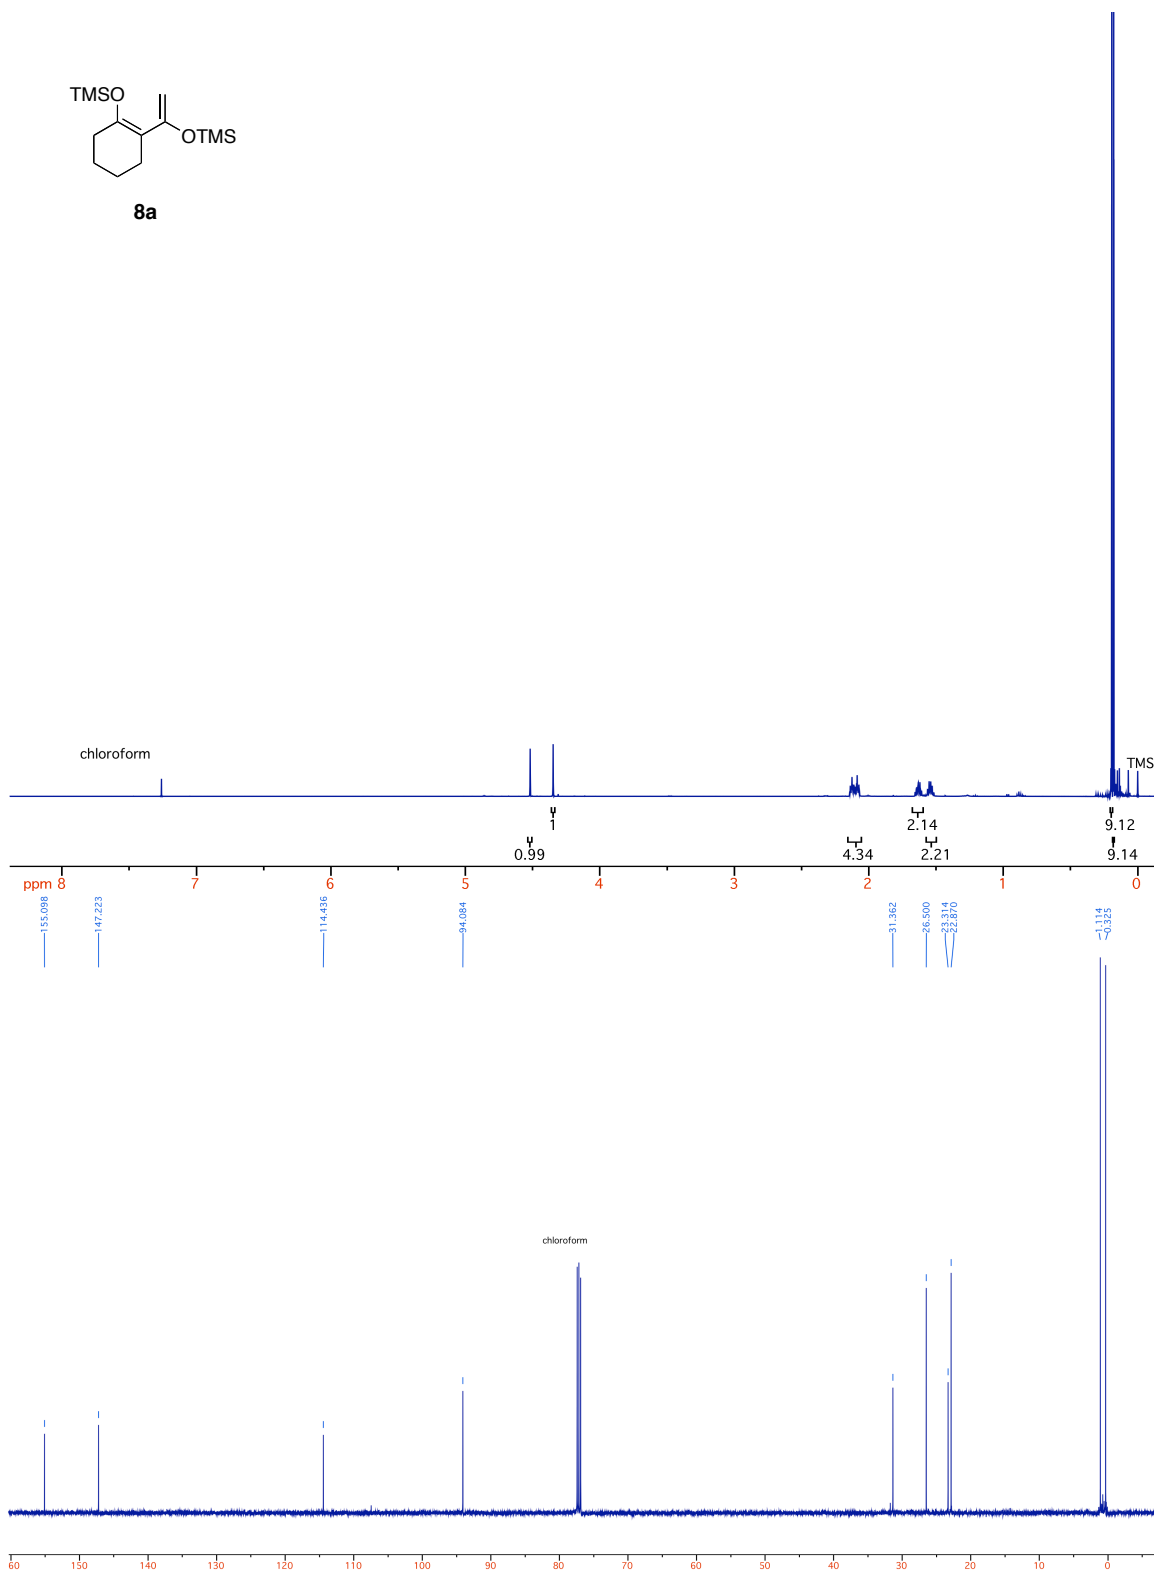

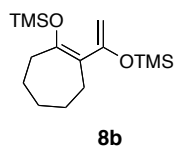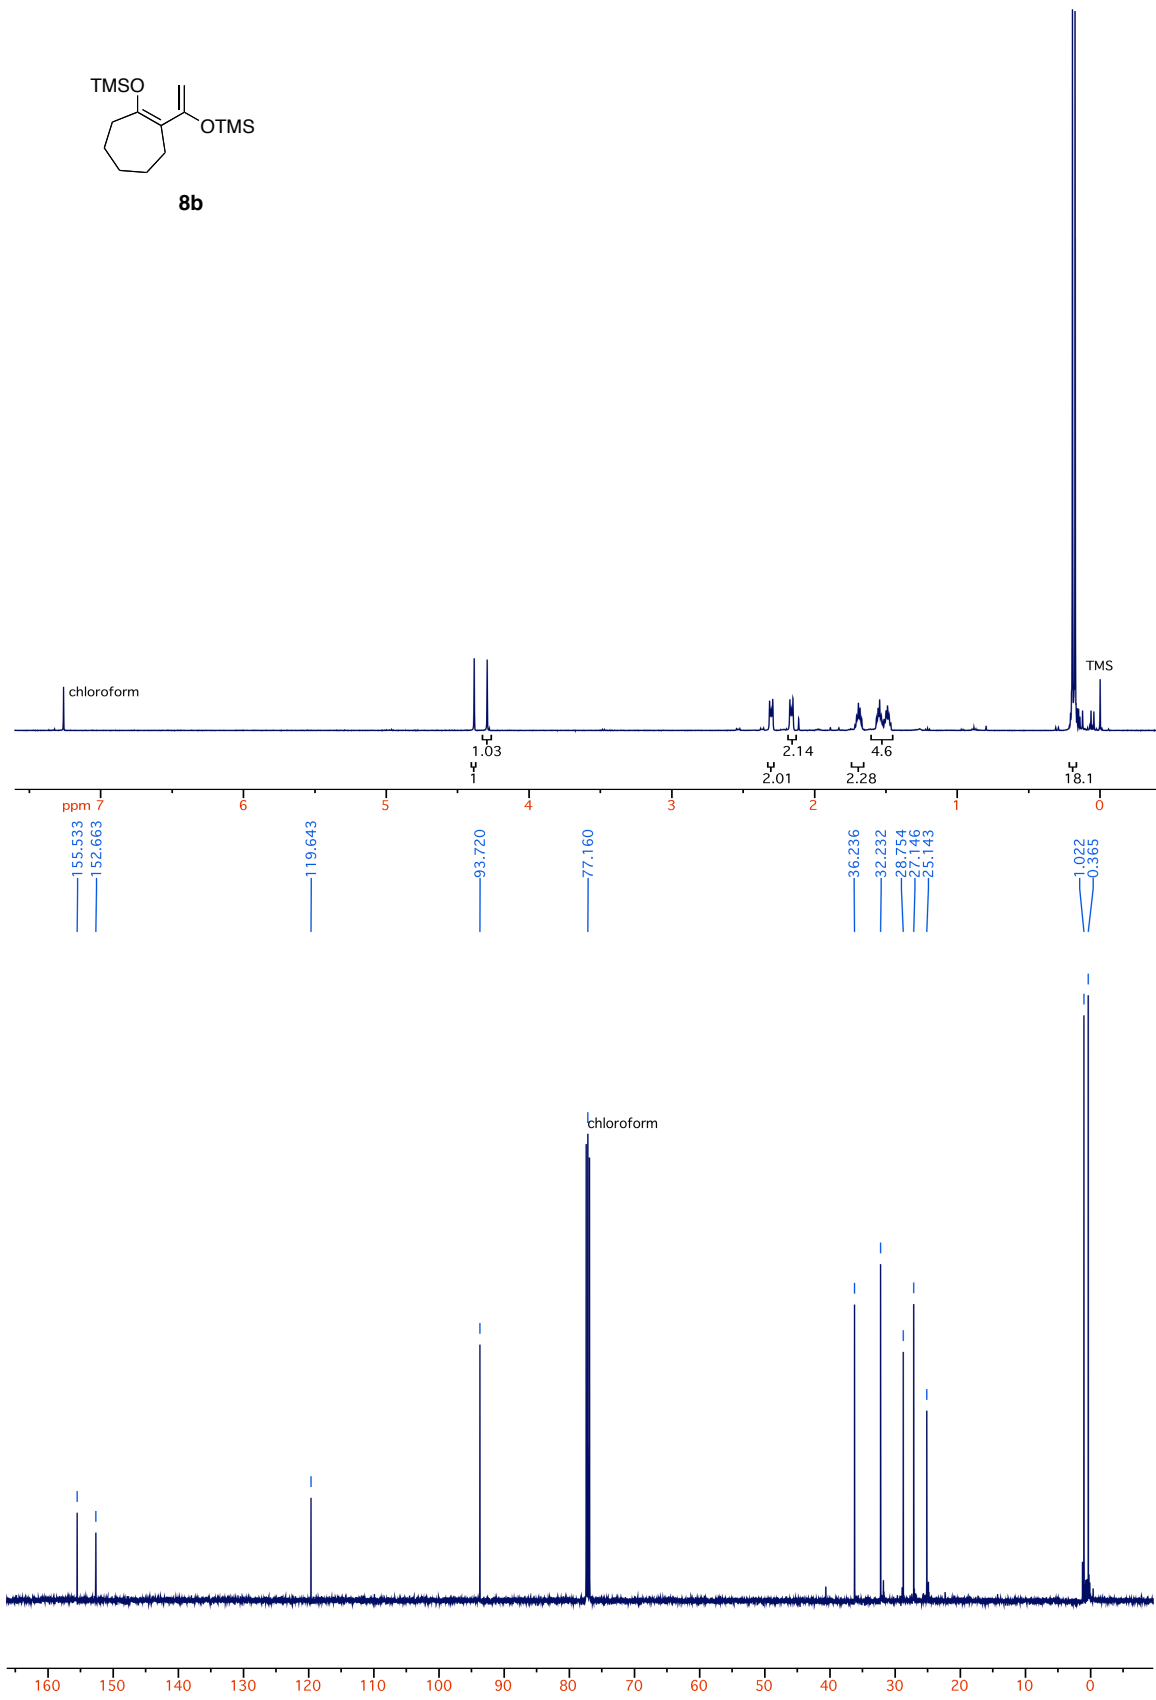

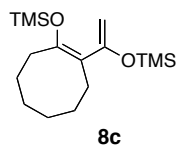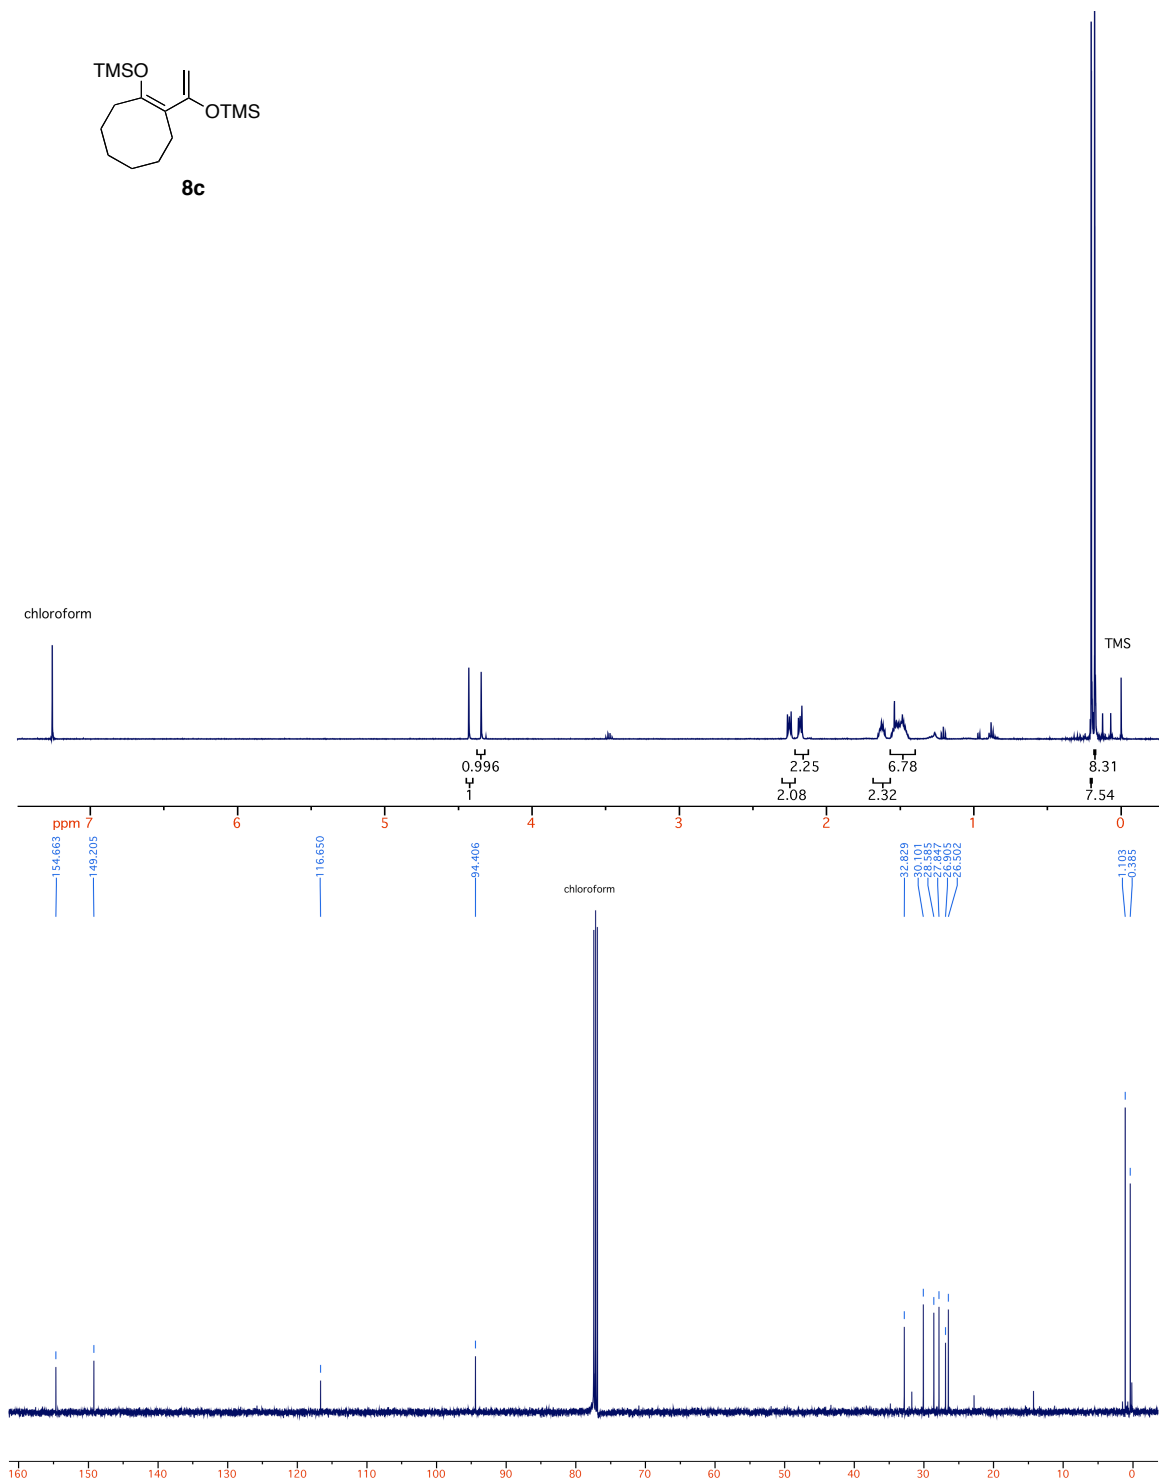

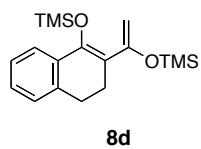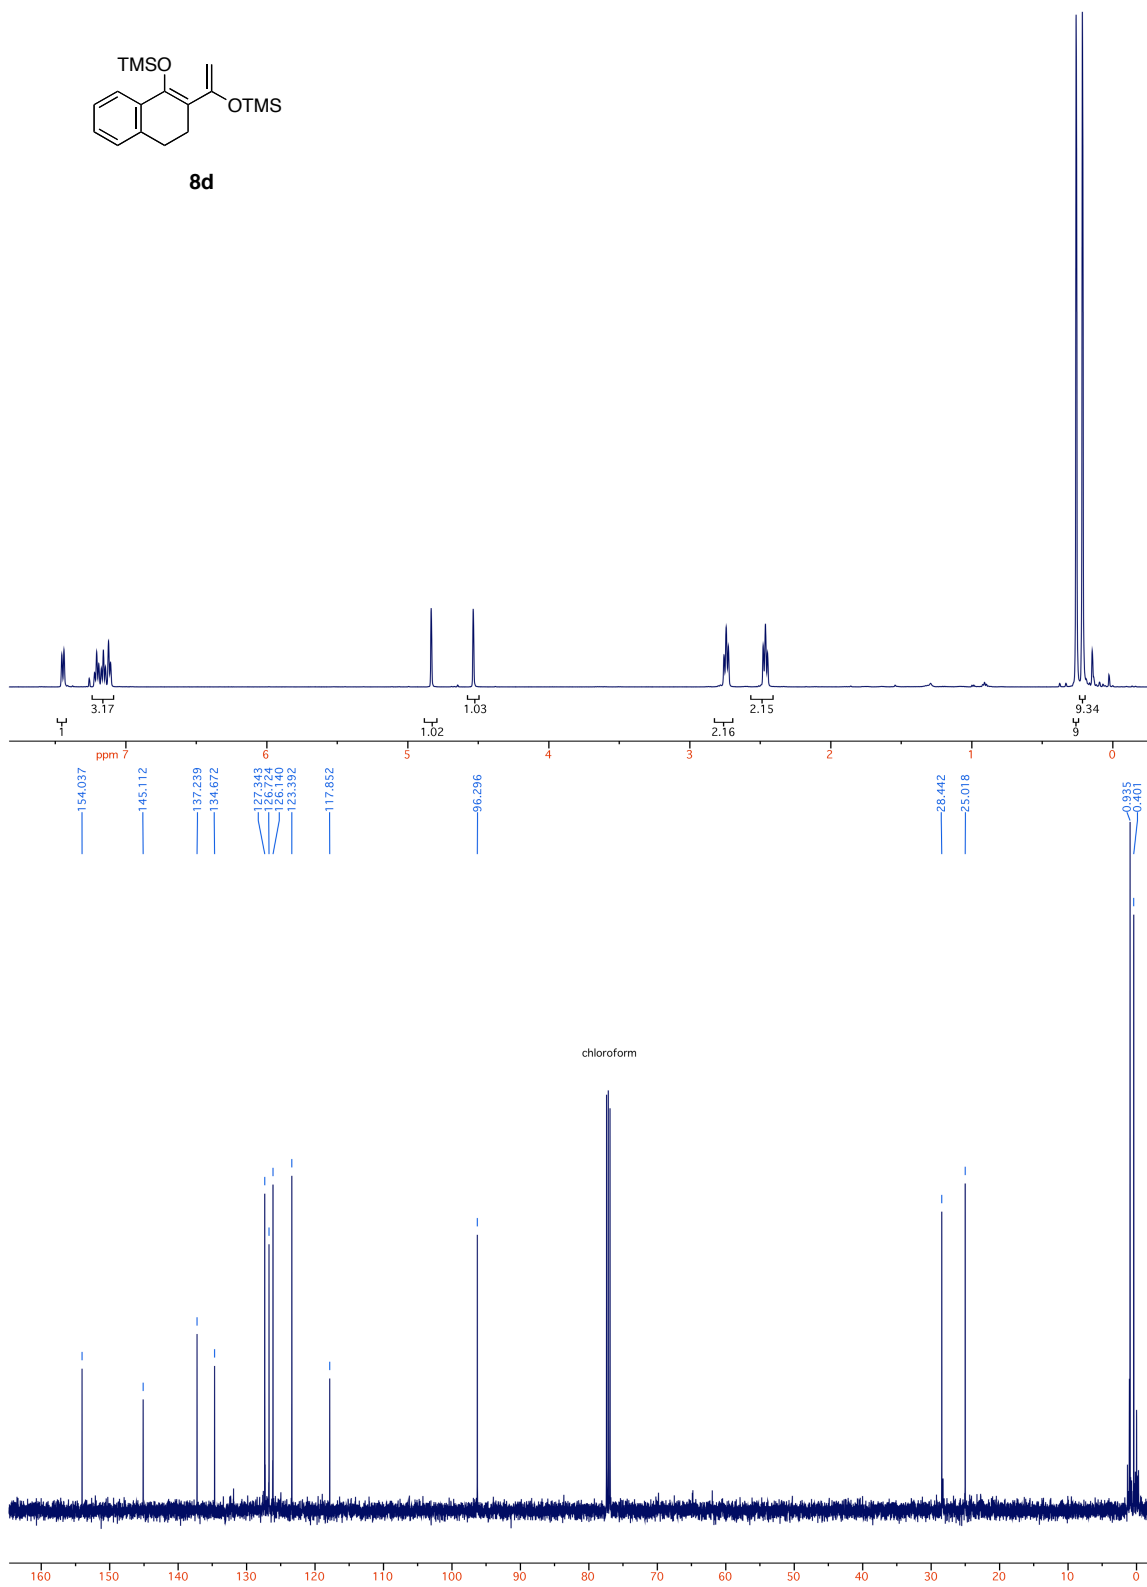

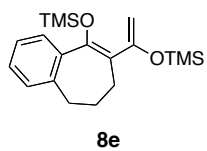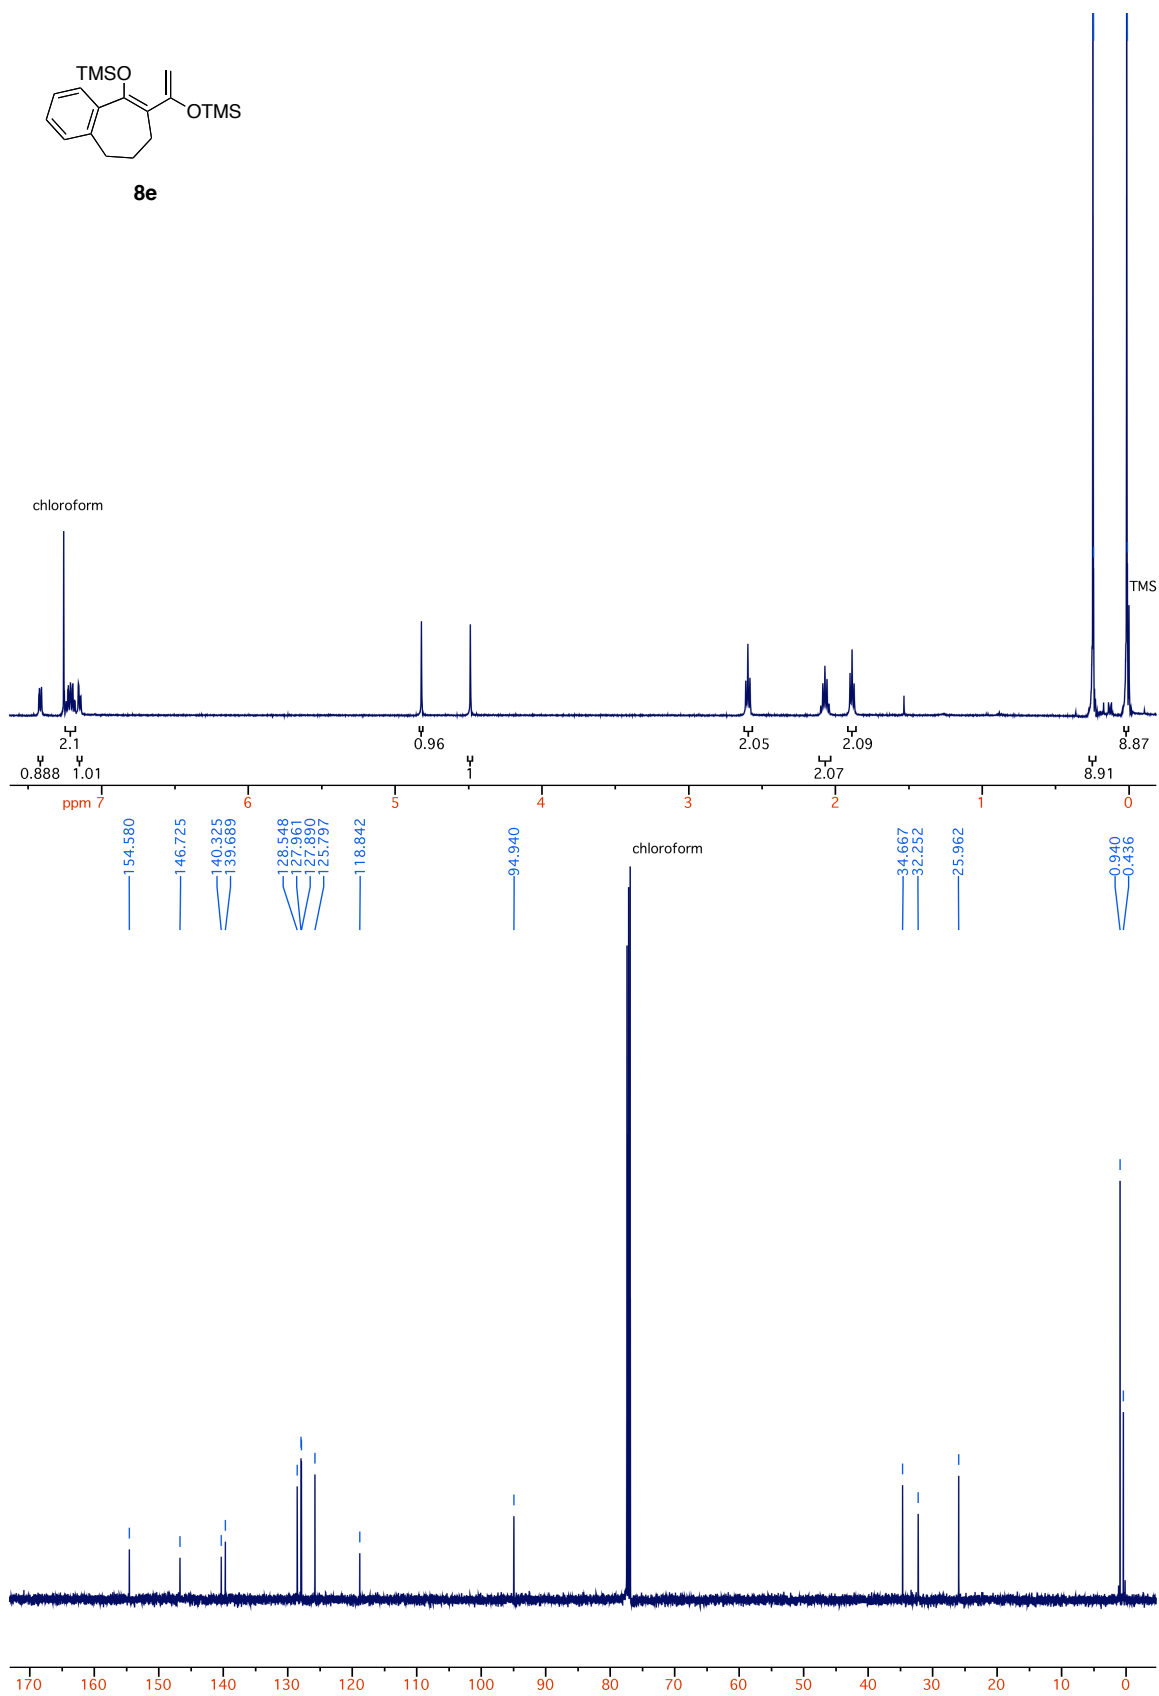

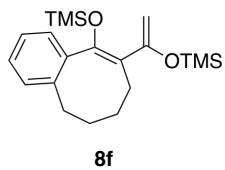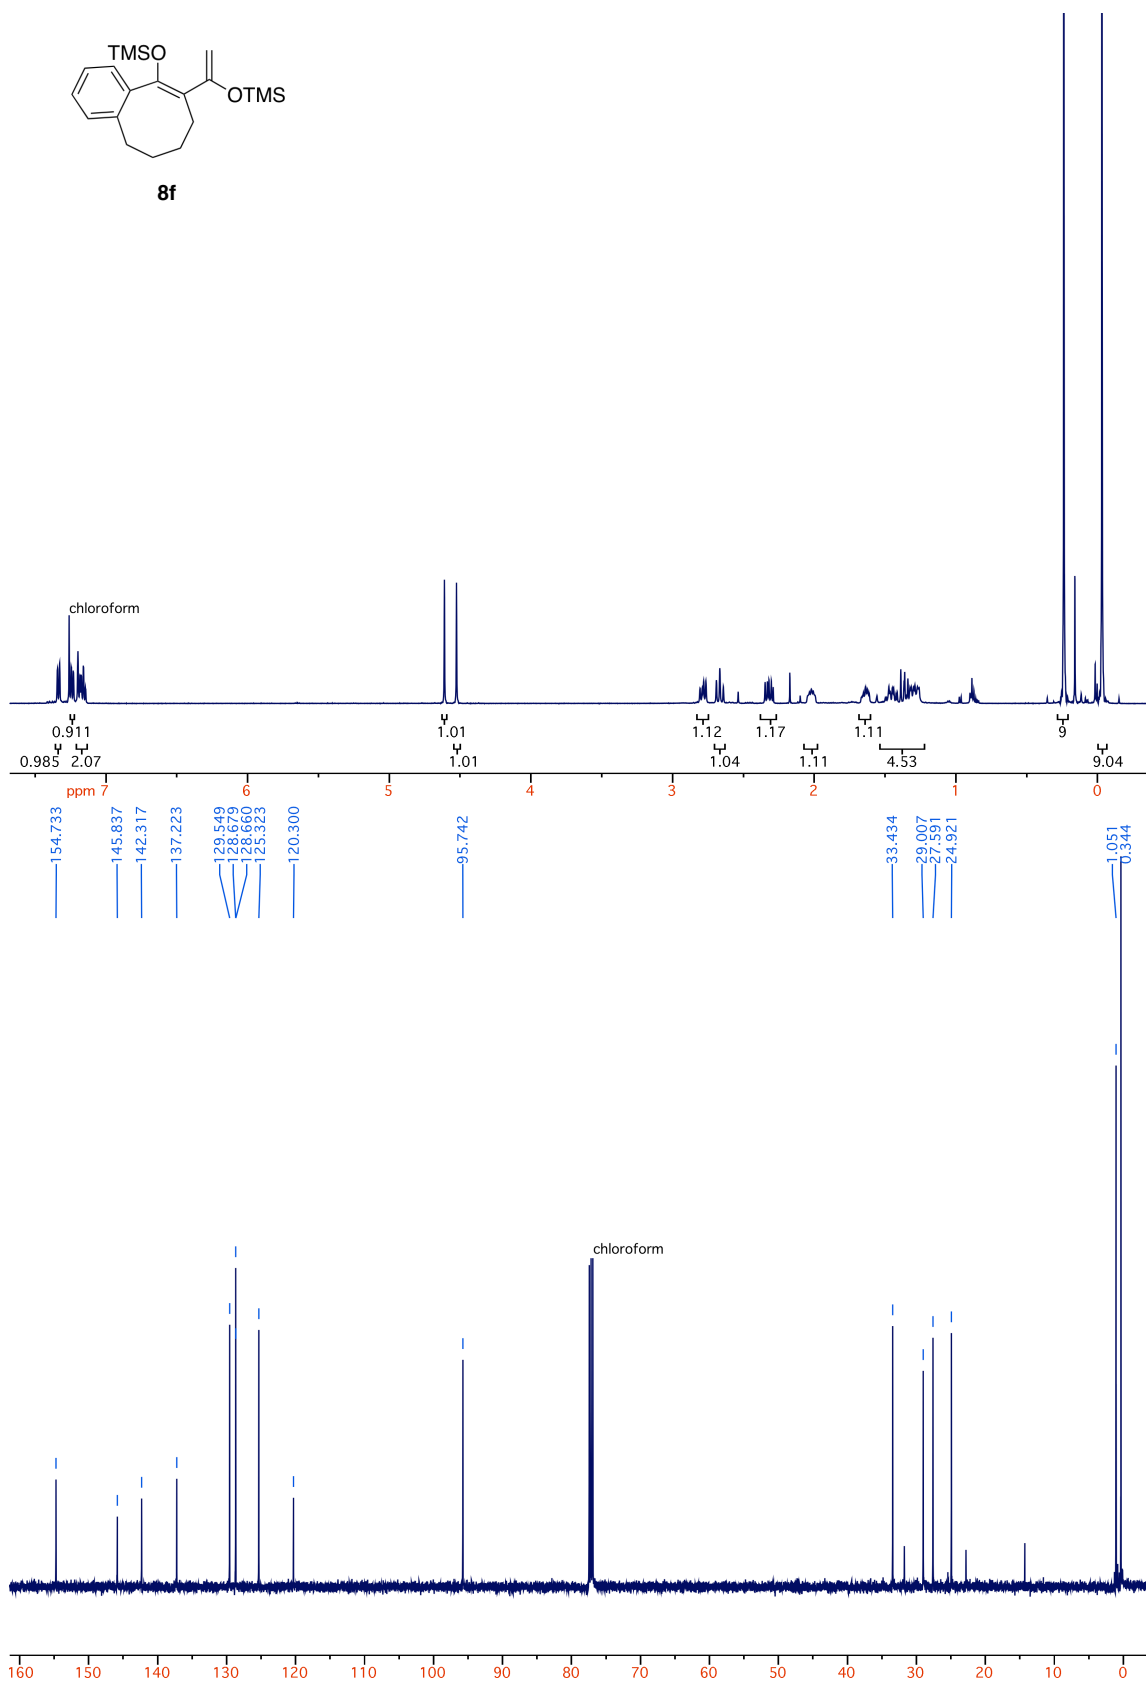

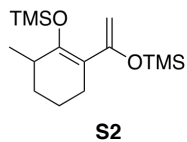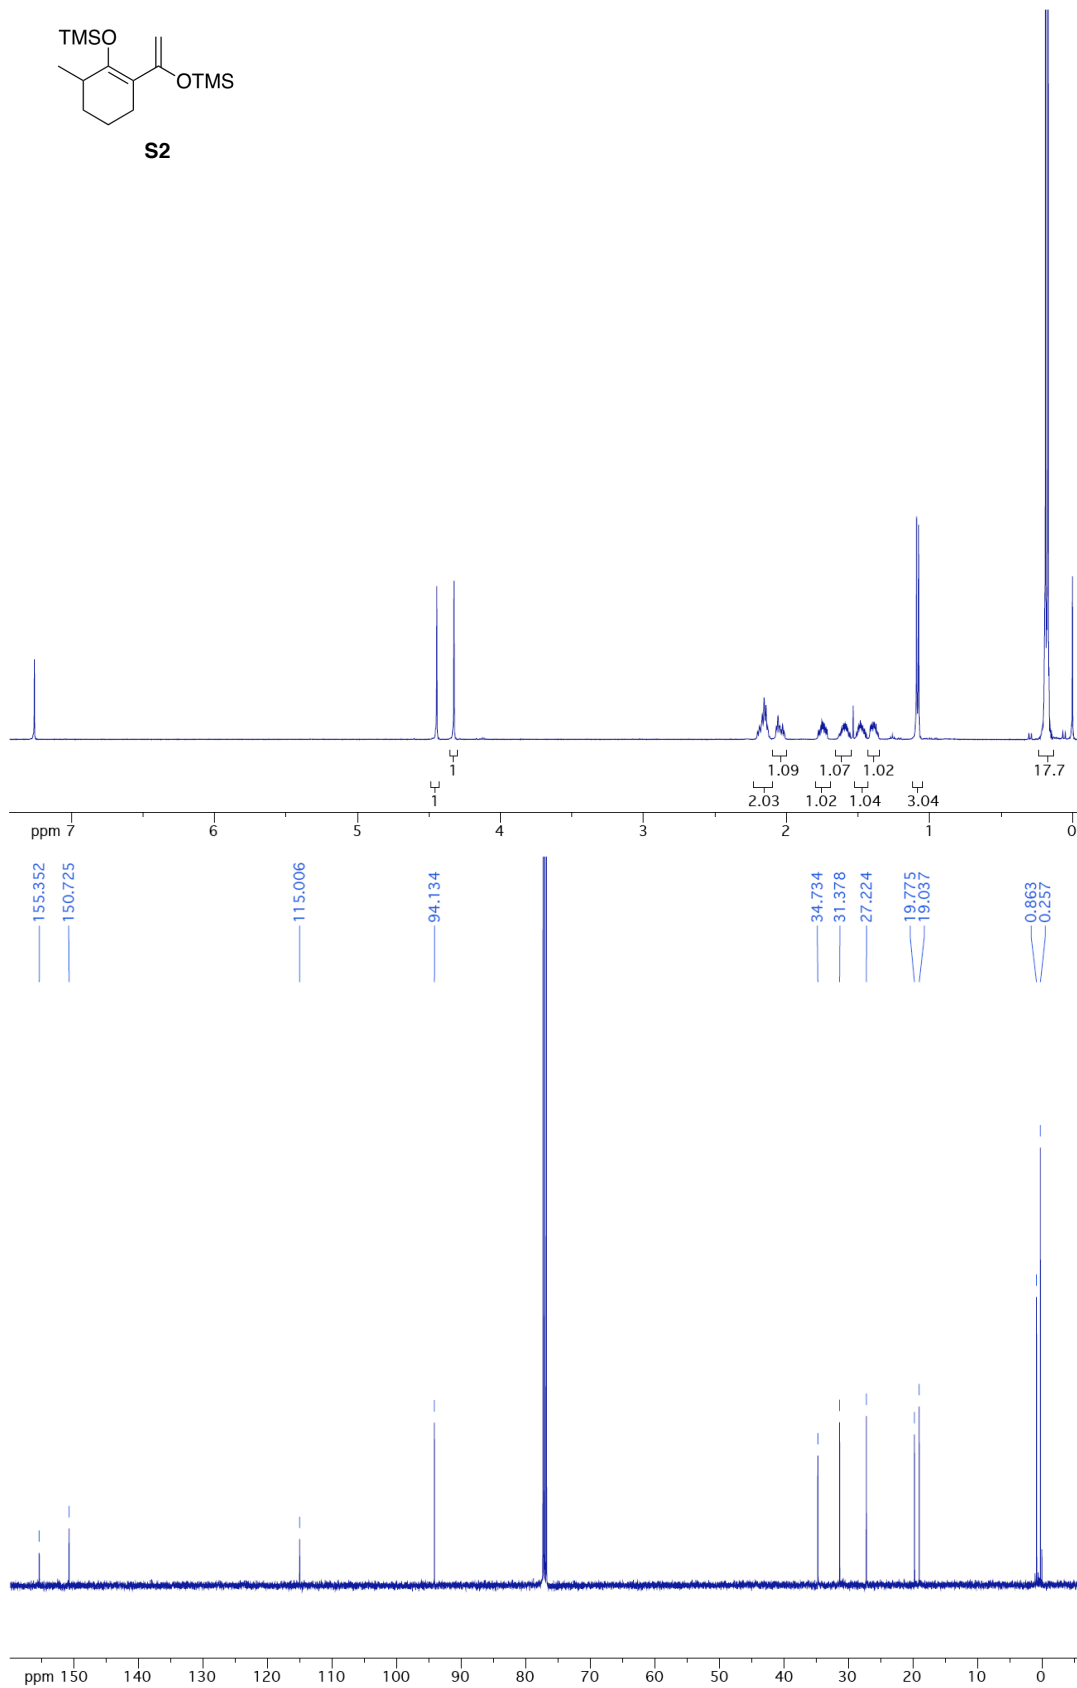

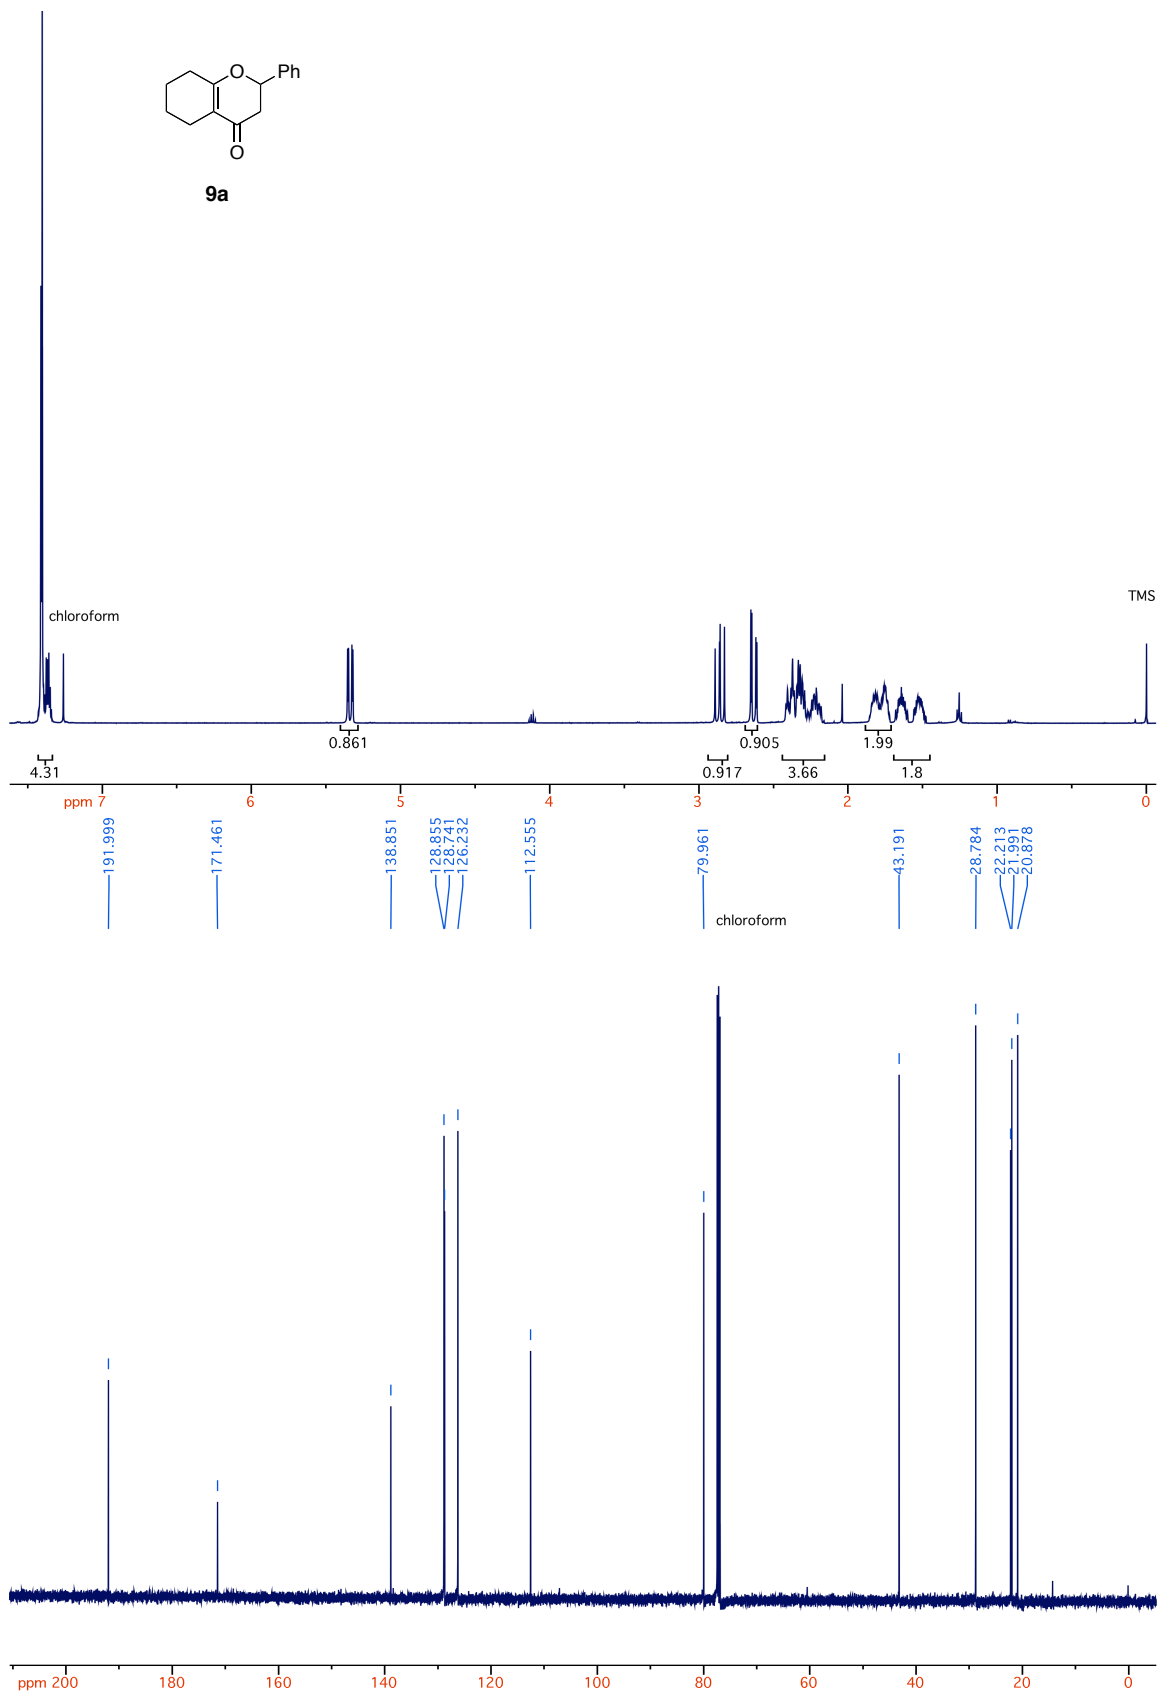



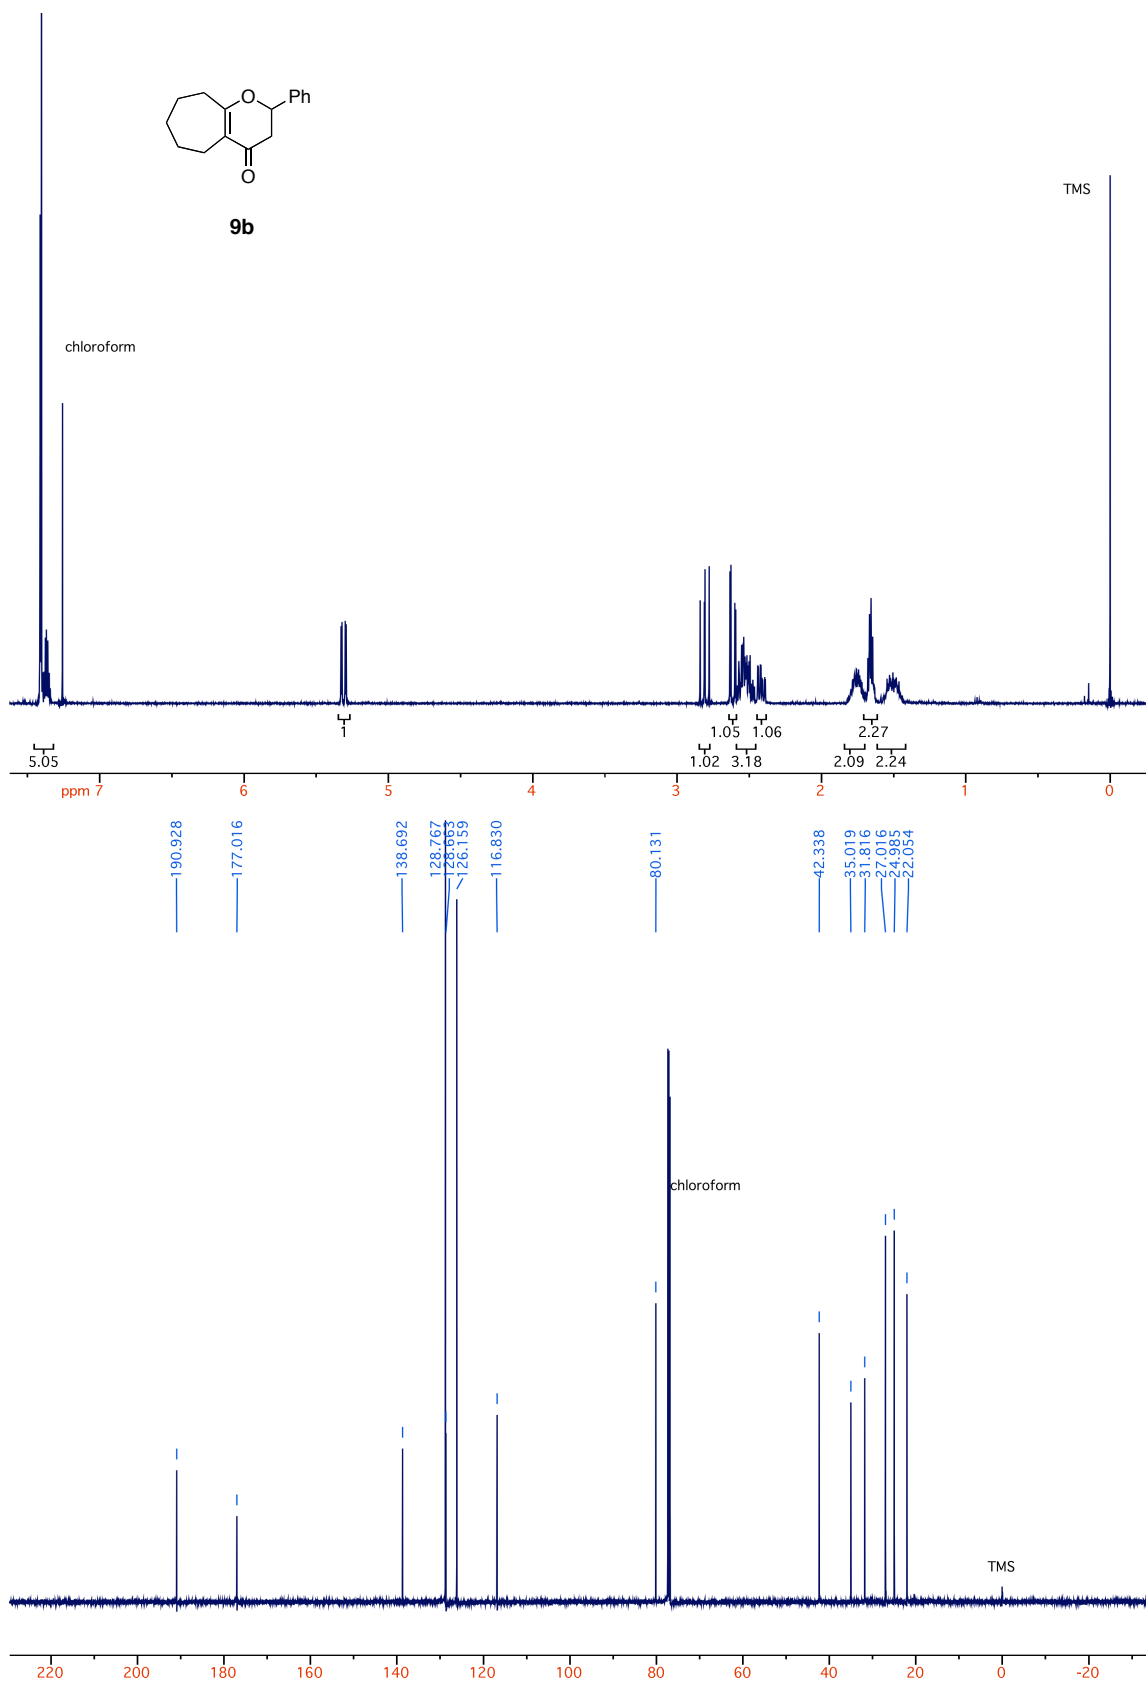

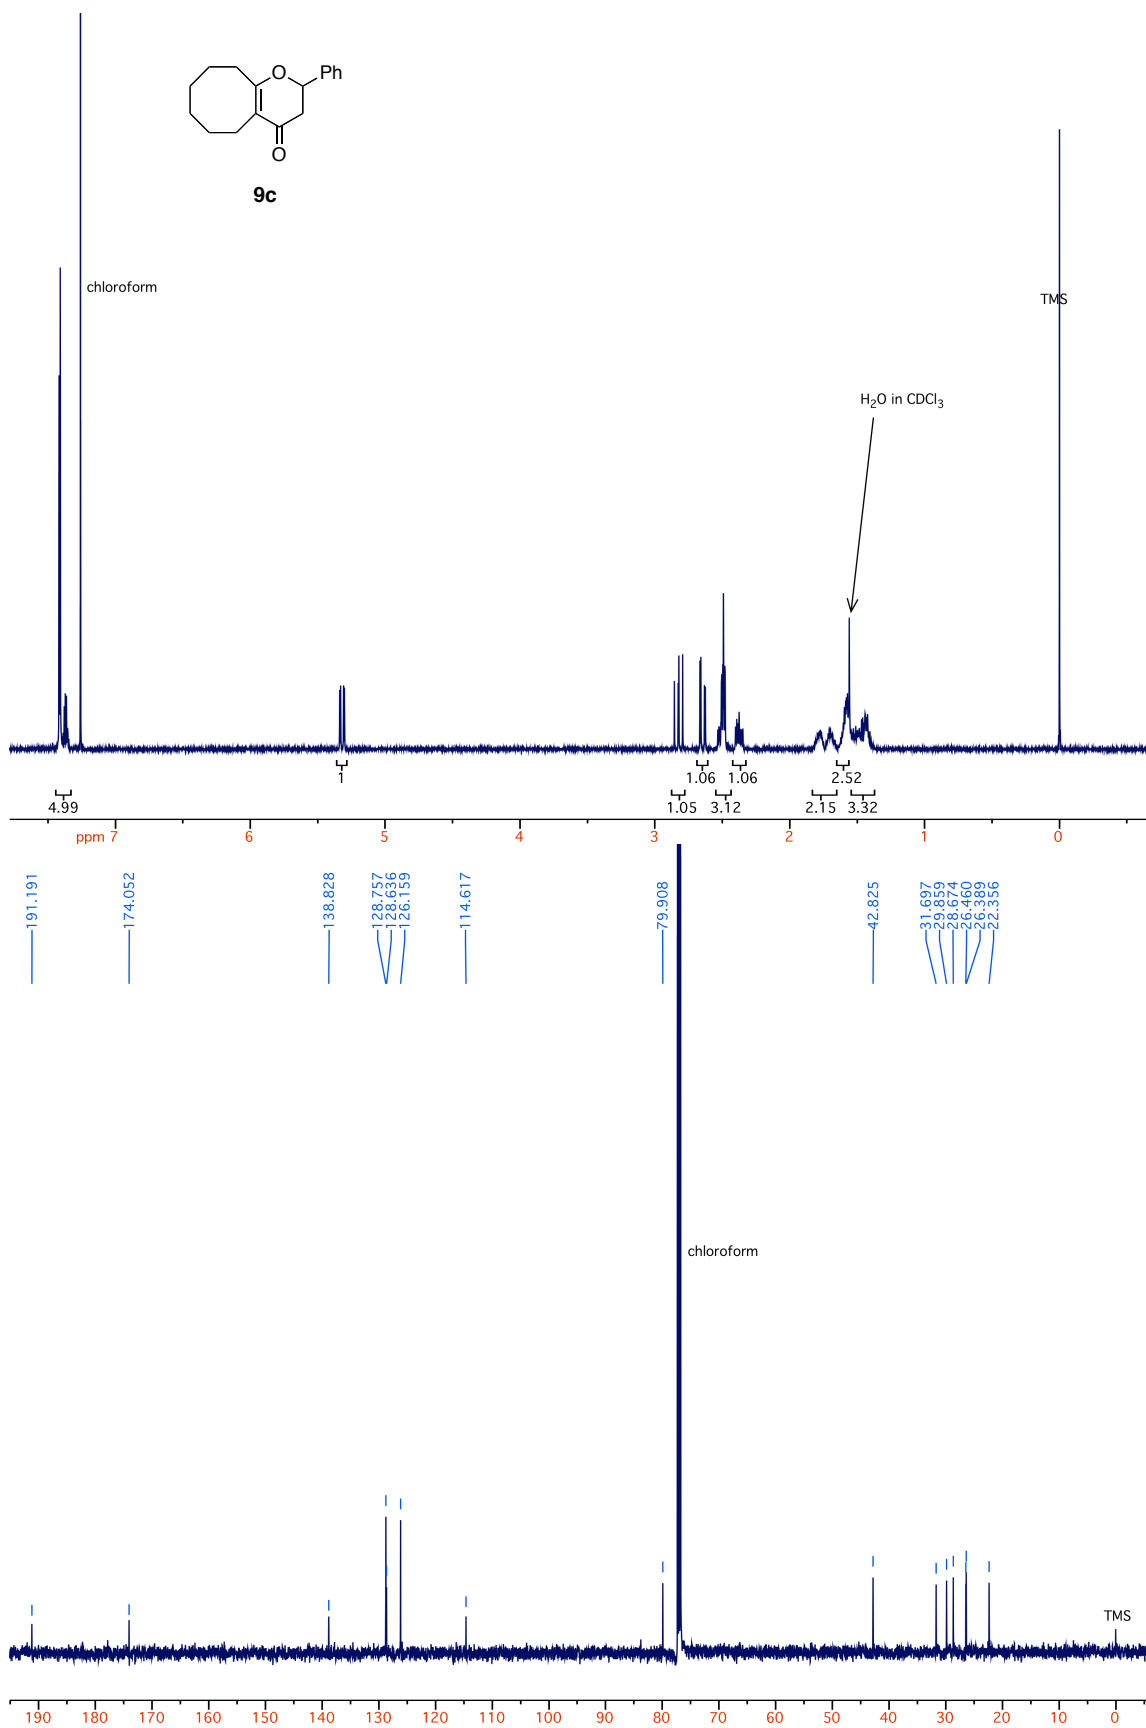

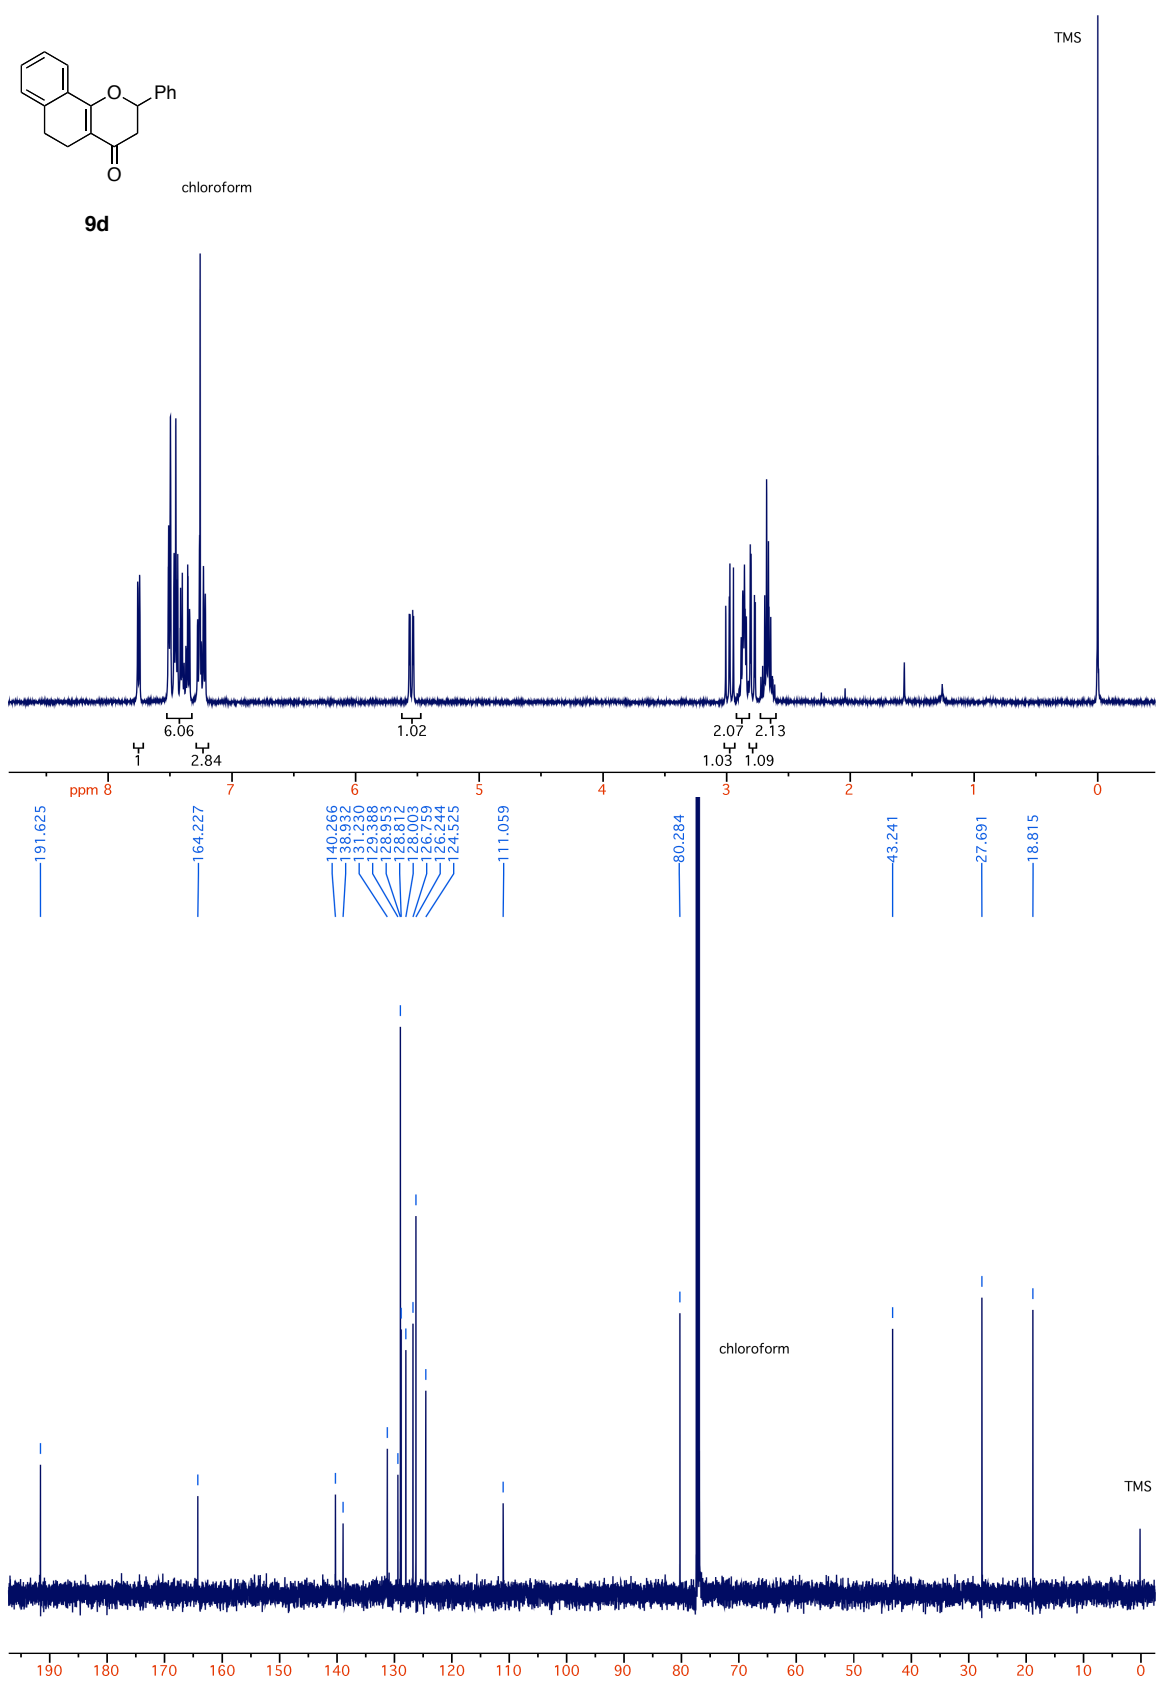

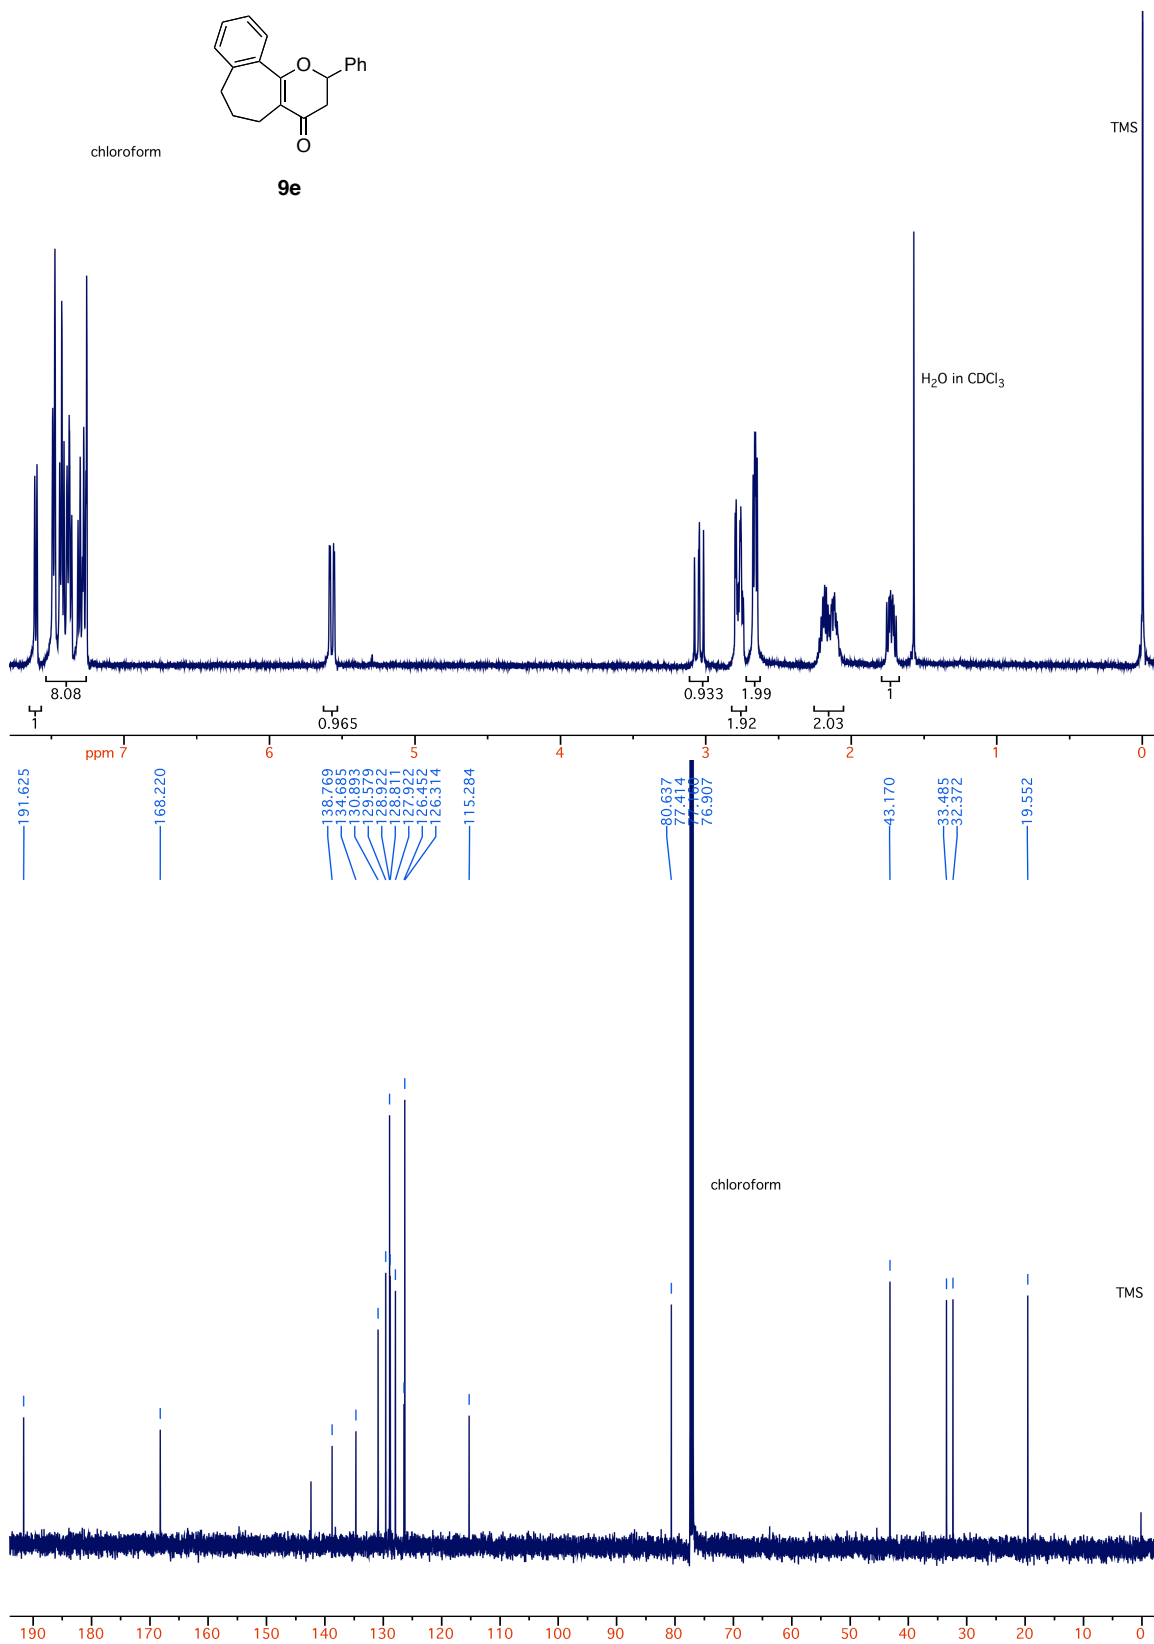

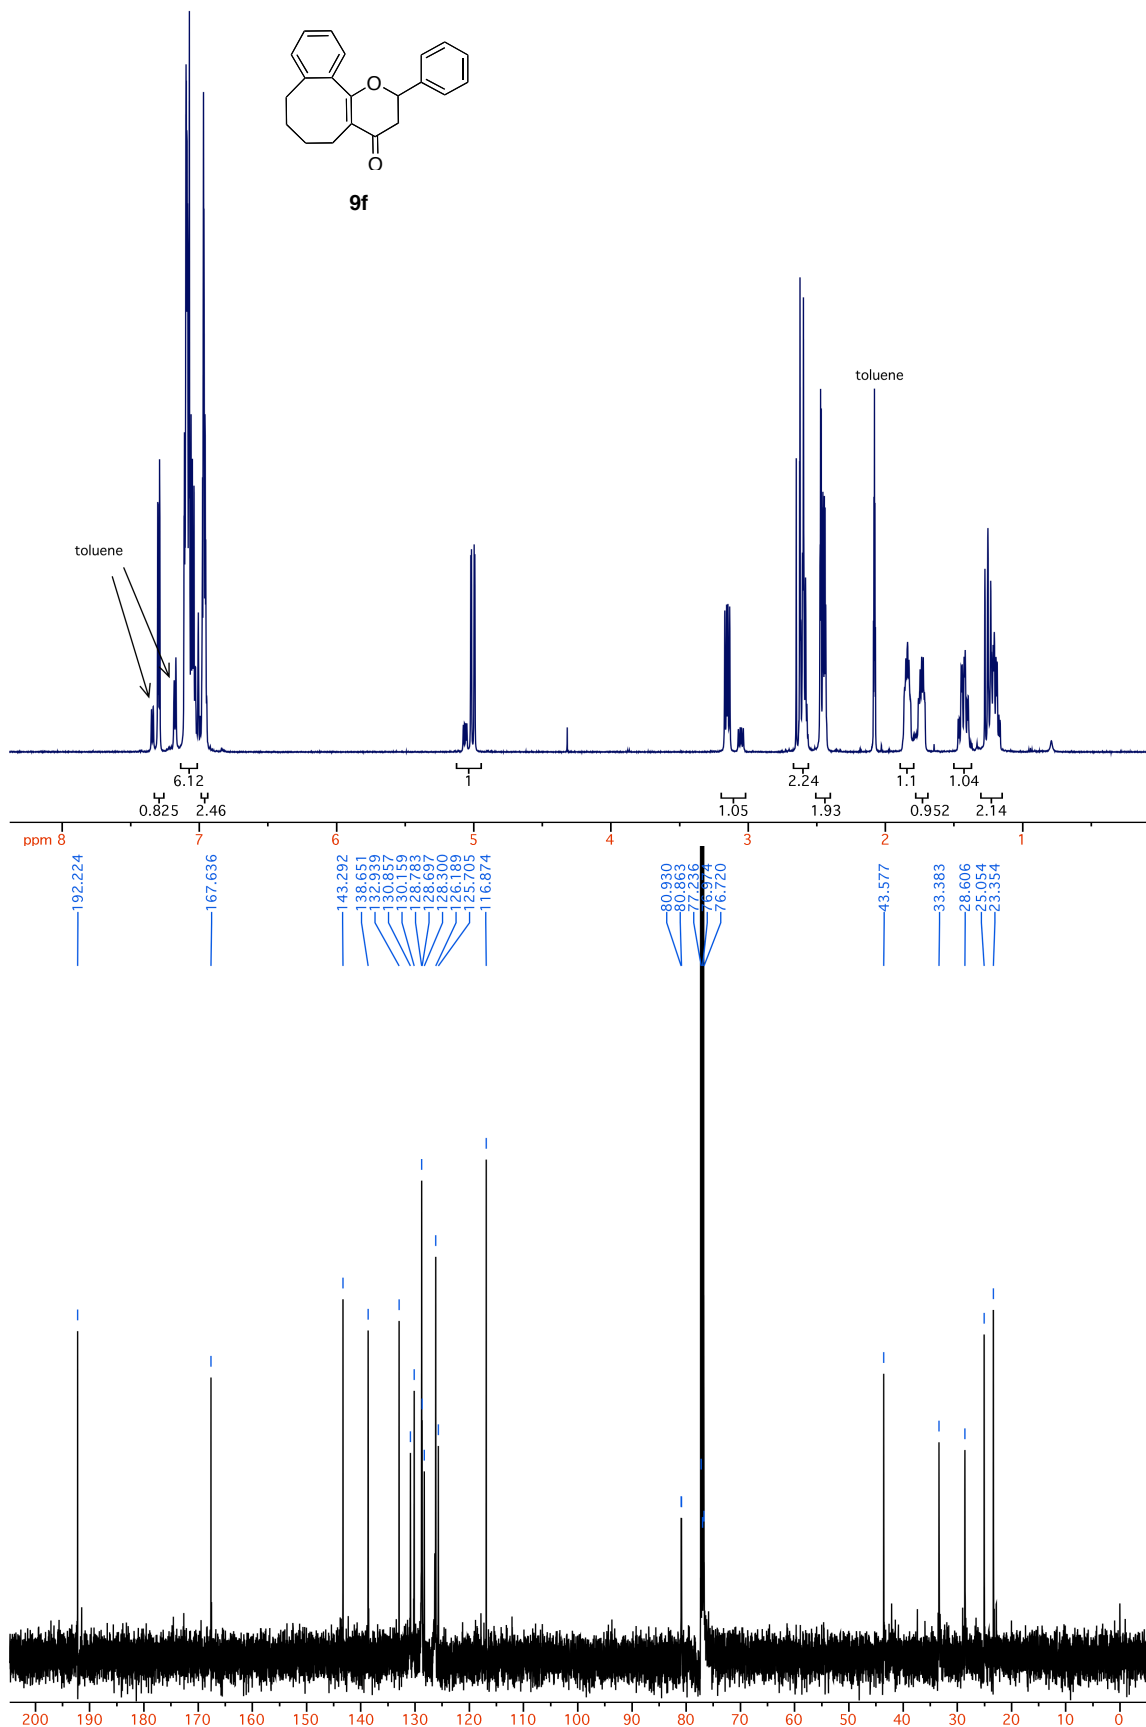

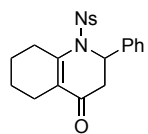**10a**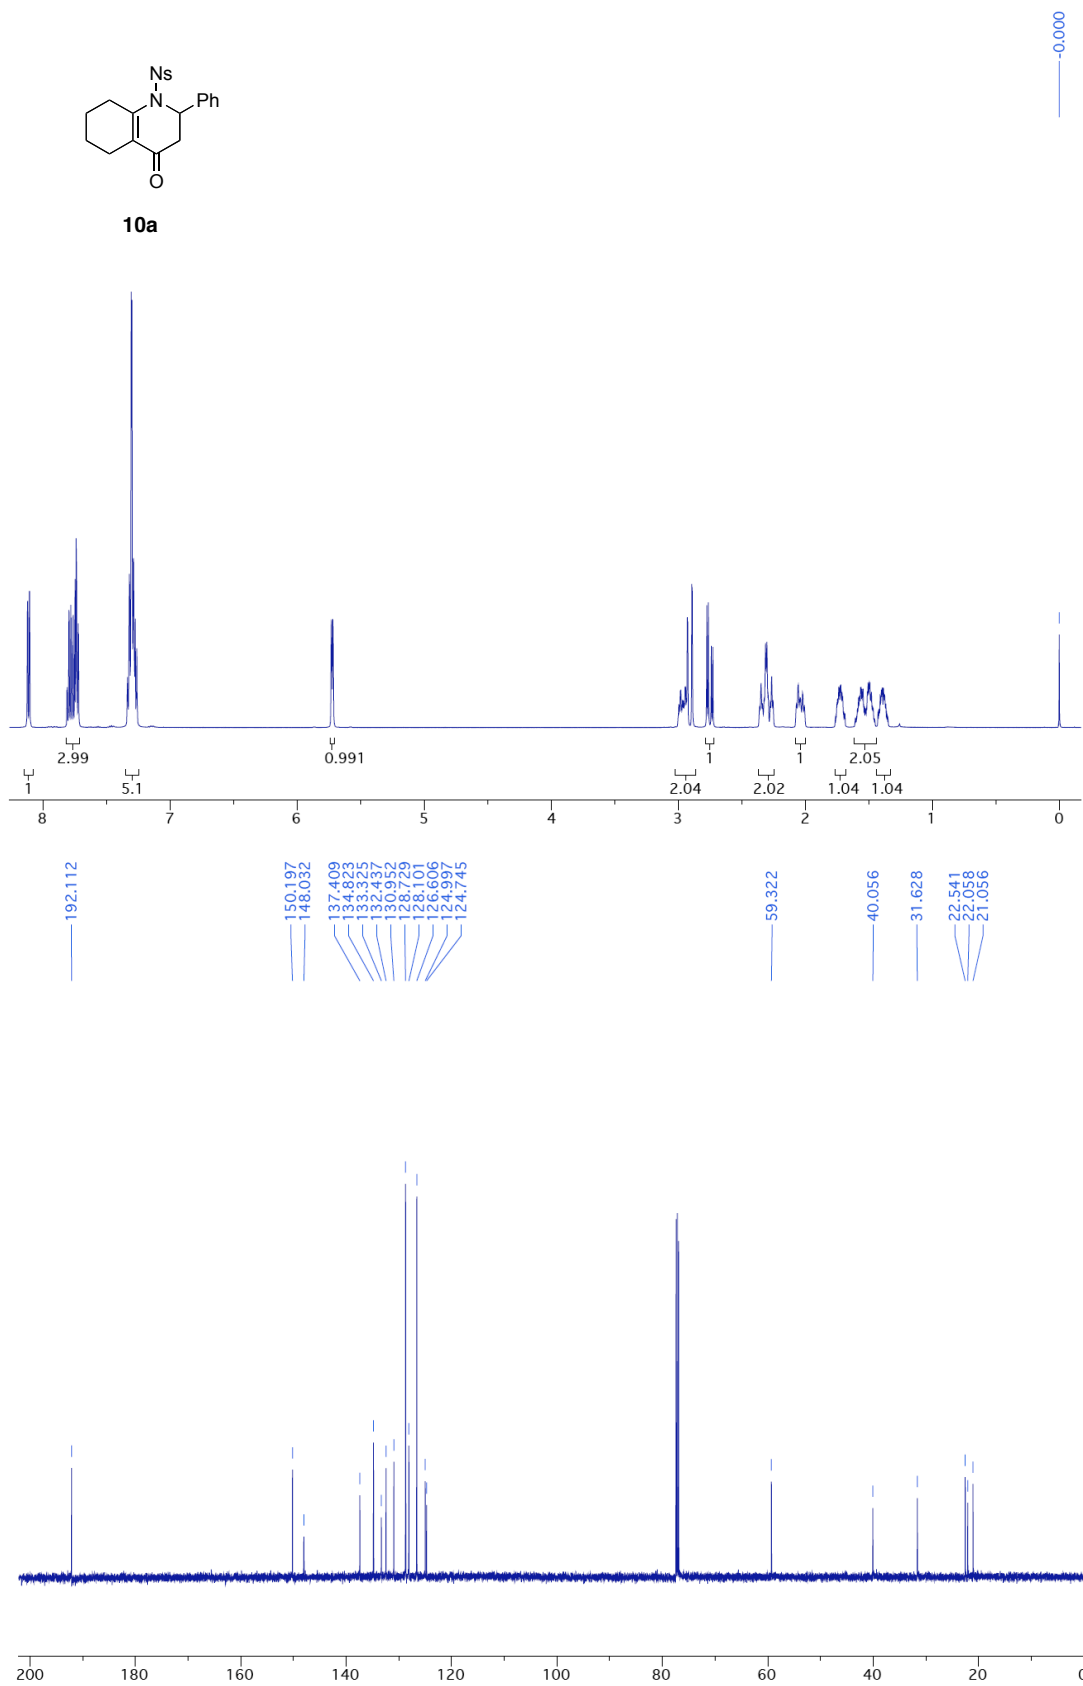

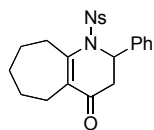**10b**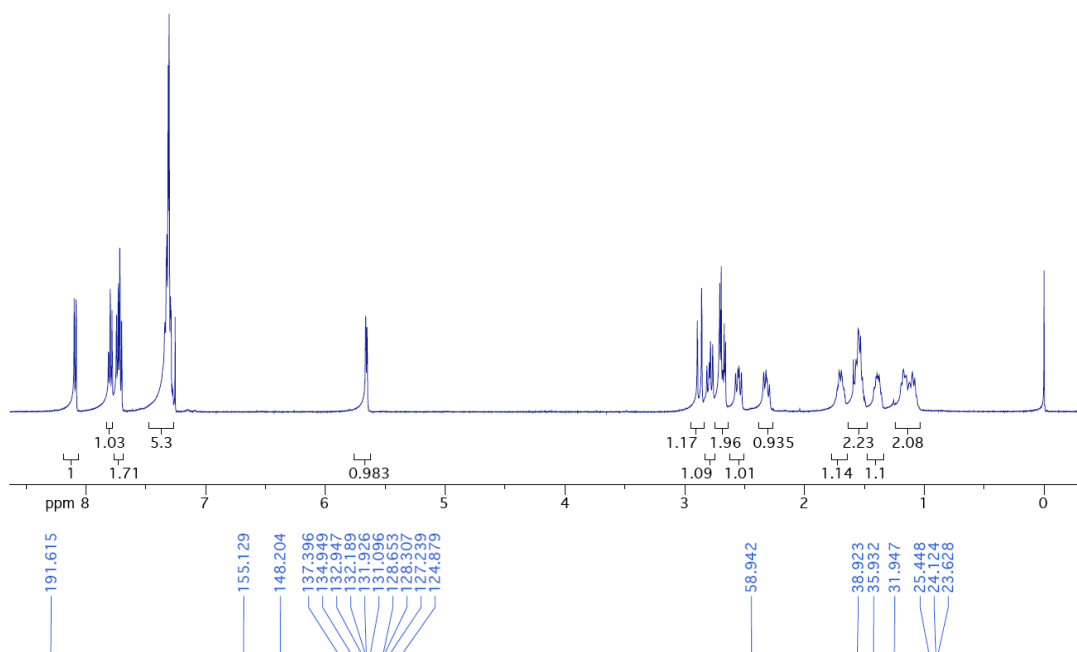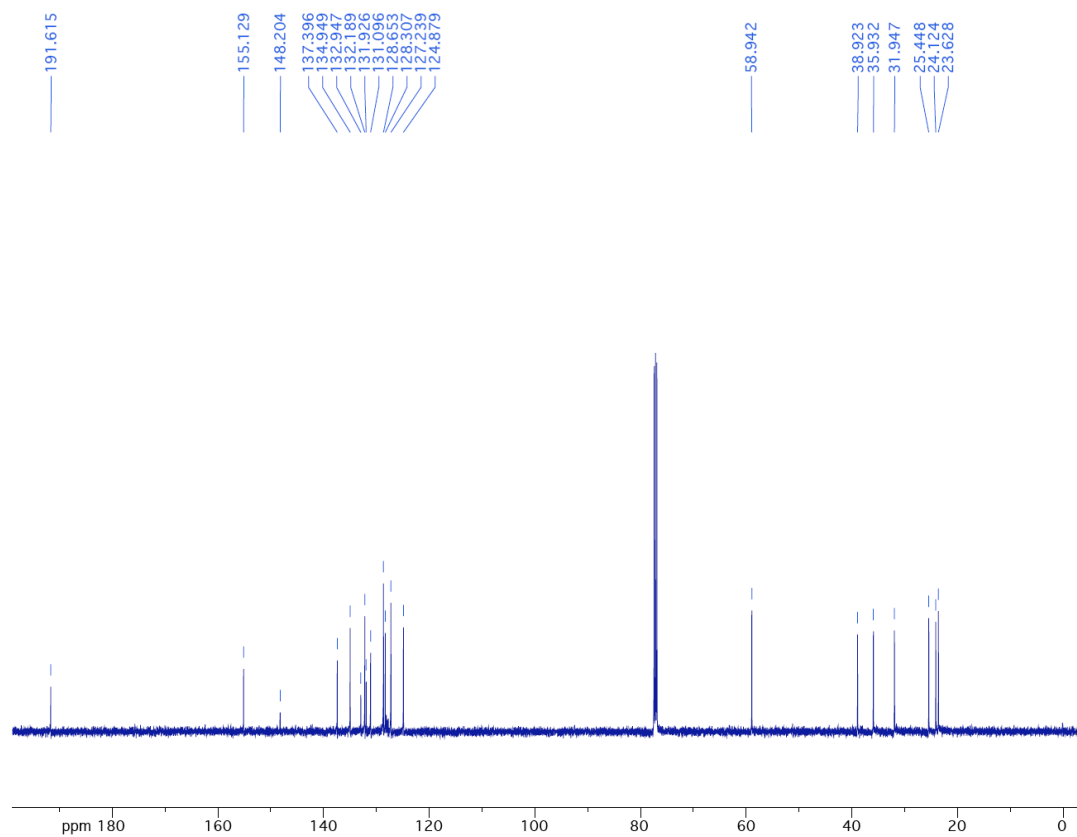

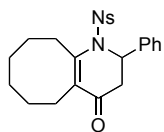**10c**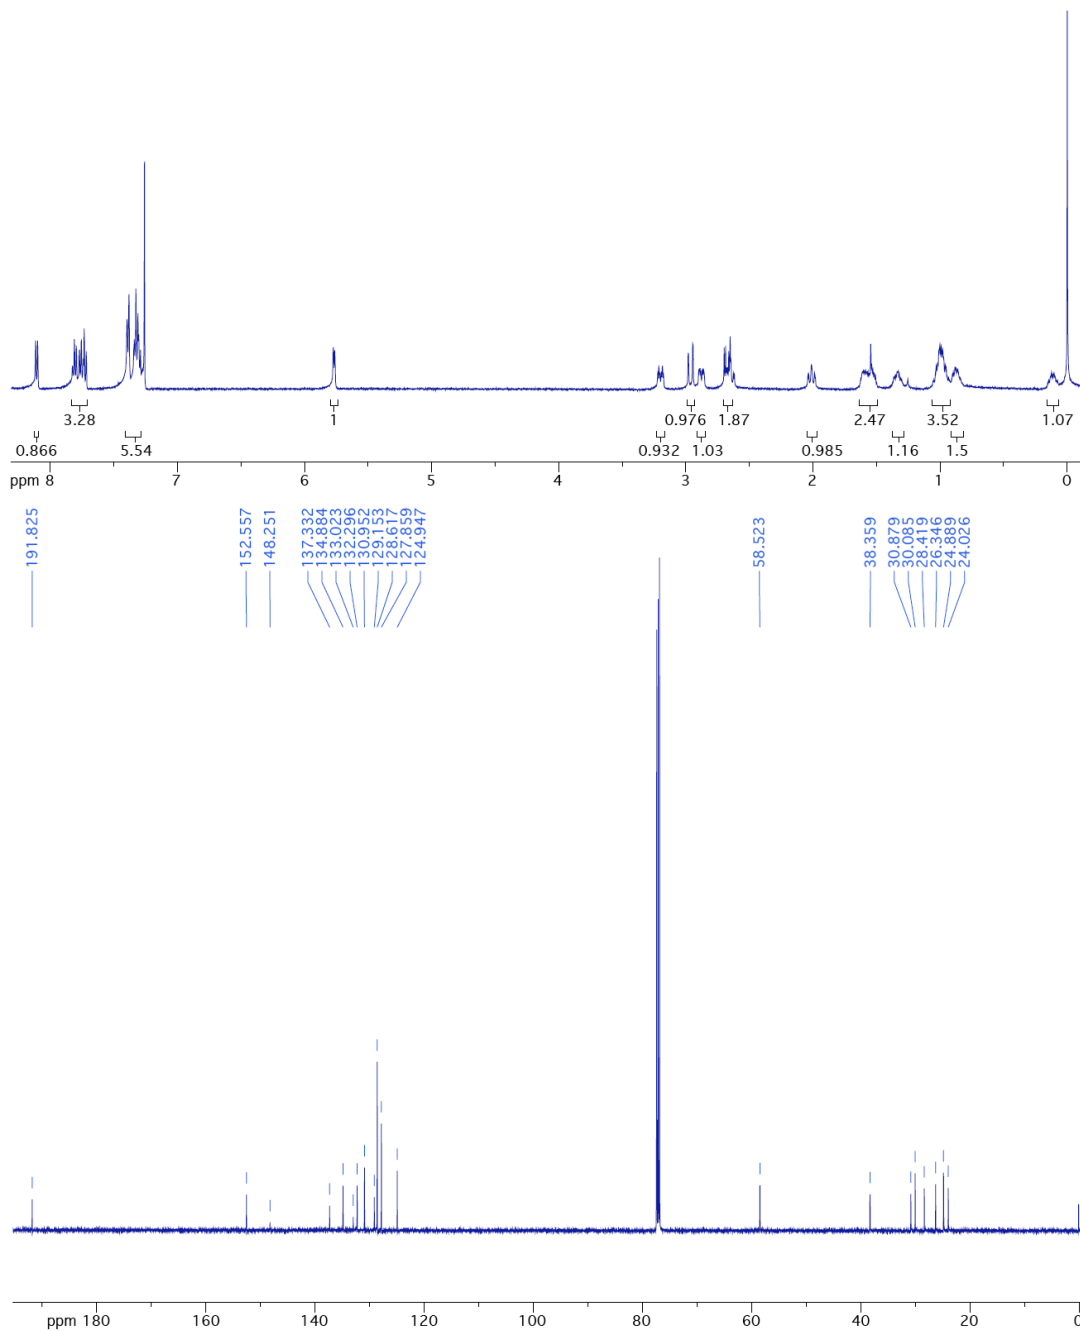



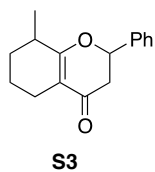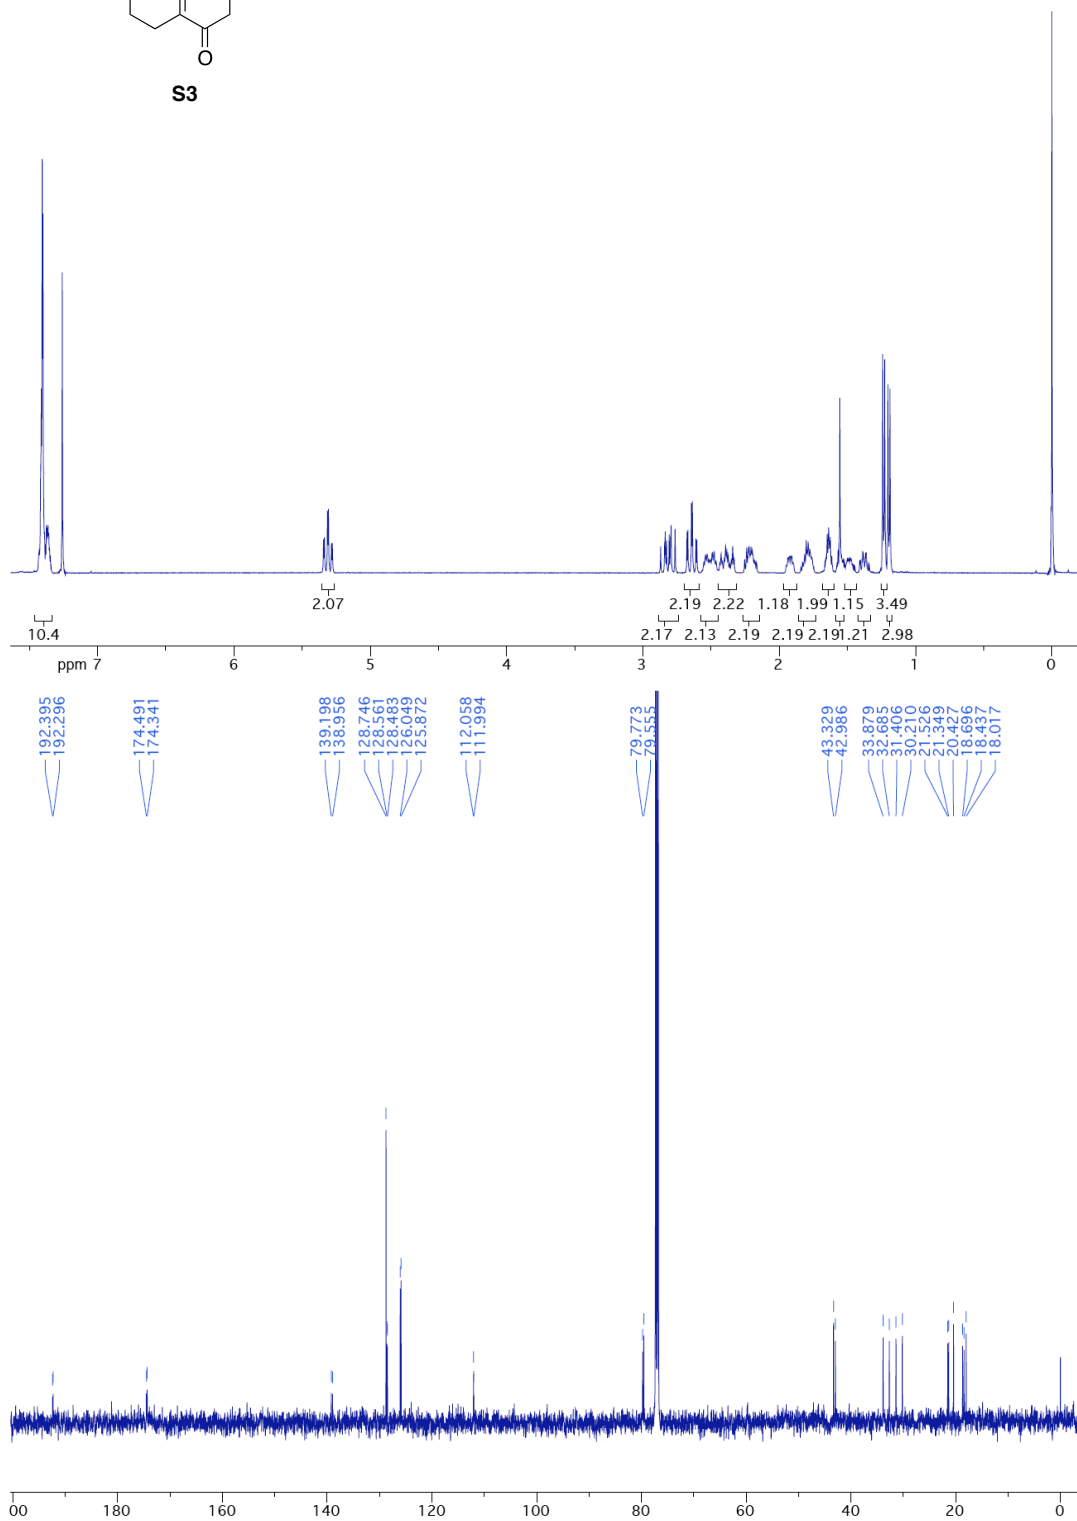



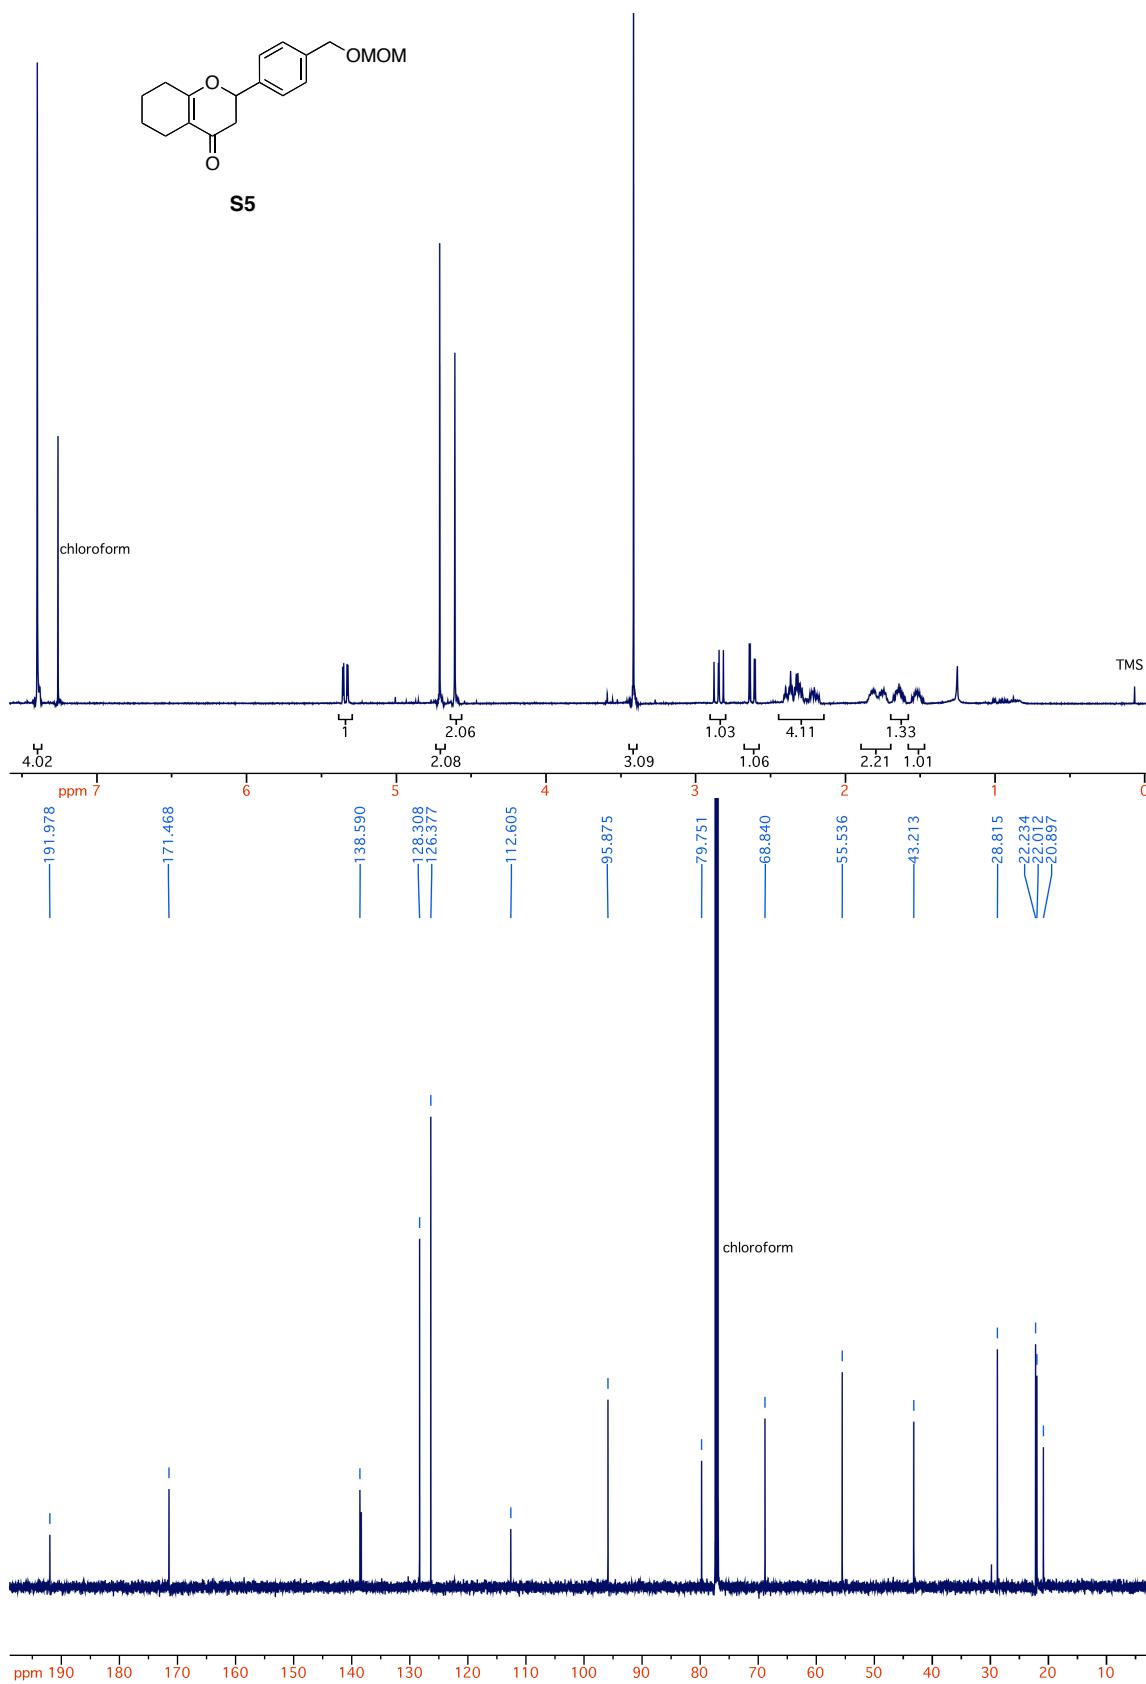

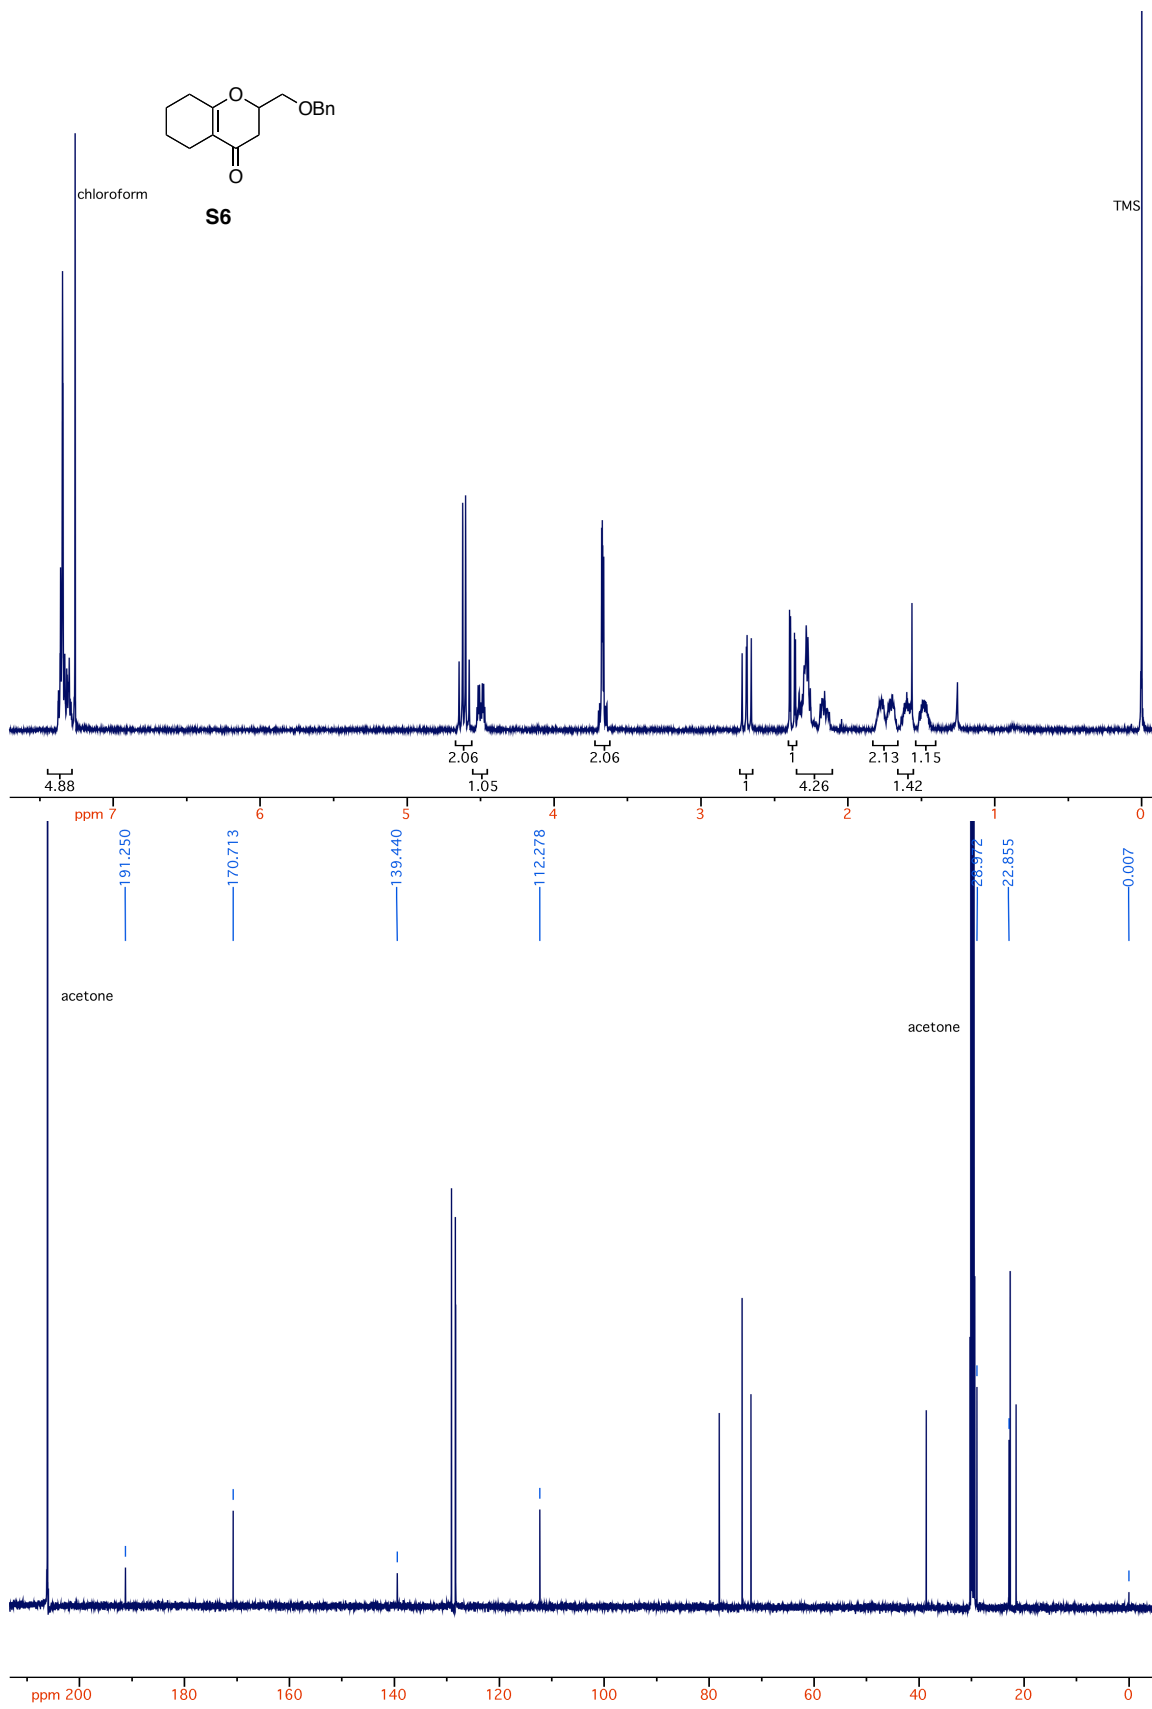

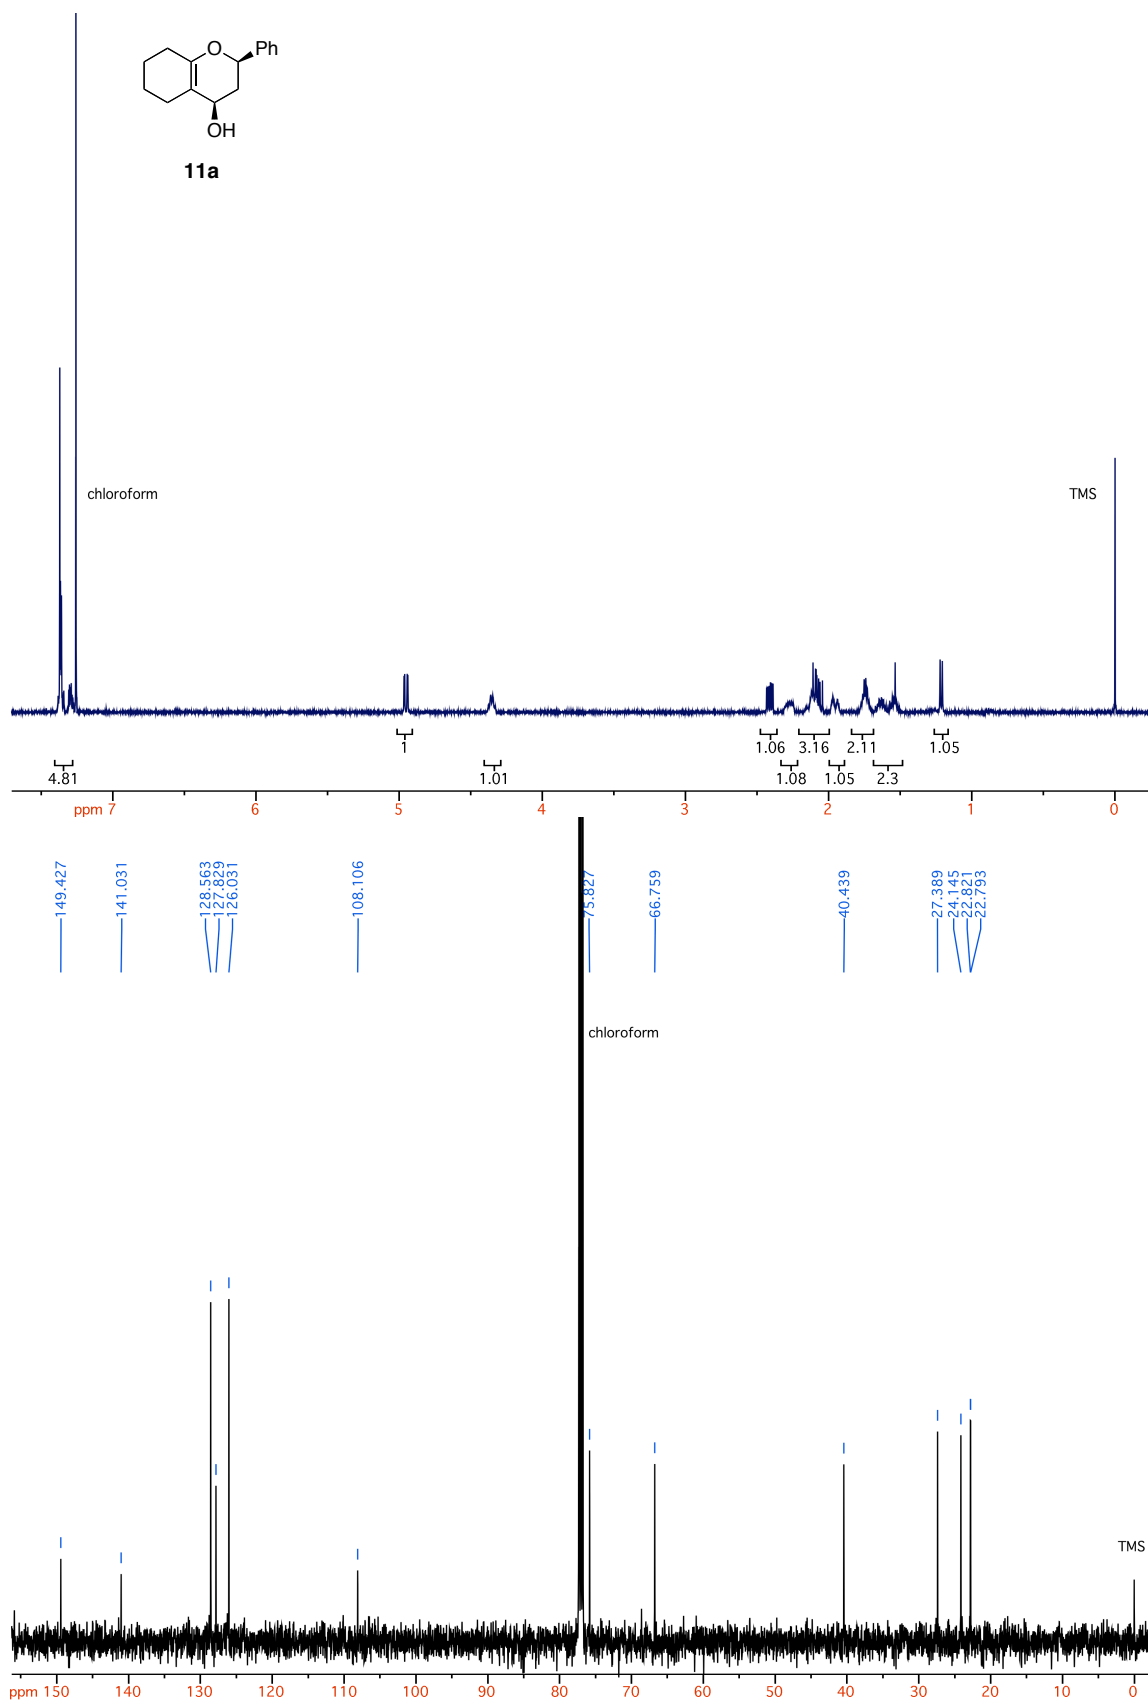

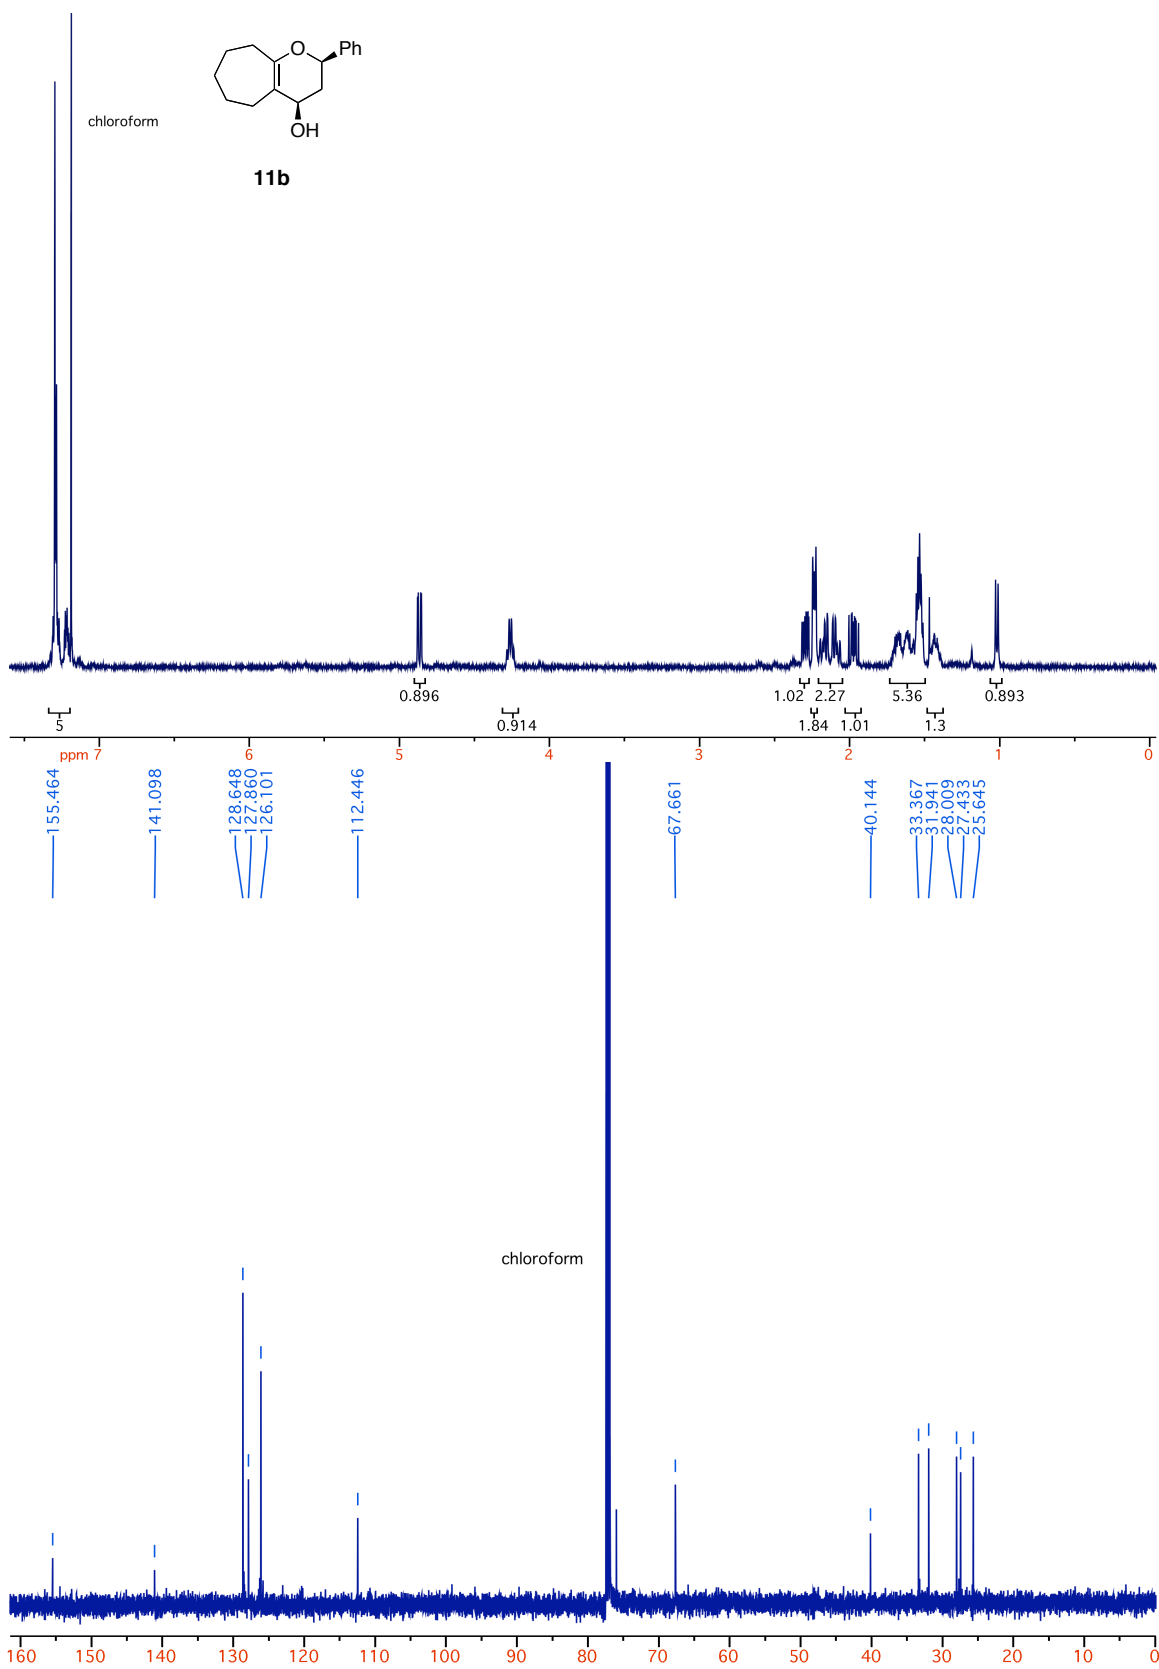

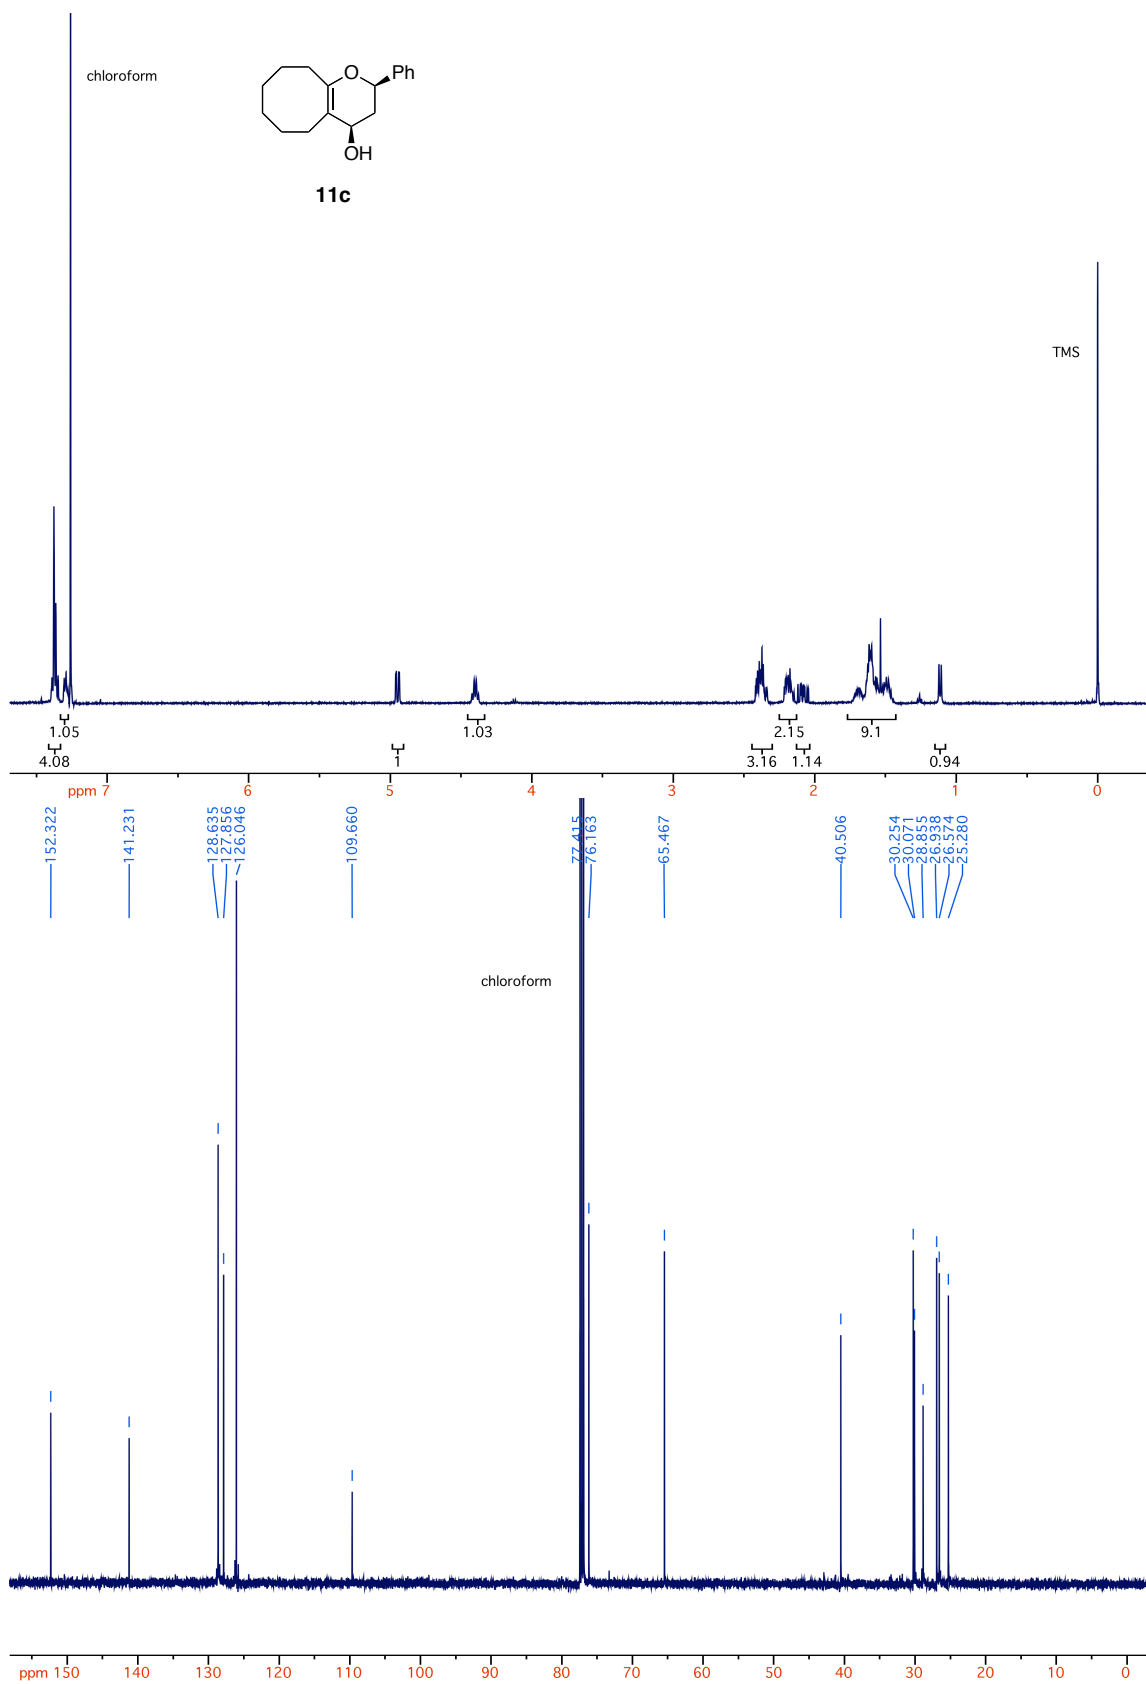

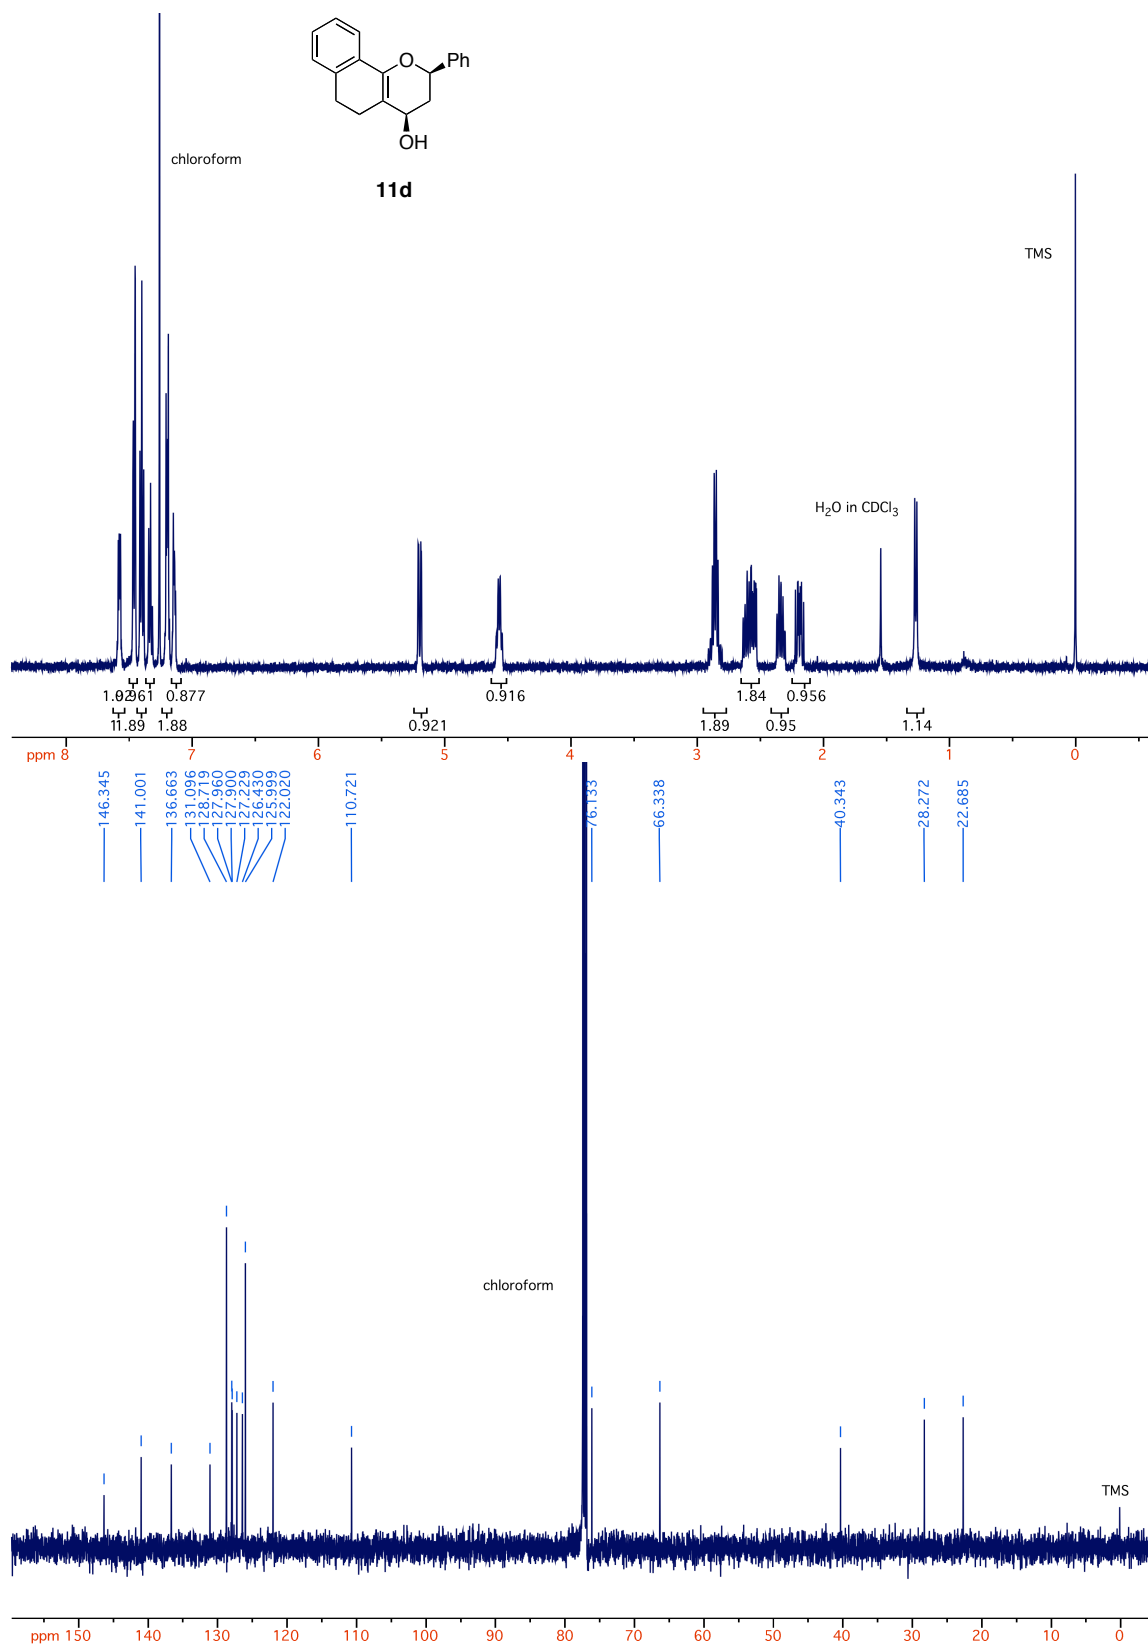



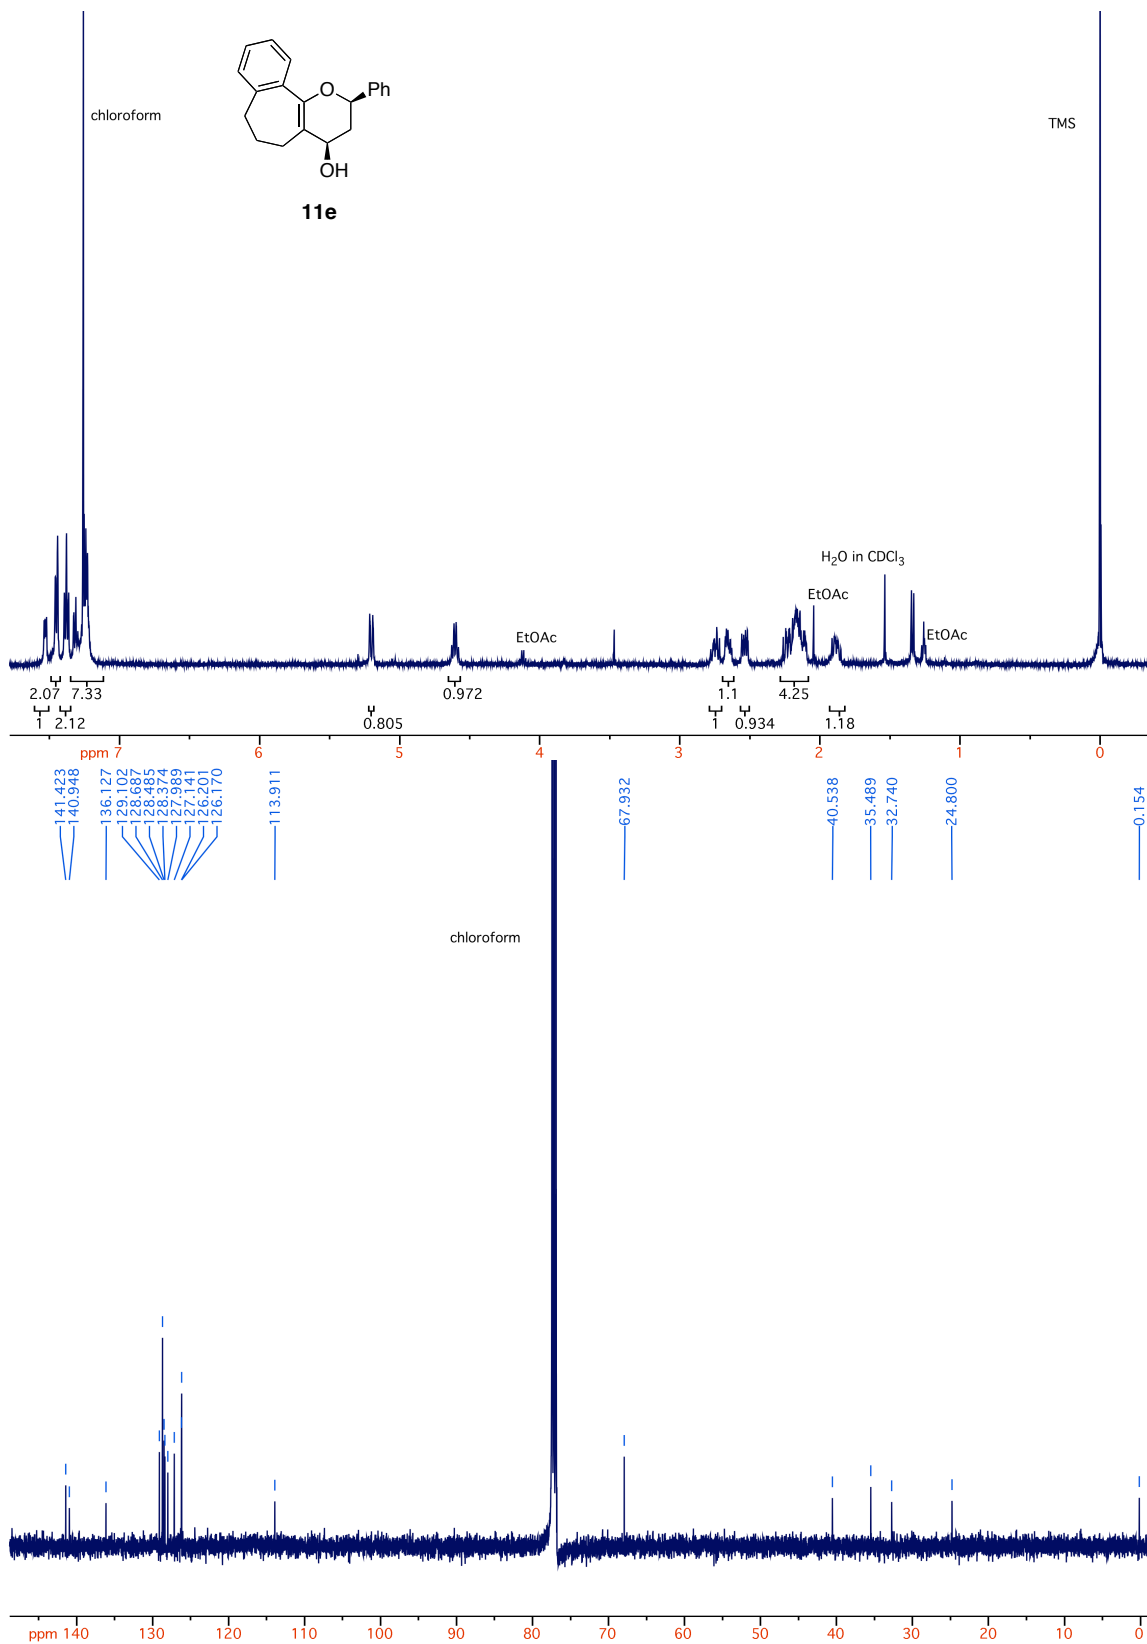

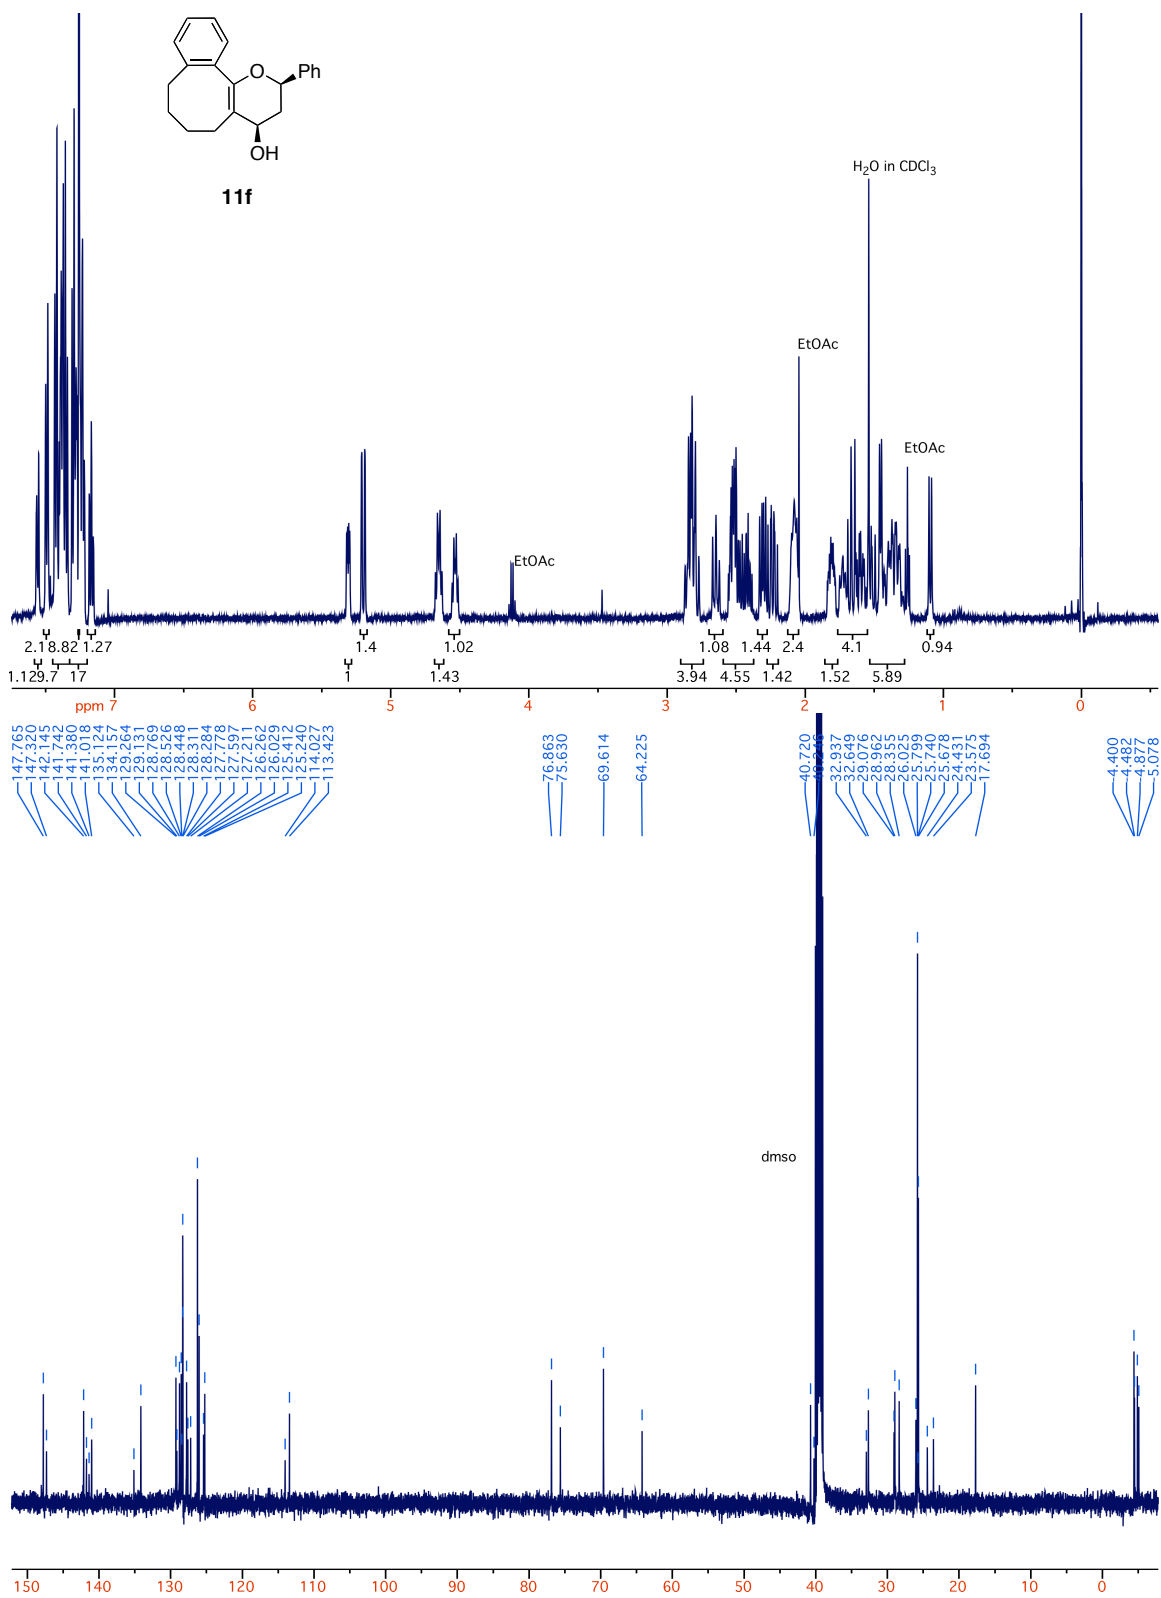

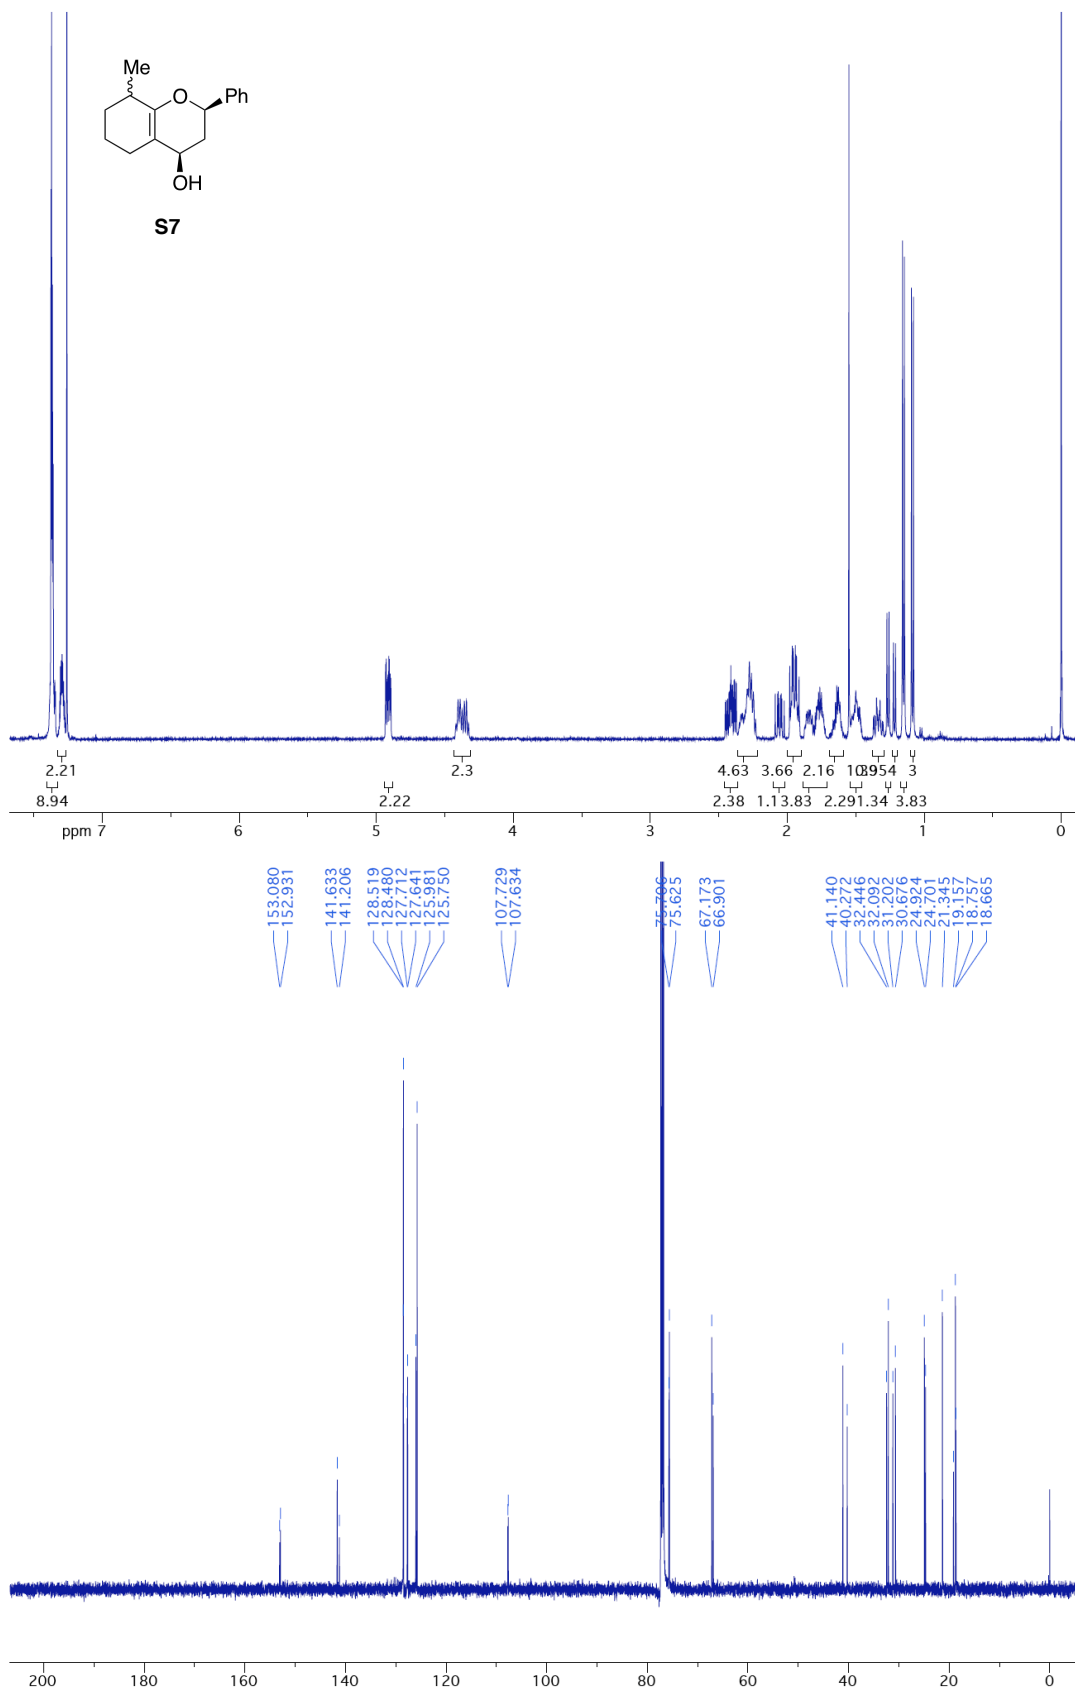



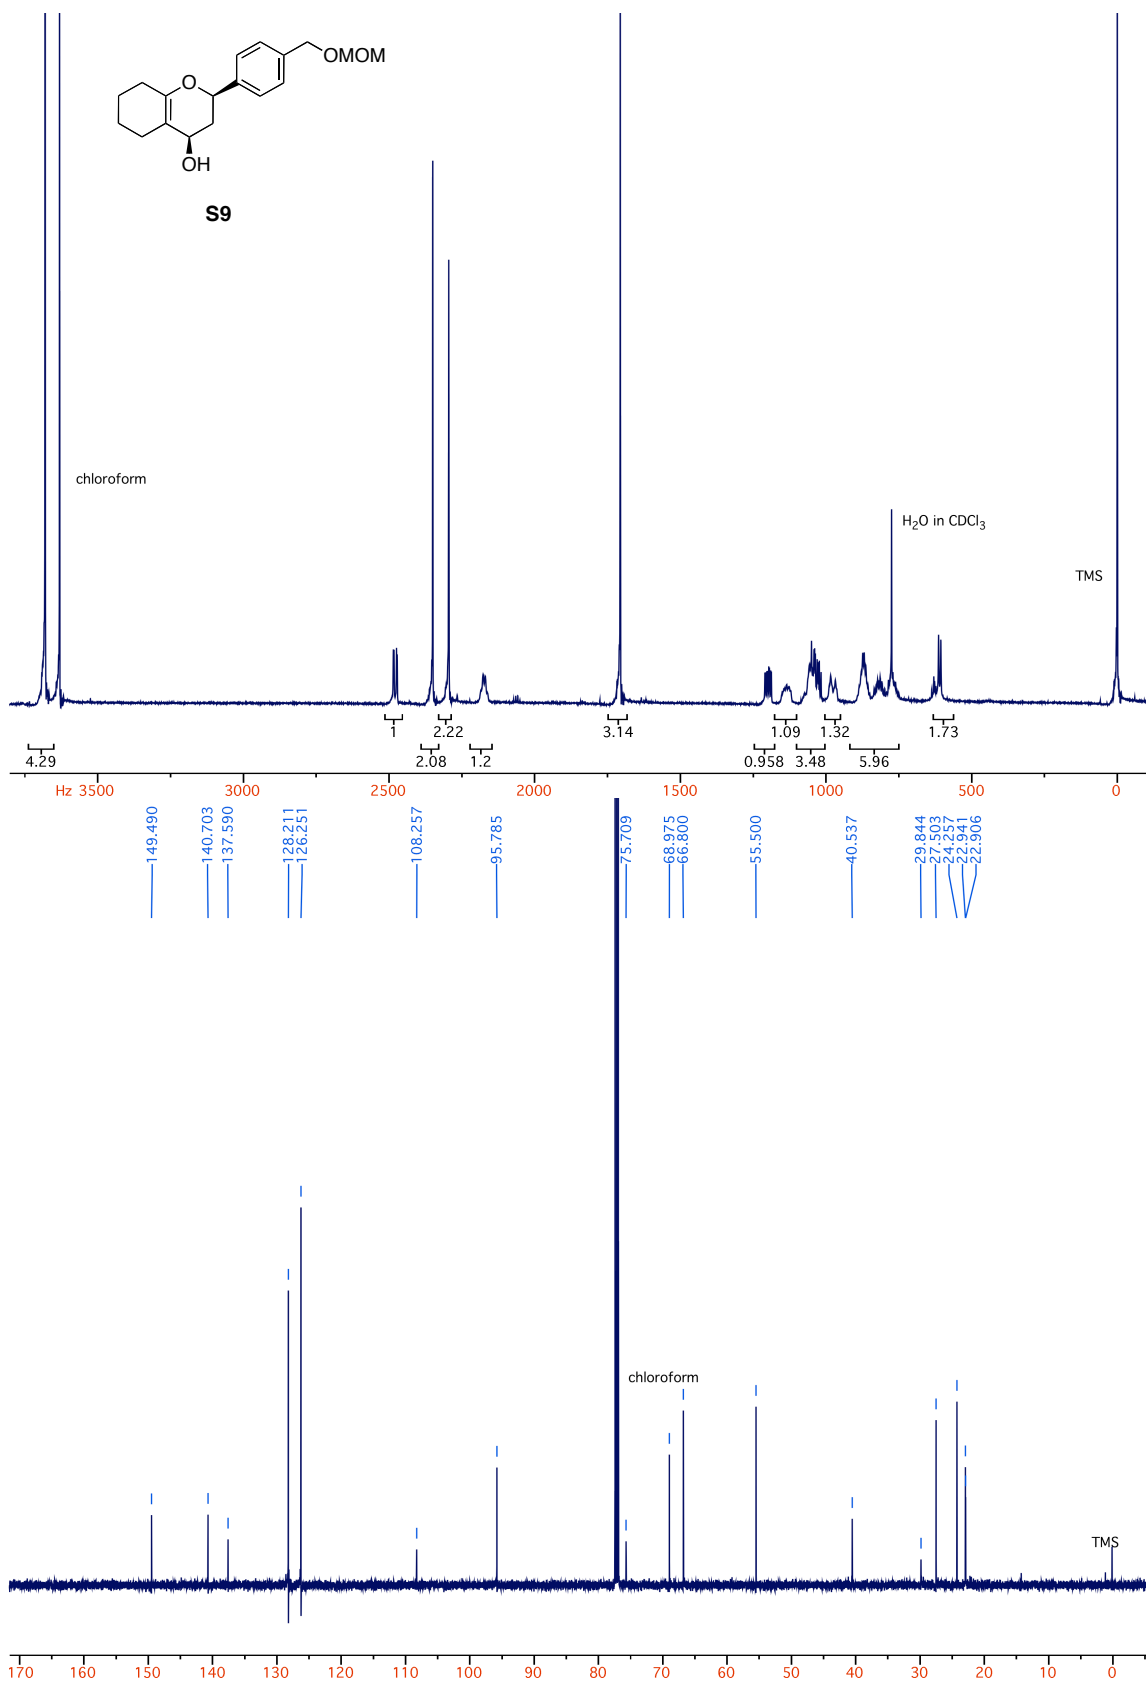

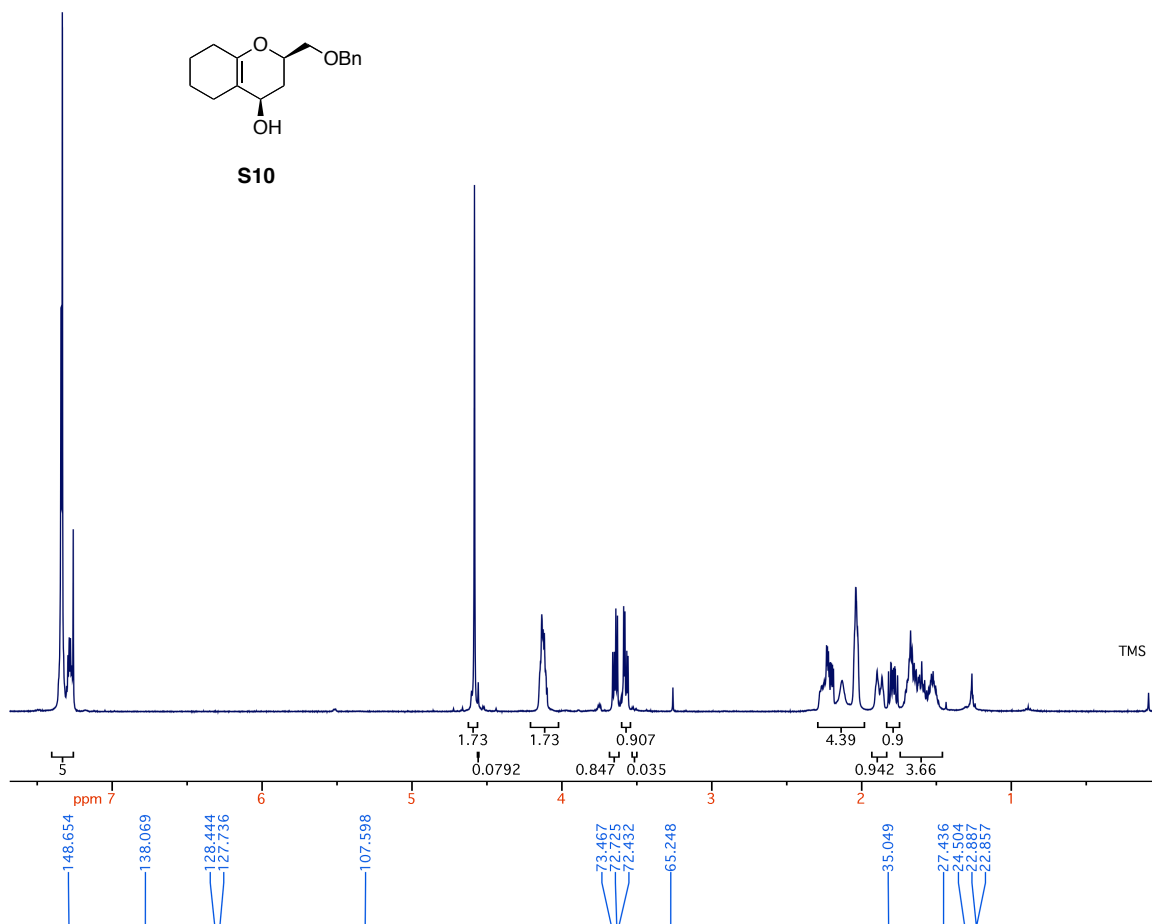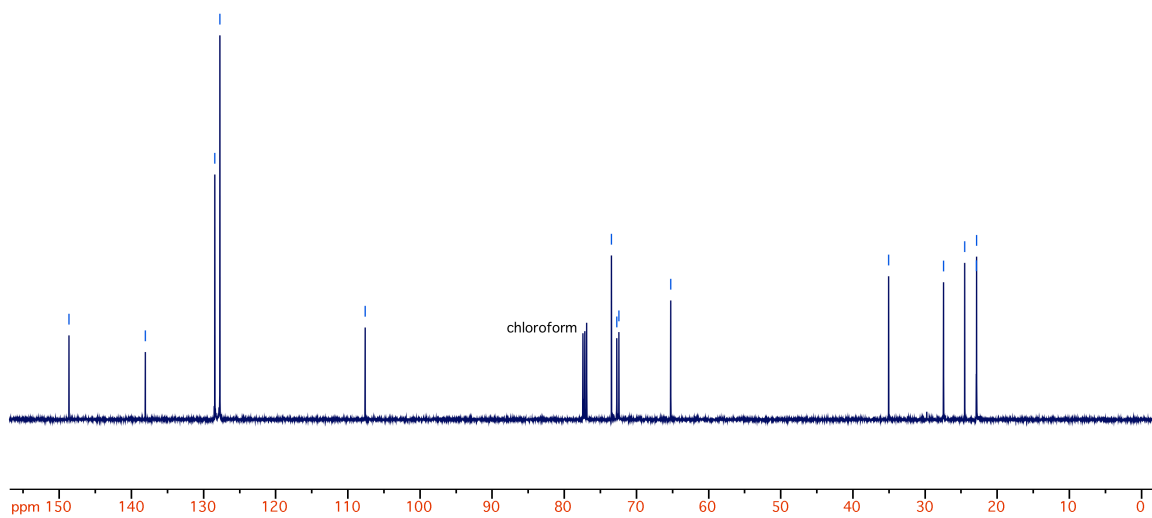

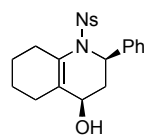**12a**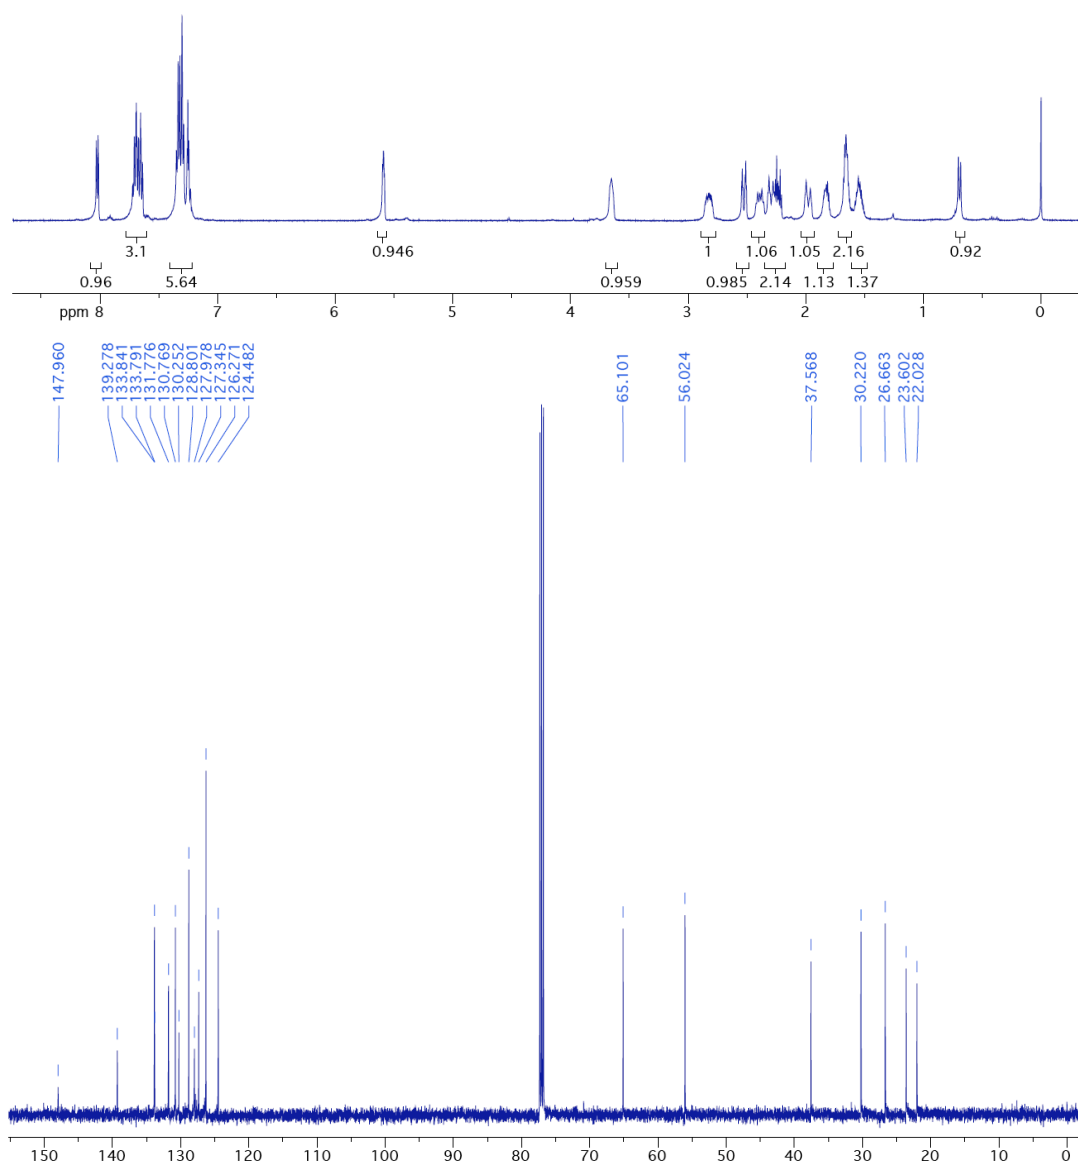

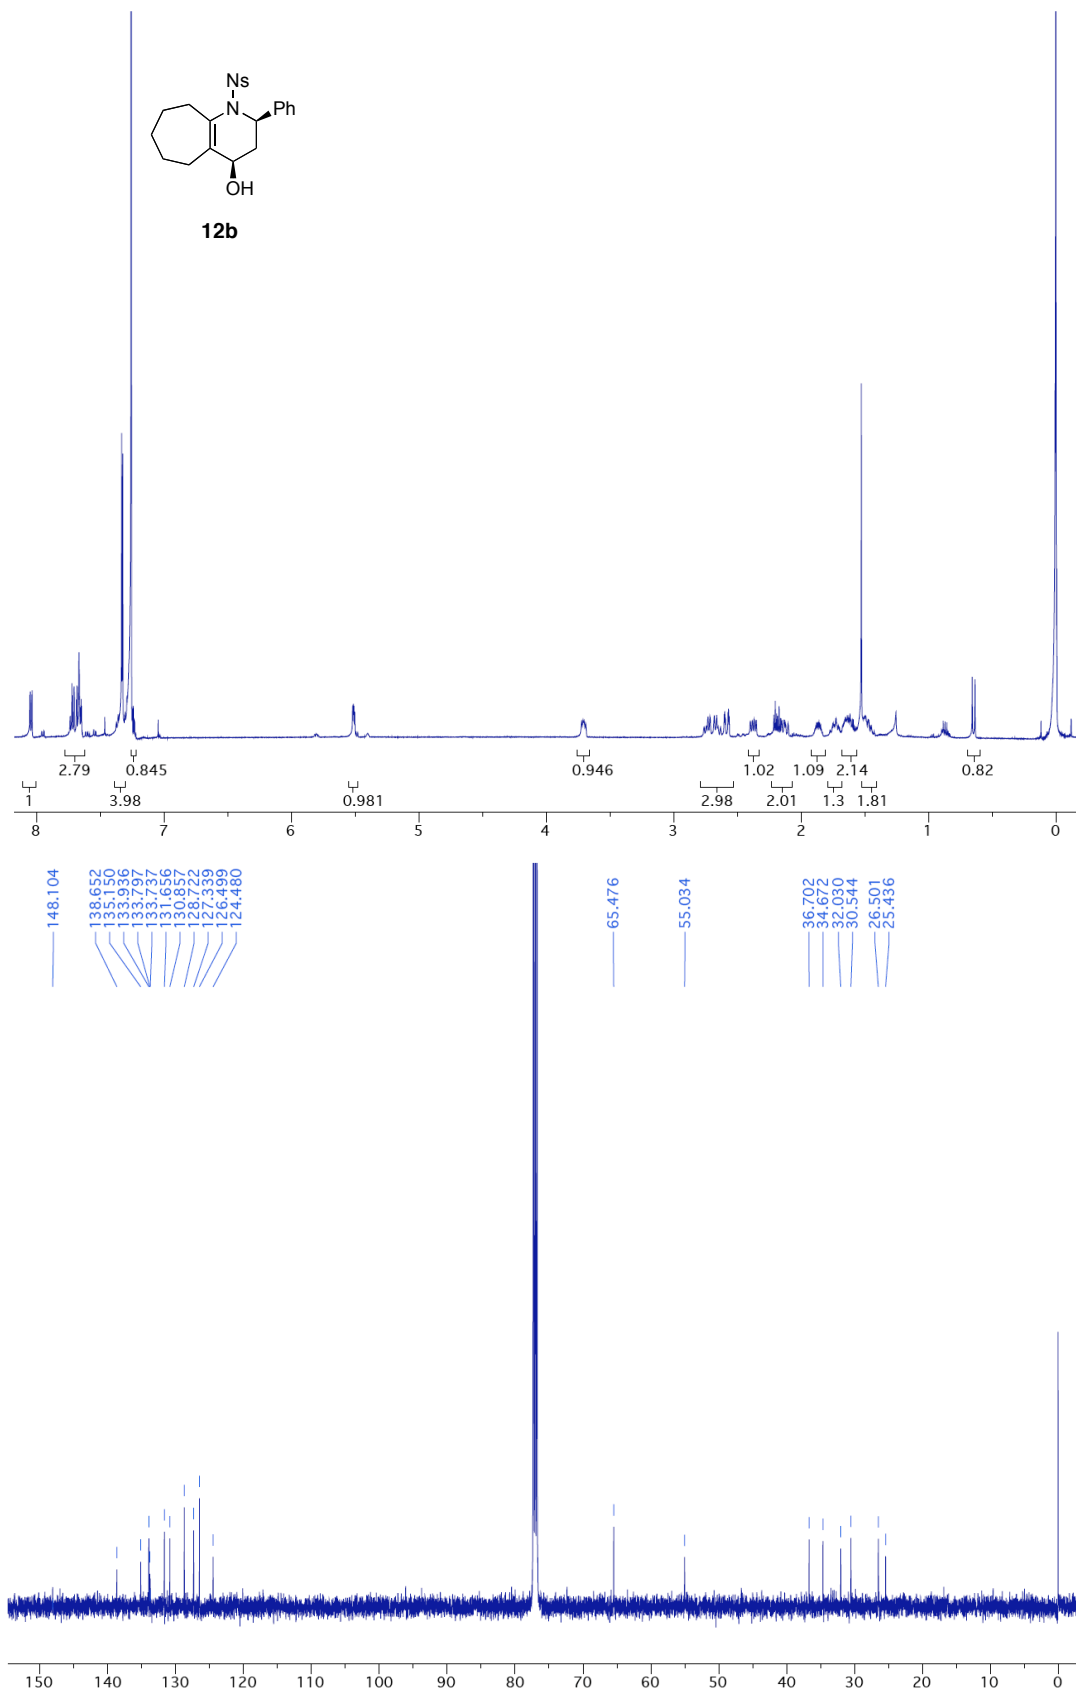



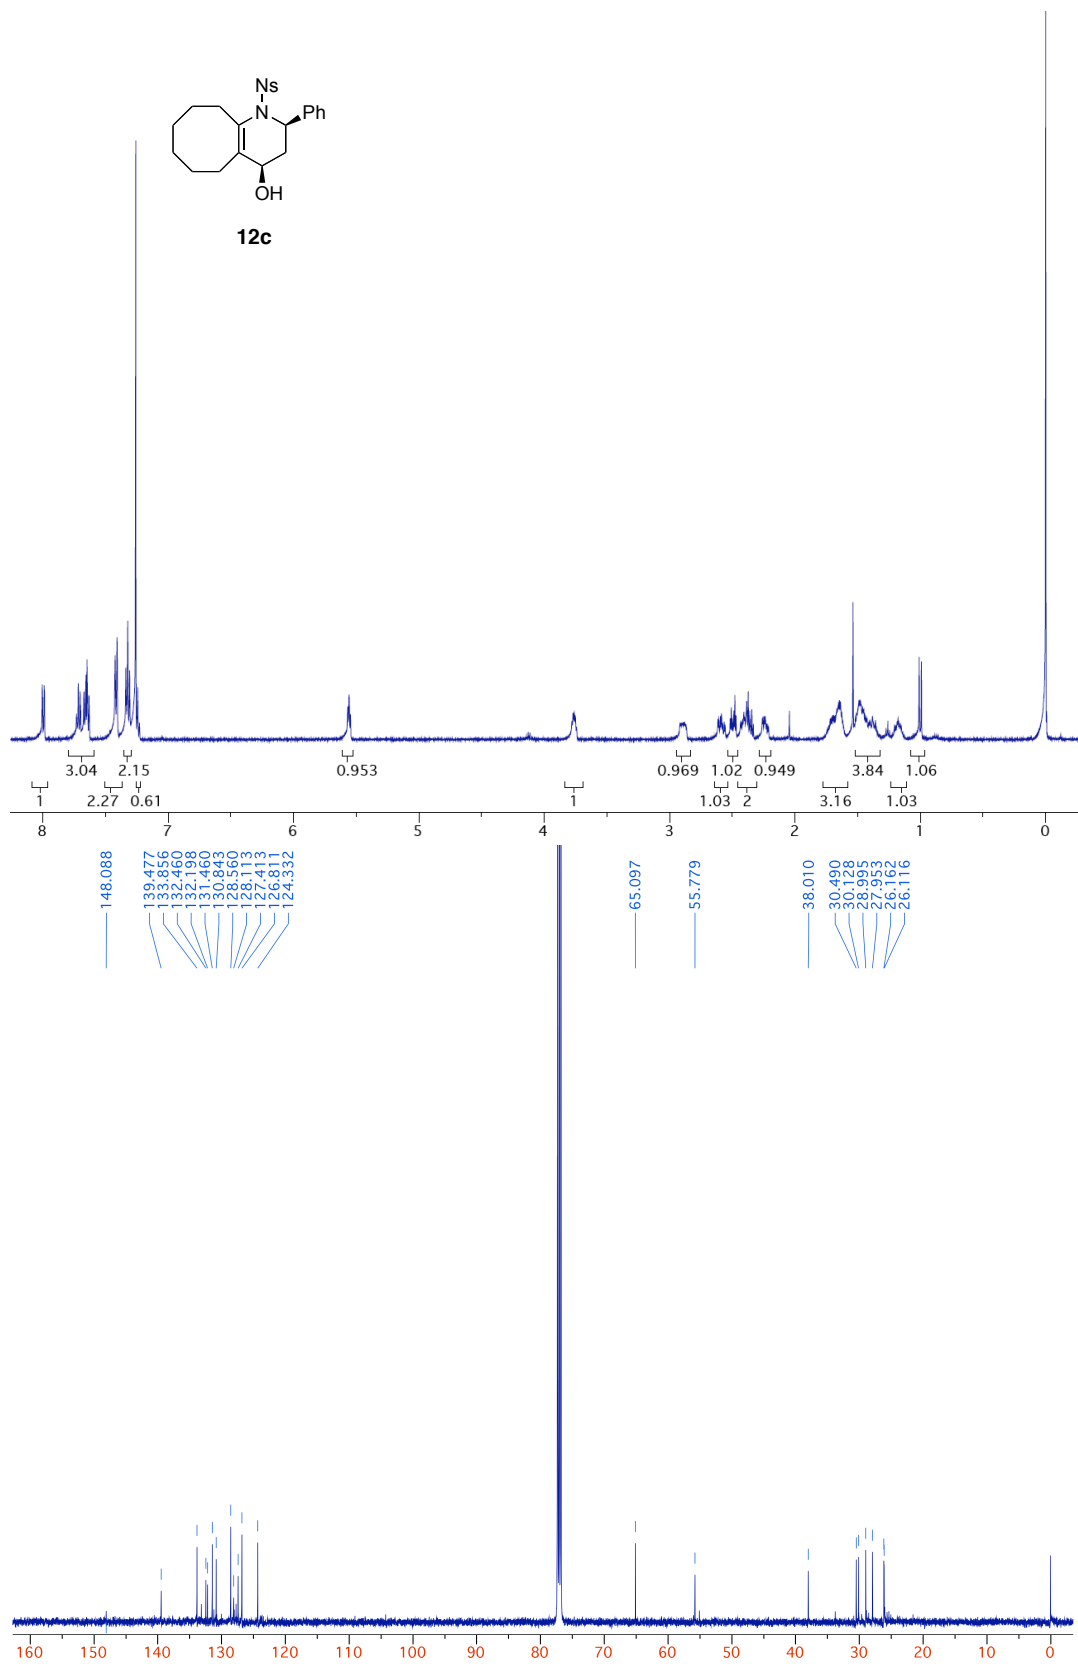

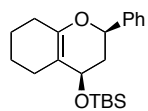**13a**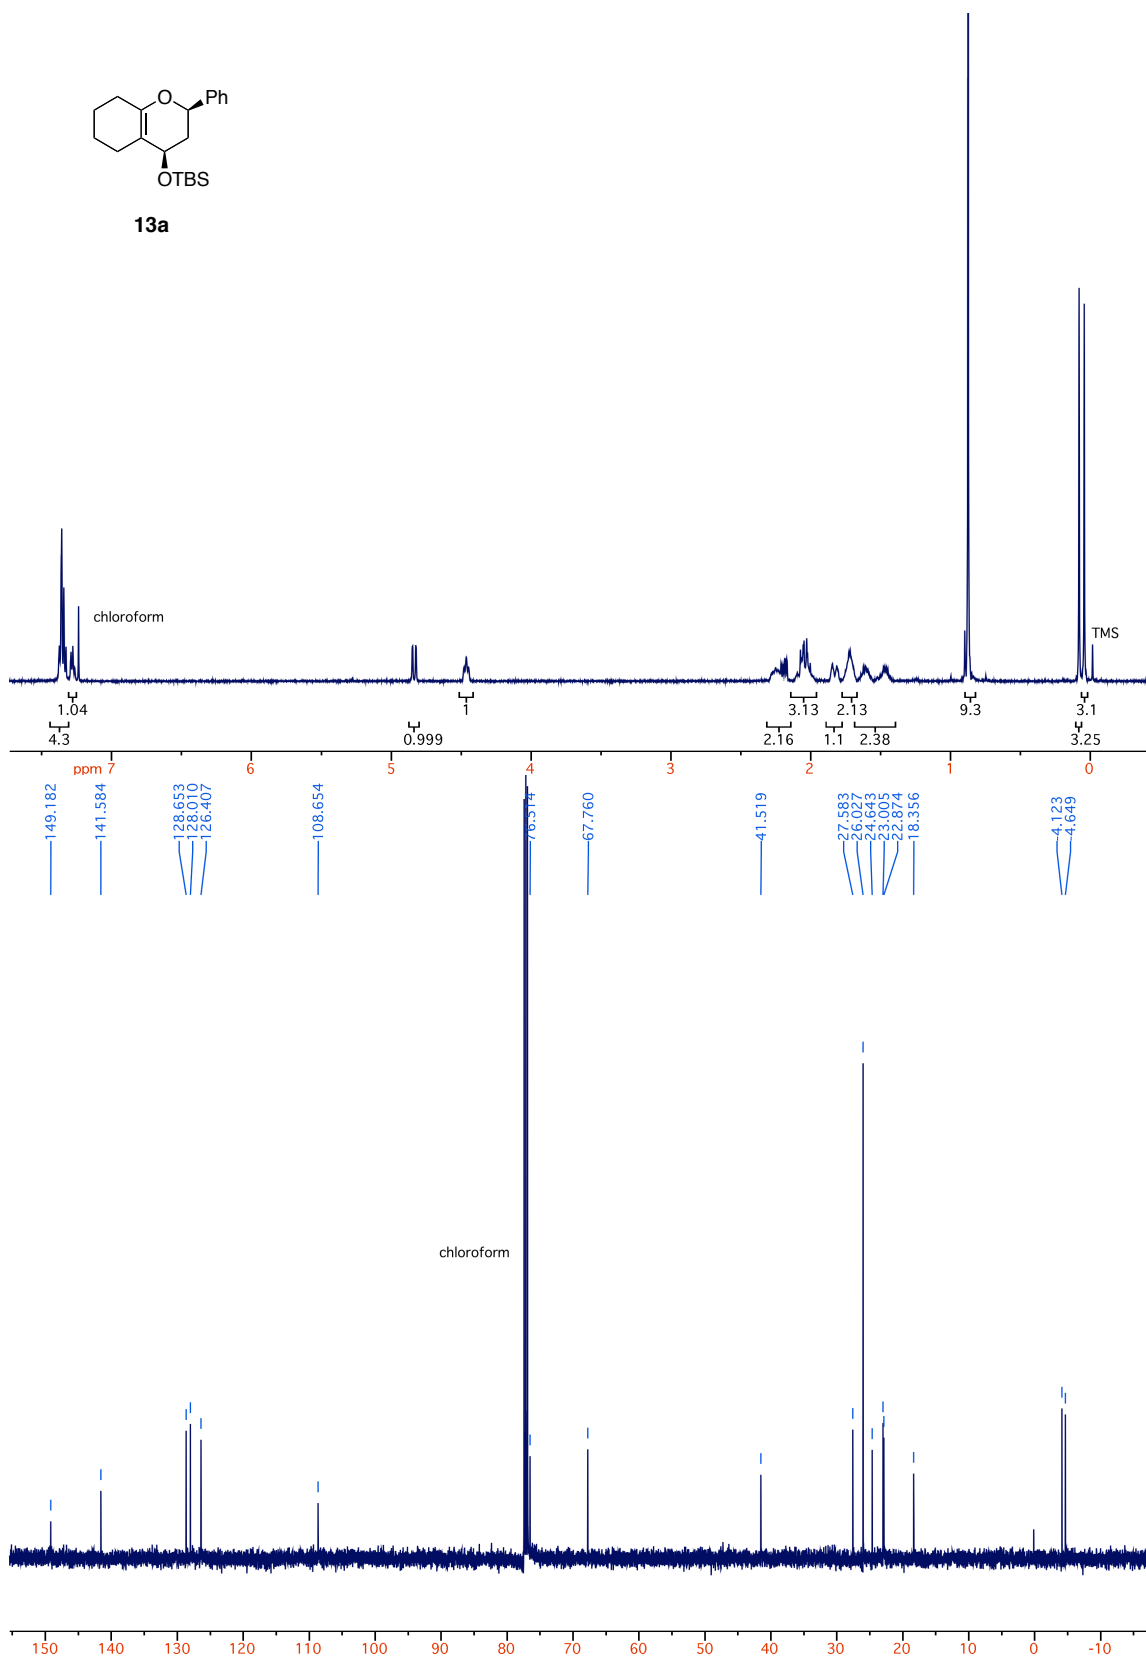

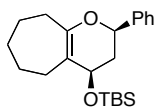**13b**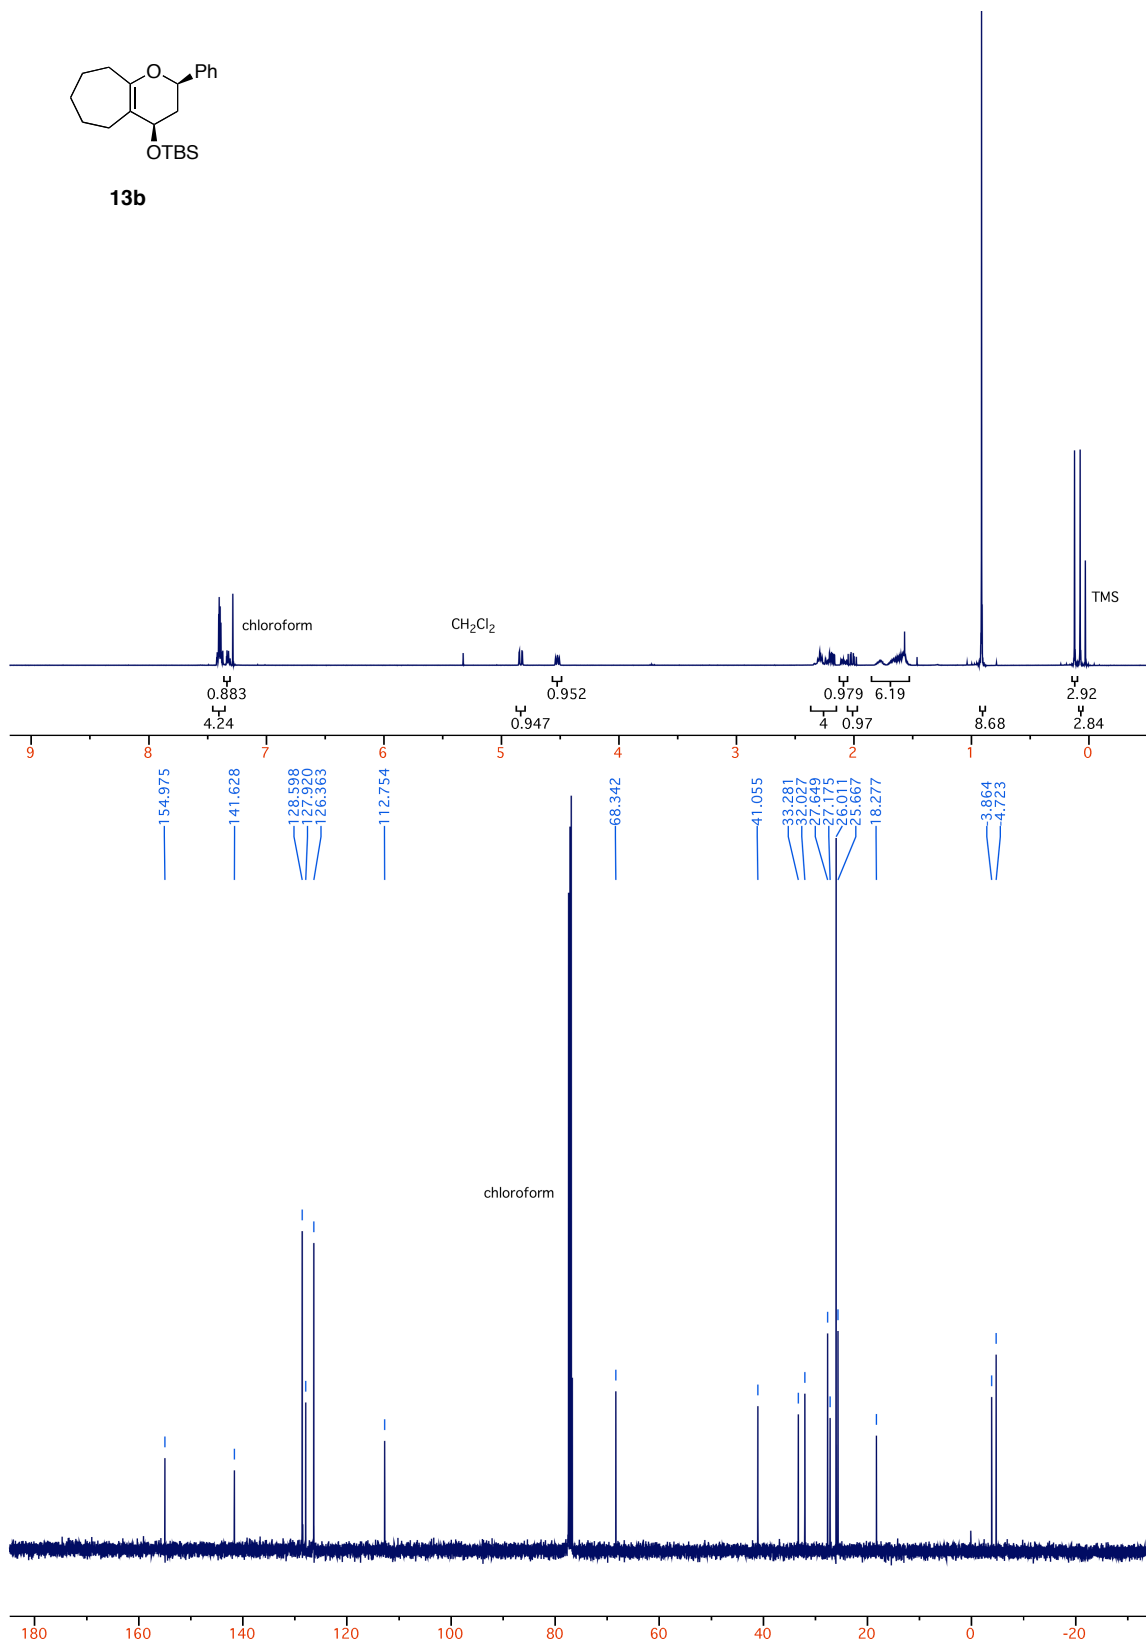

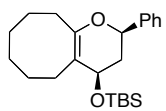**13c**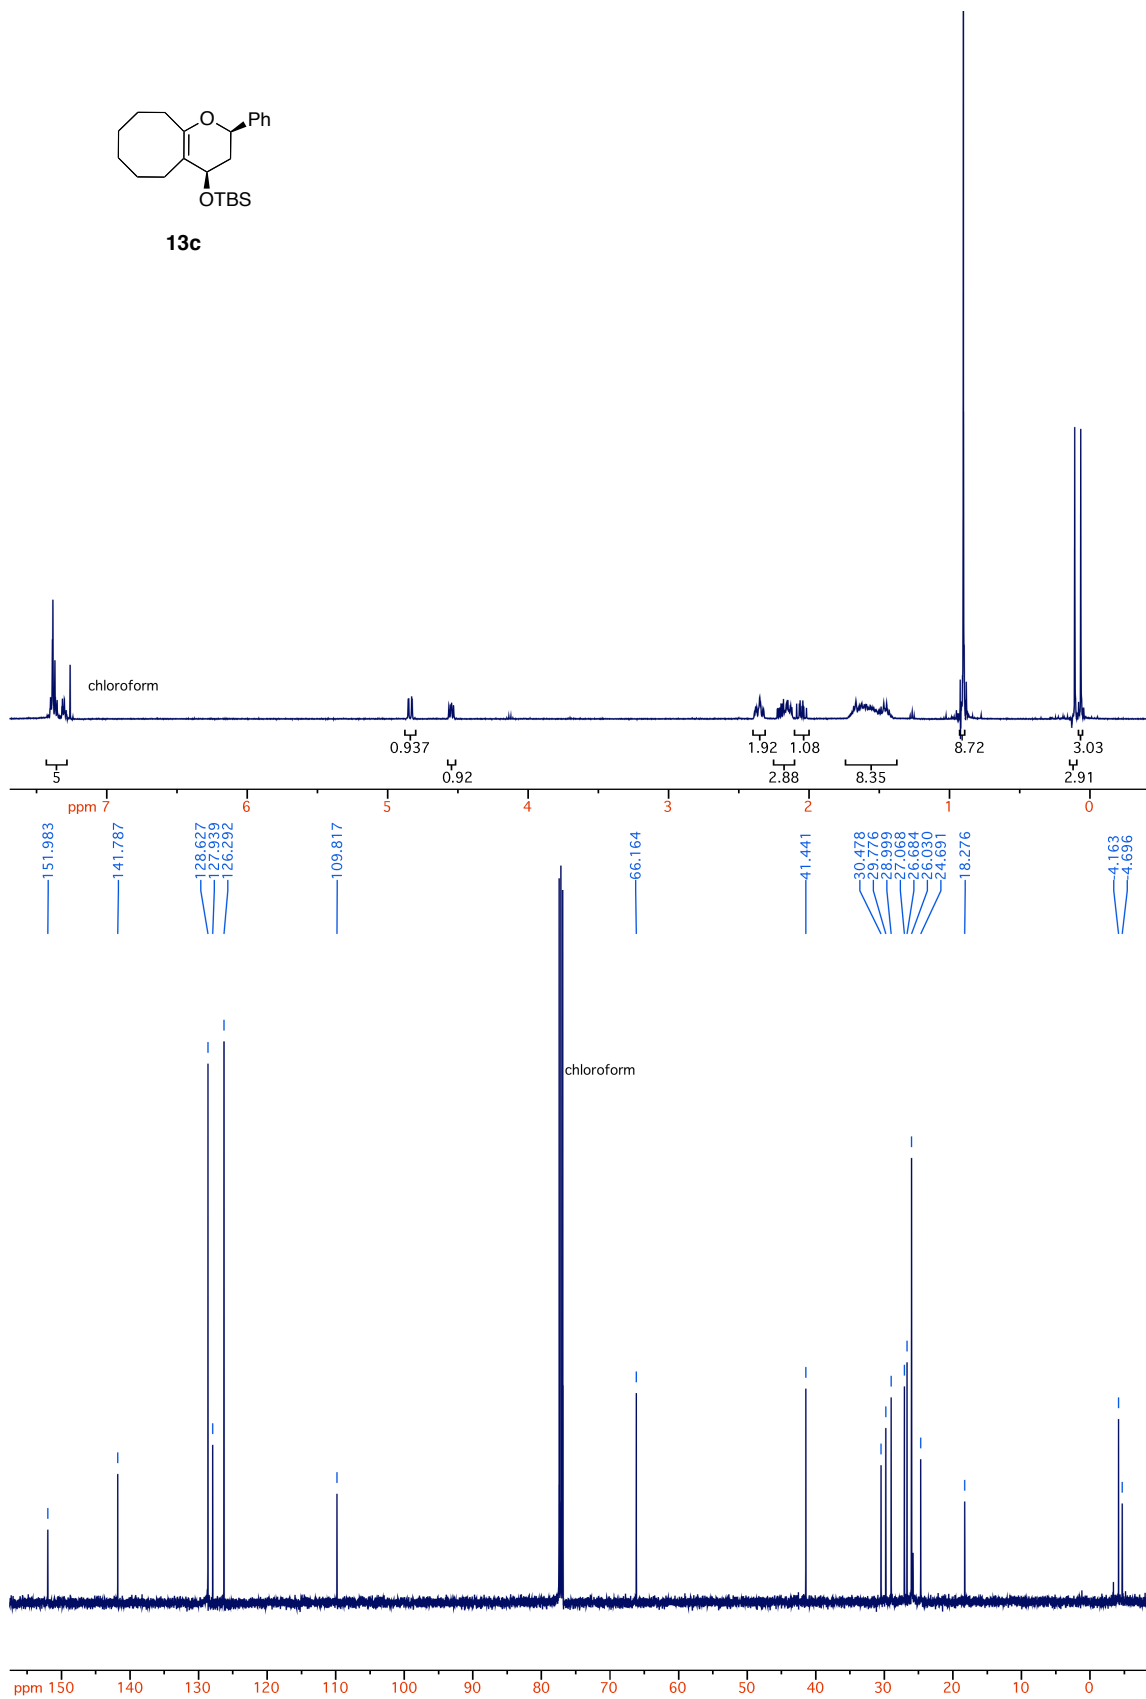

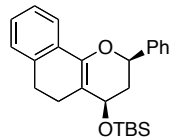**13d**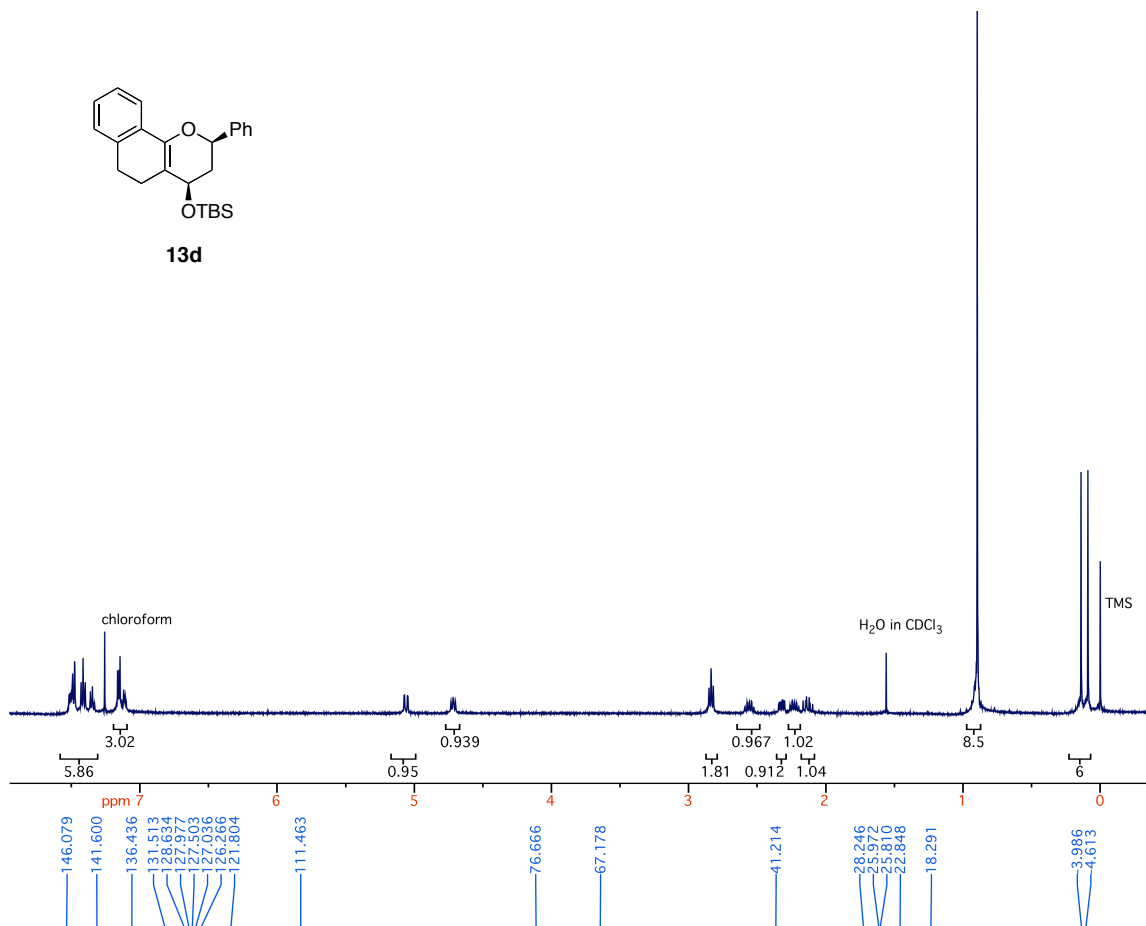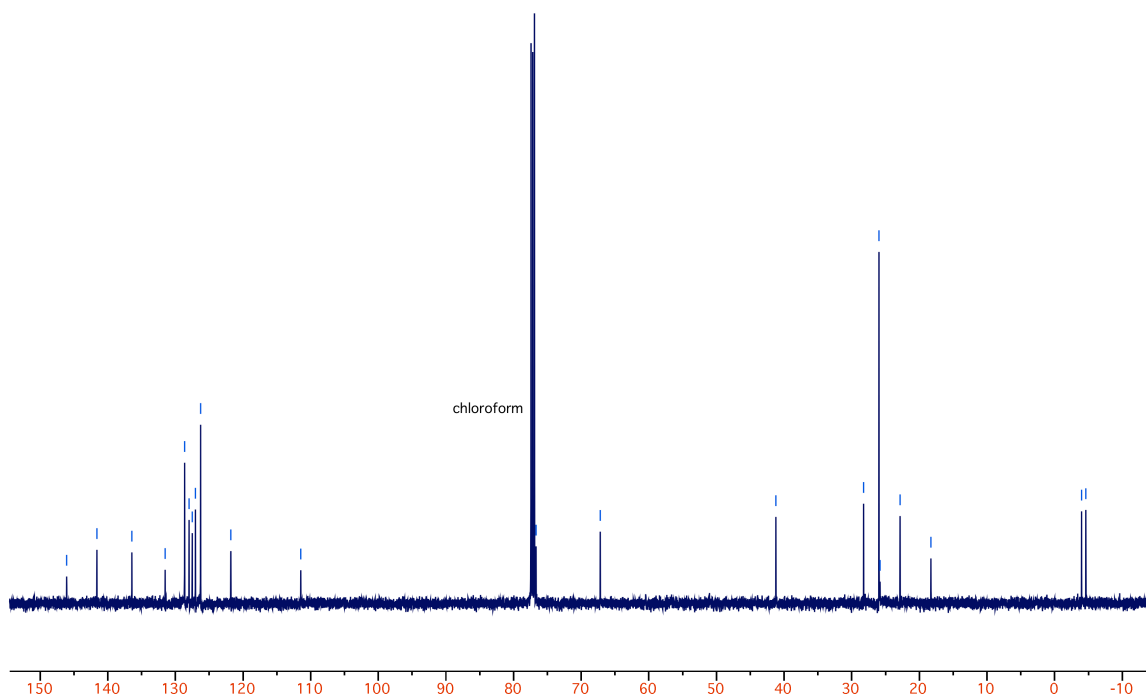

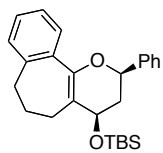**13e**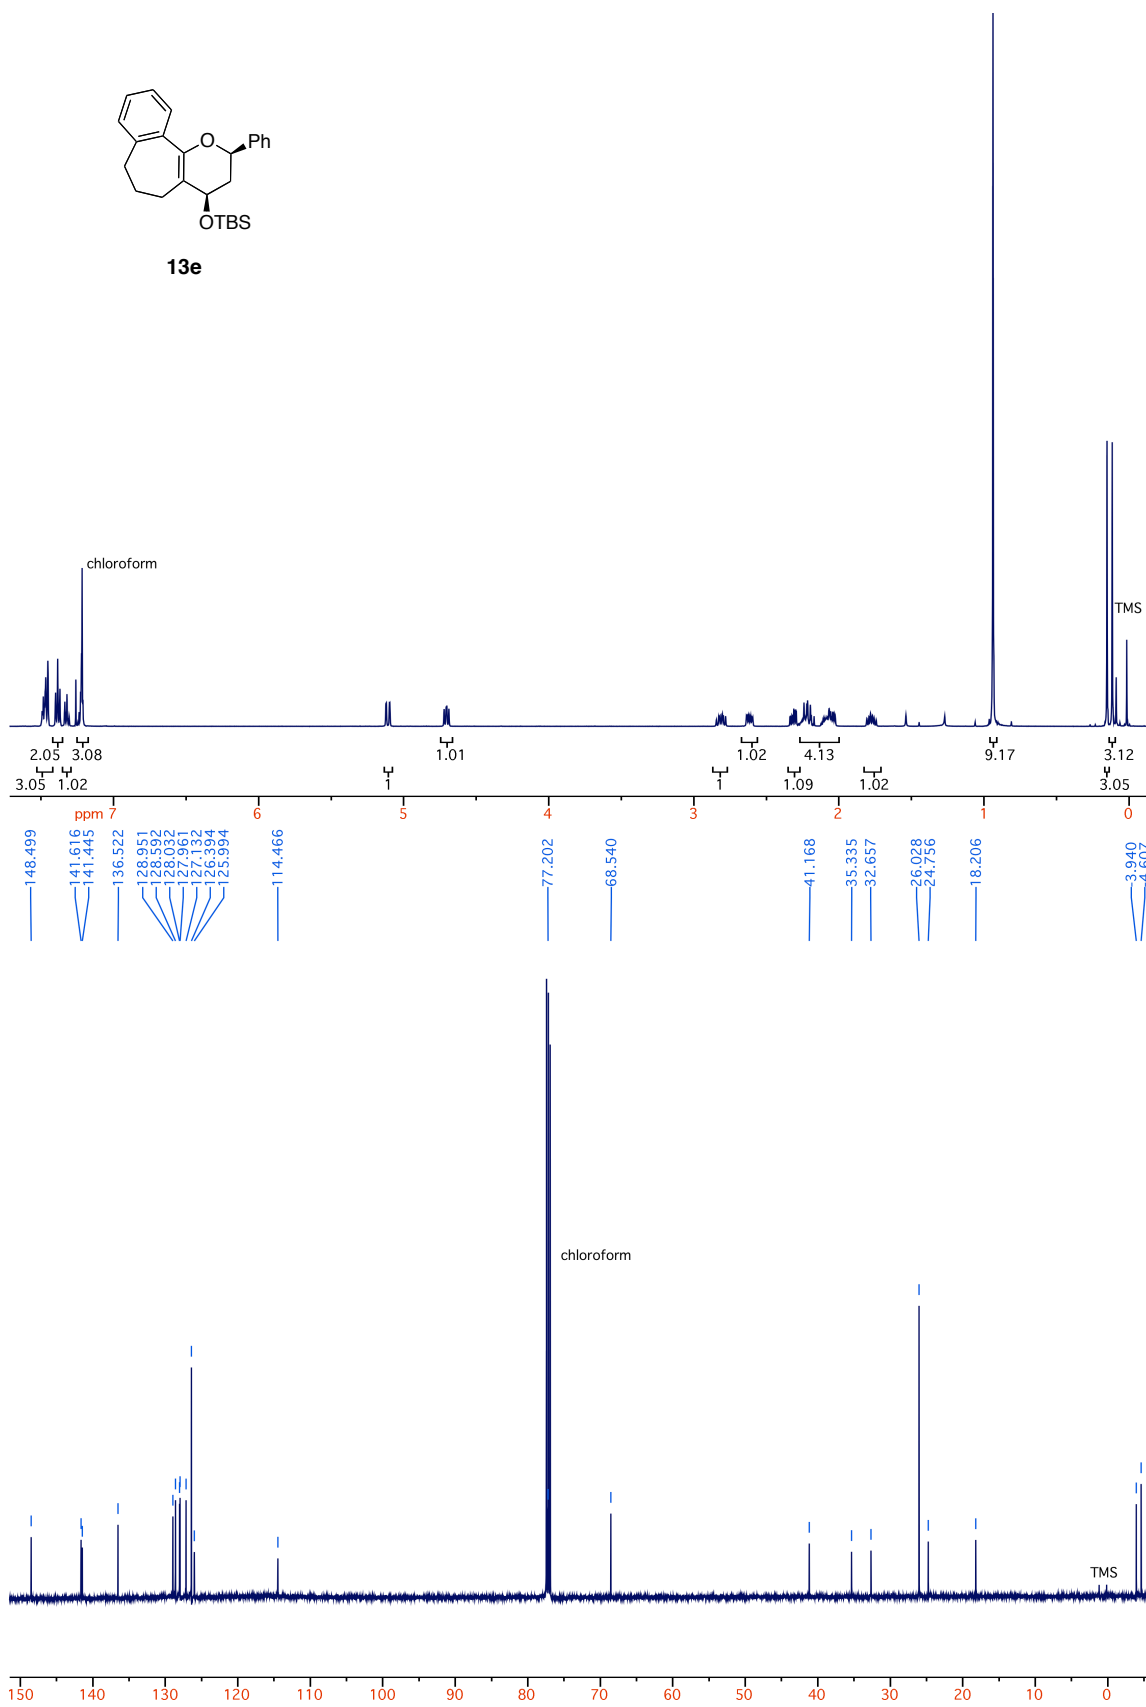



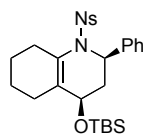**14a**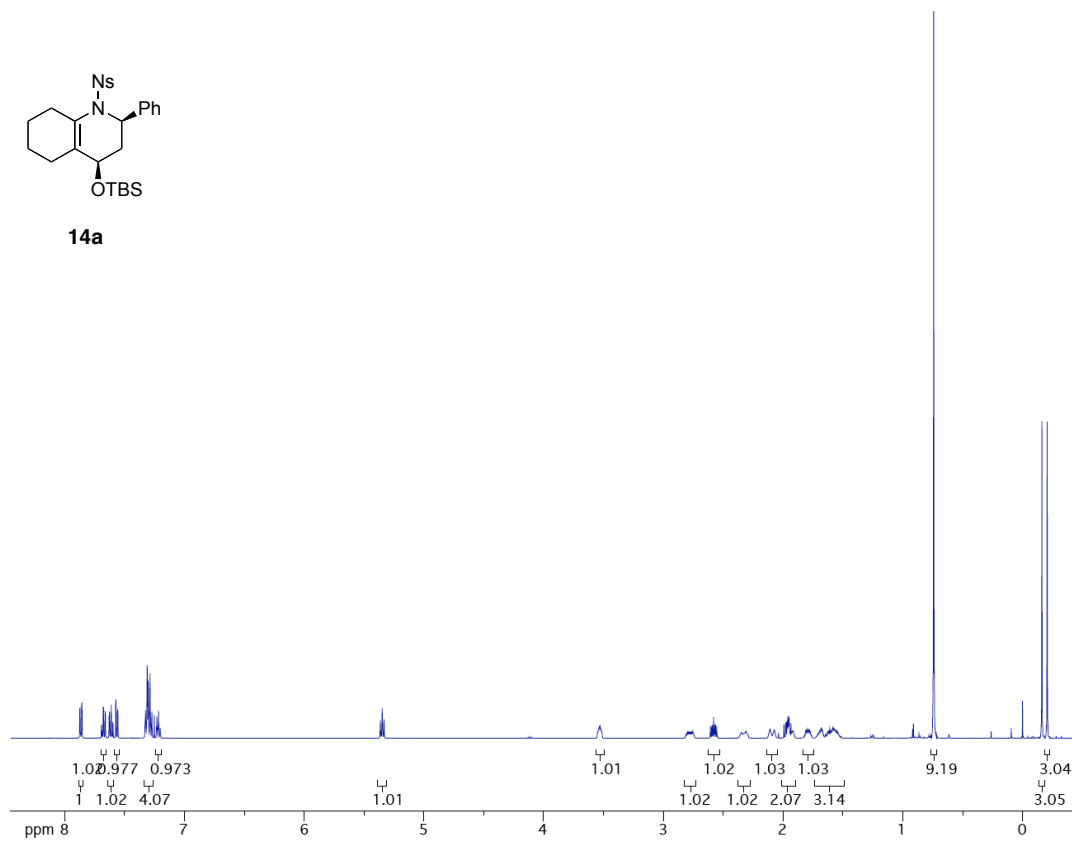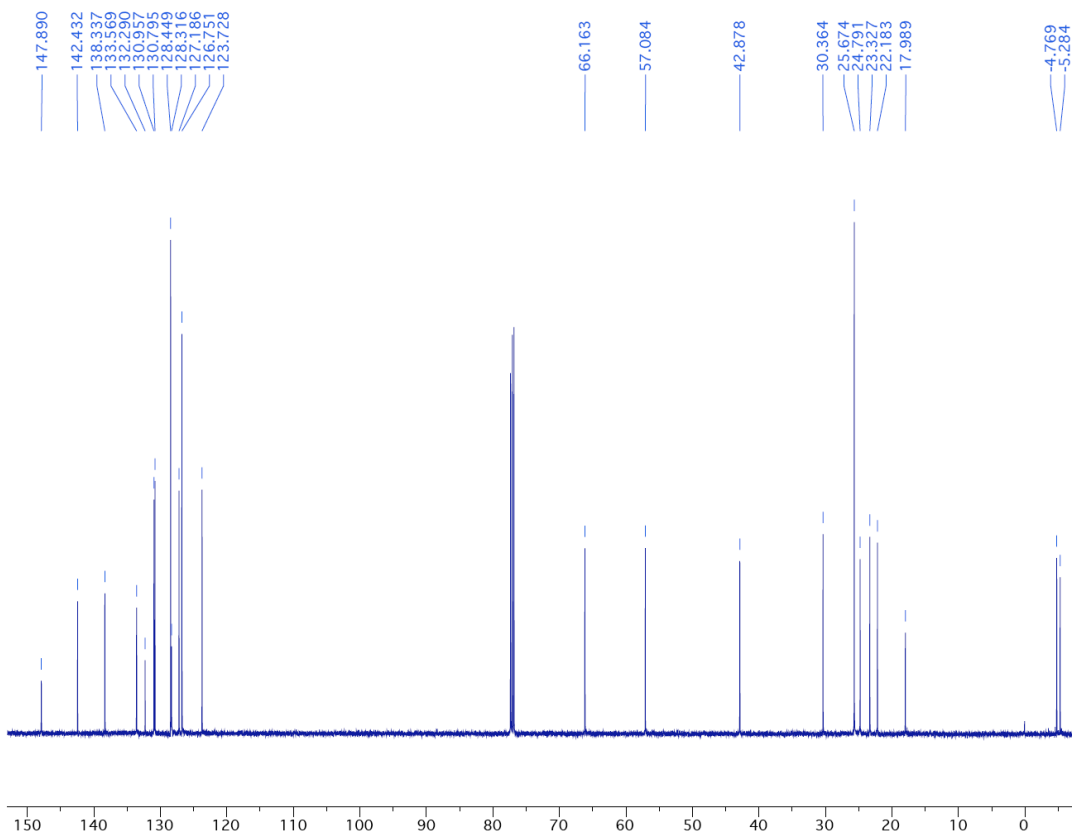





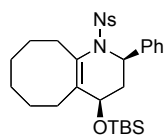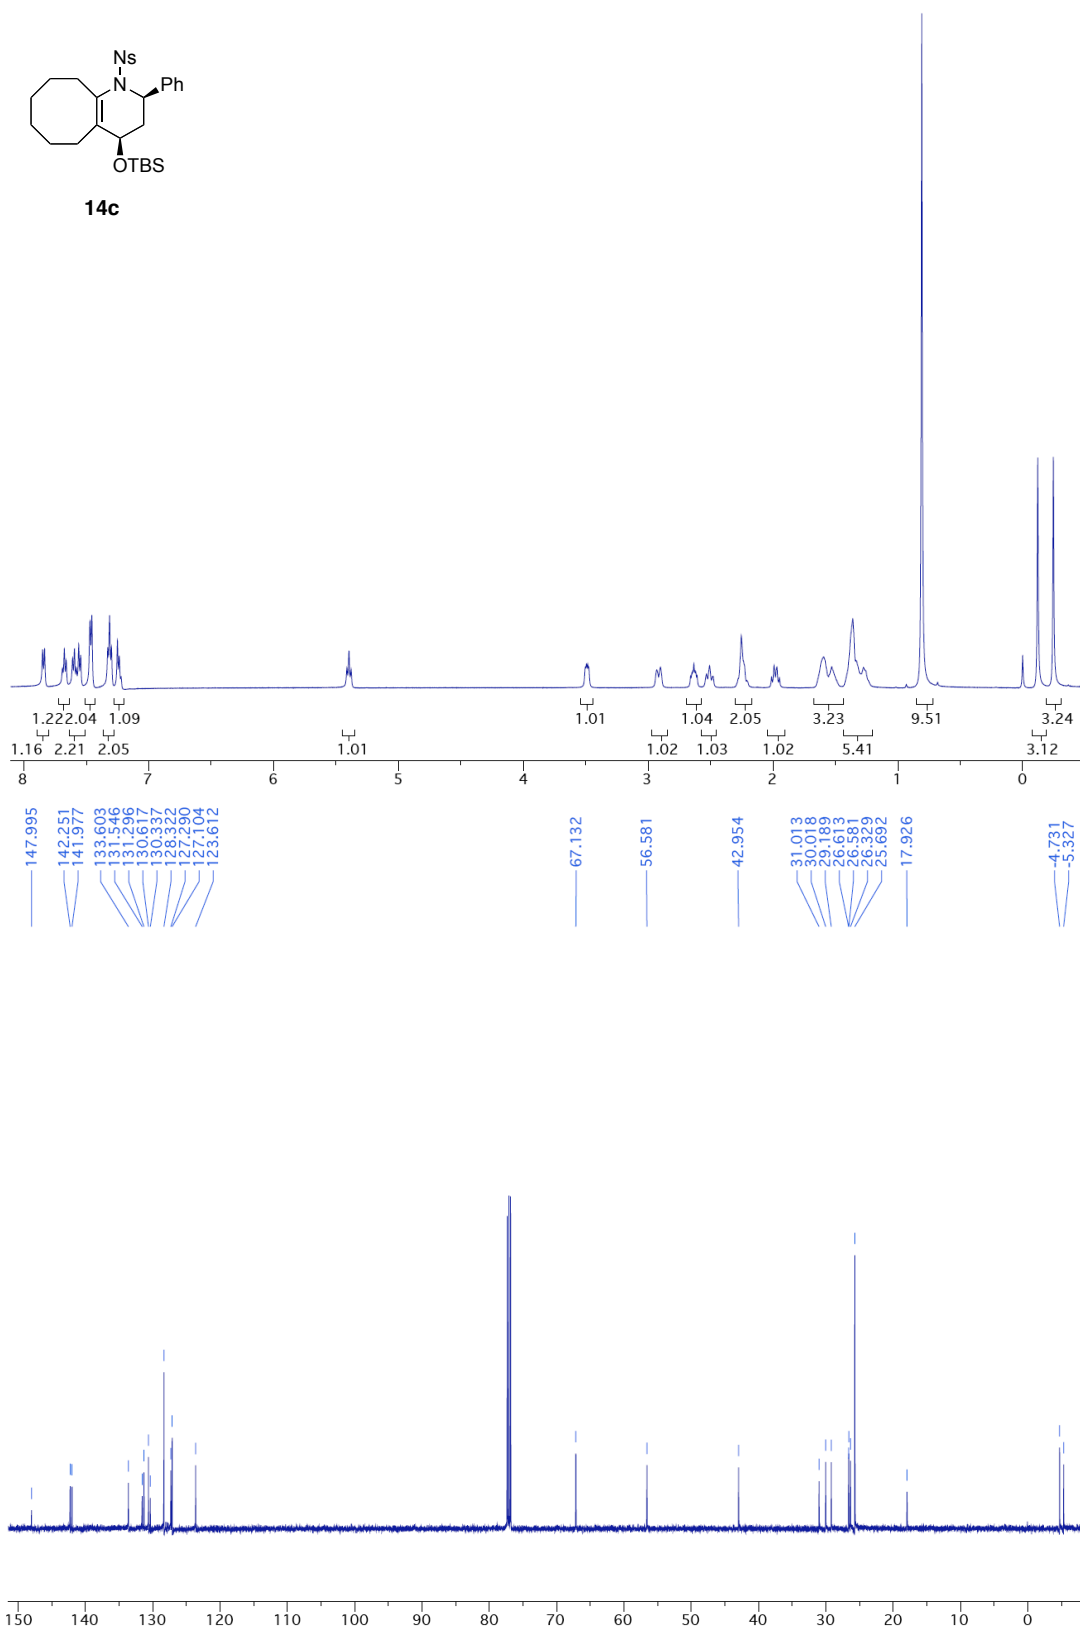

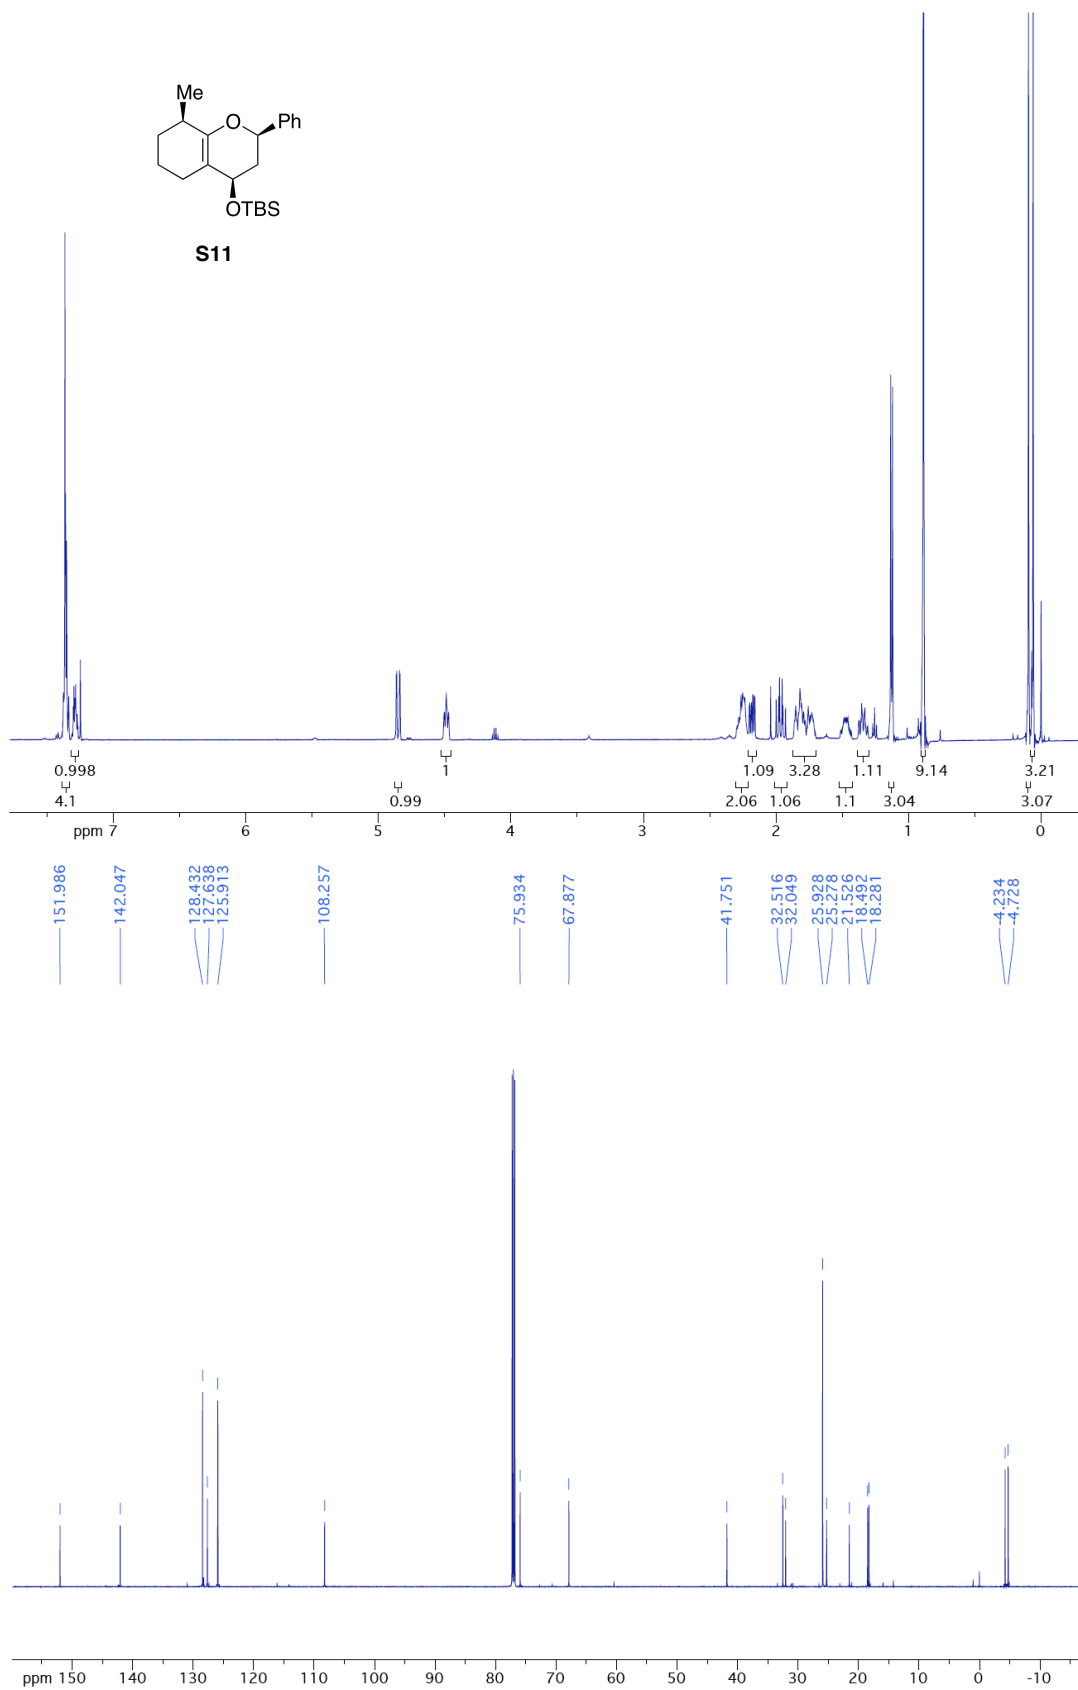

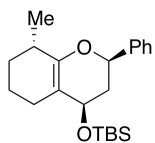**S12**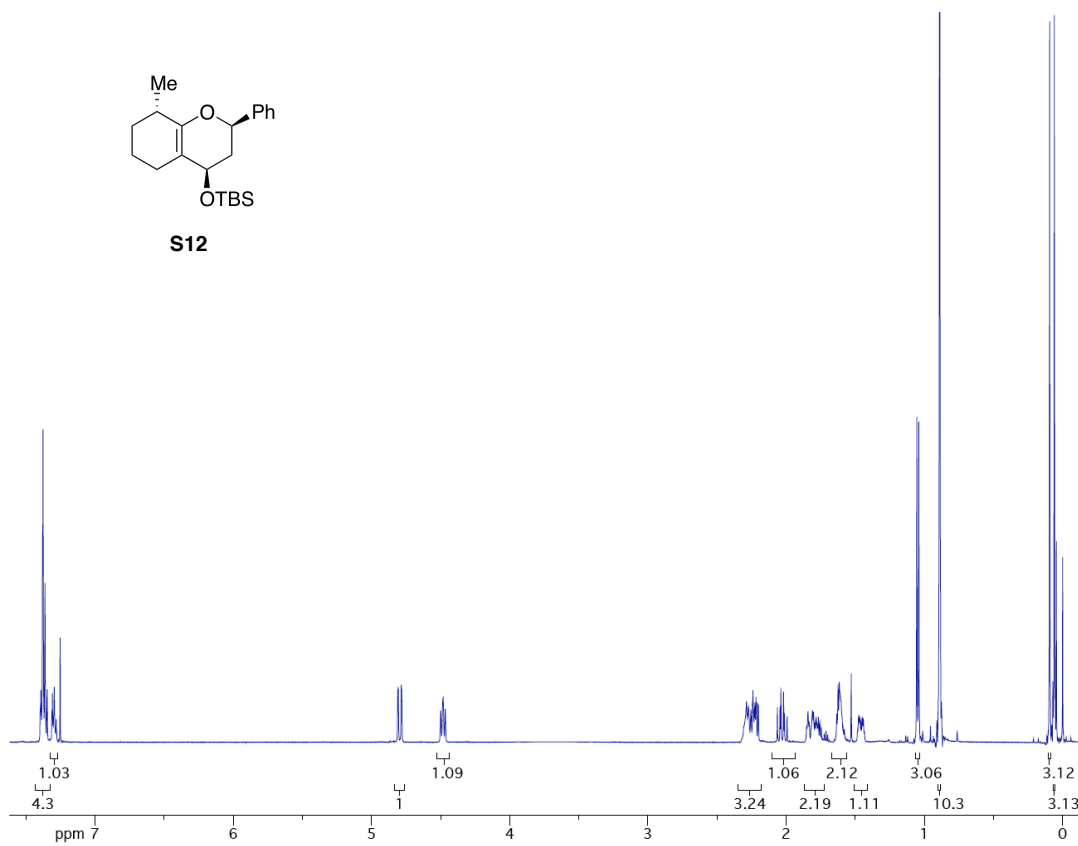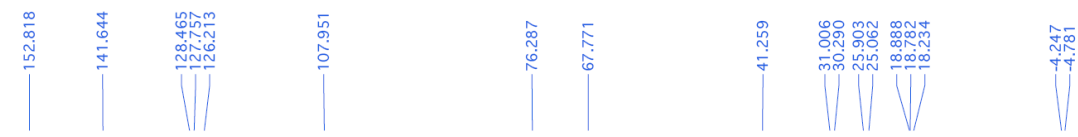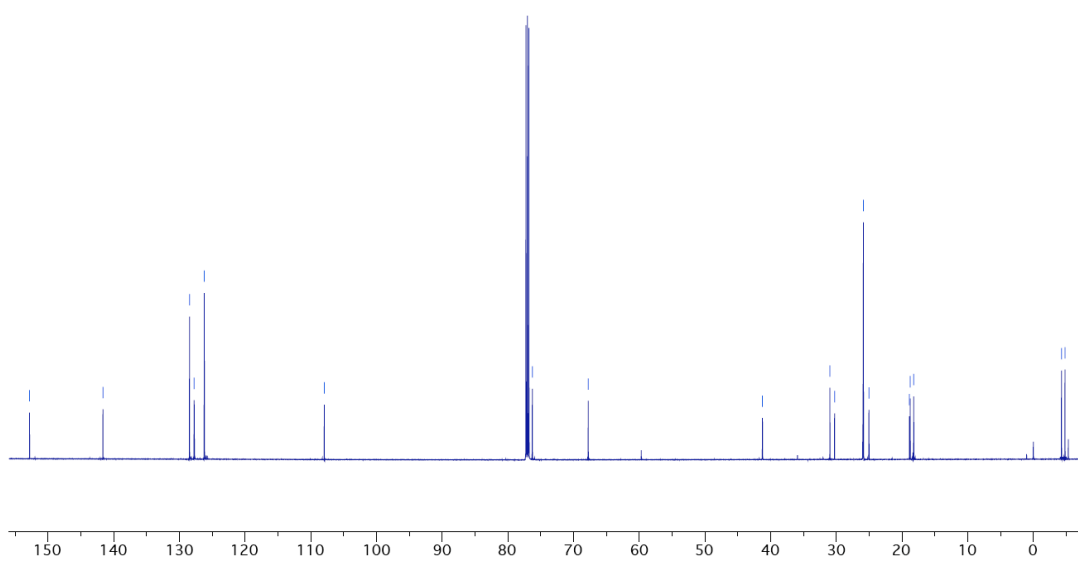

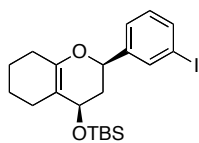**S13**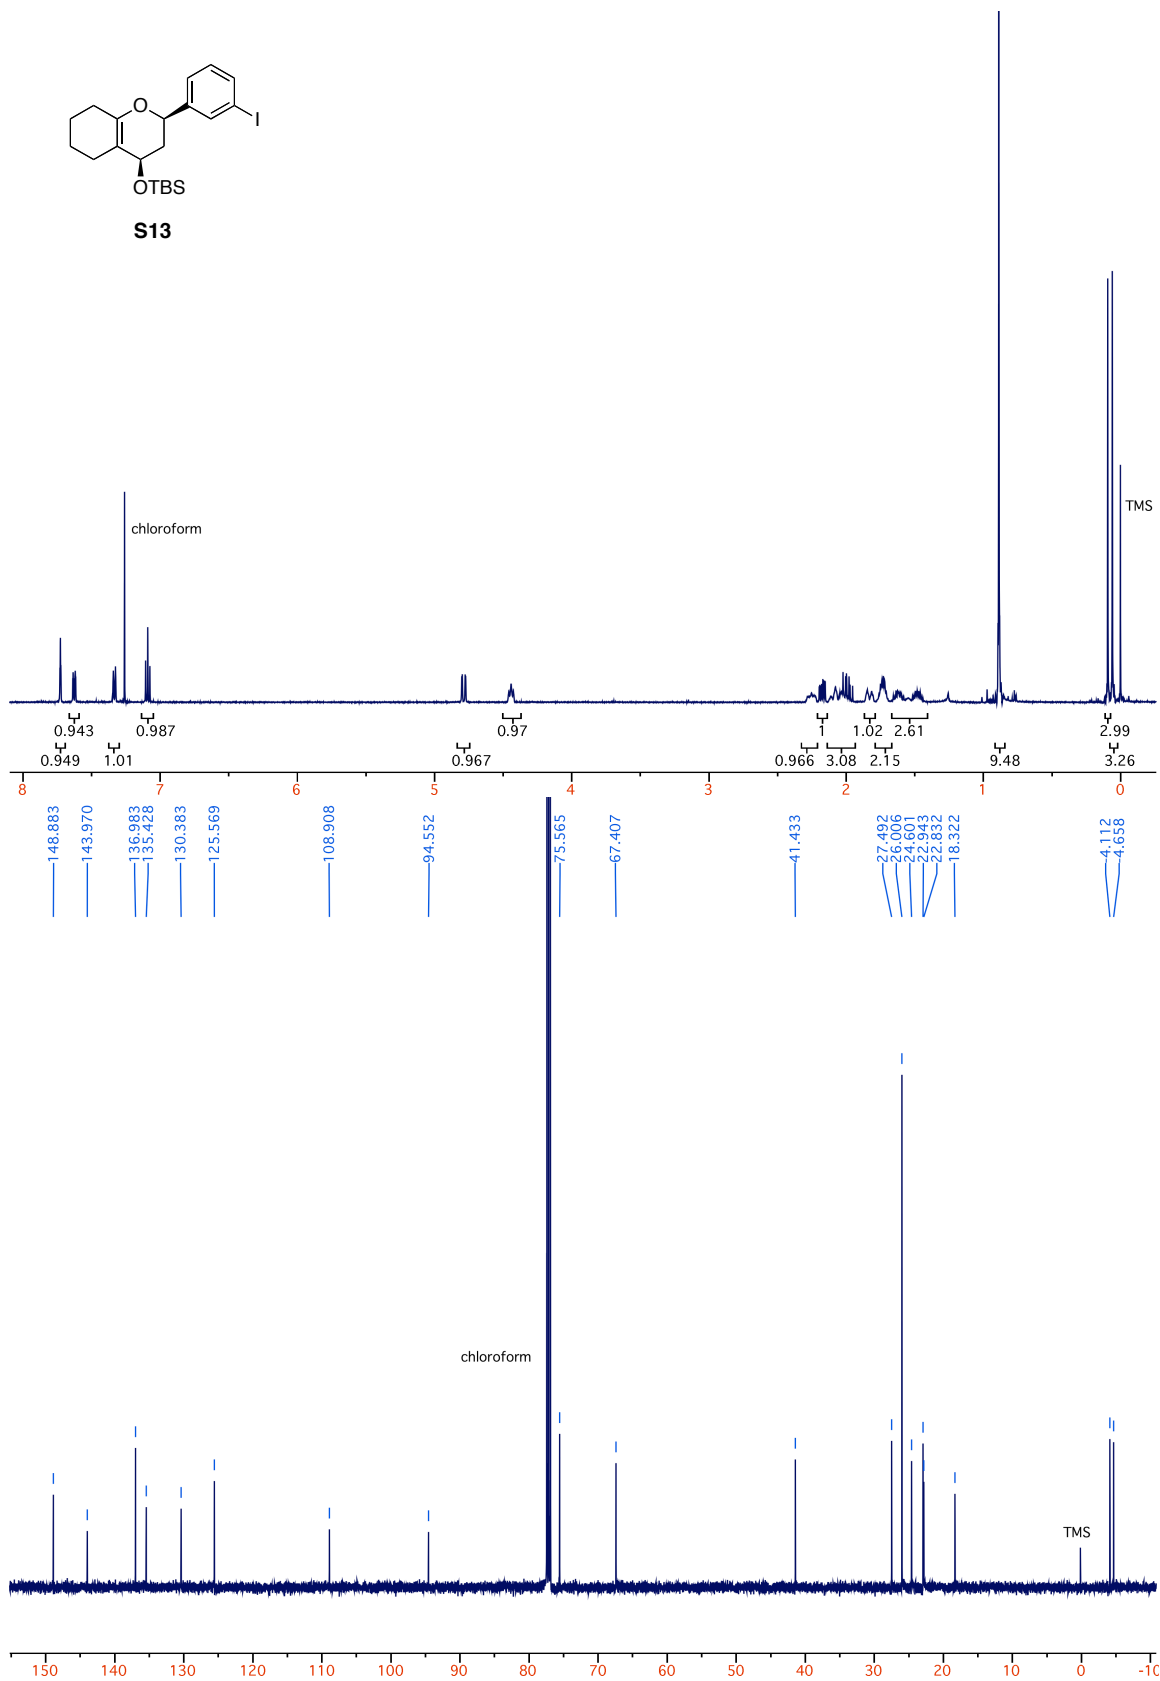

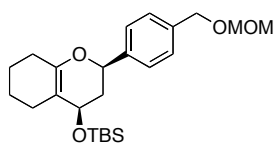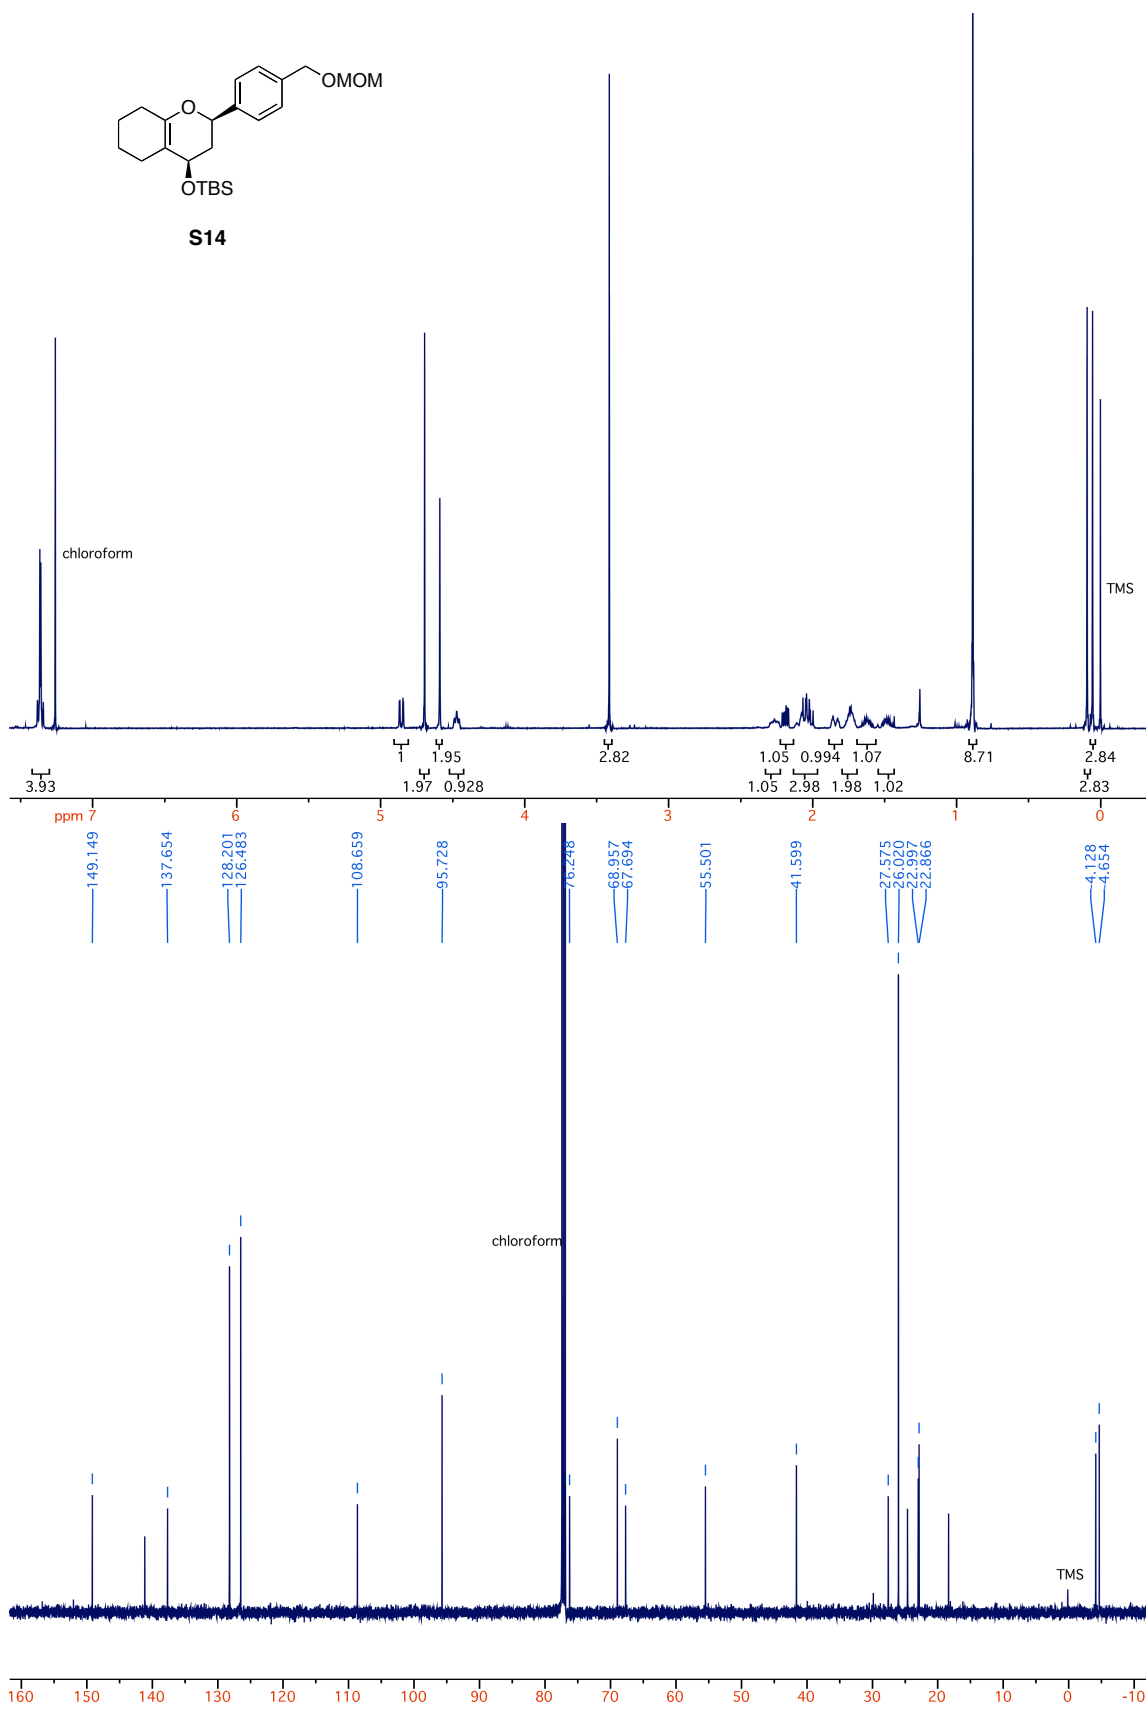

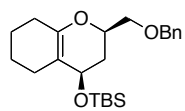**S15**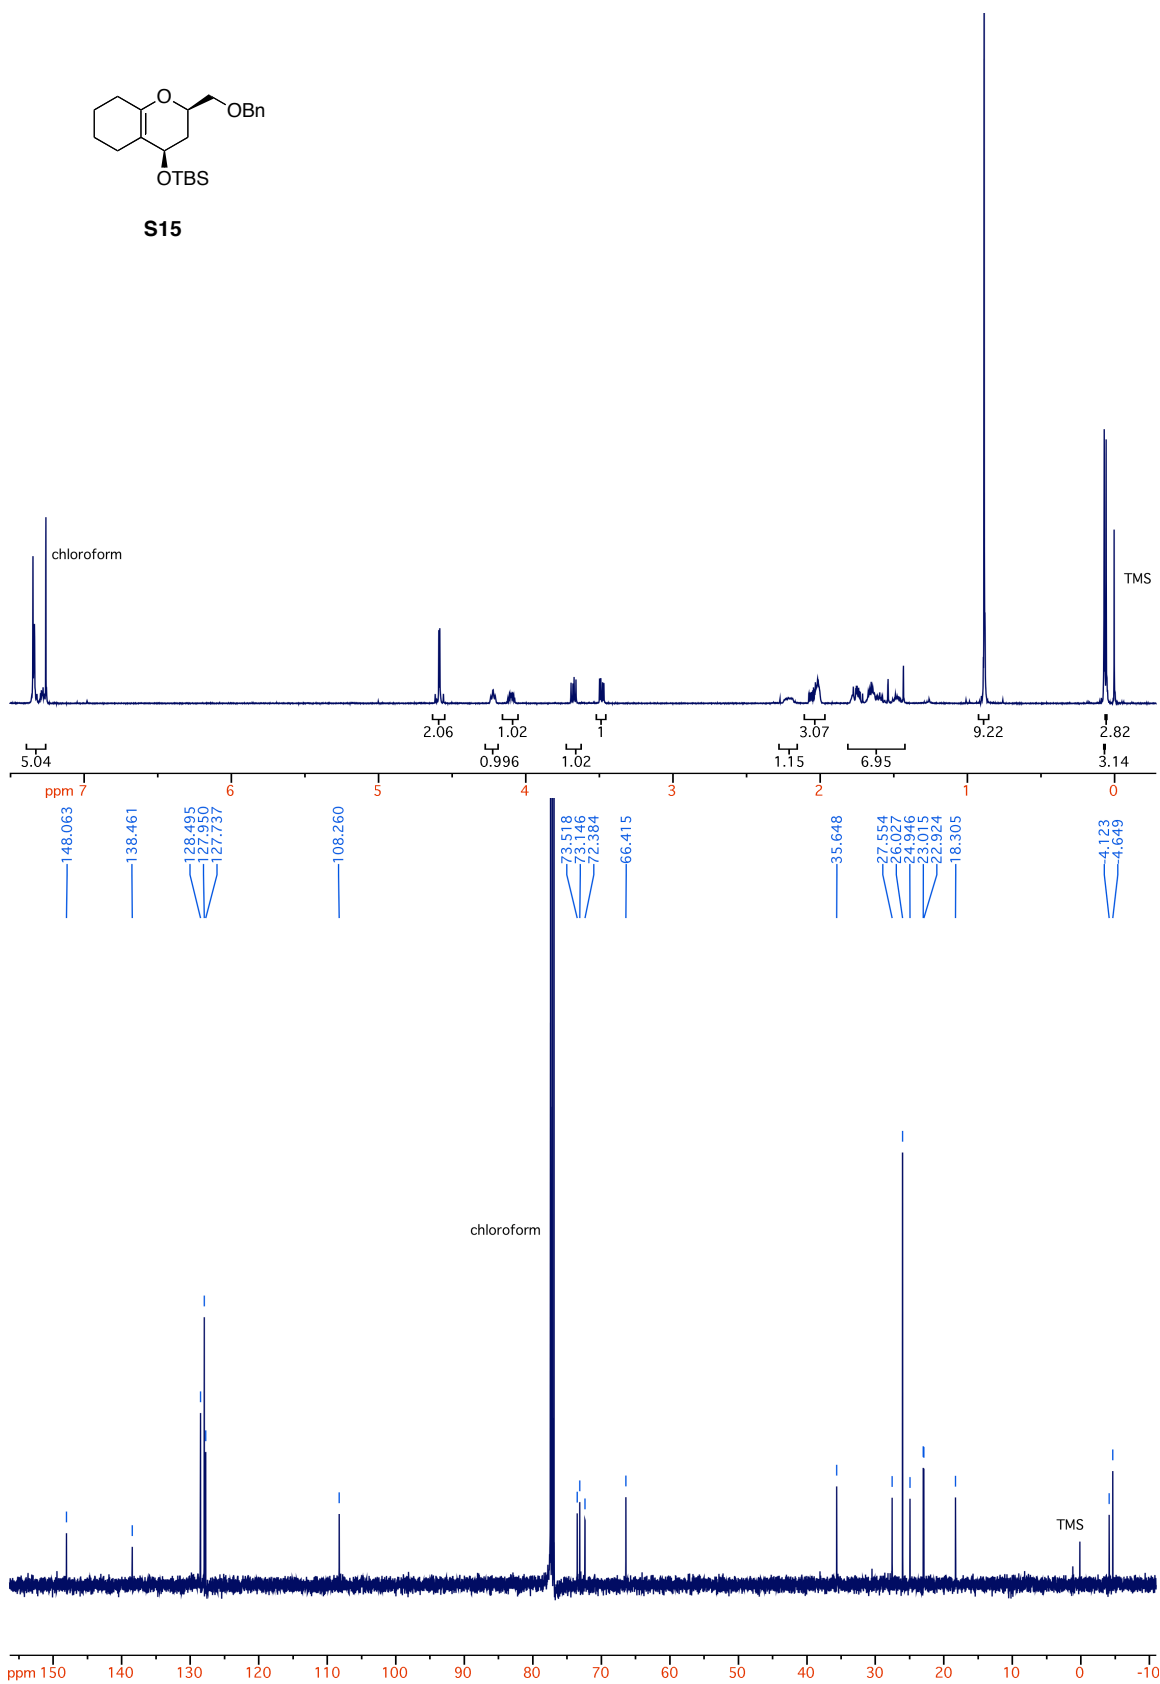

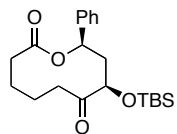**15a**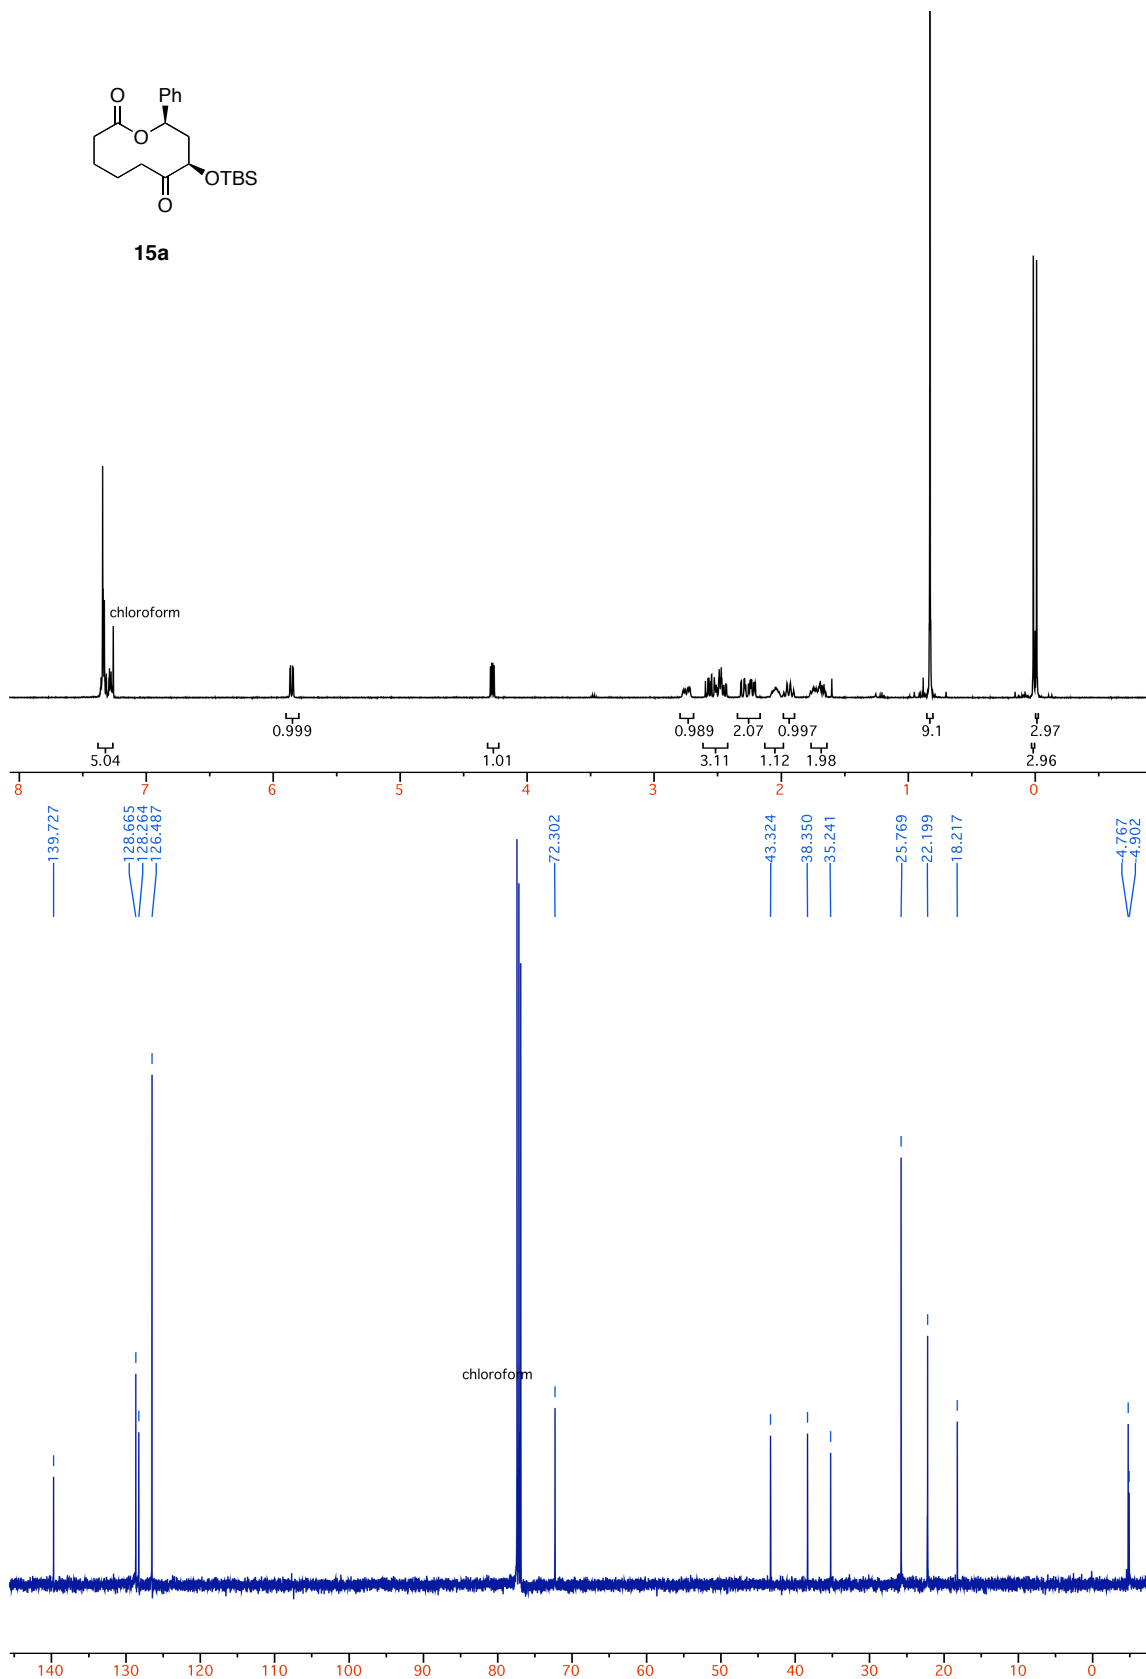



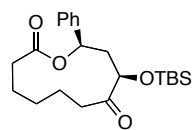**15b**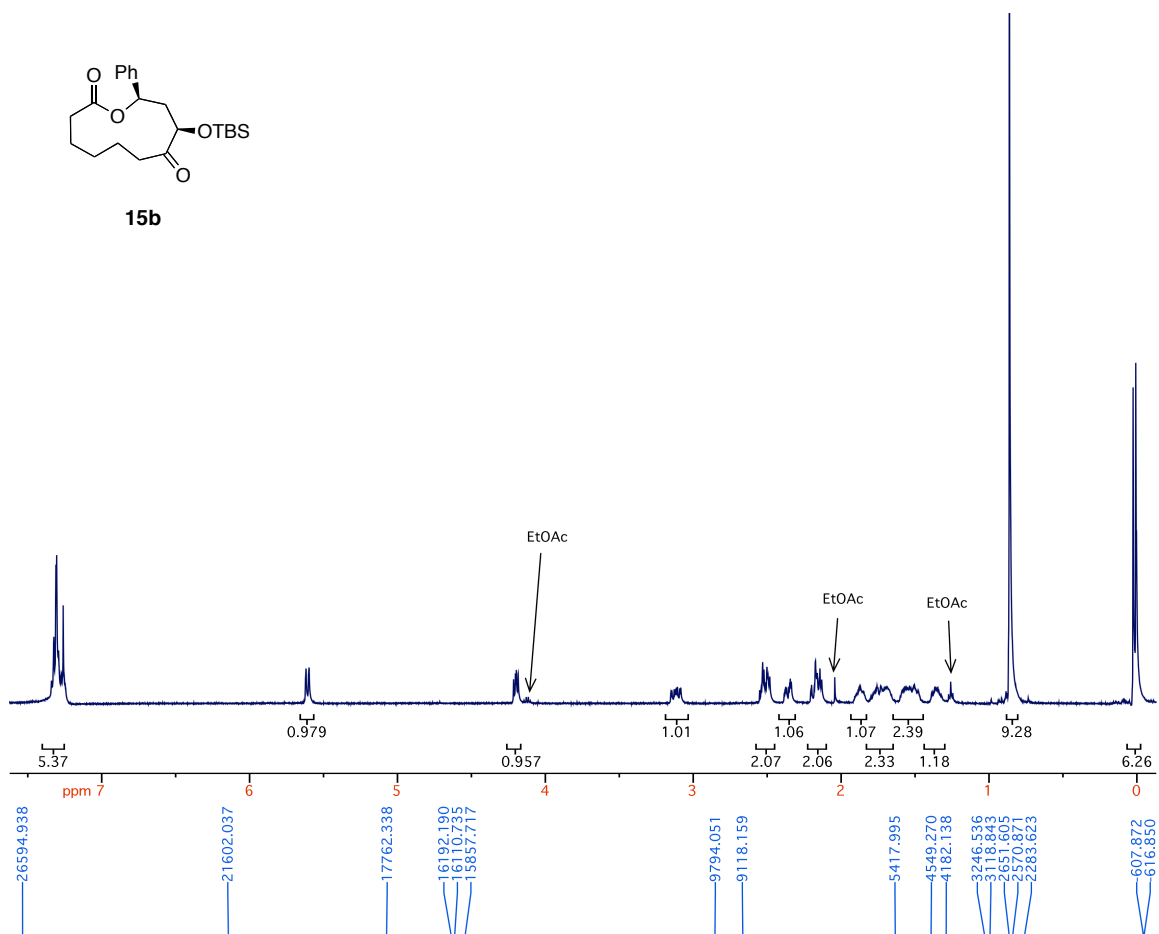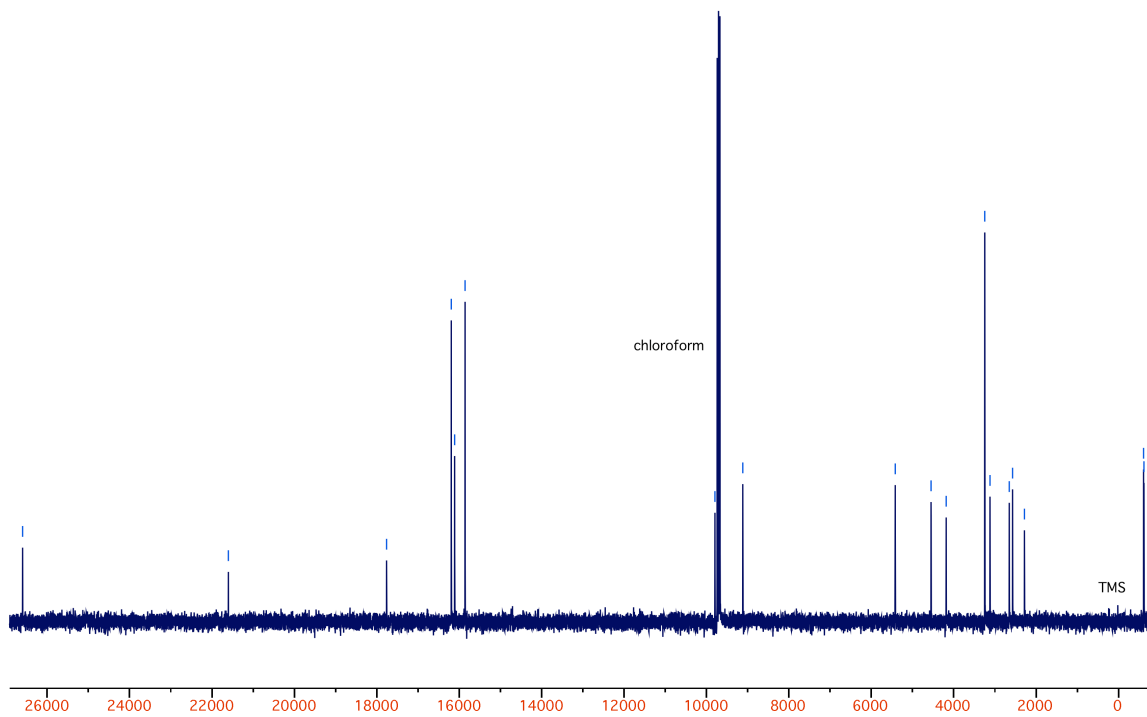

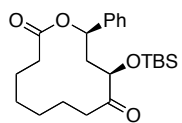**15c**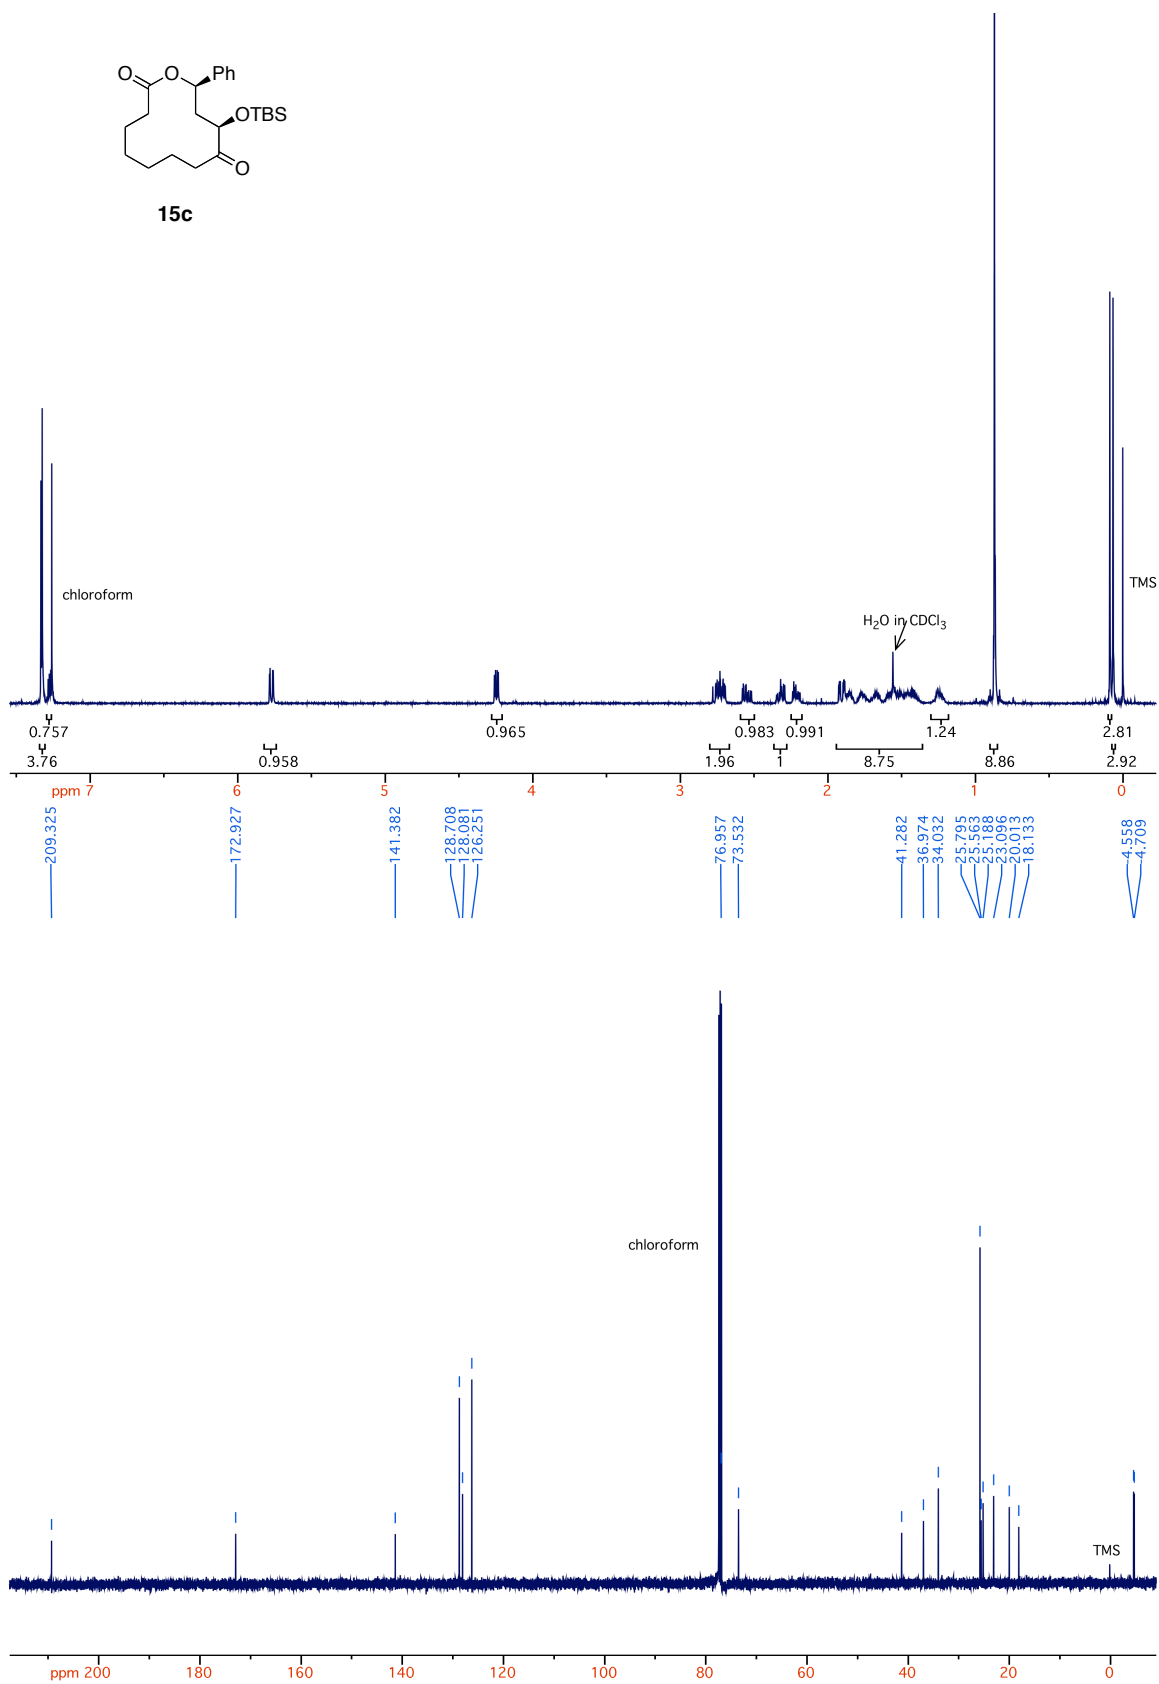

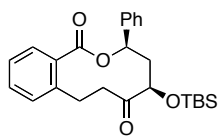**15d**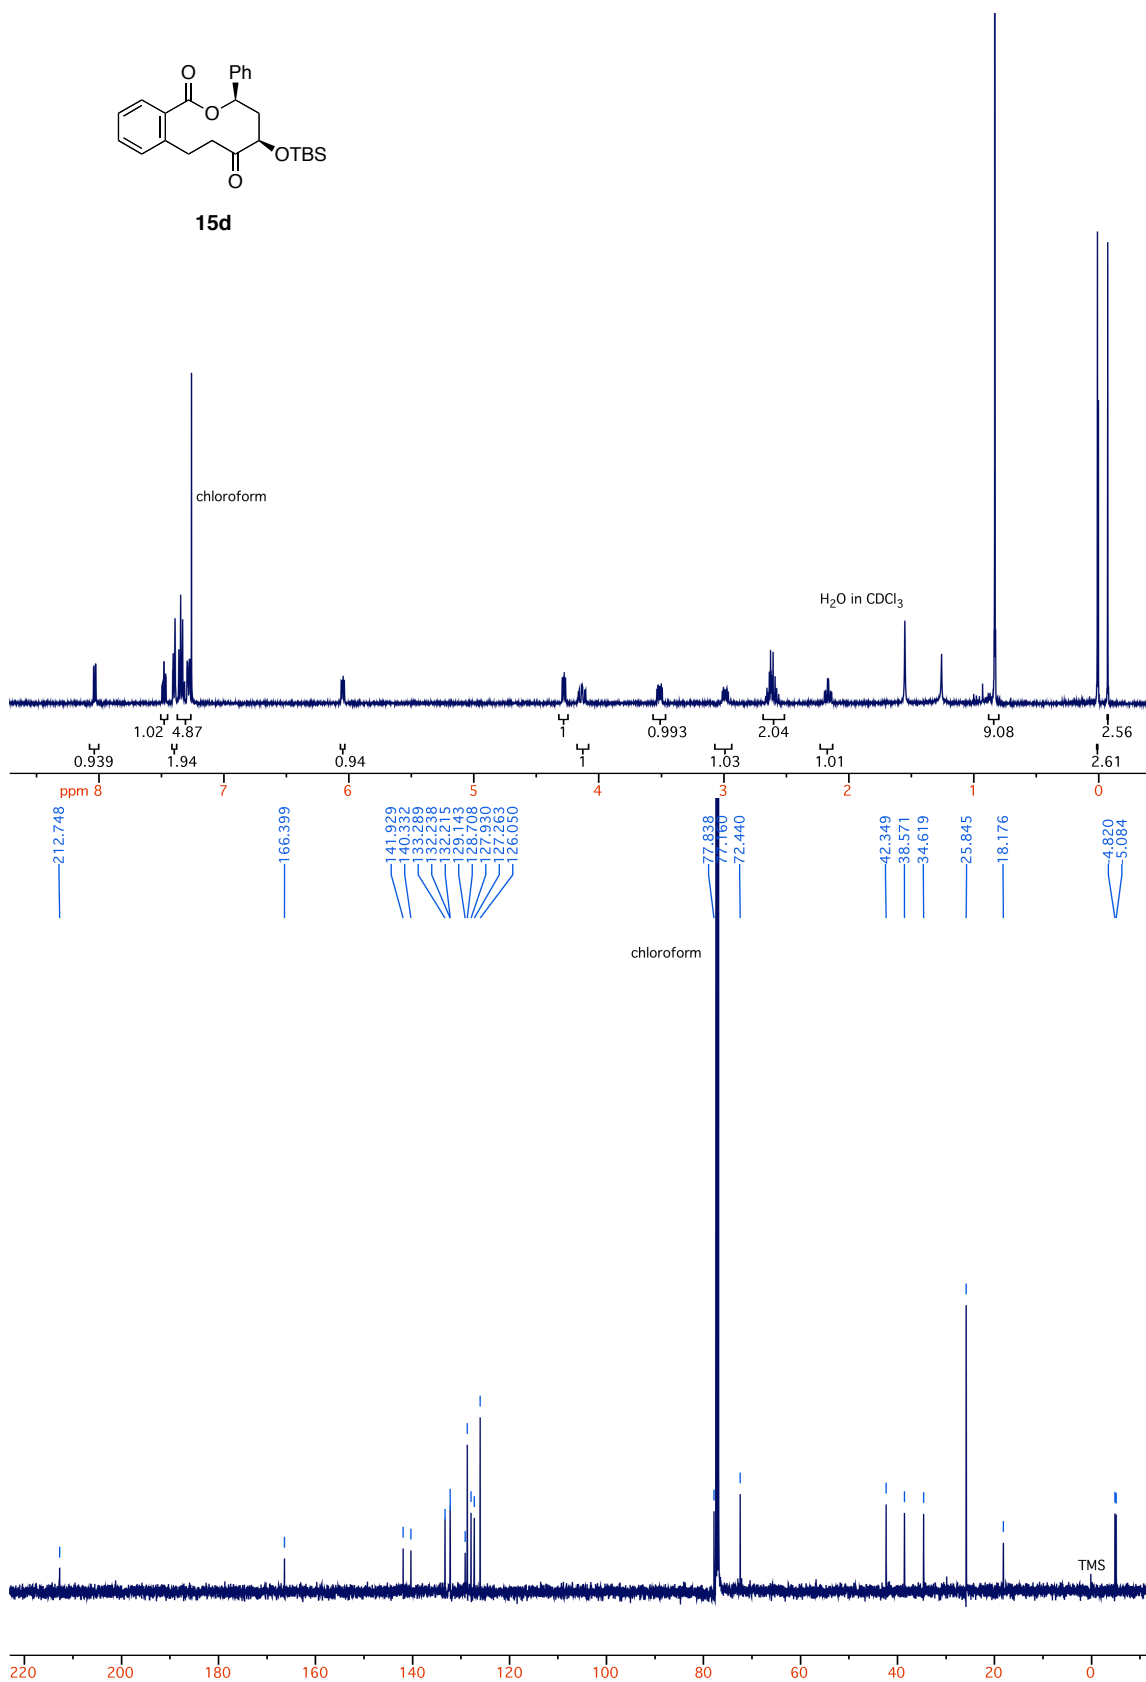







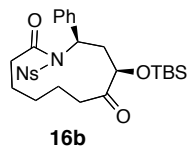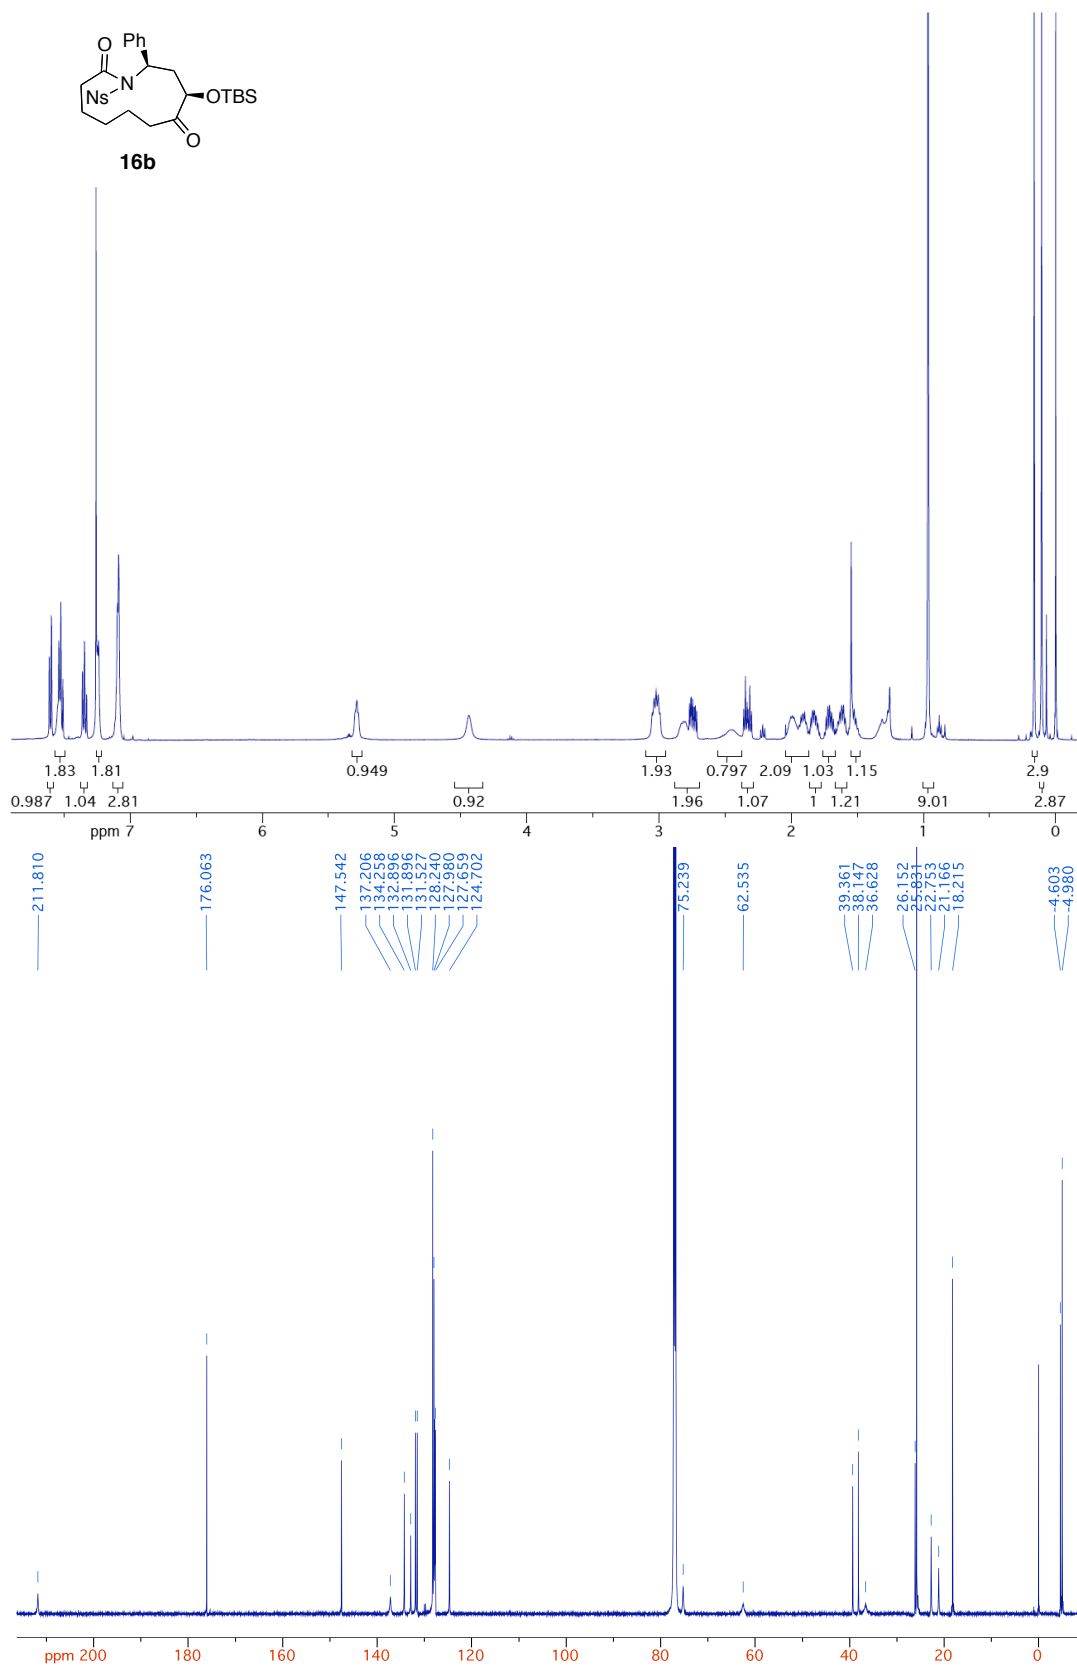

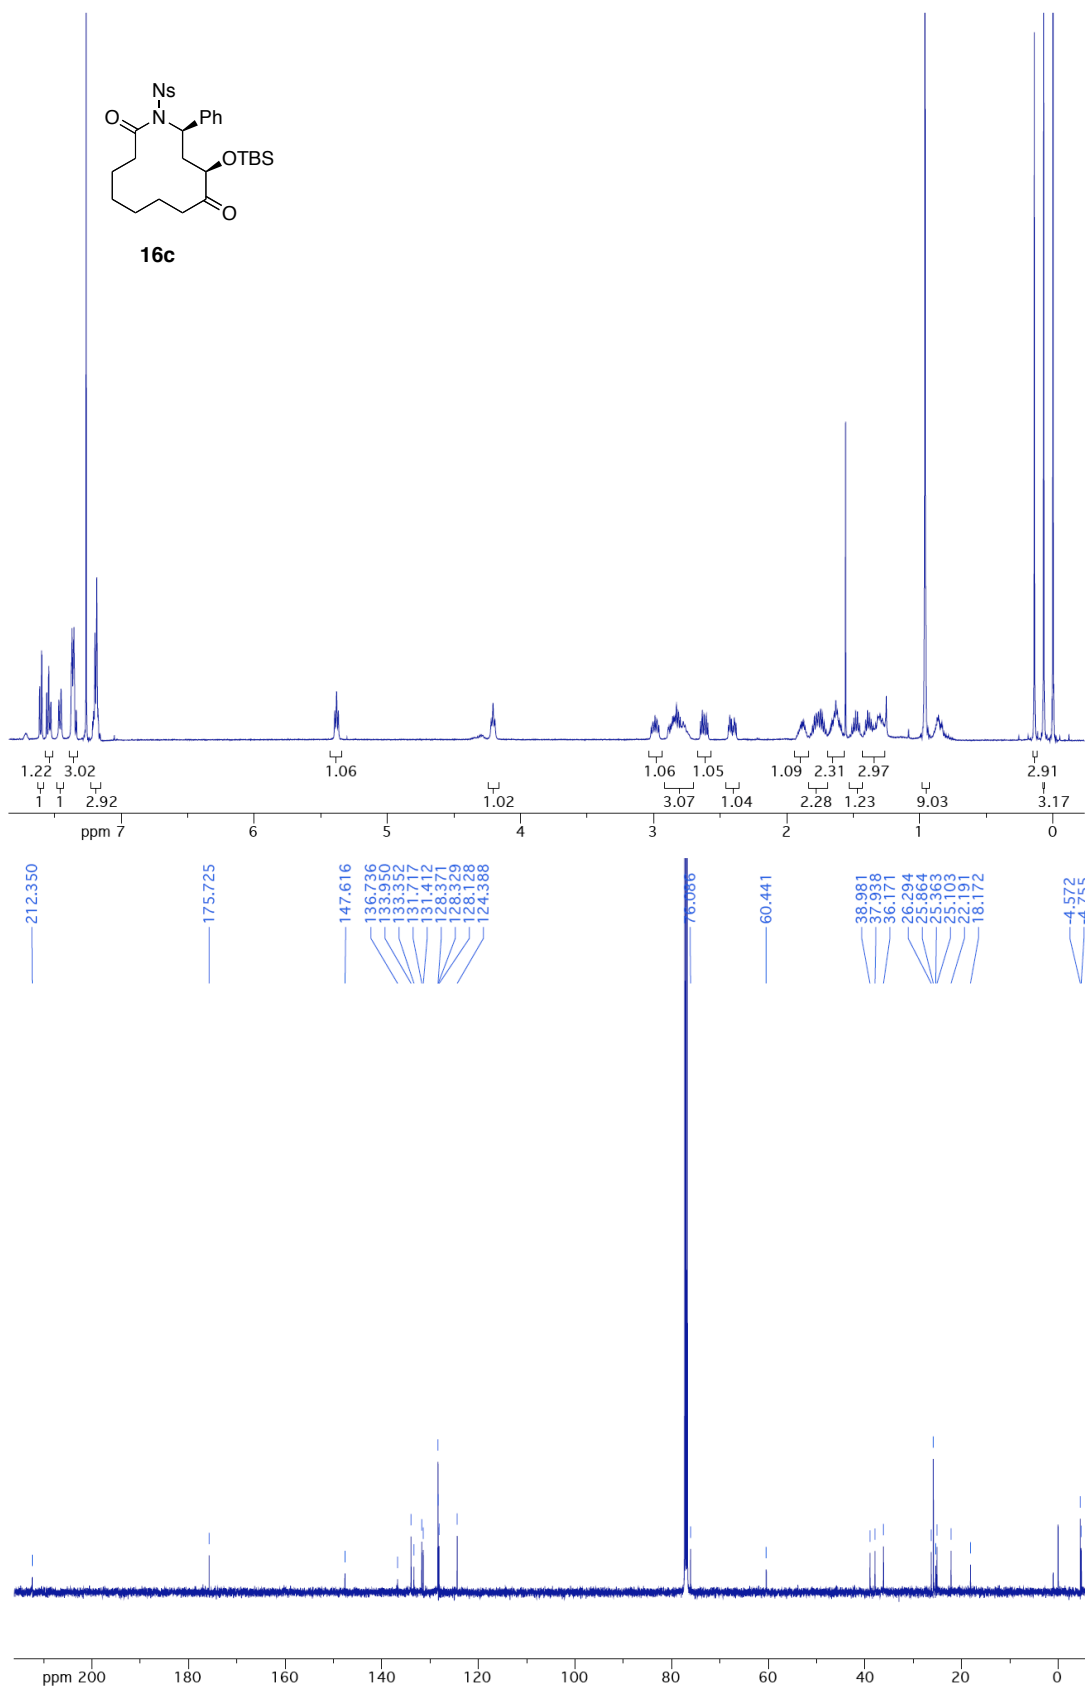



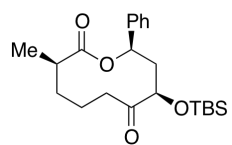

17

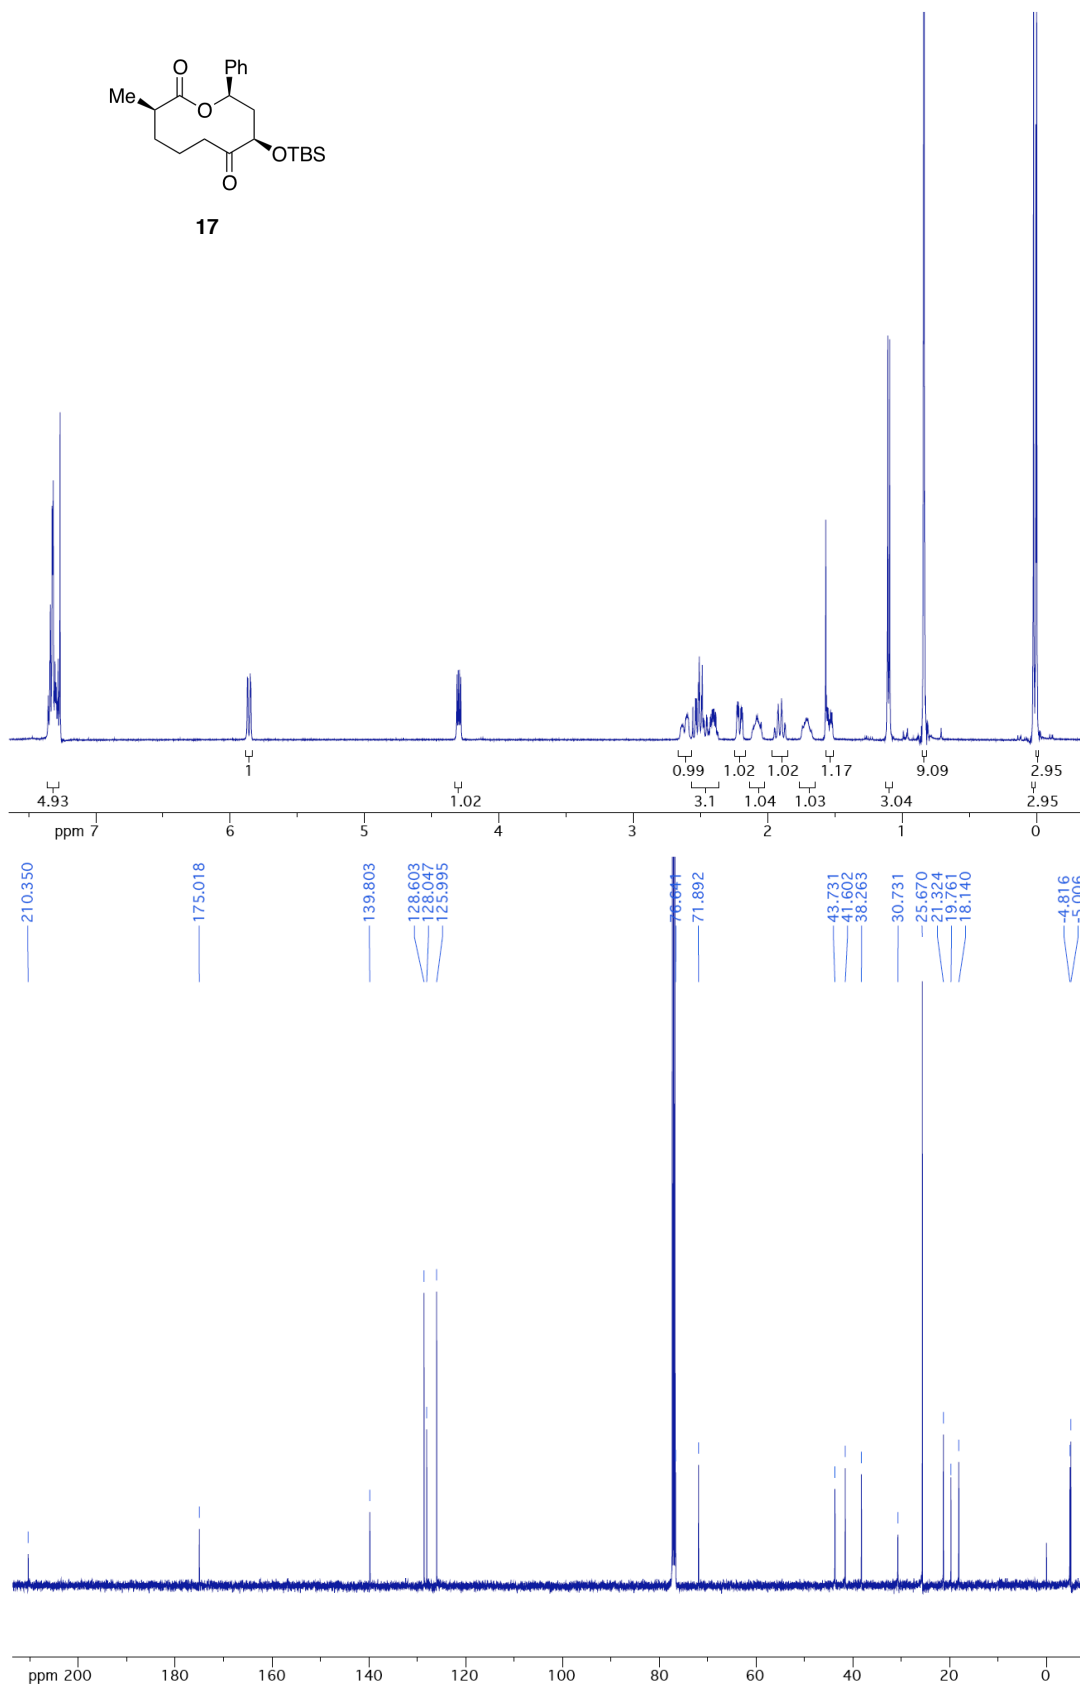

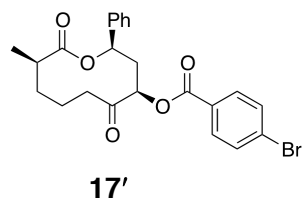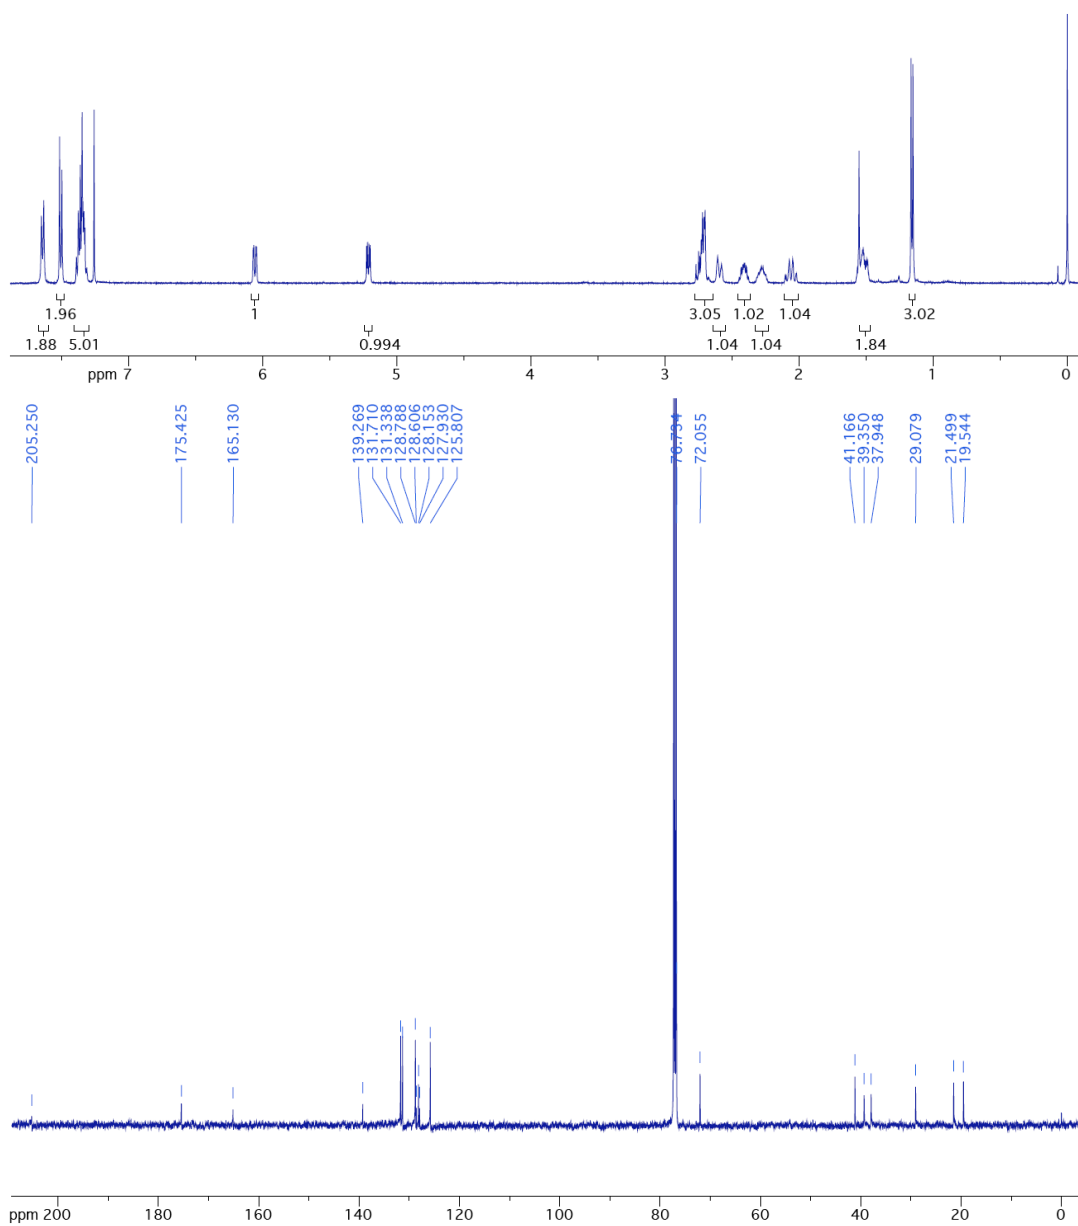

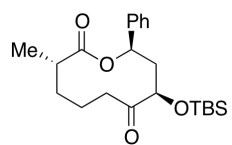**18**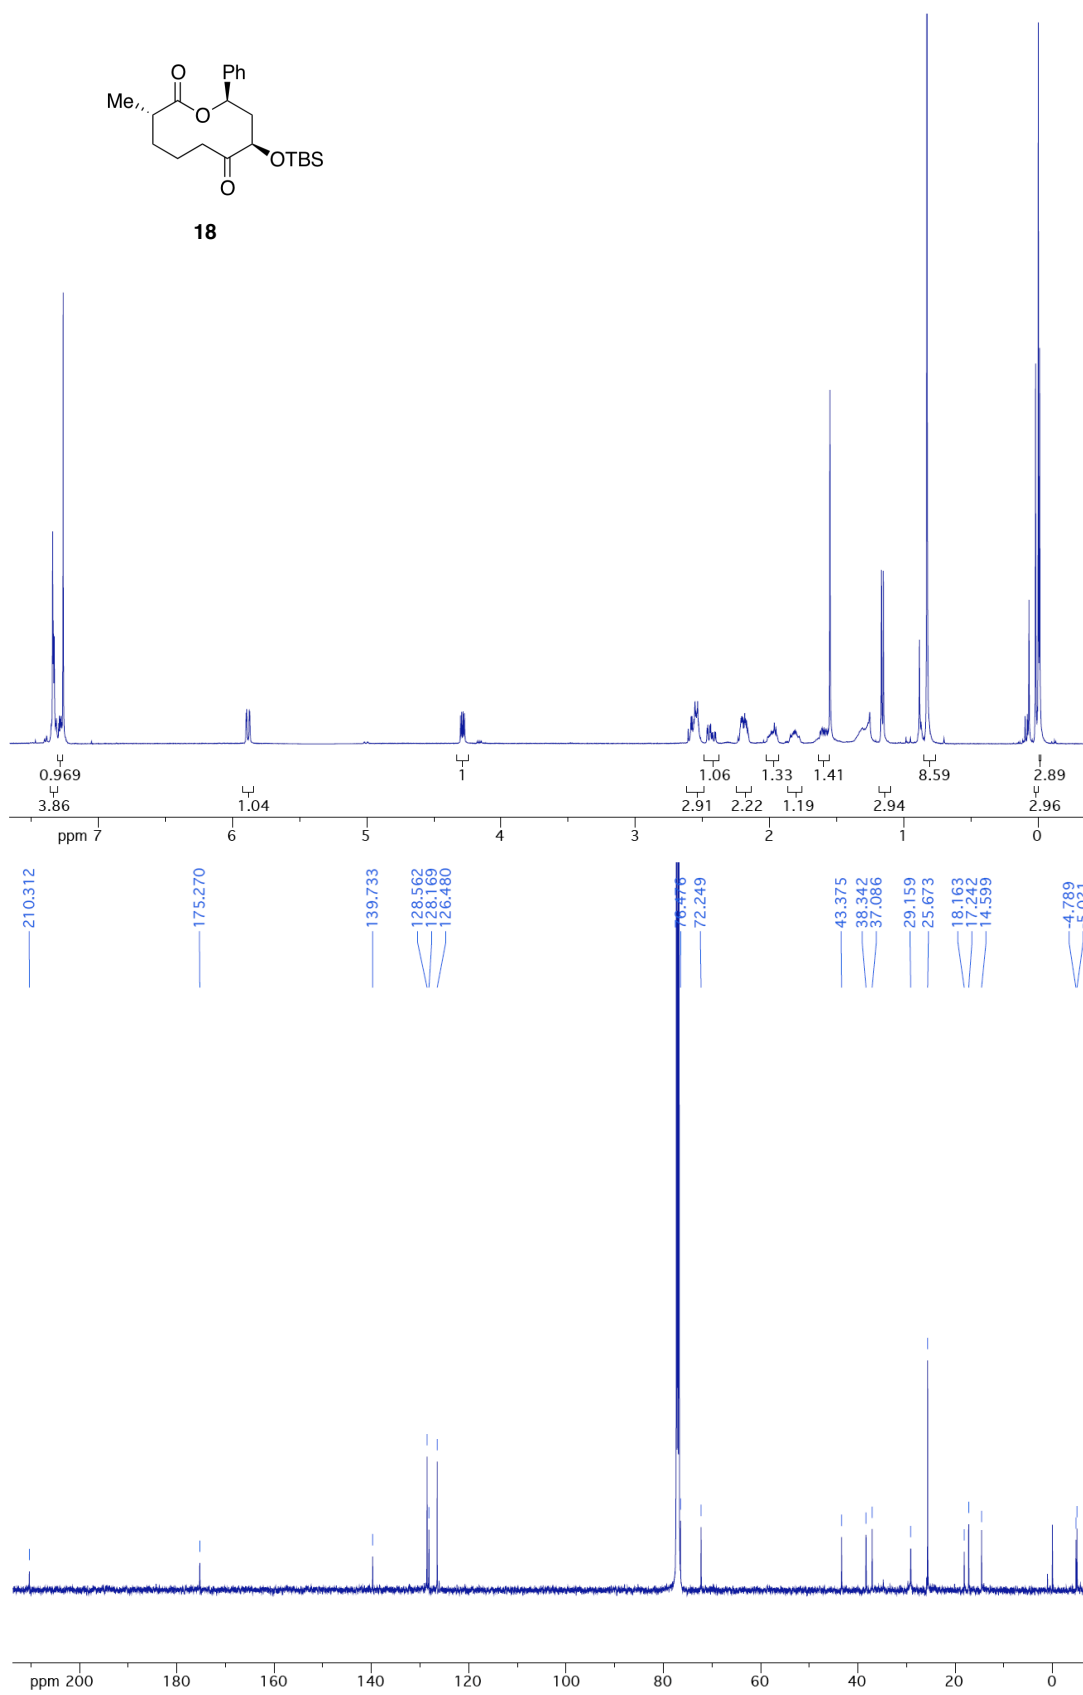

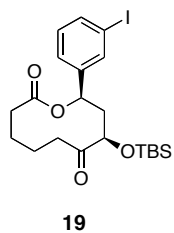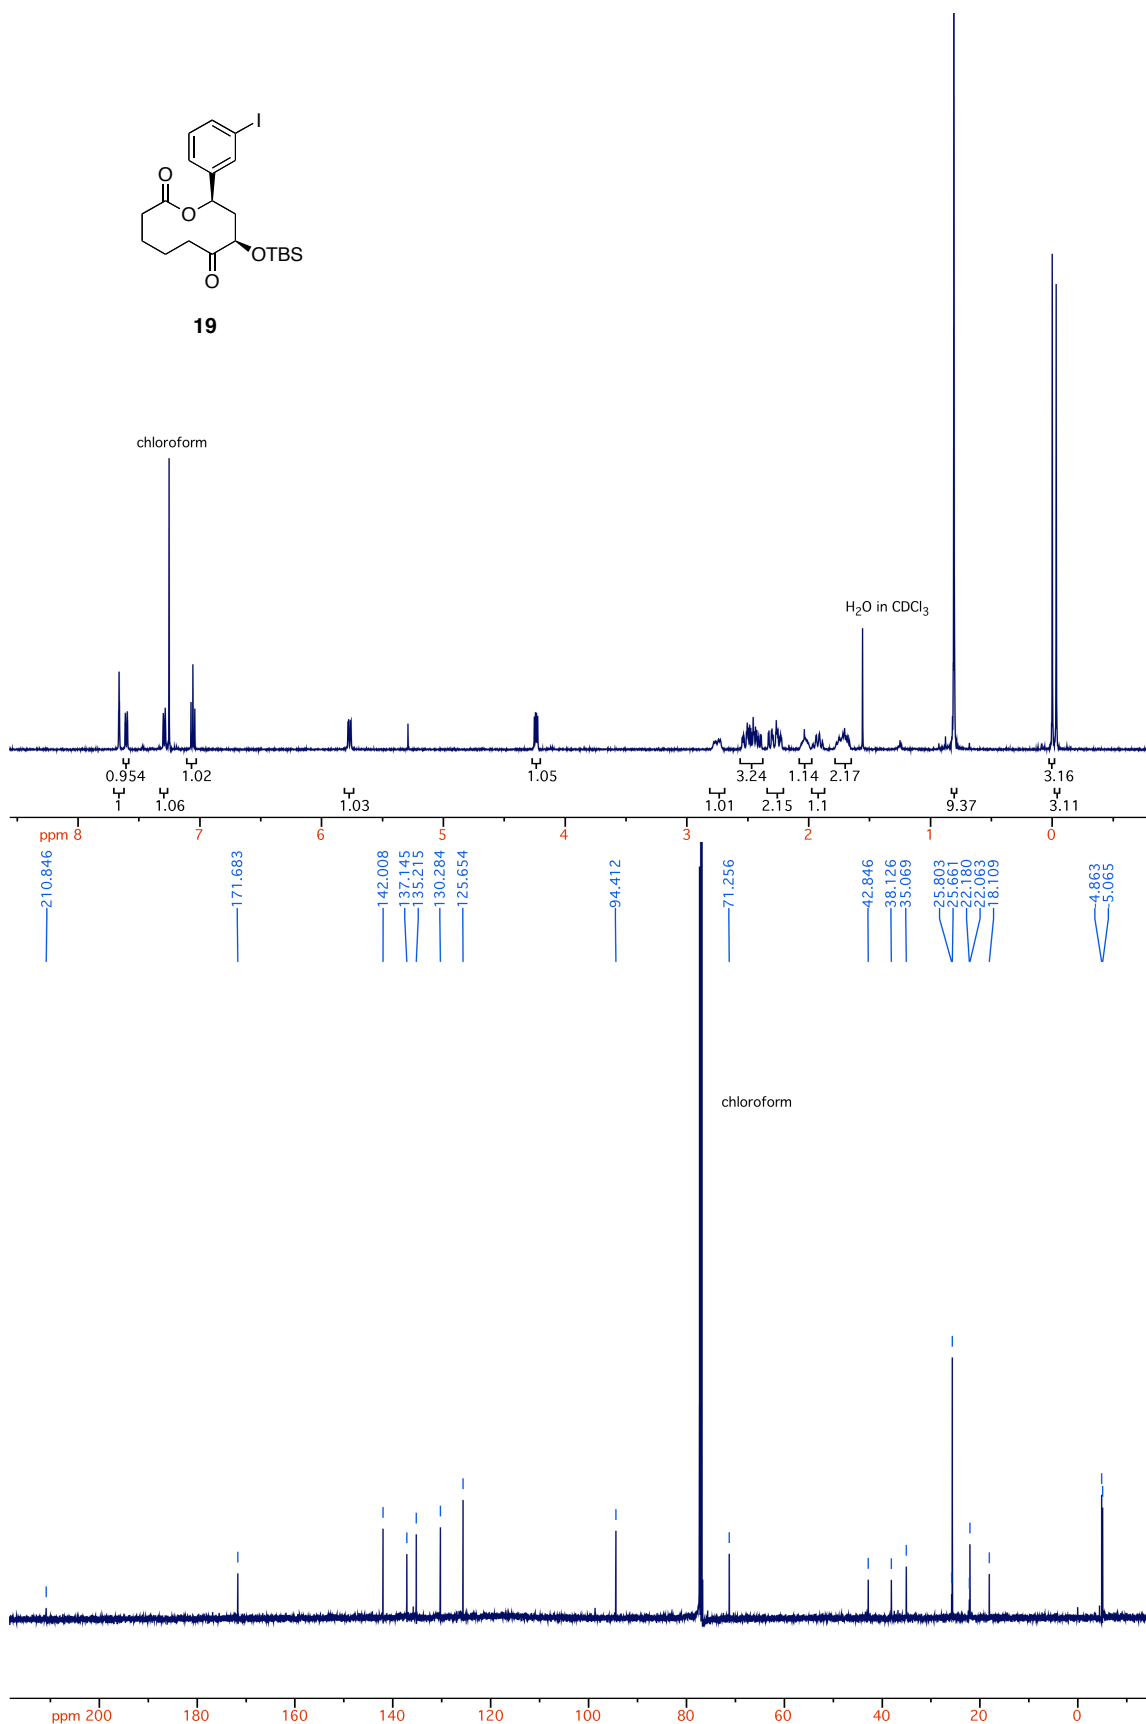



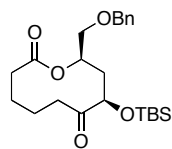**21**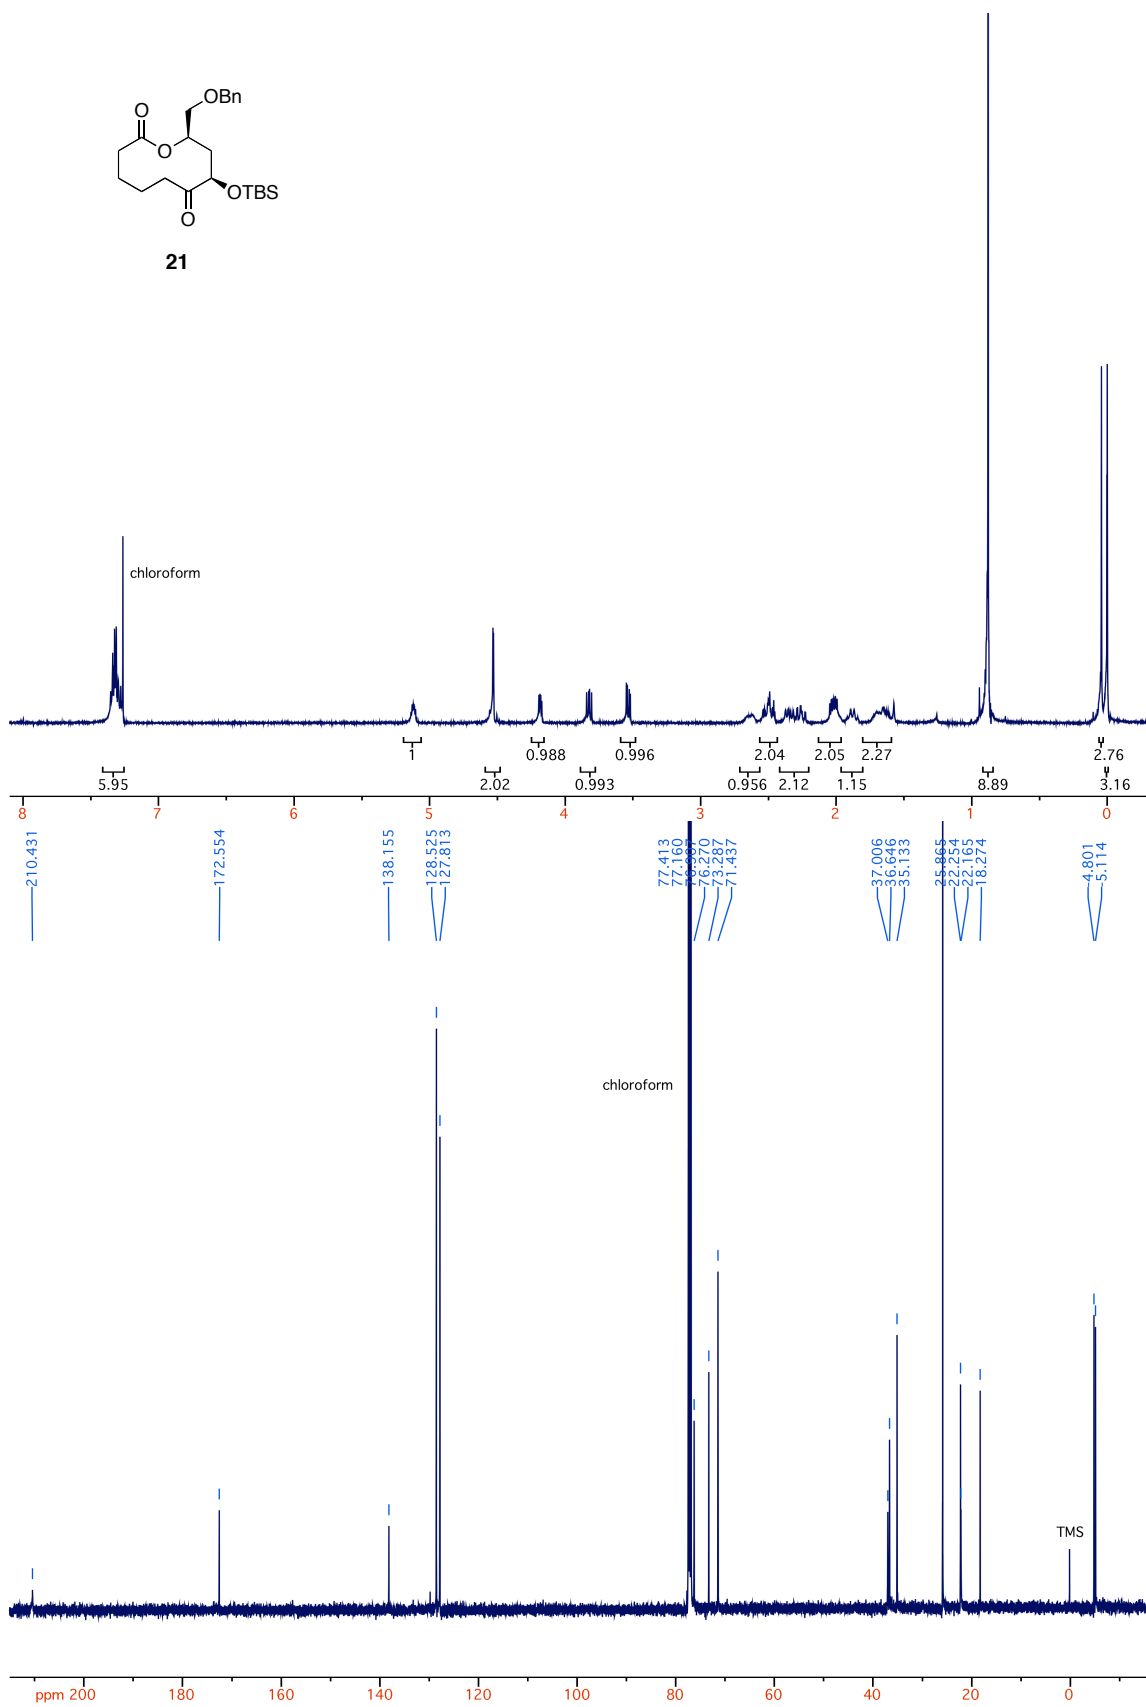

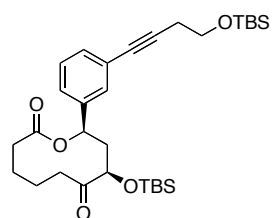**24**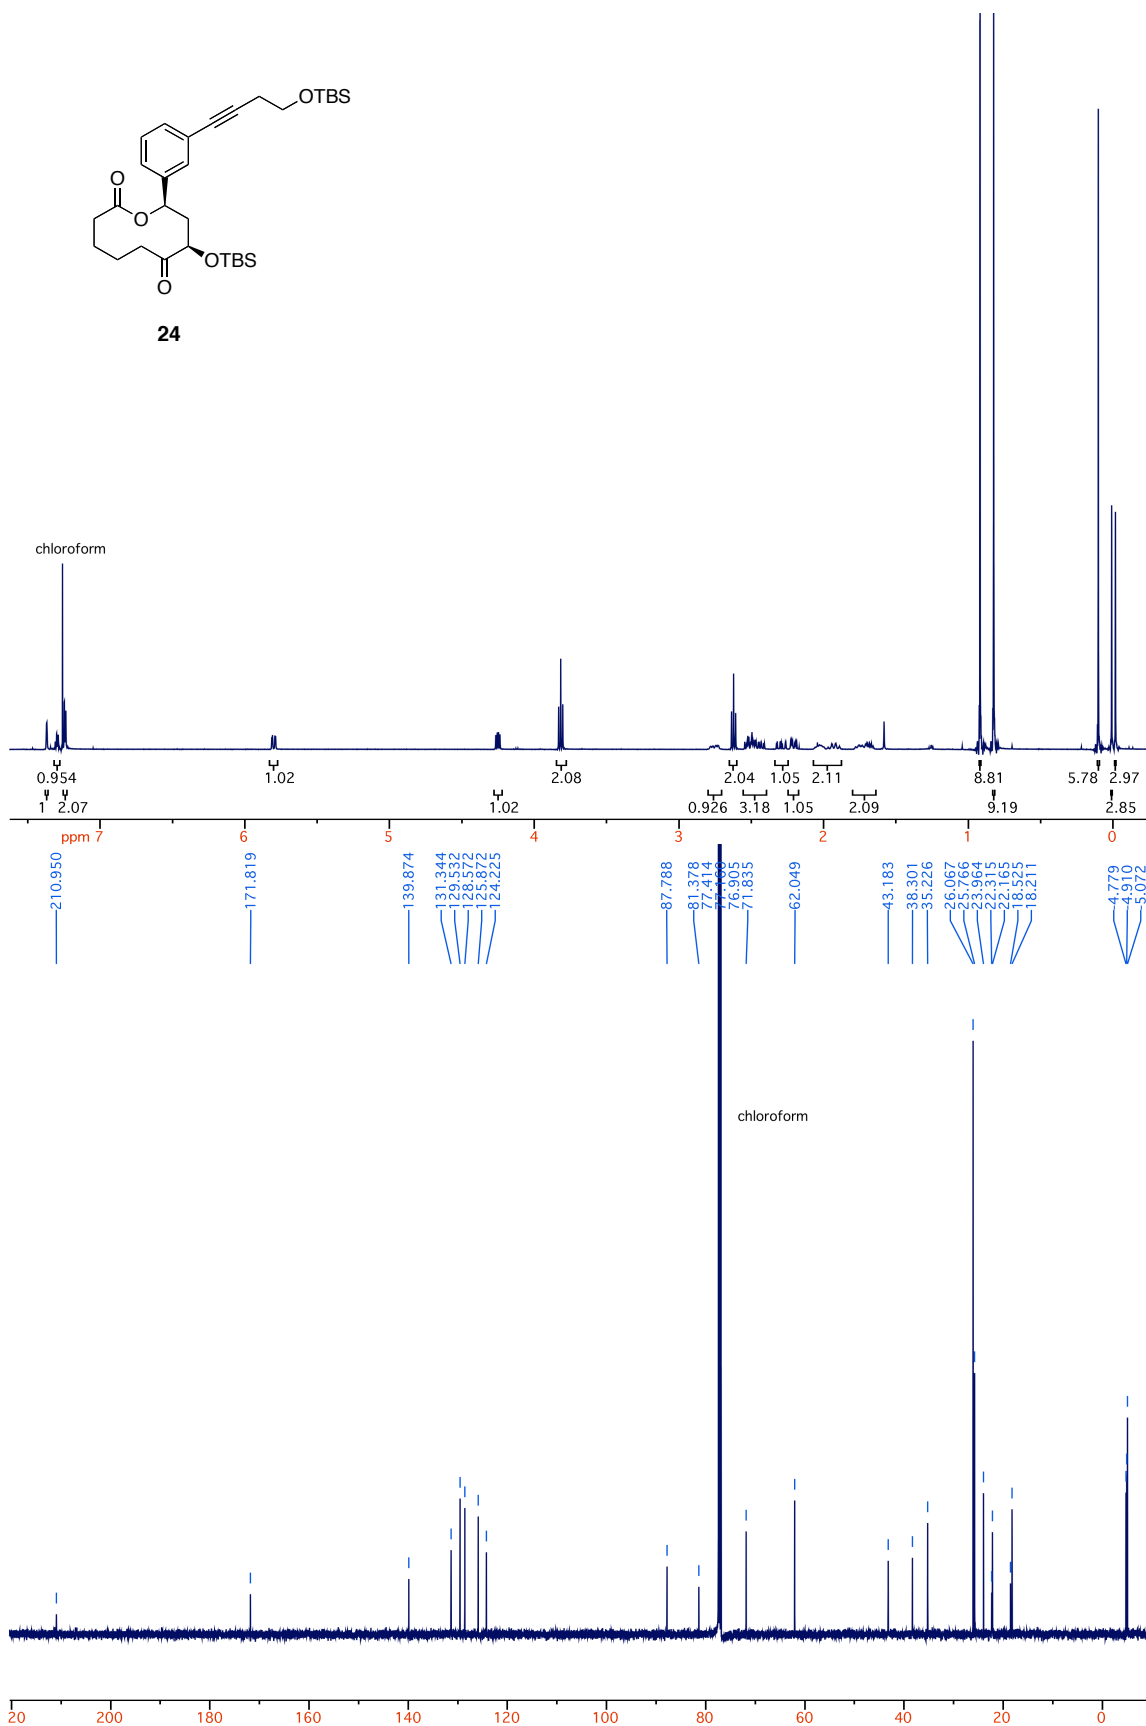

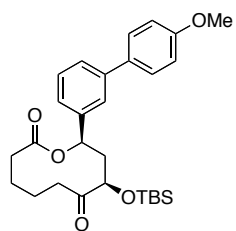**25**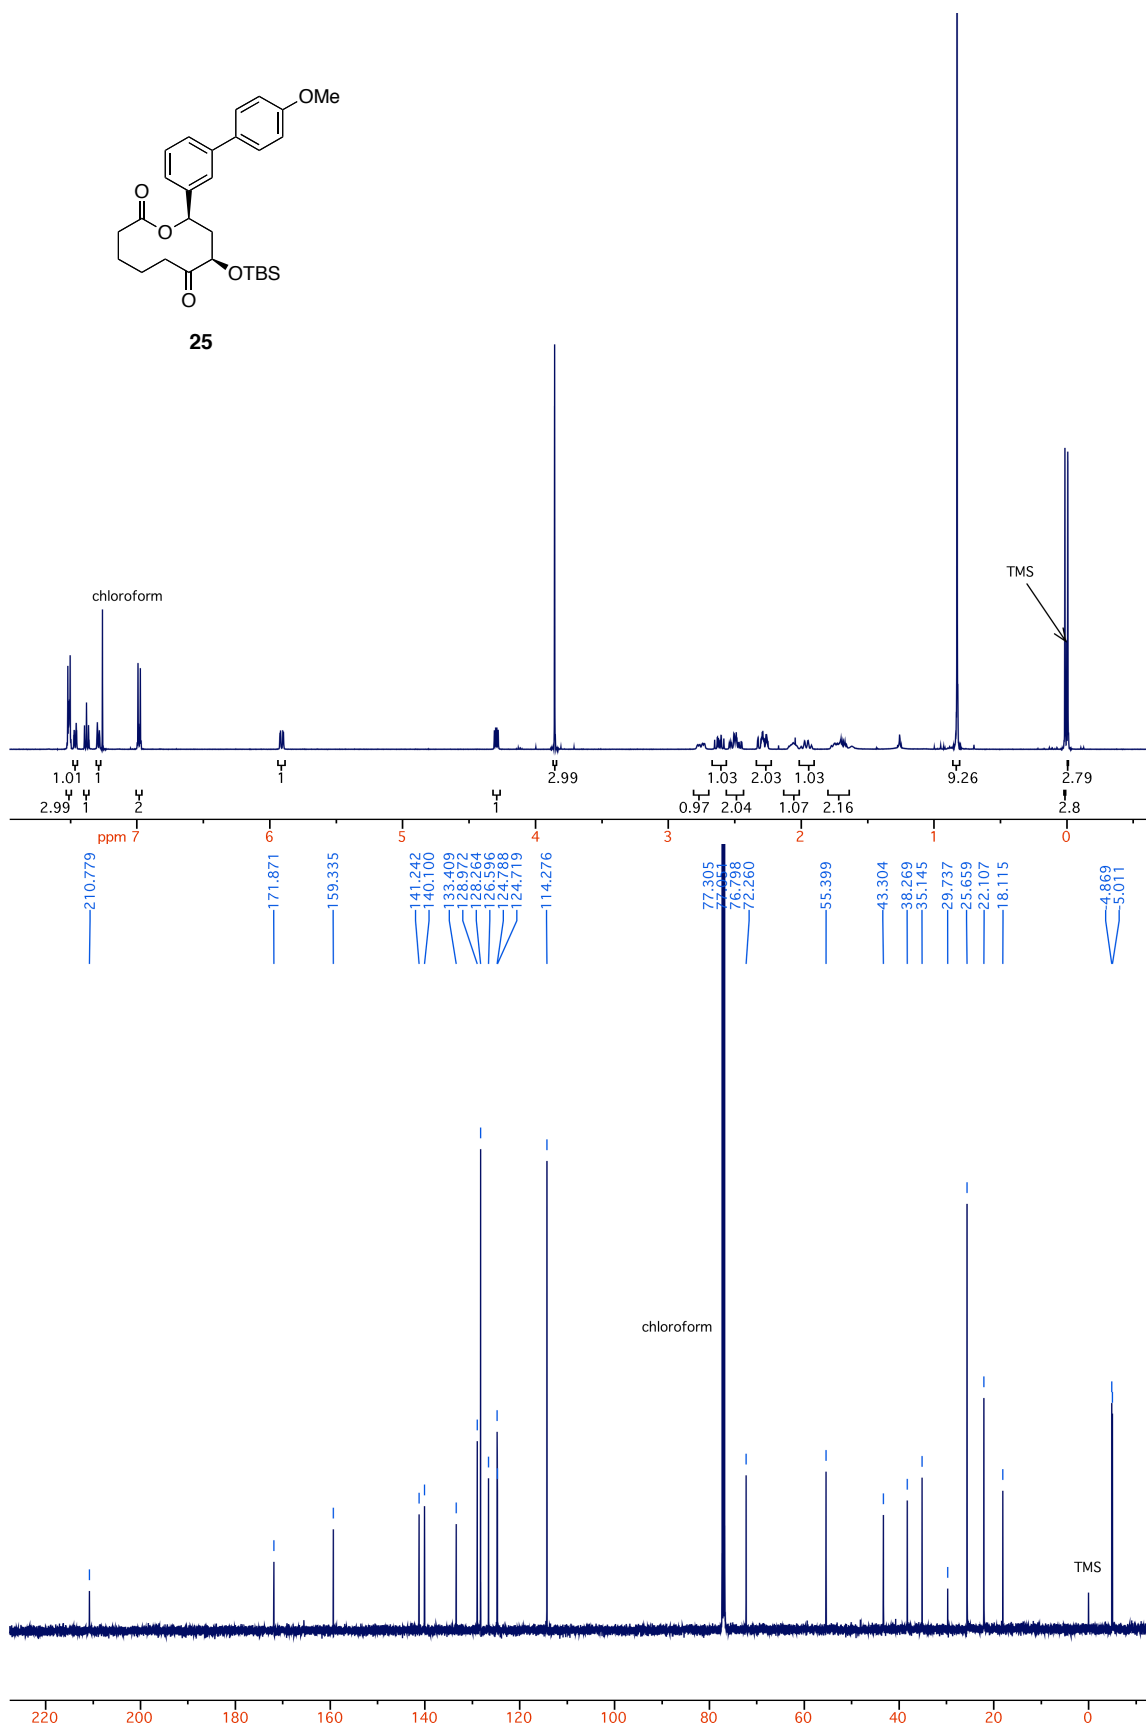



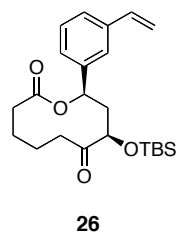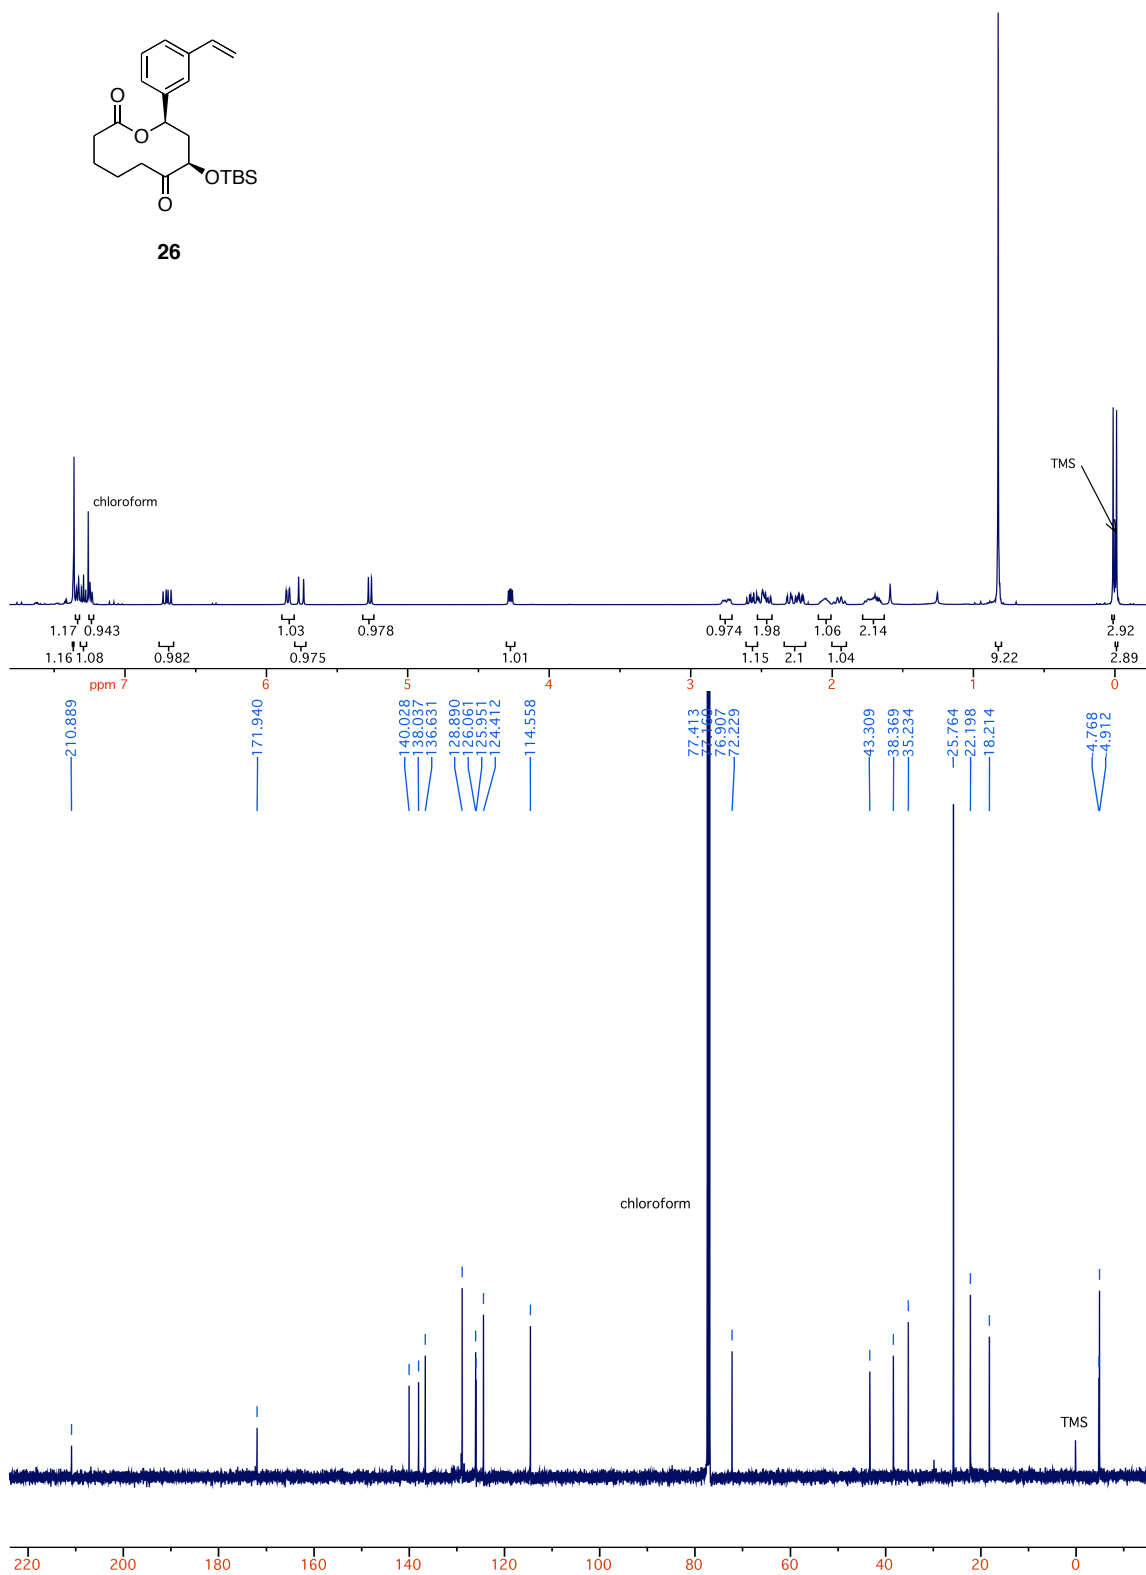



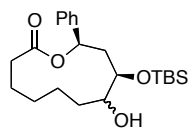

27b-1

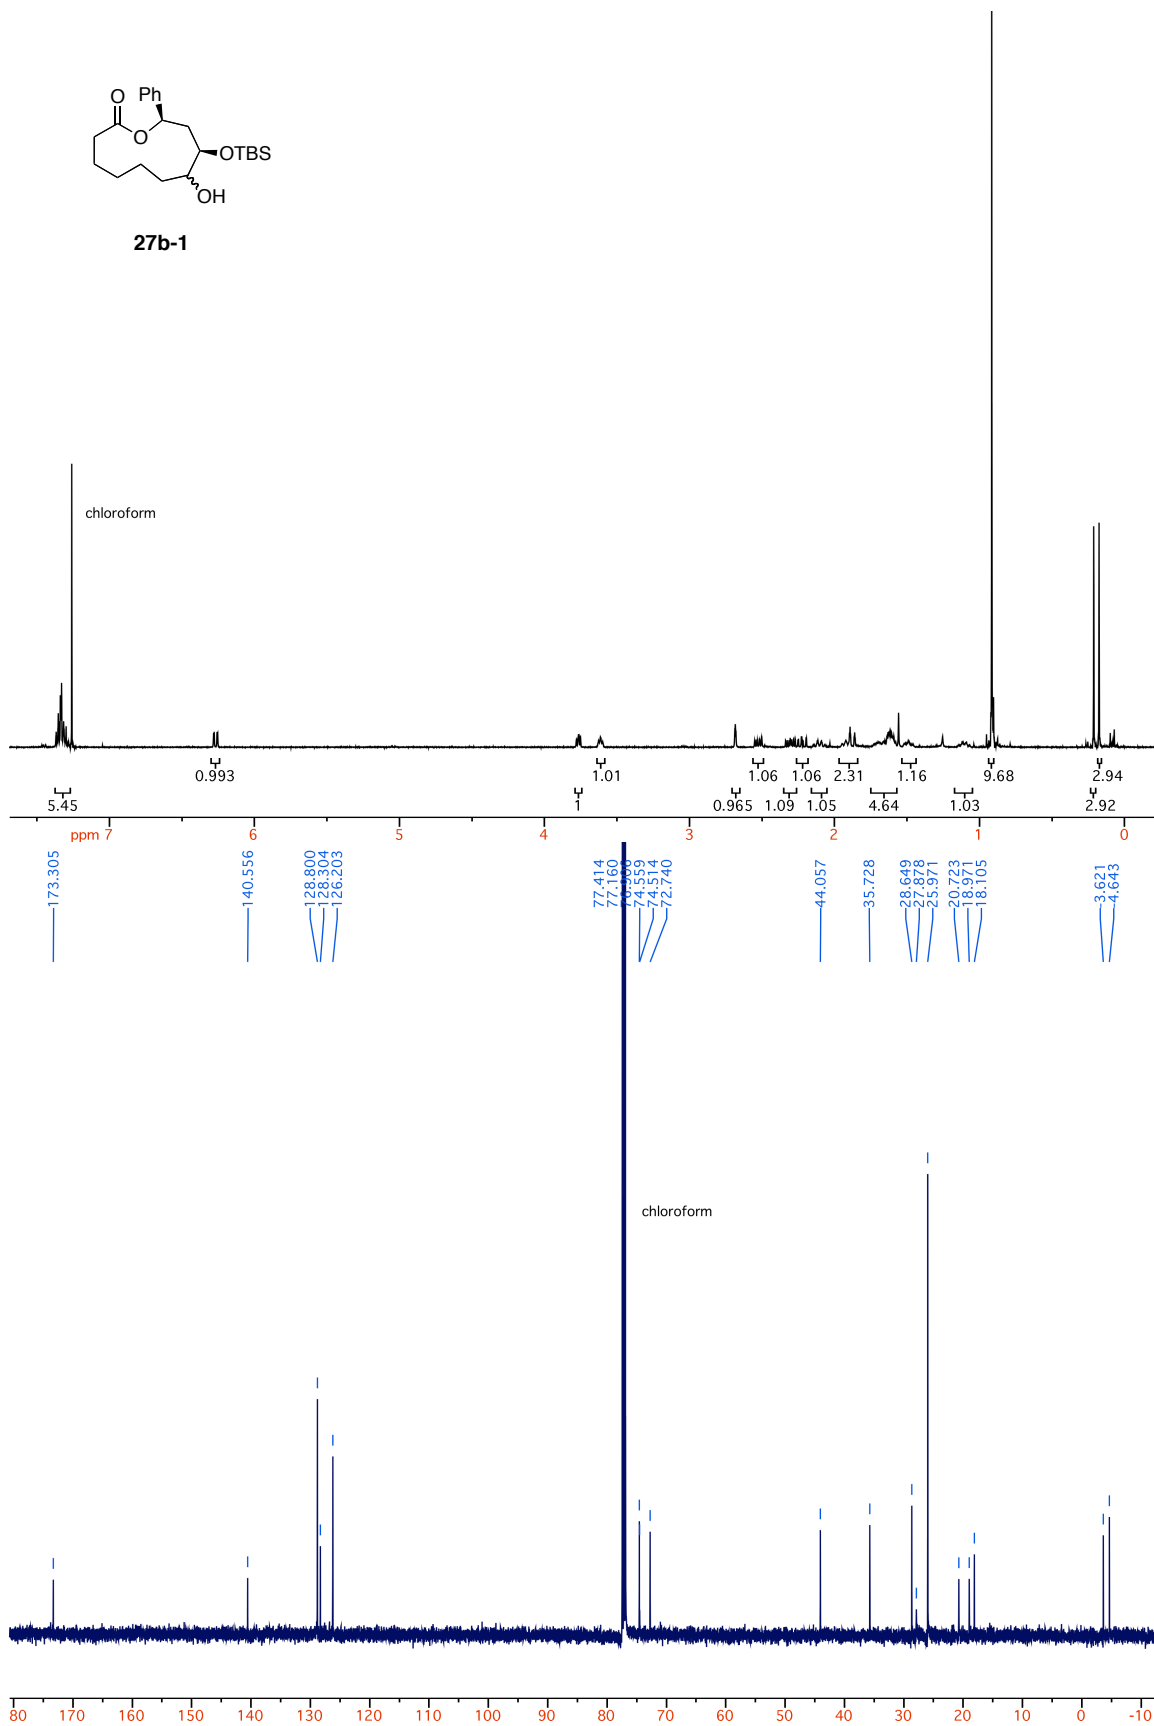

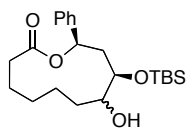**27b-2**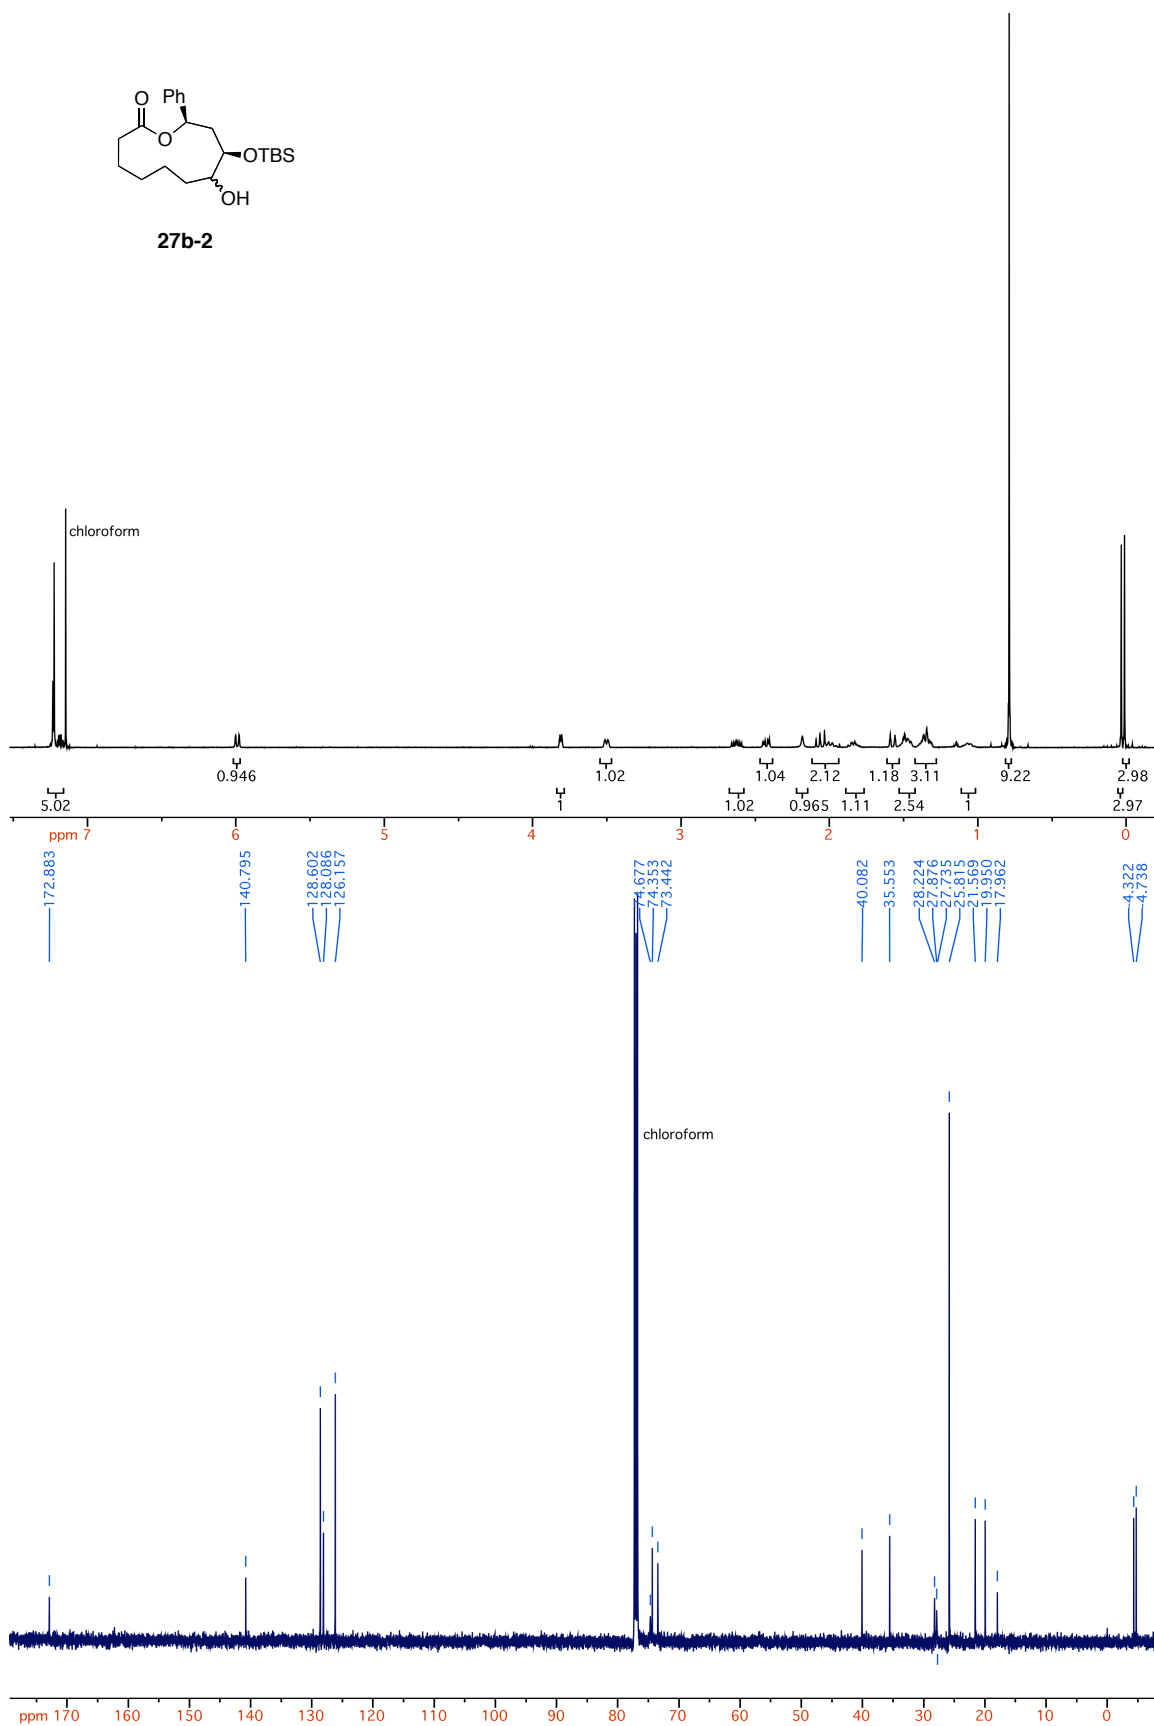

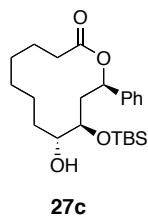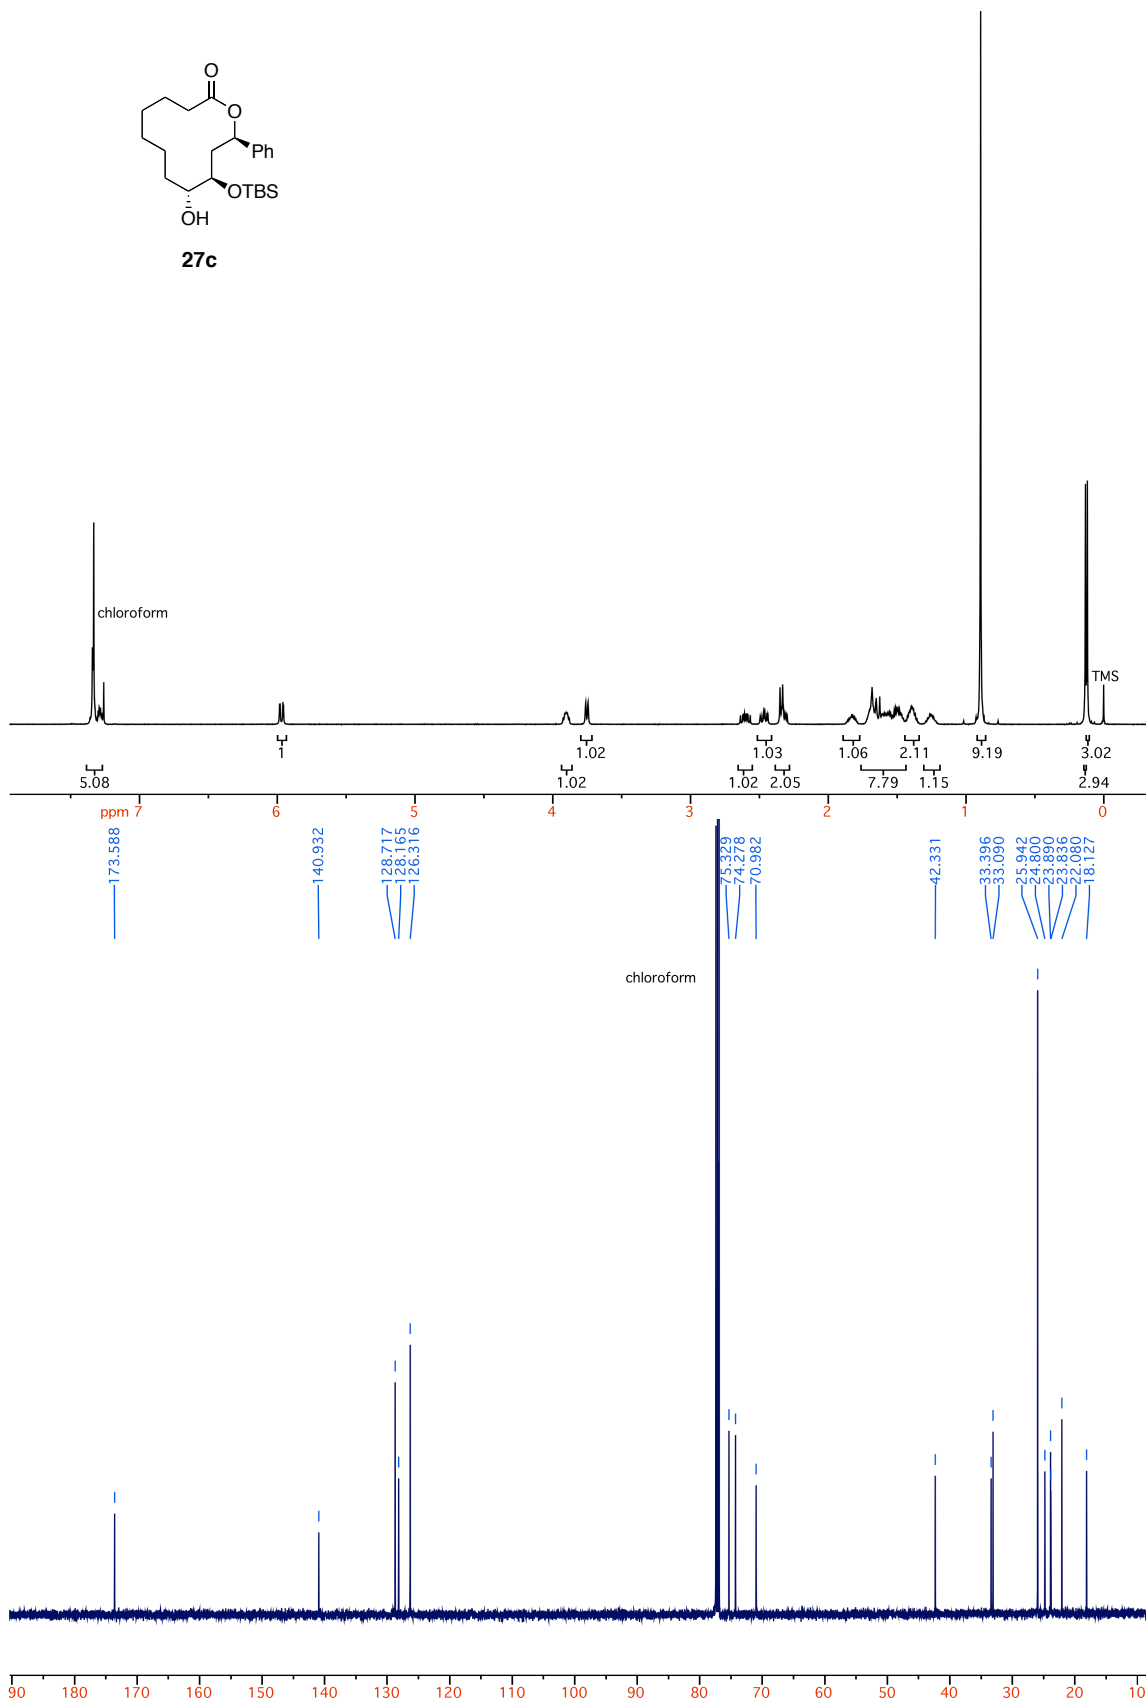

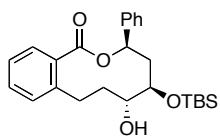**27d**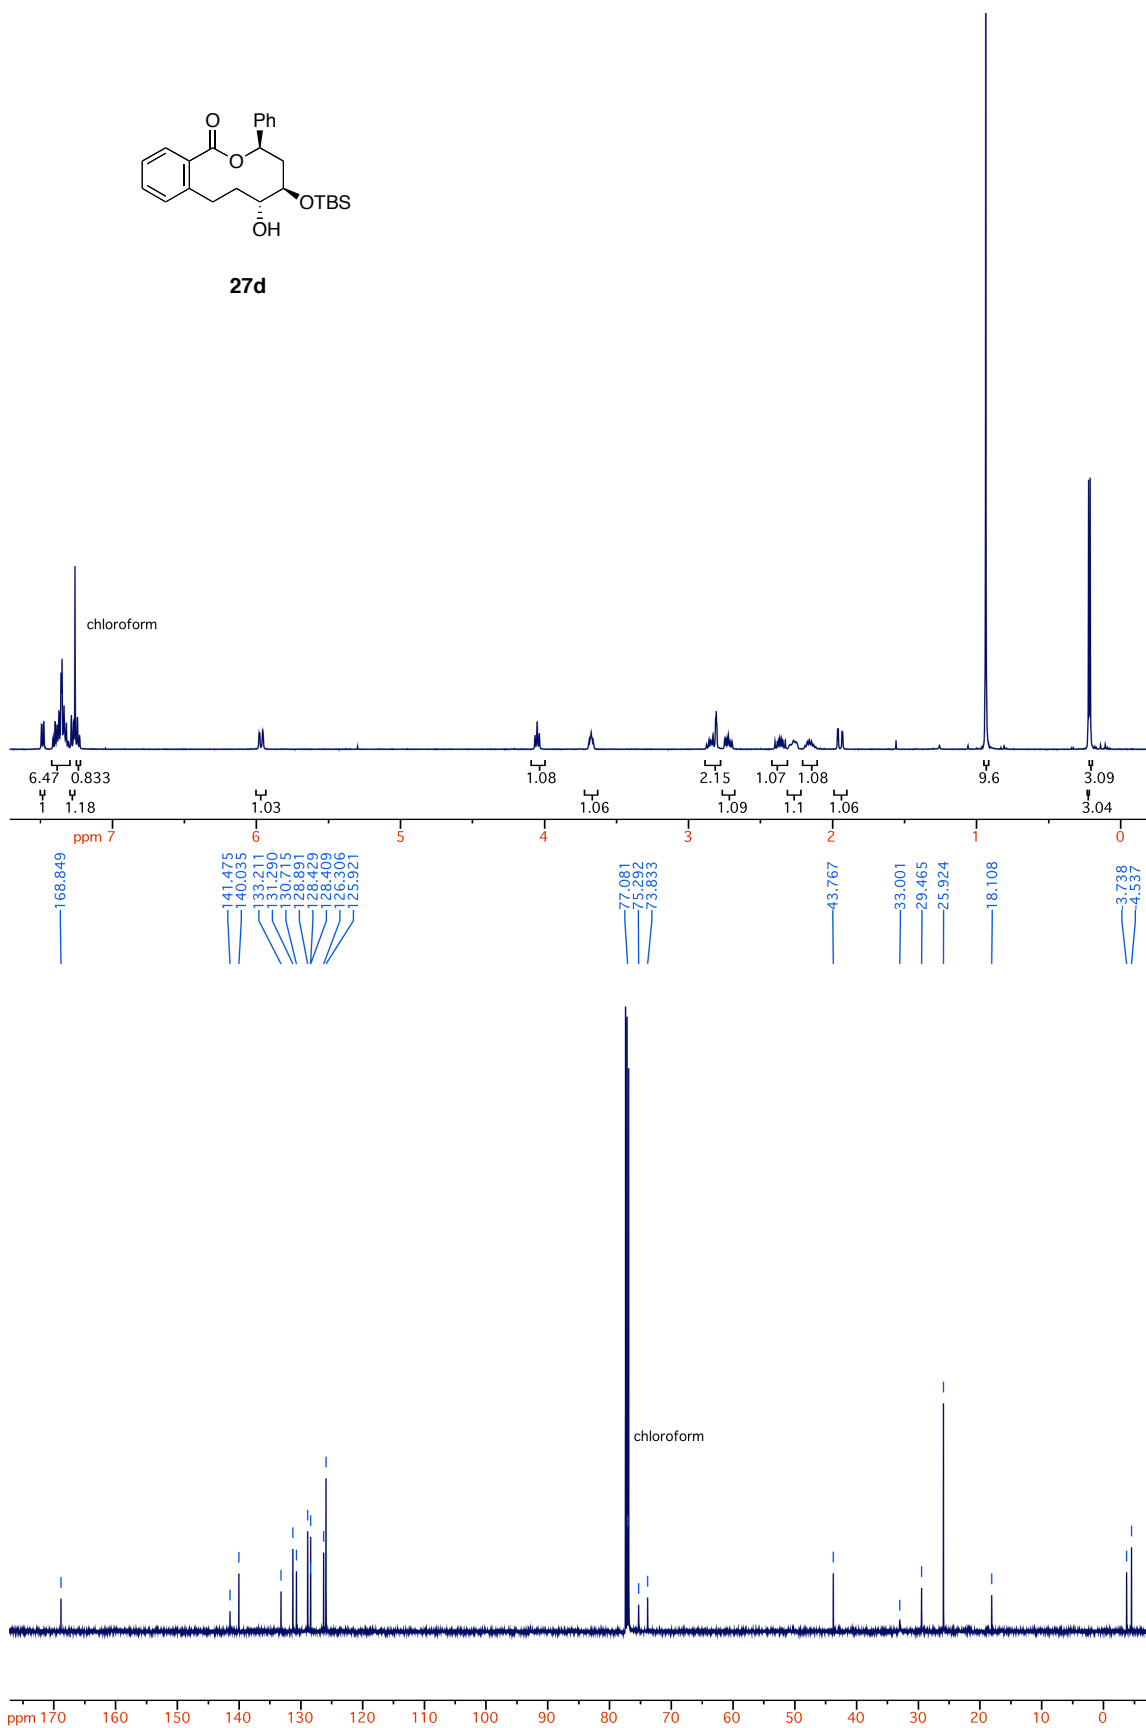

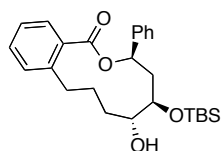**27e**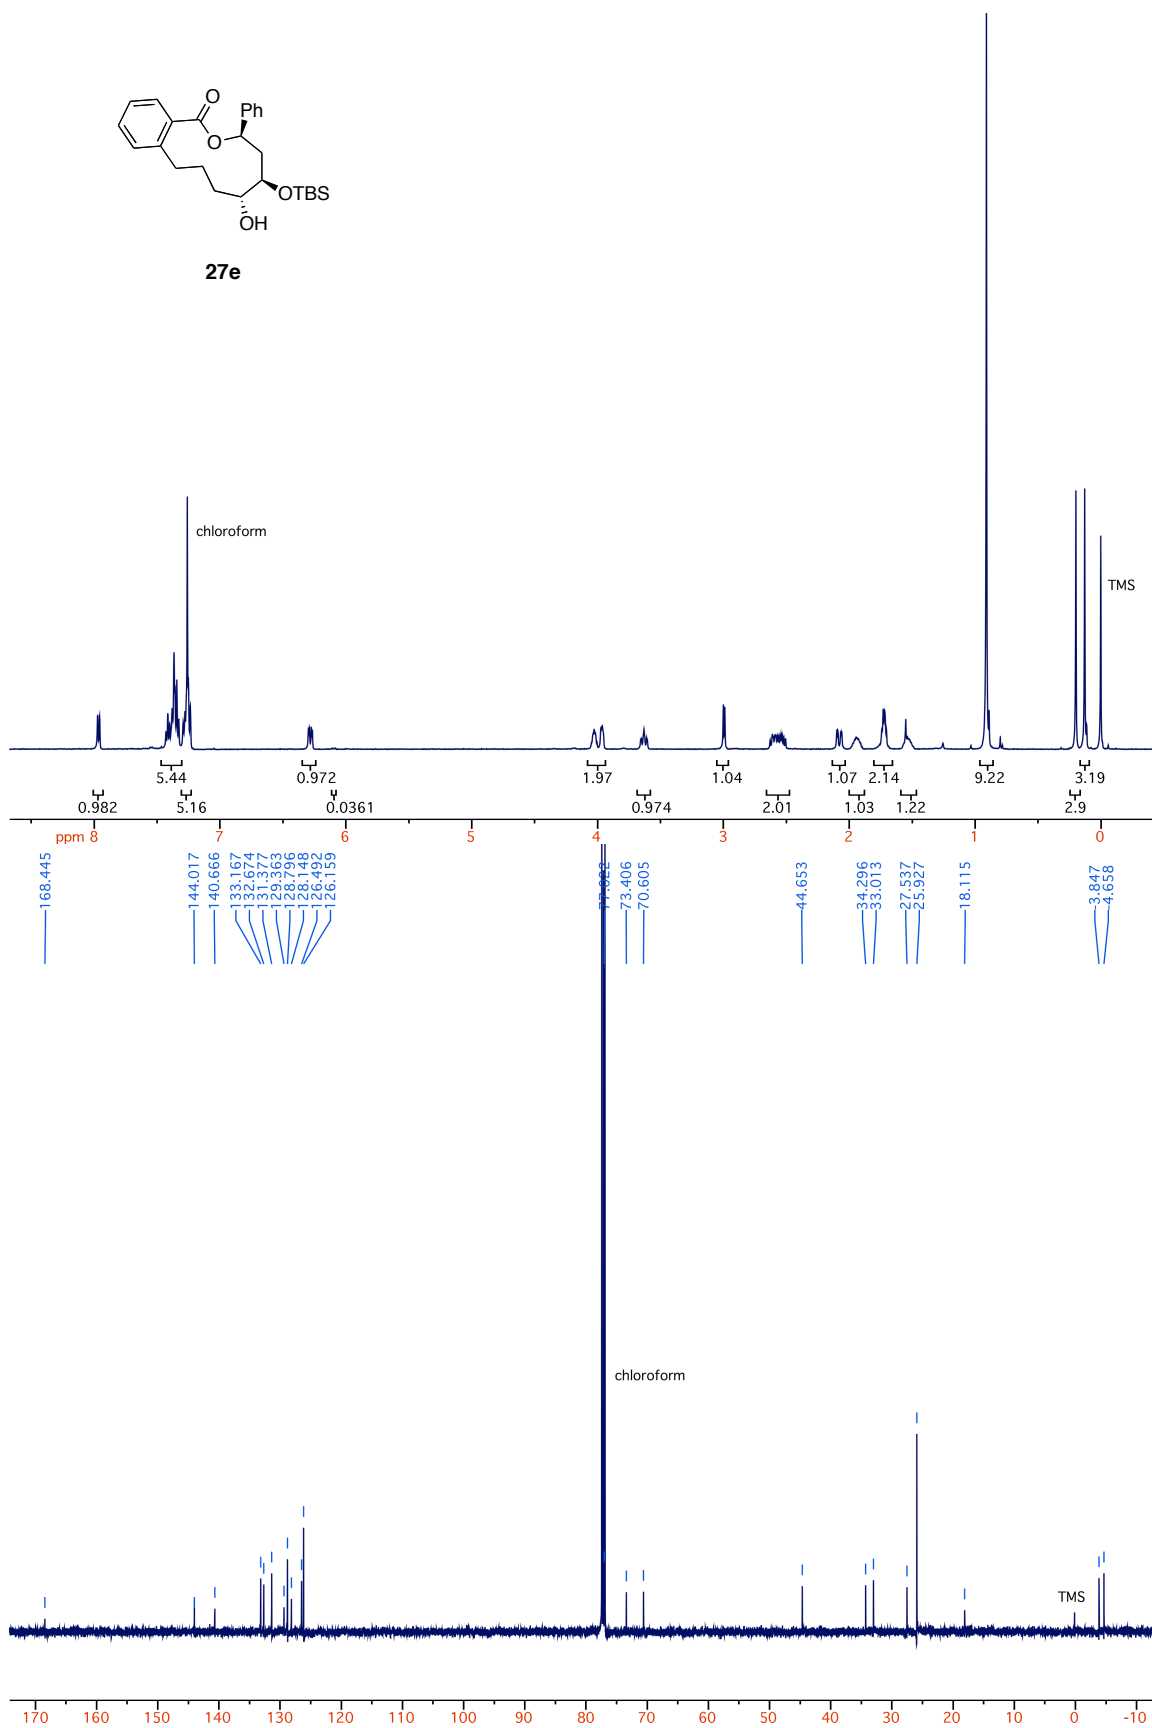

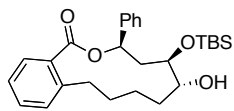**27f**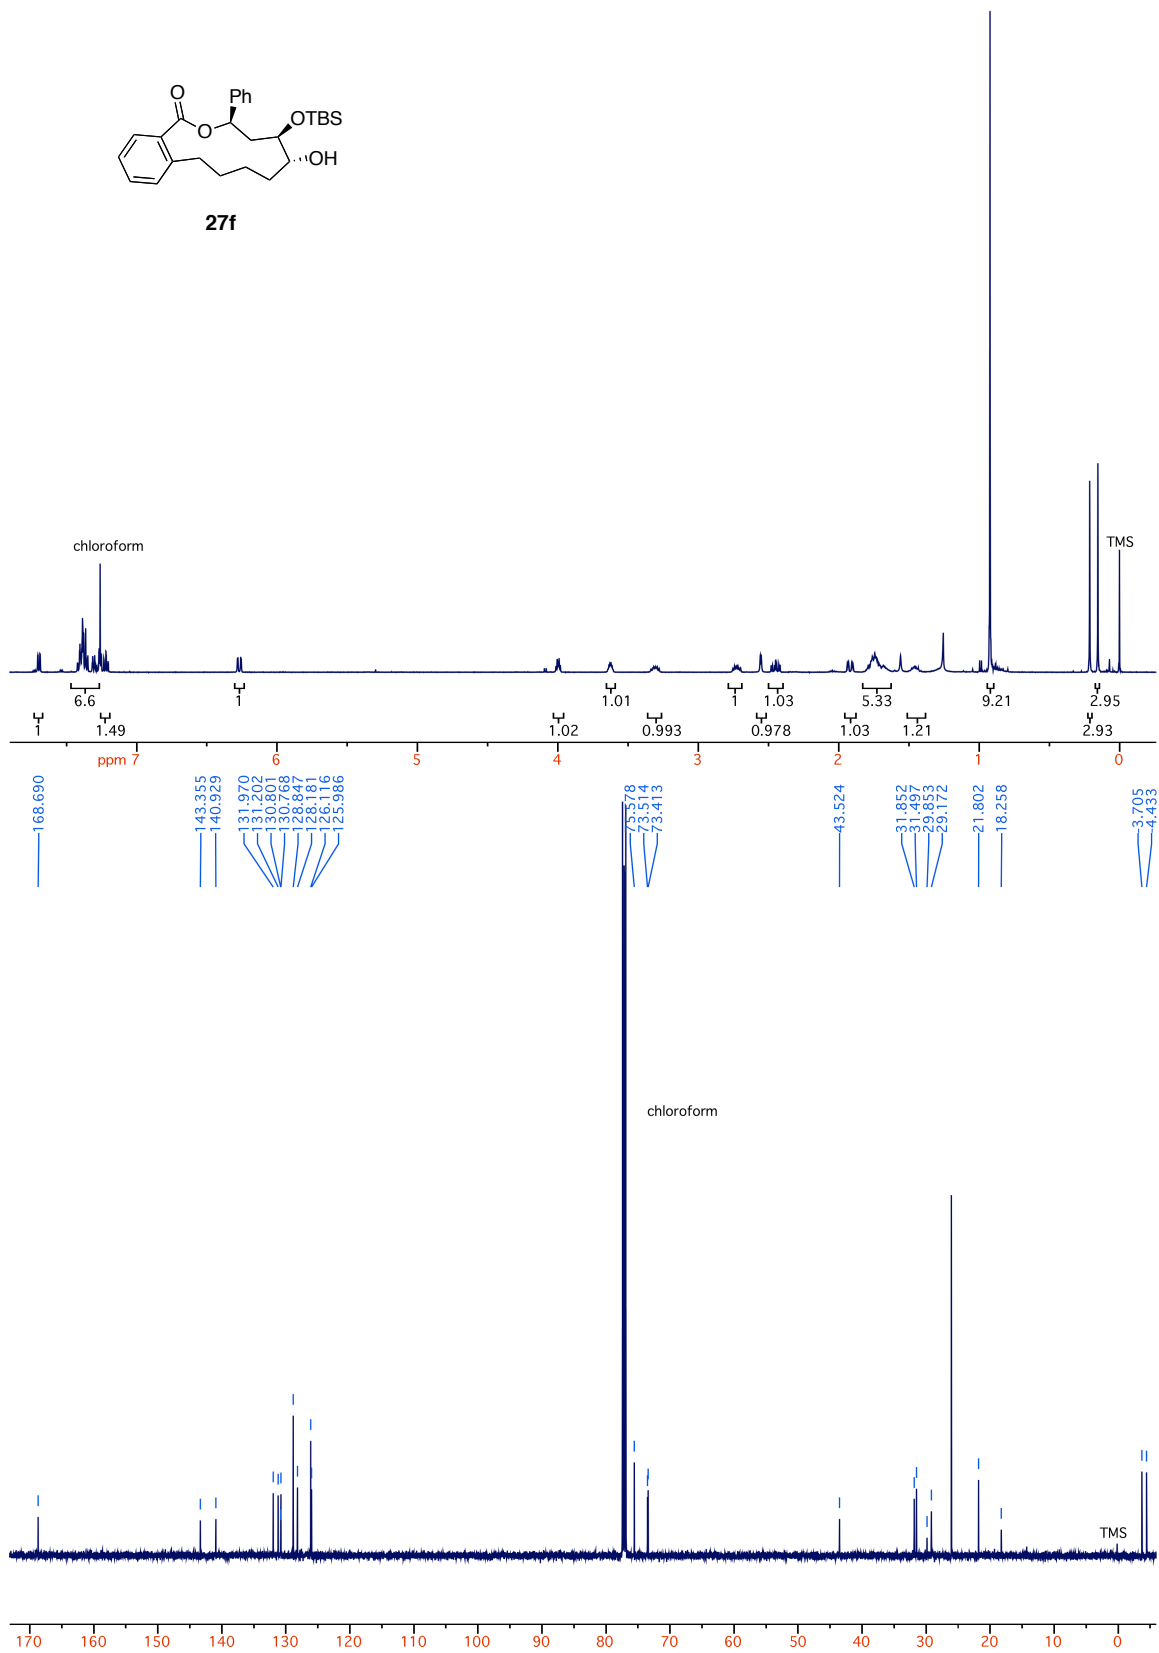



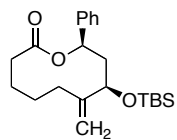**23a**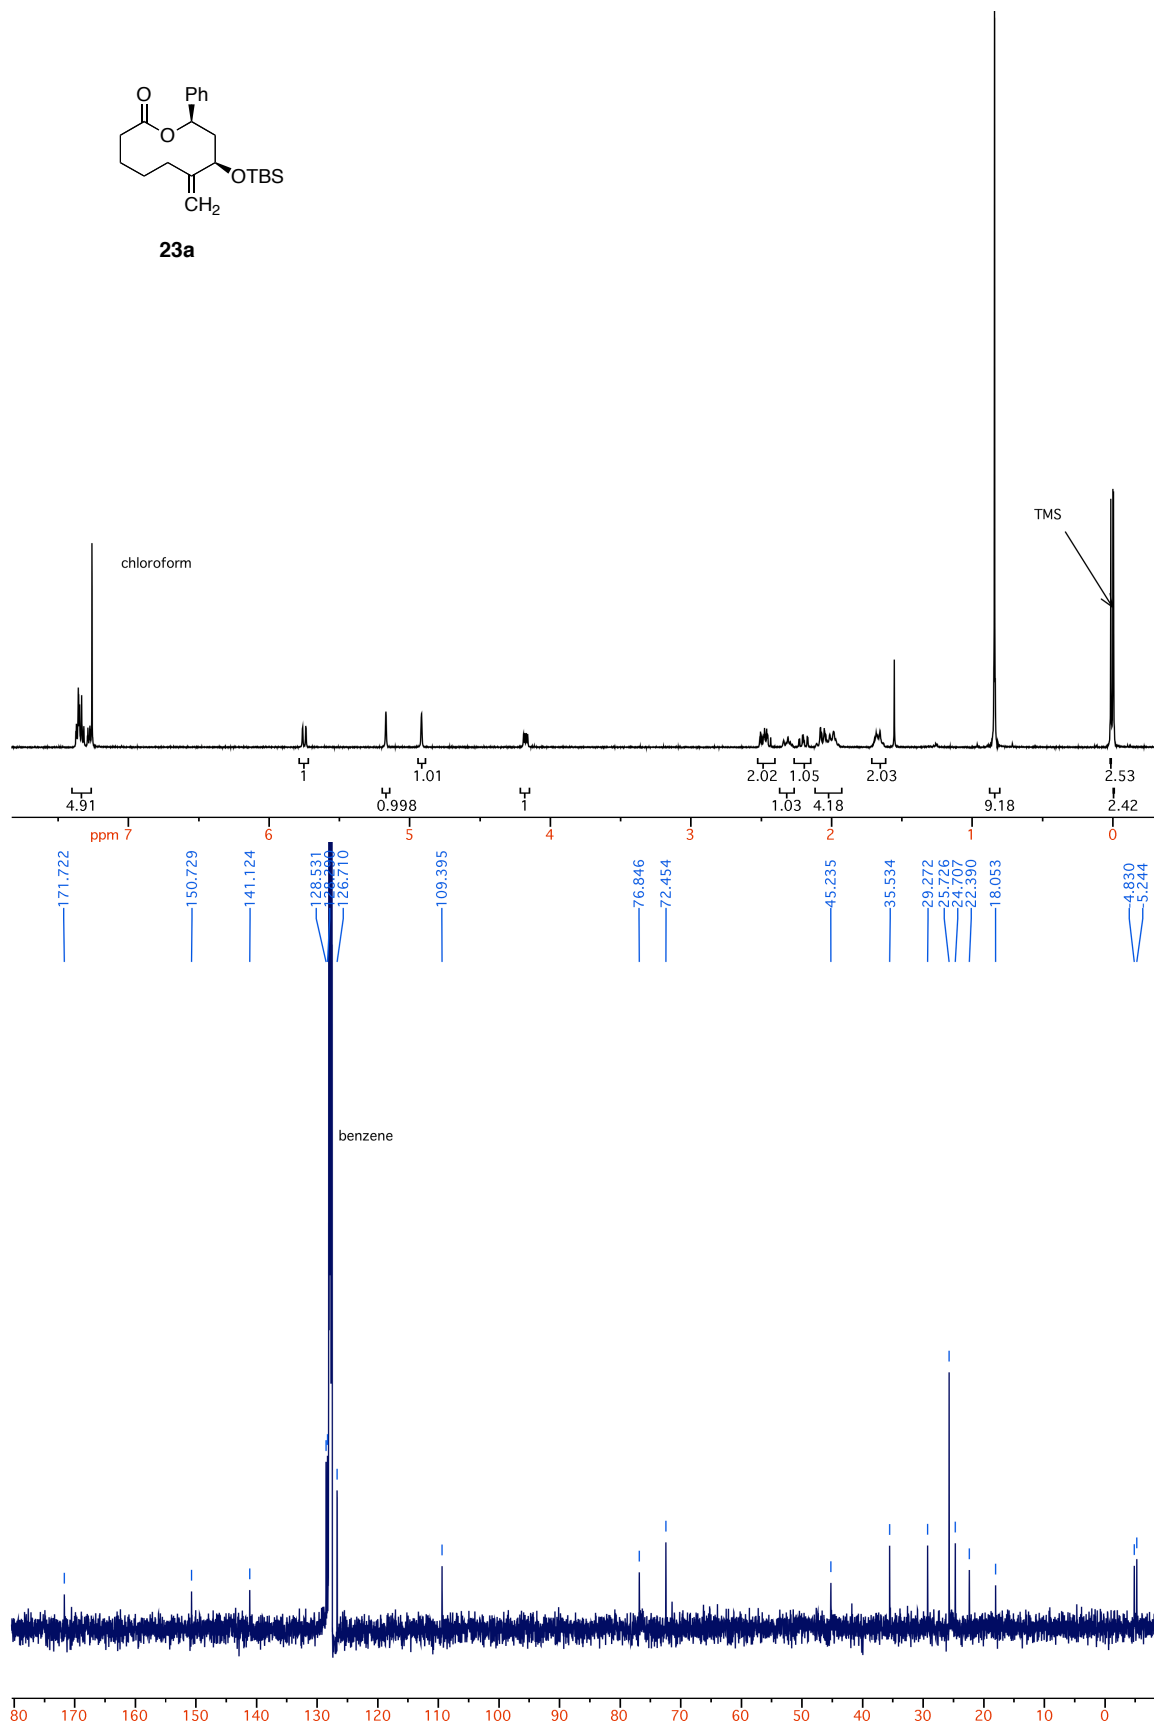

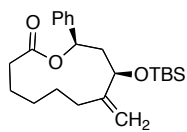**23b**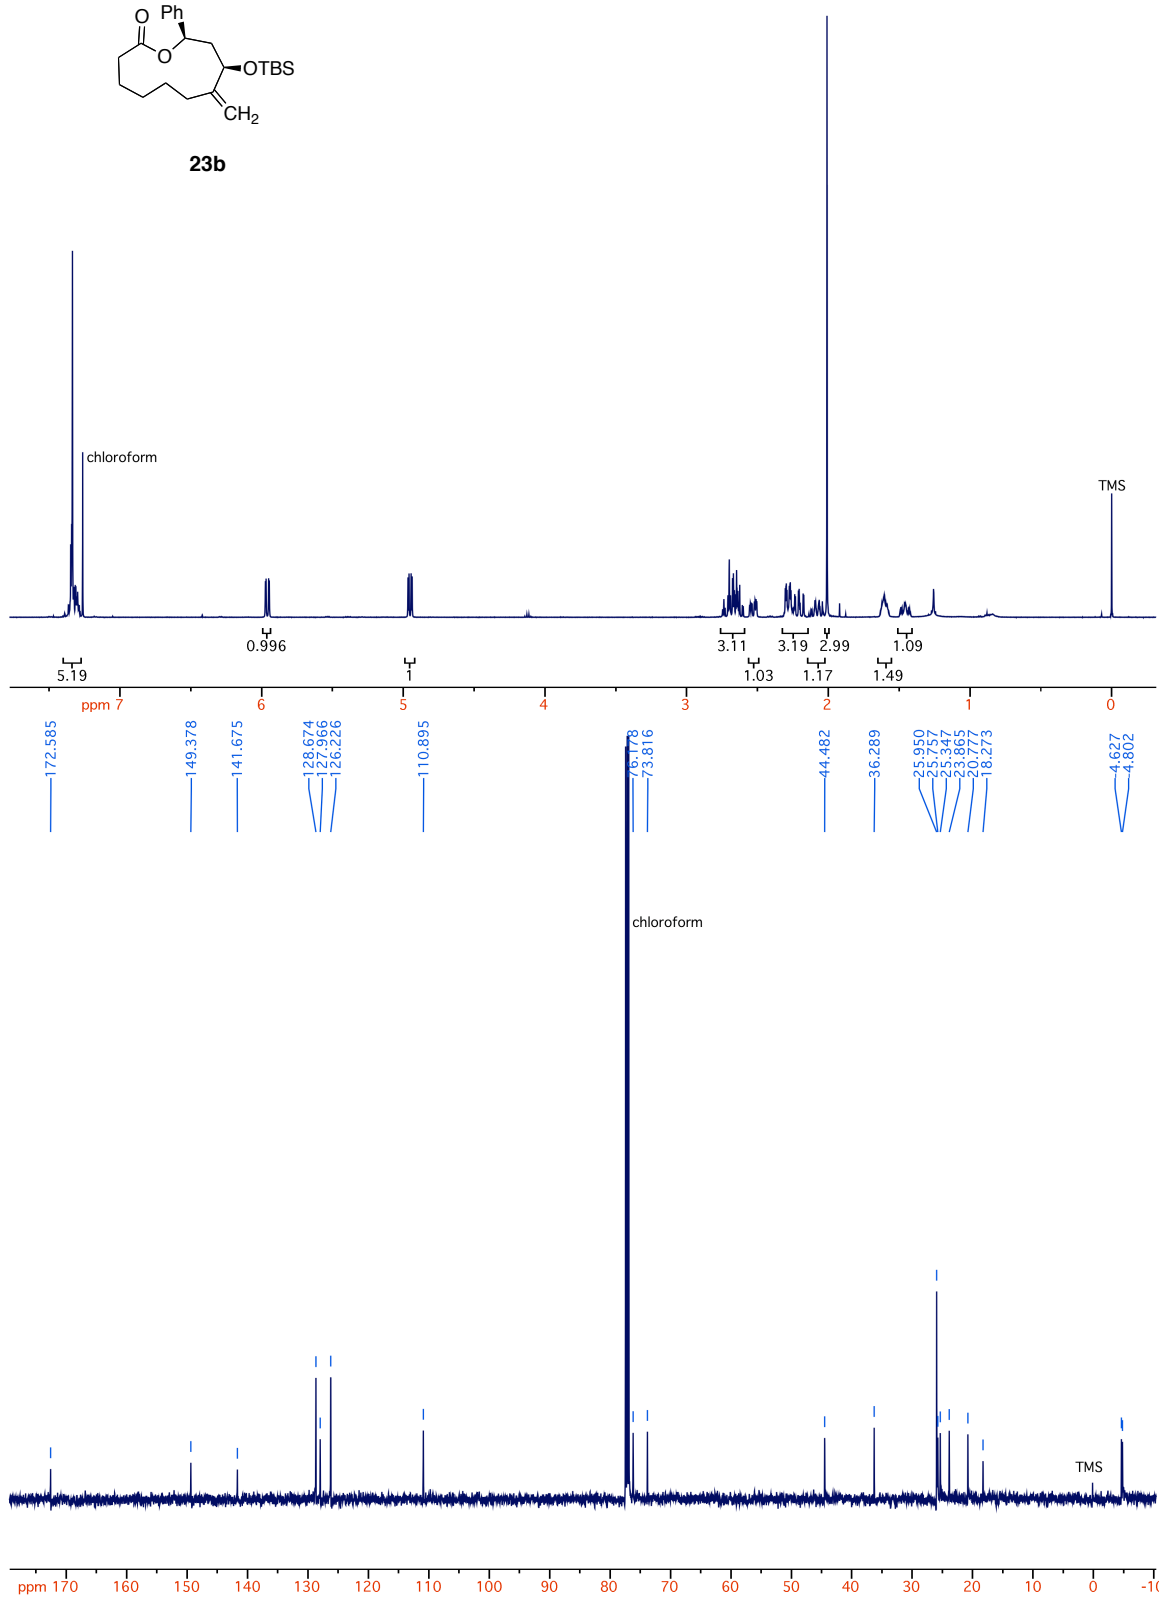

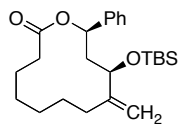**23c**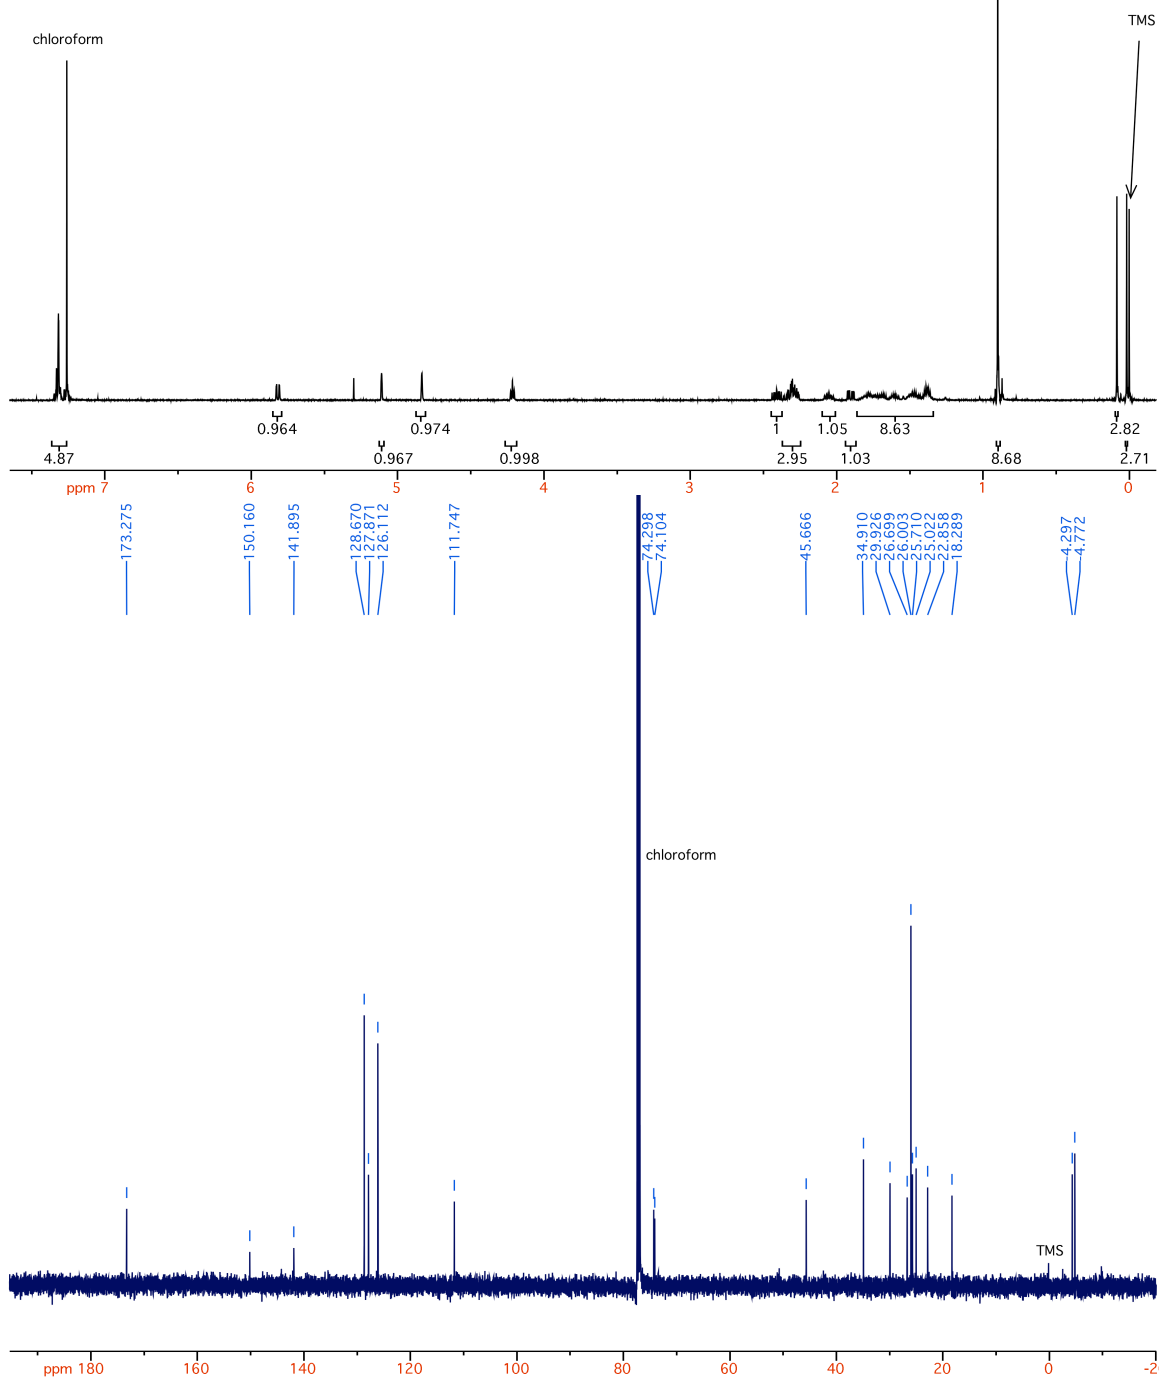

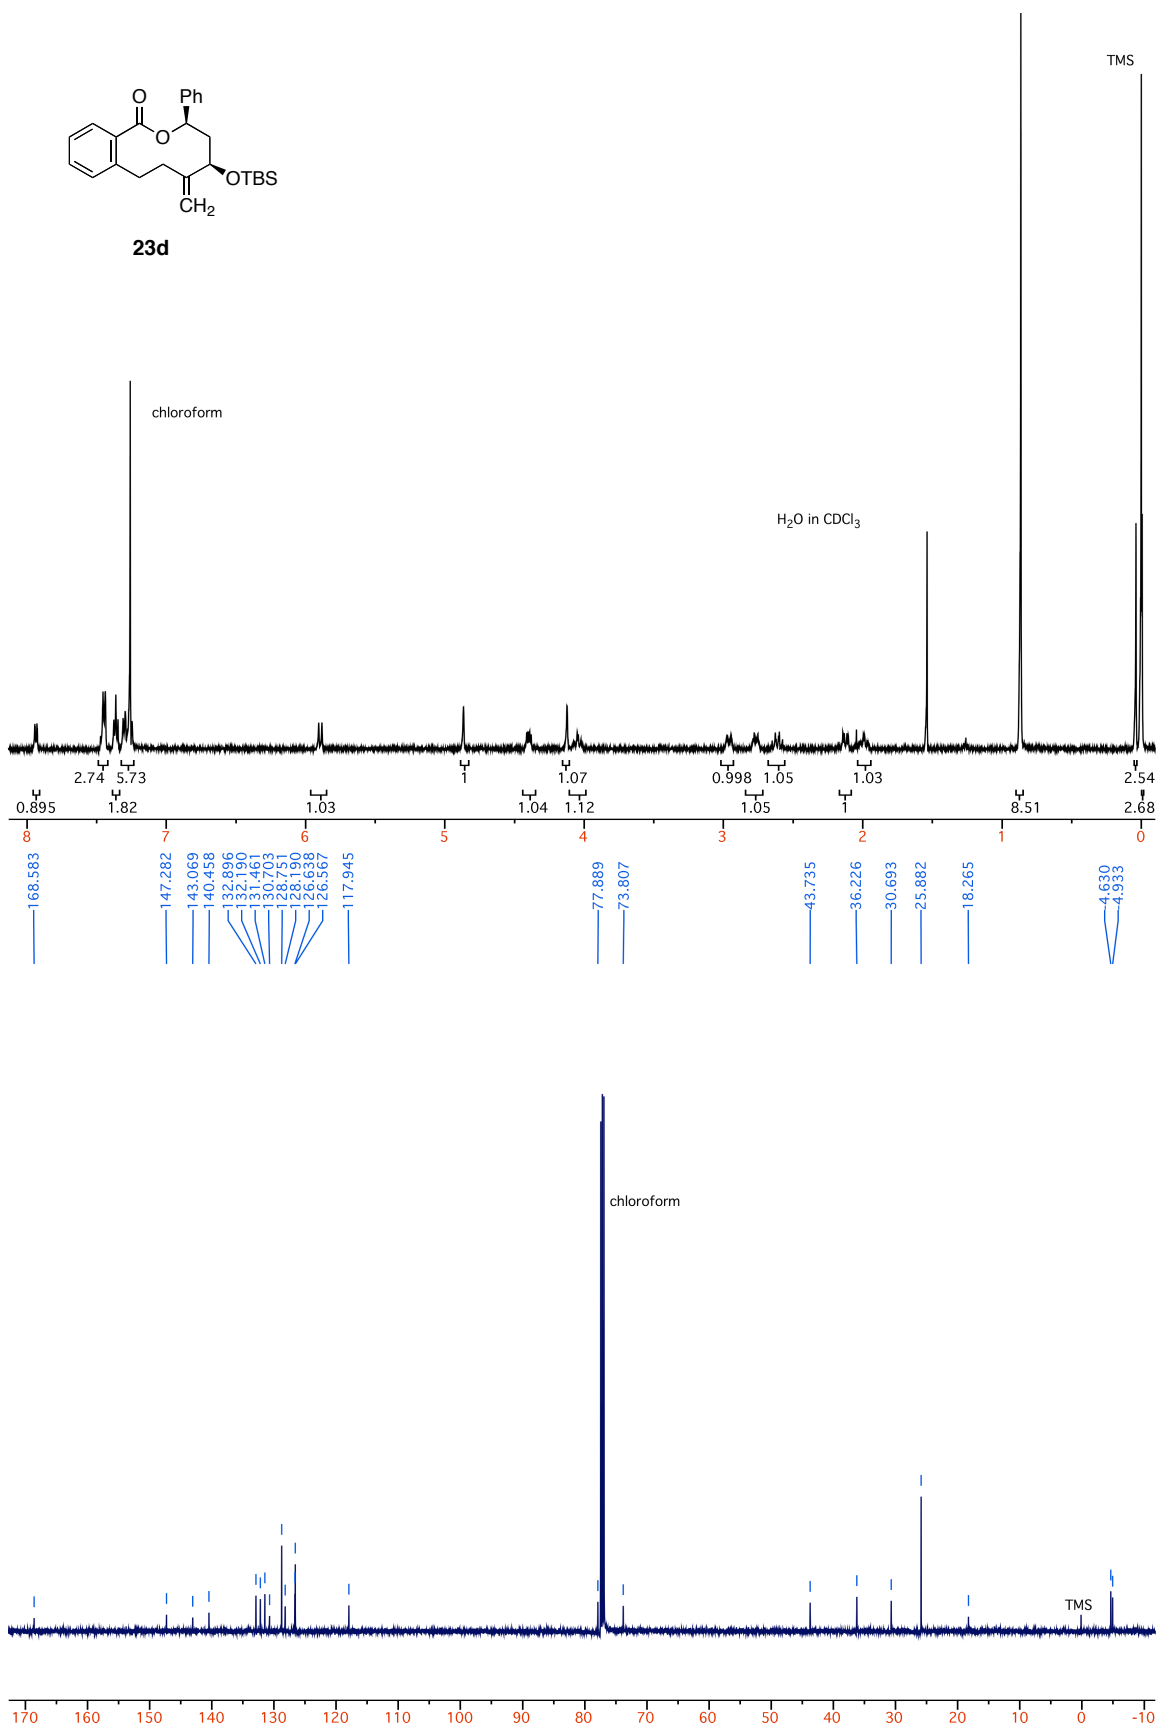



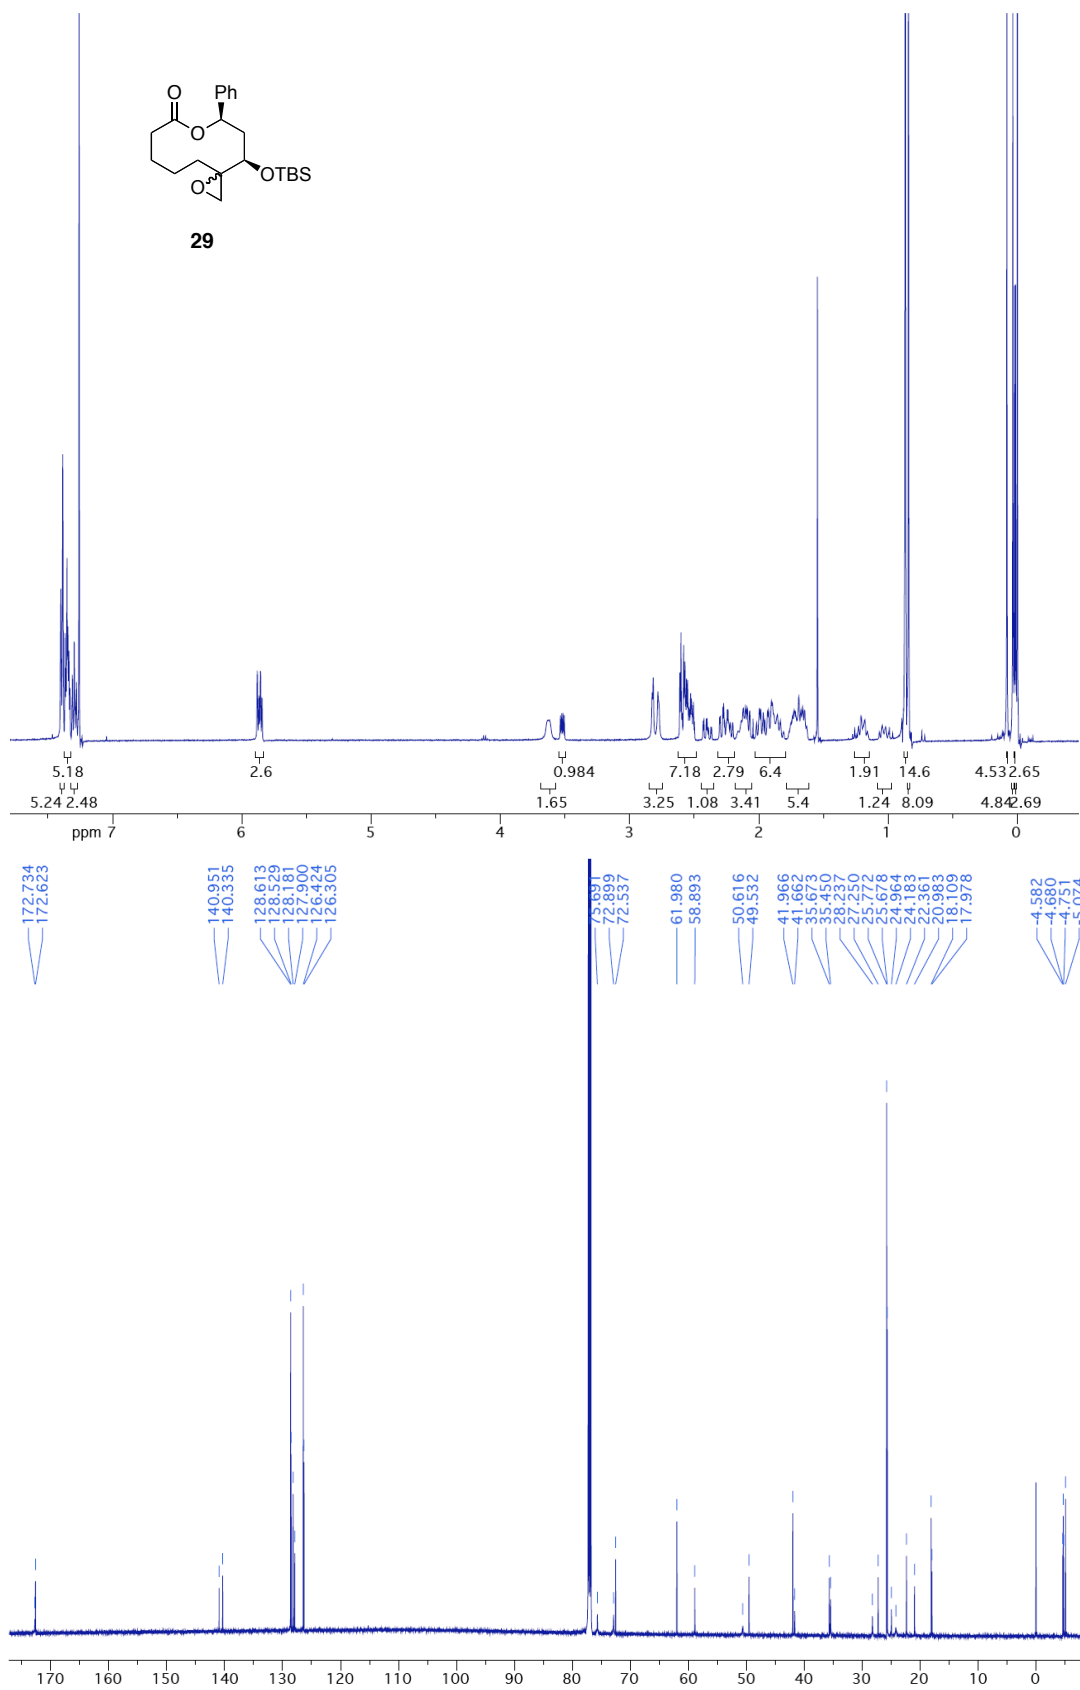

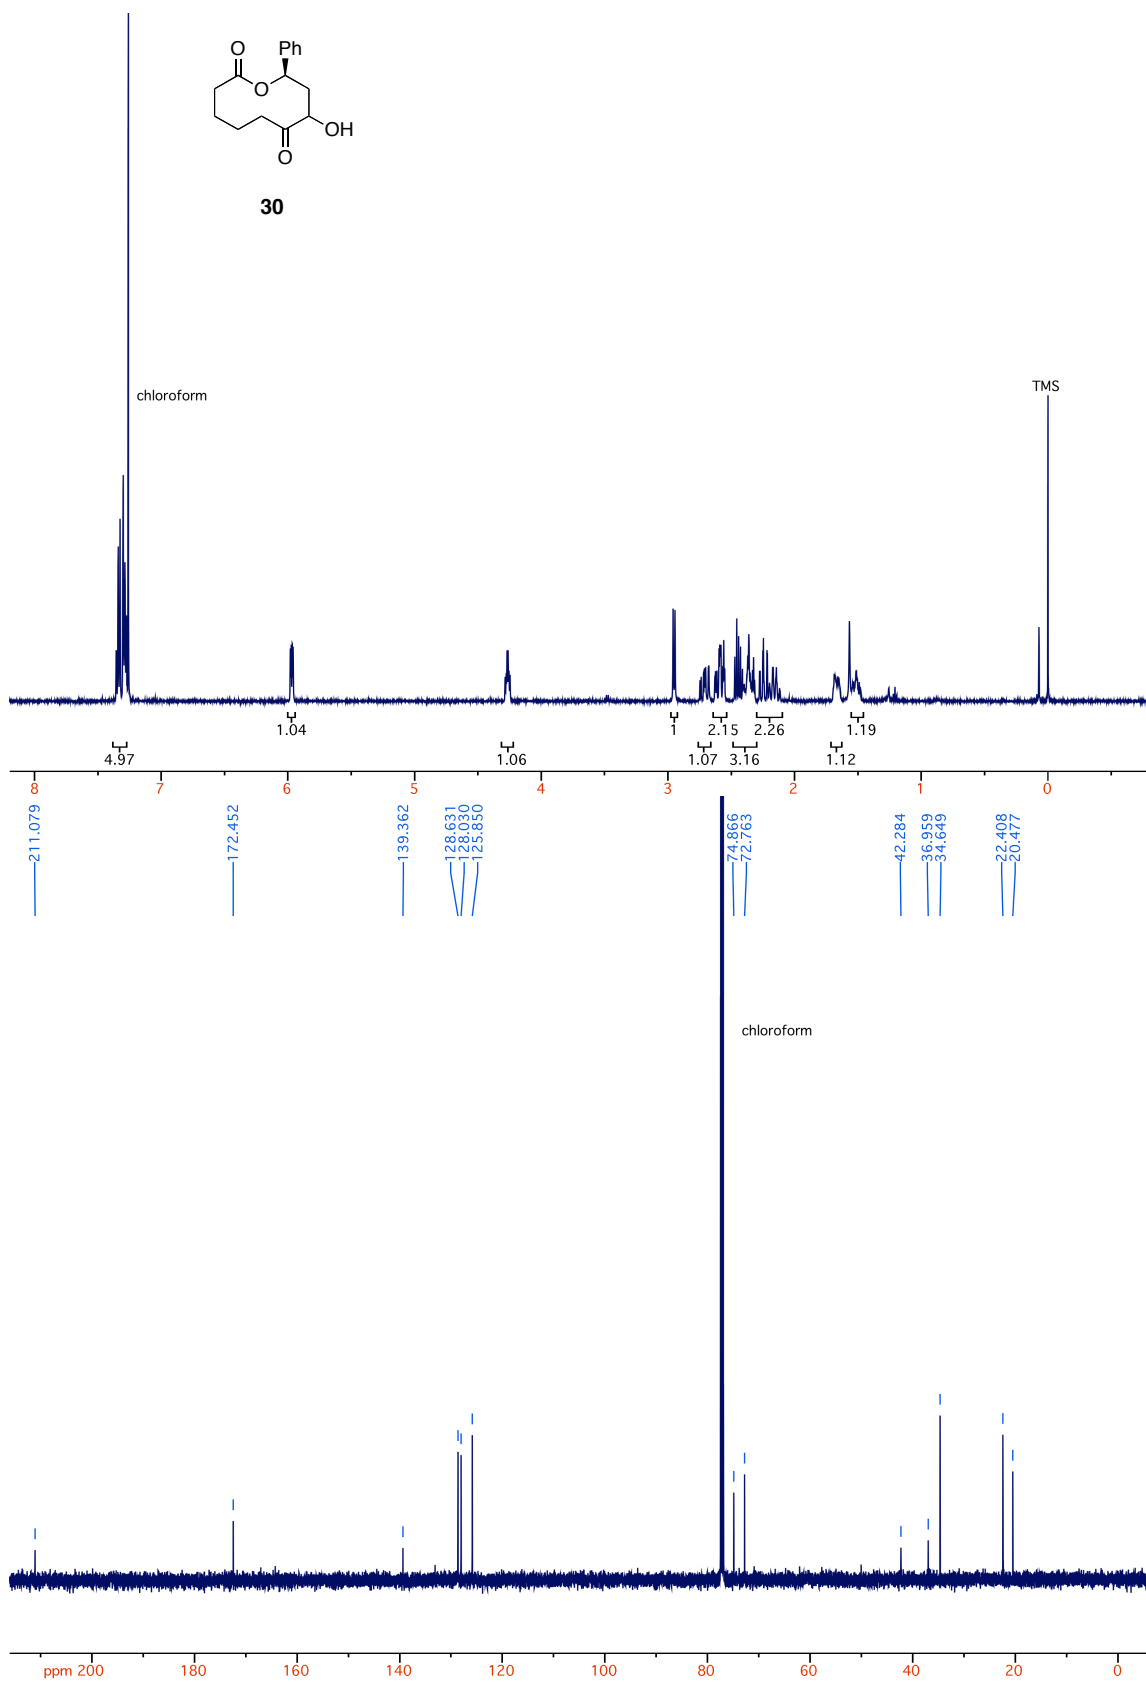

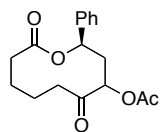**31**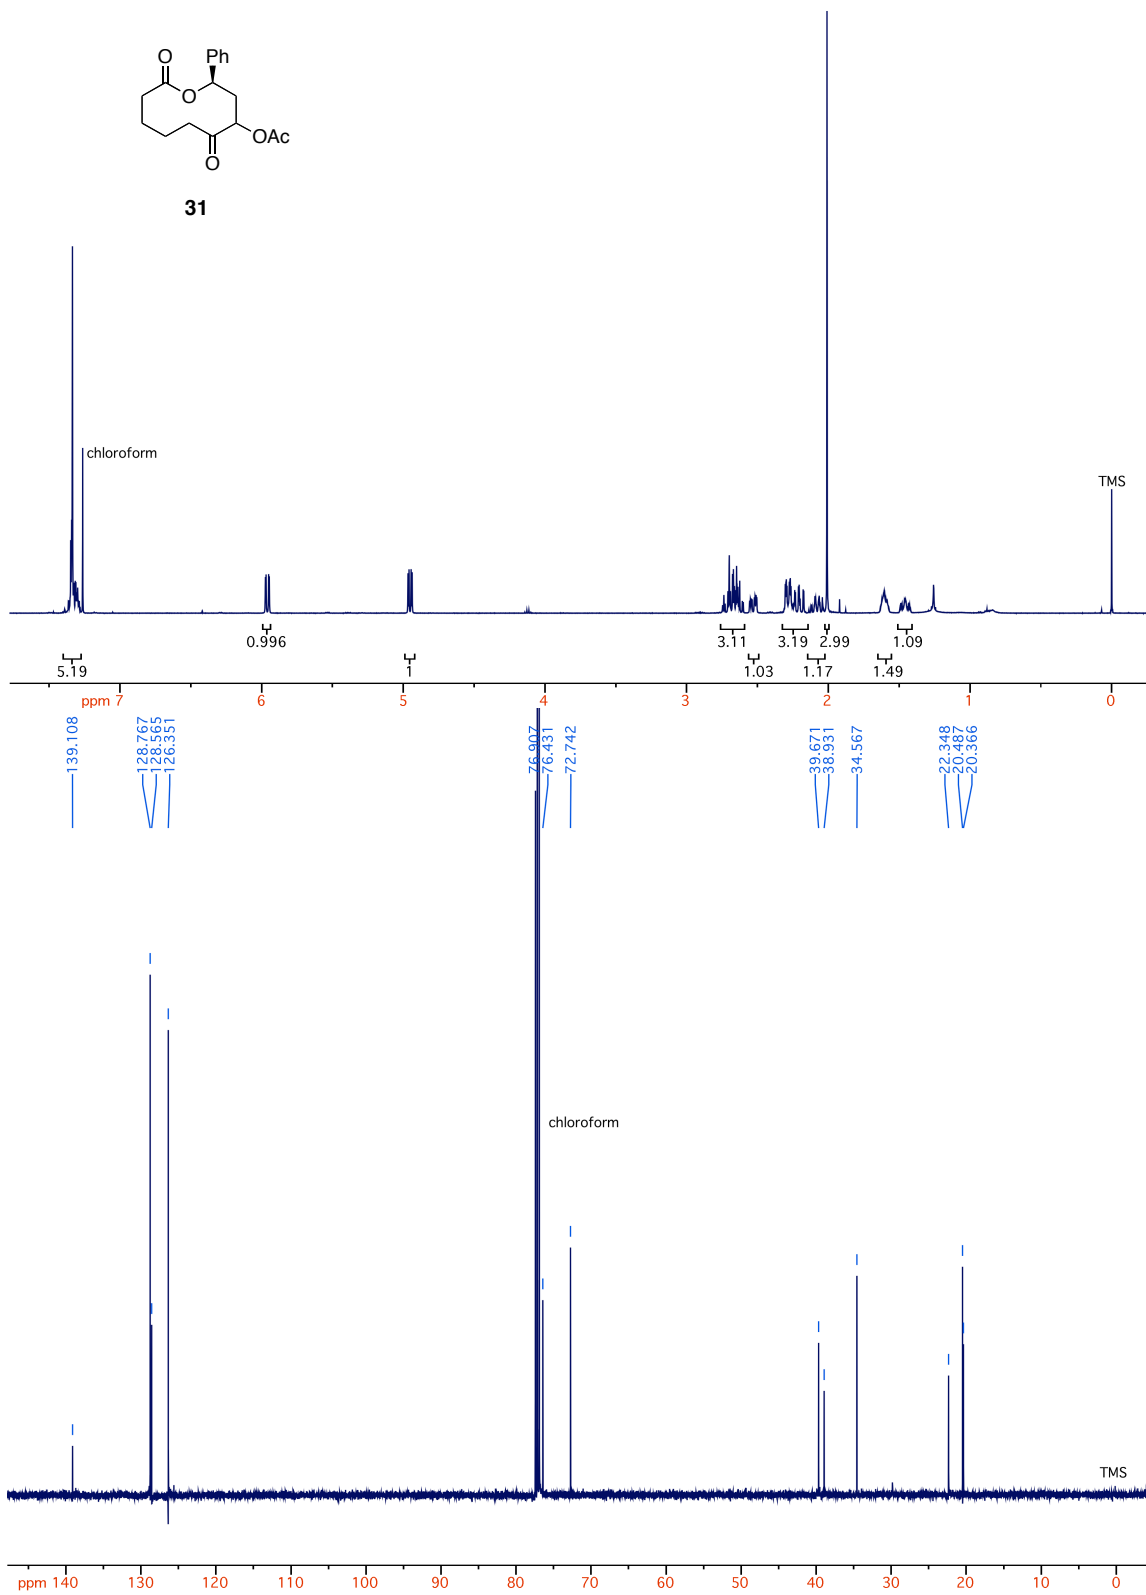



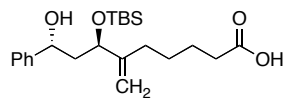**22a**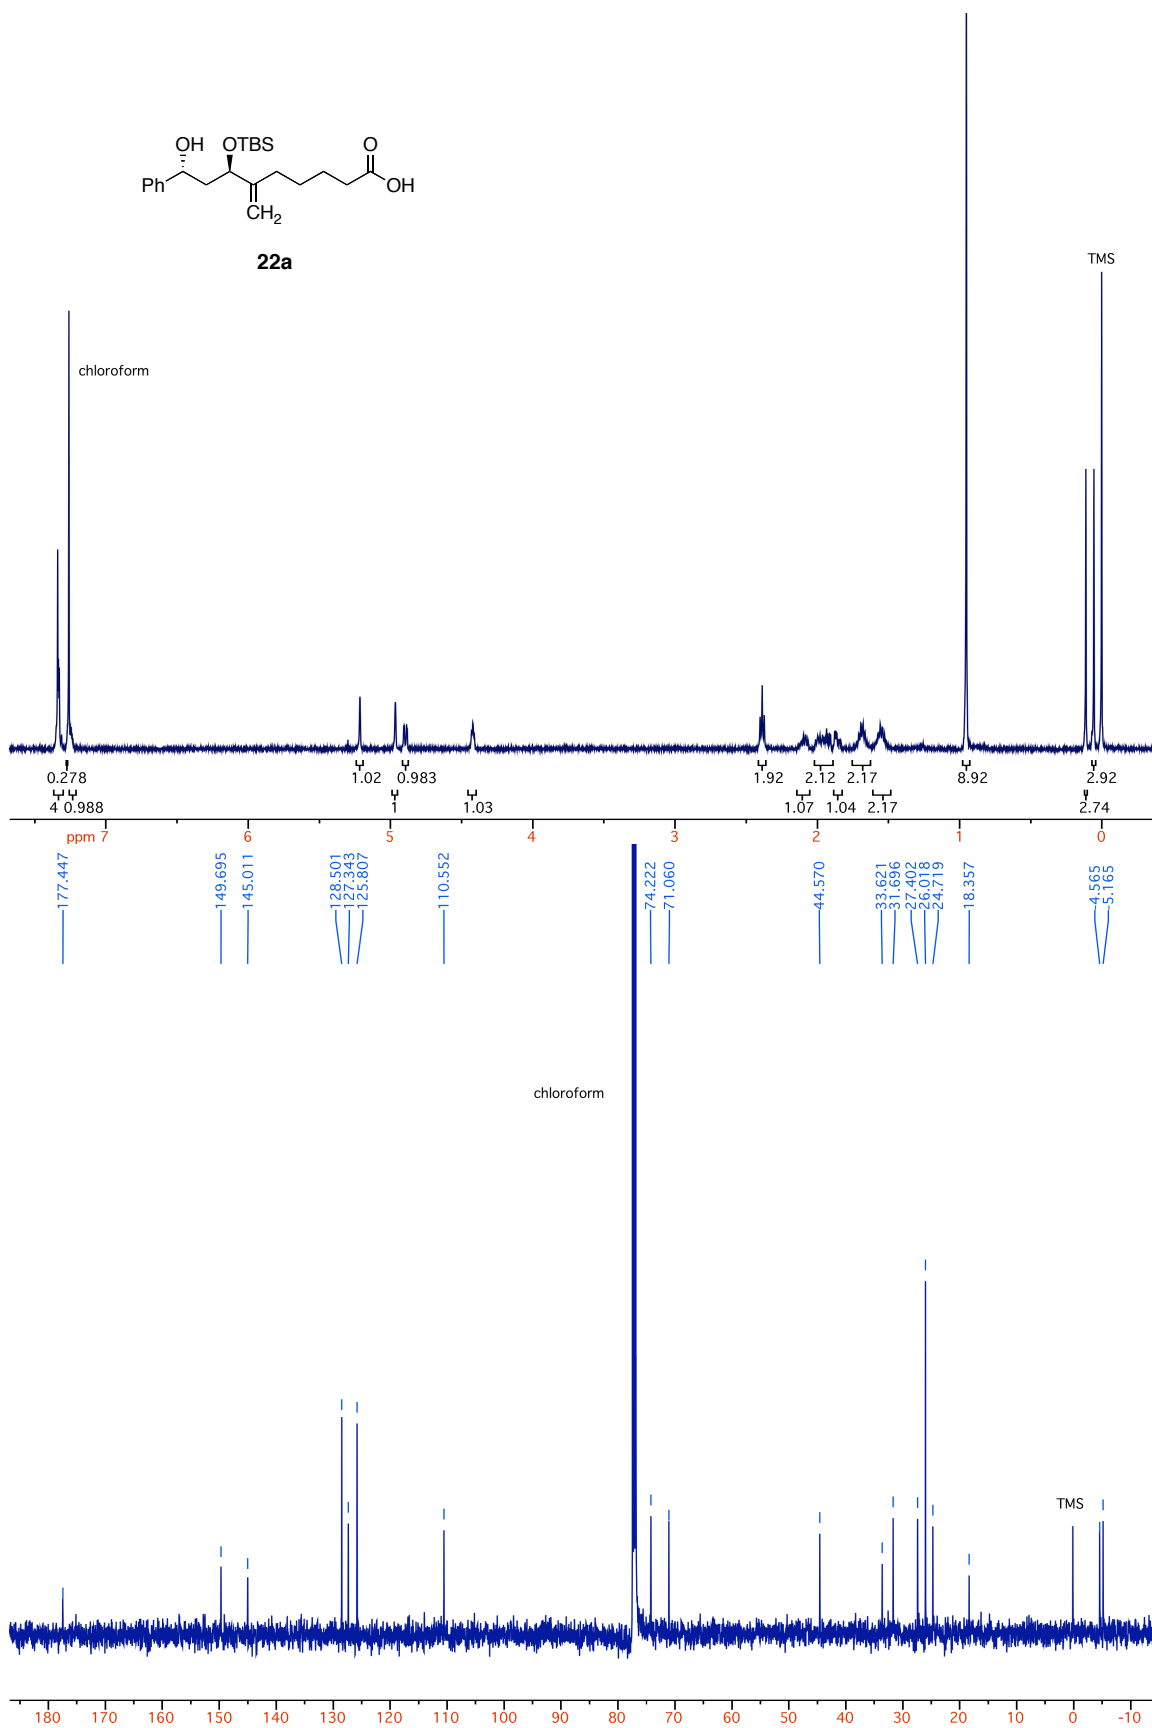

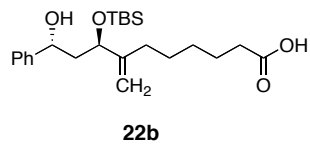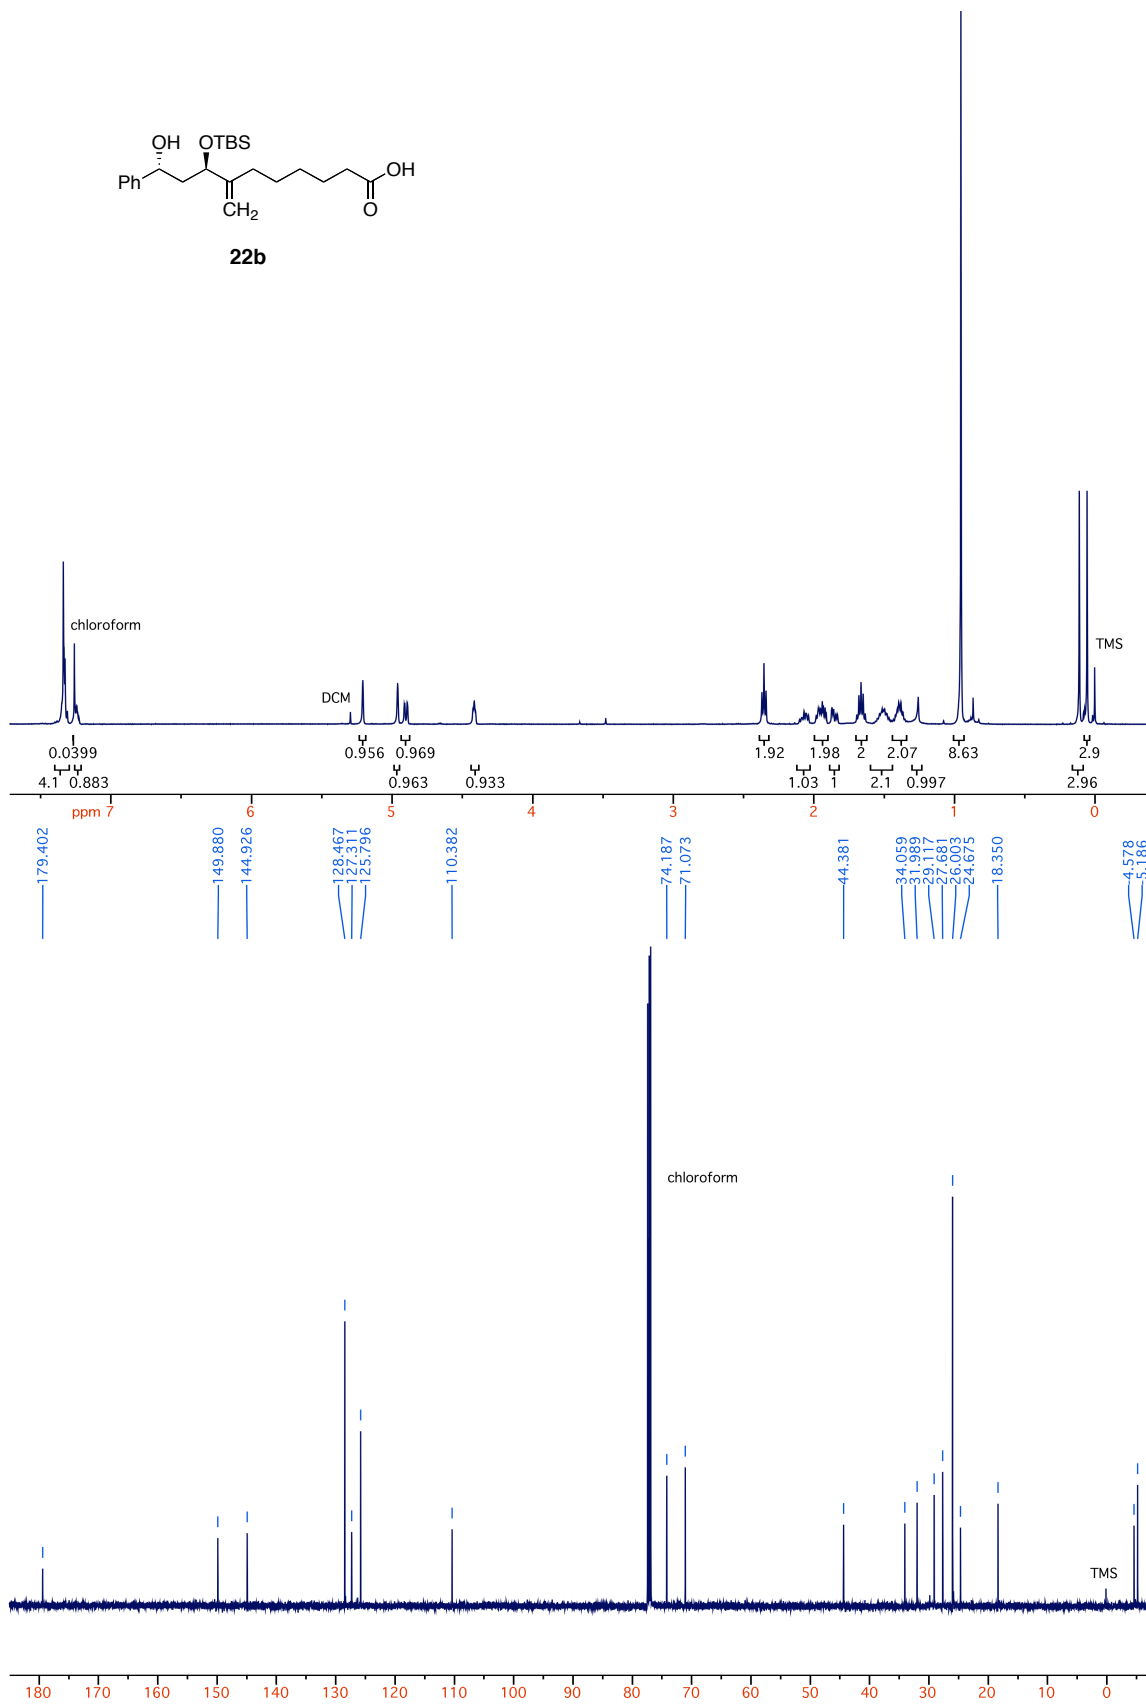



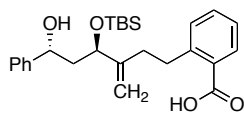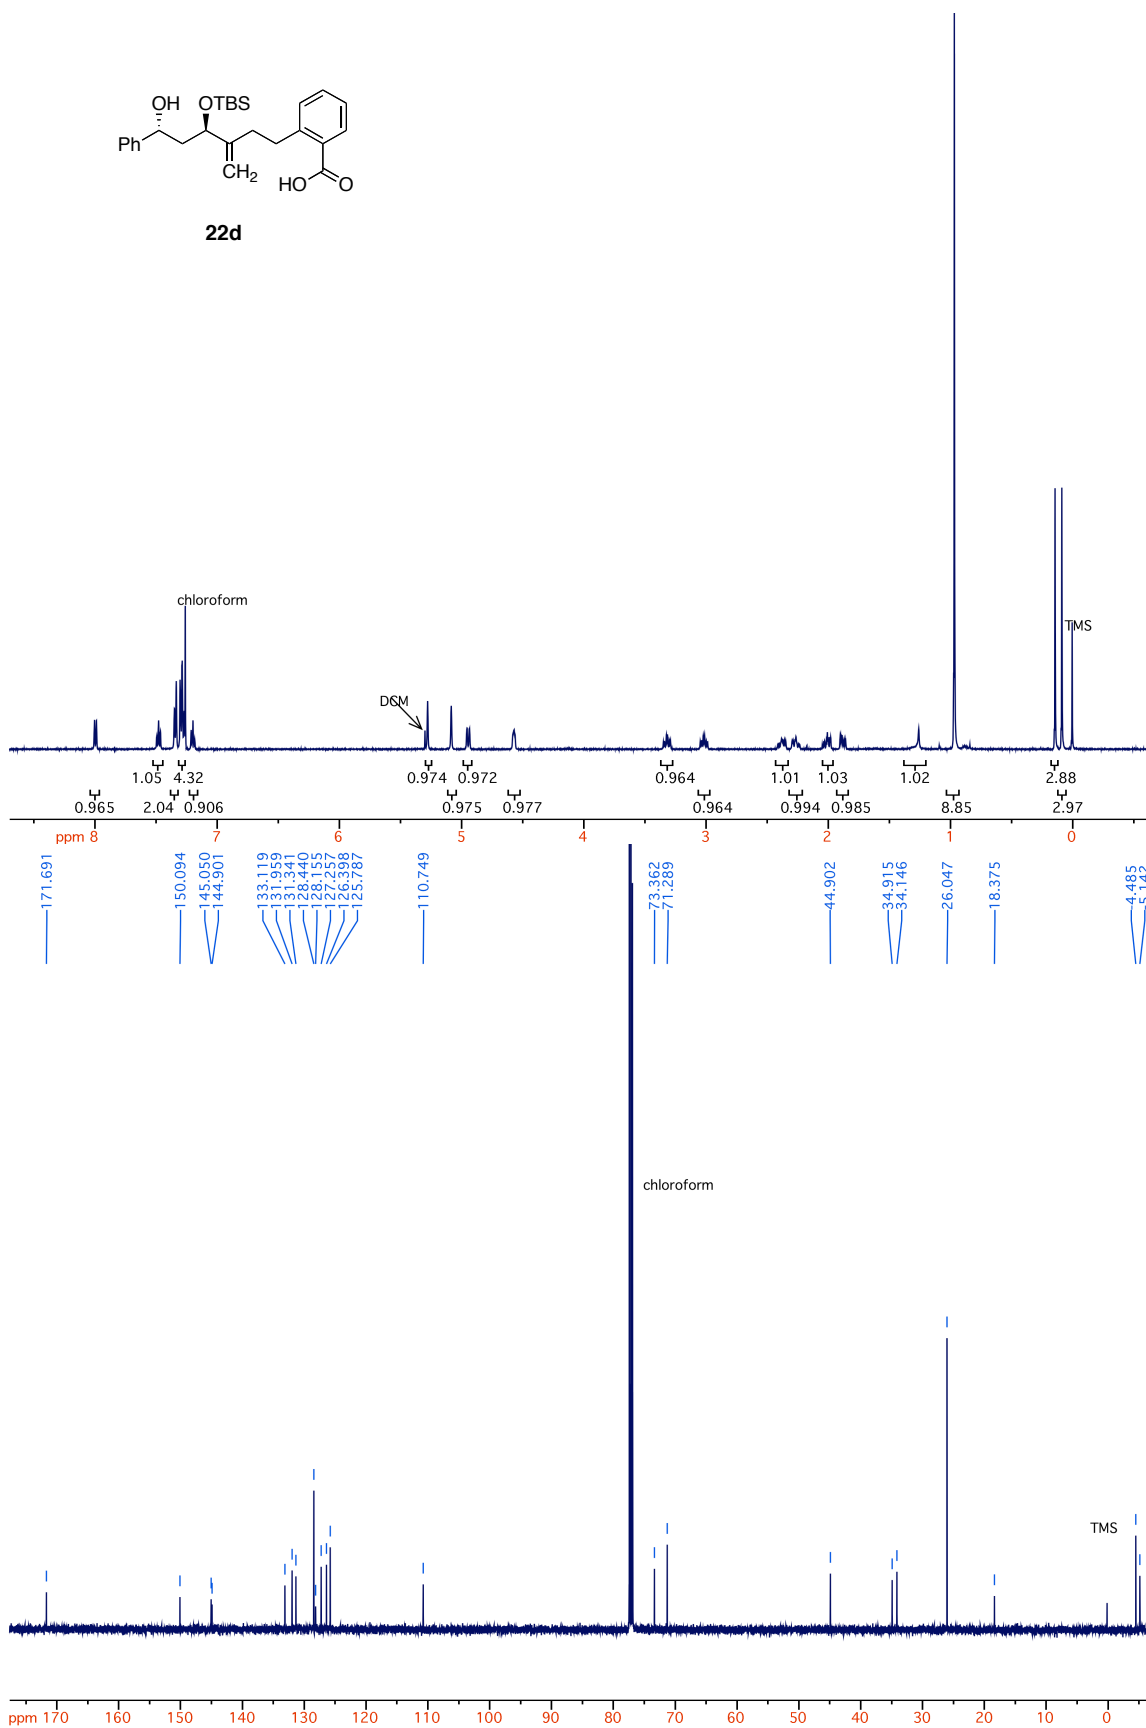

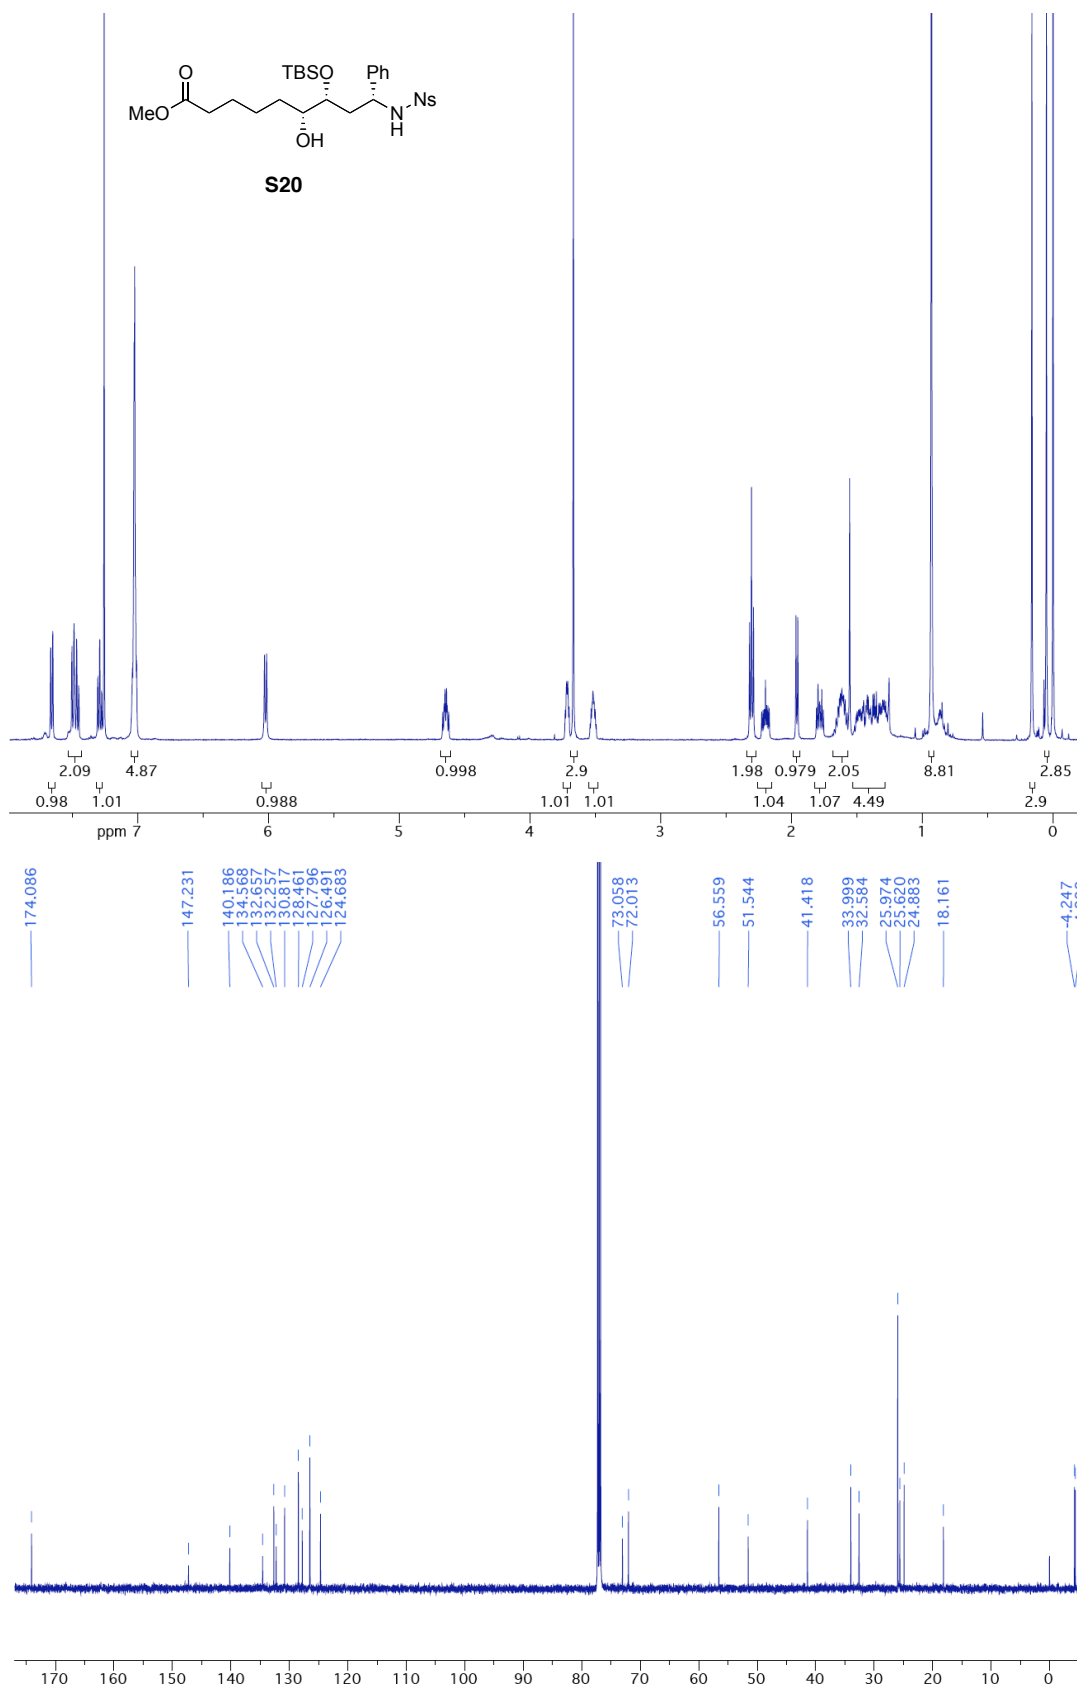

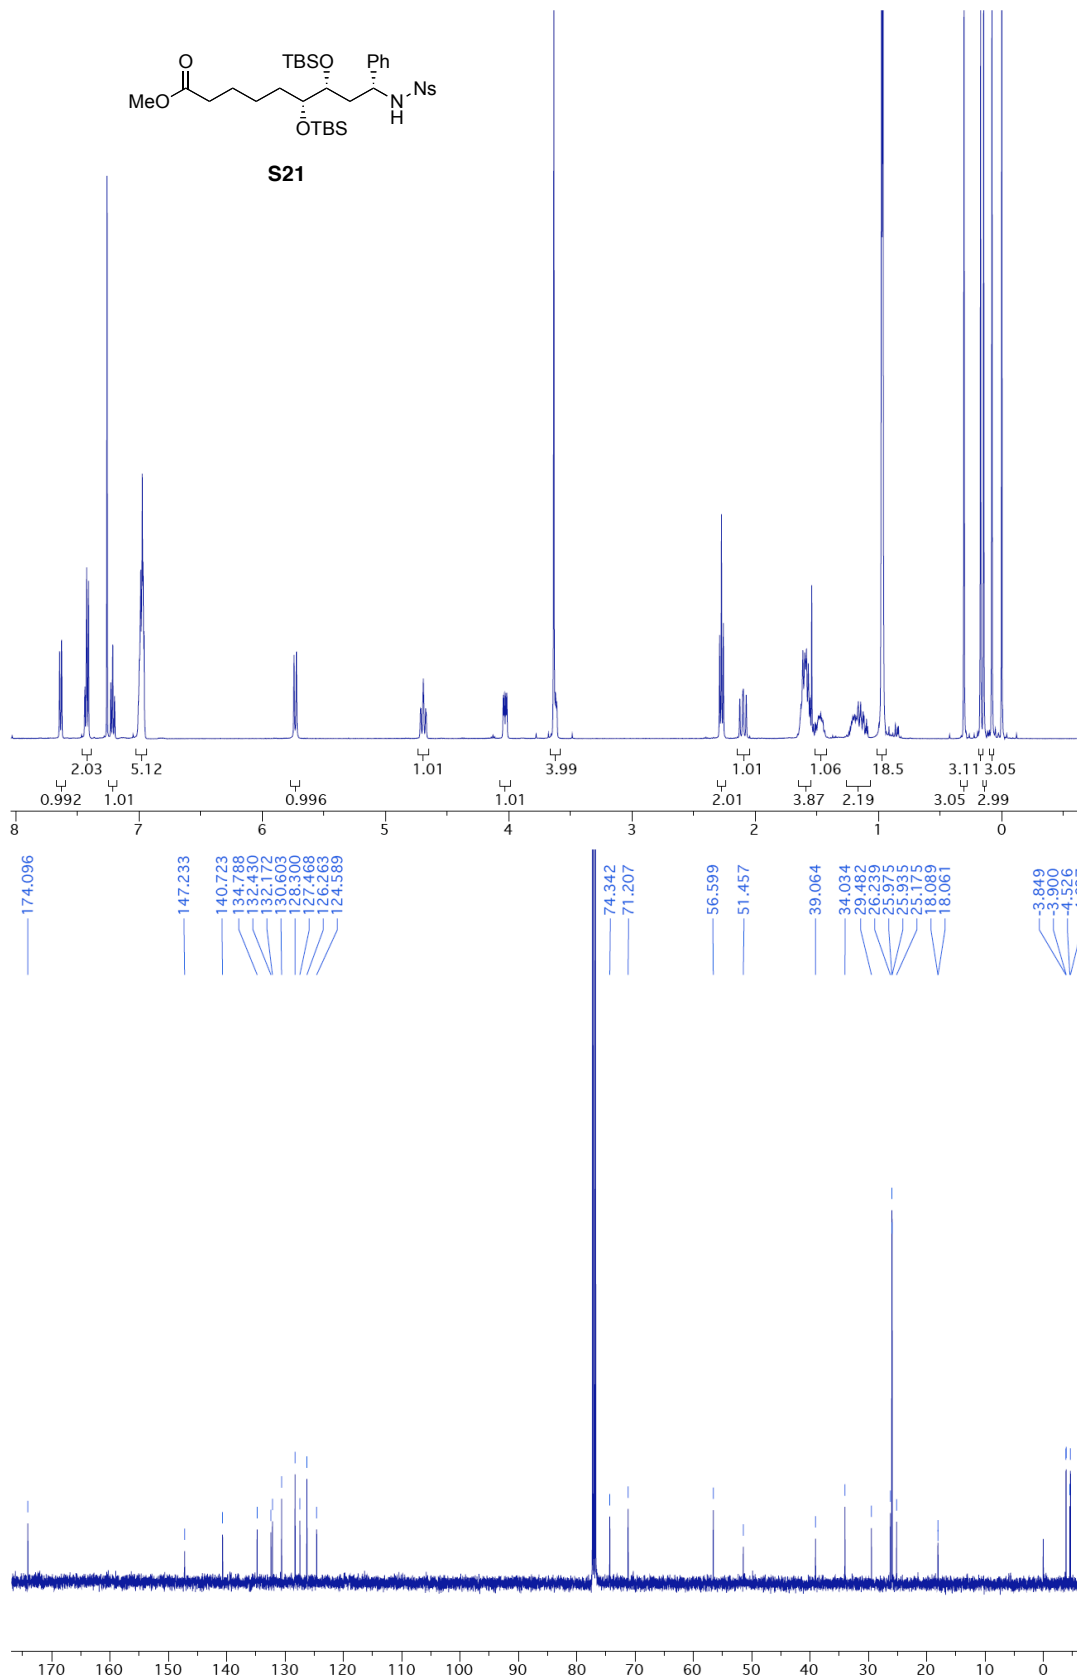

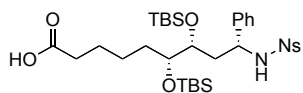**S22**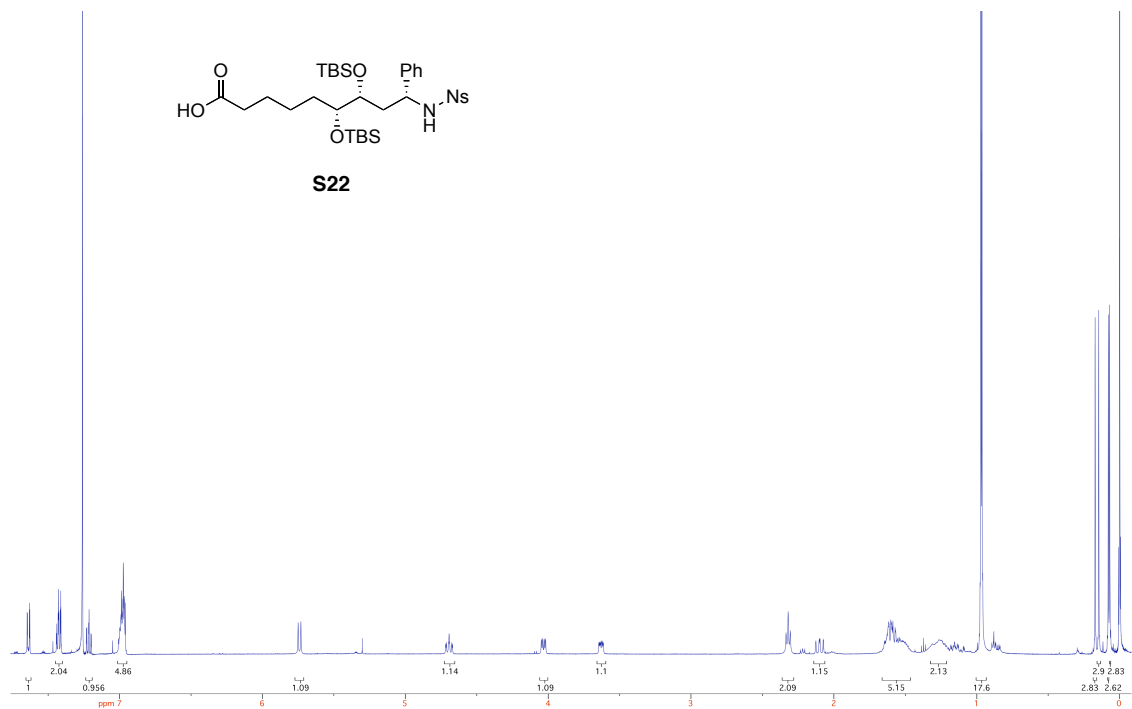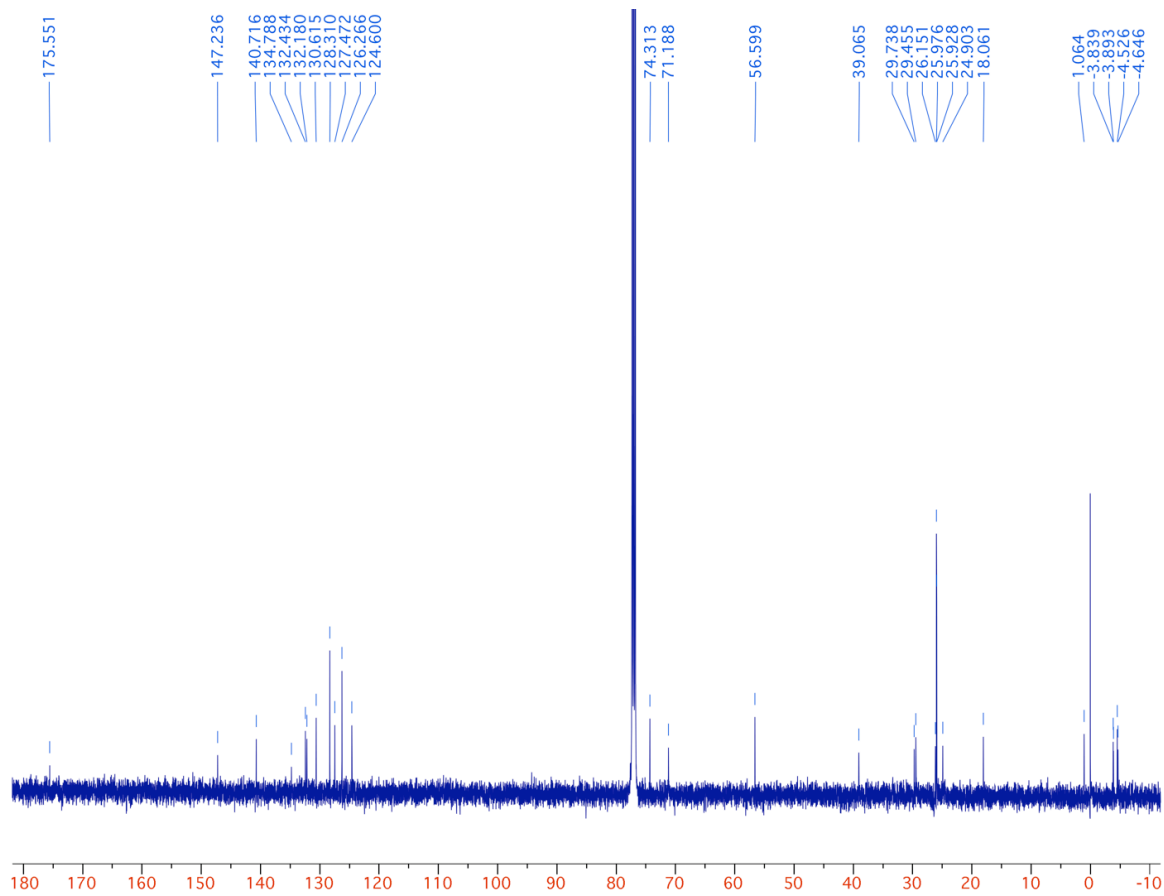

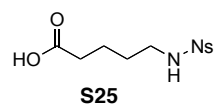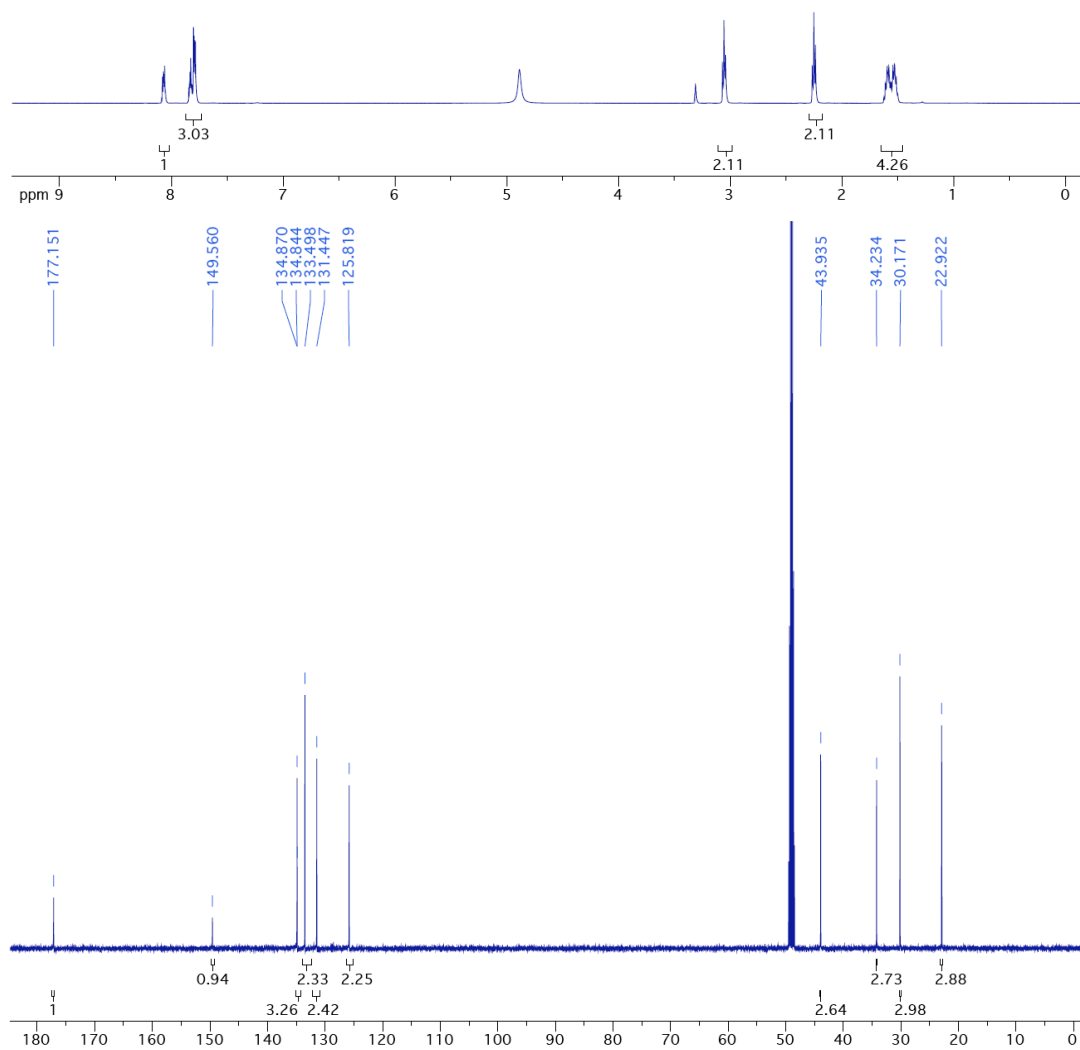



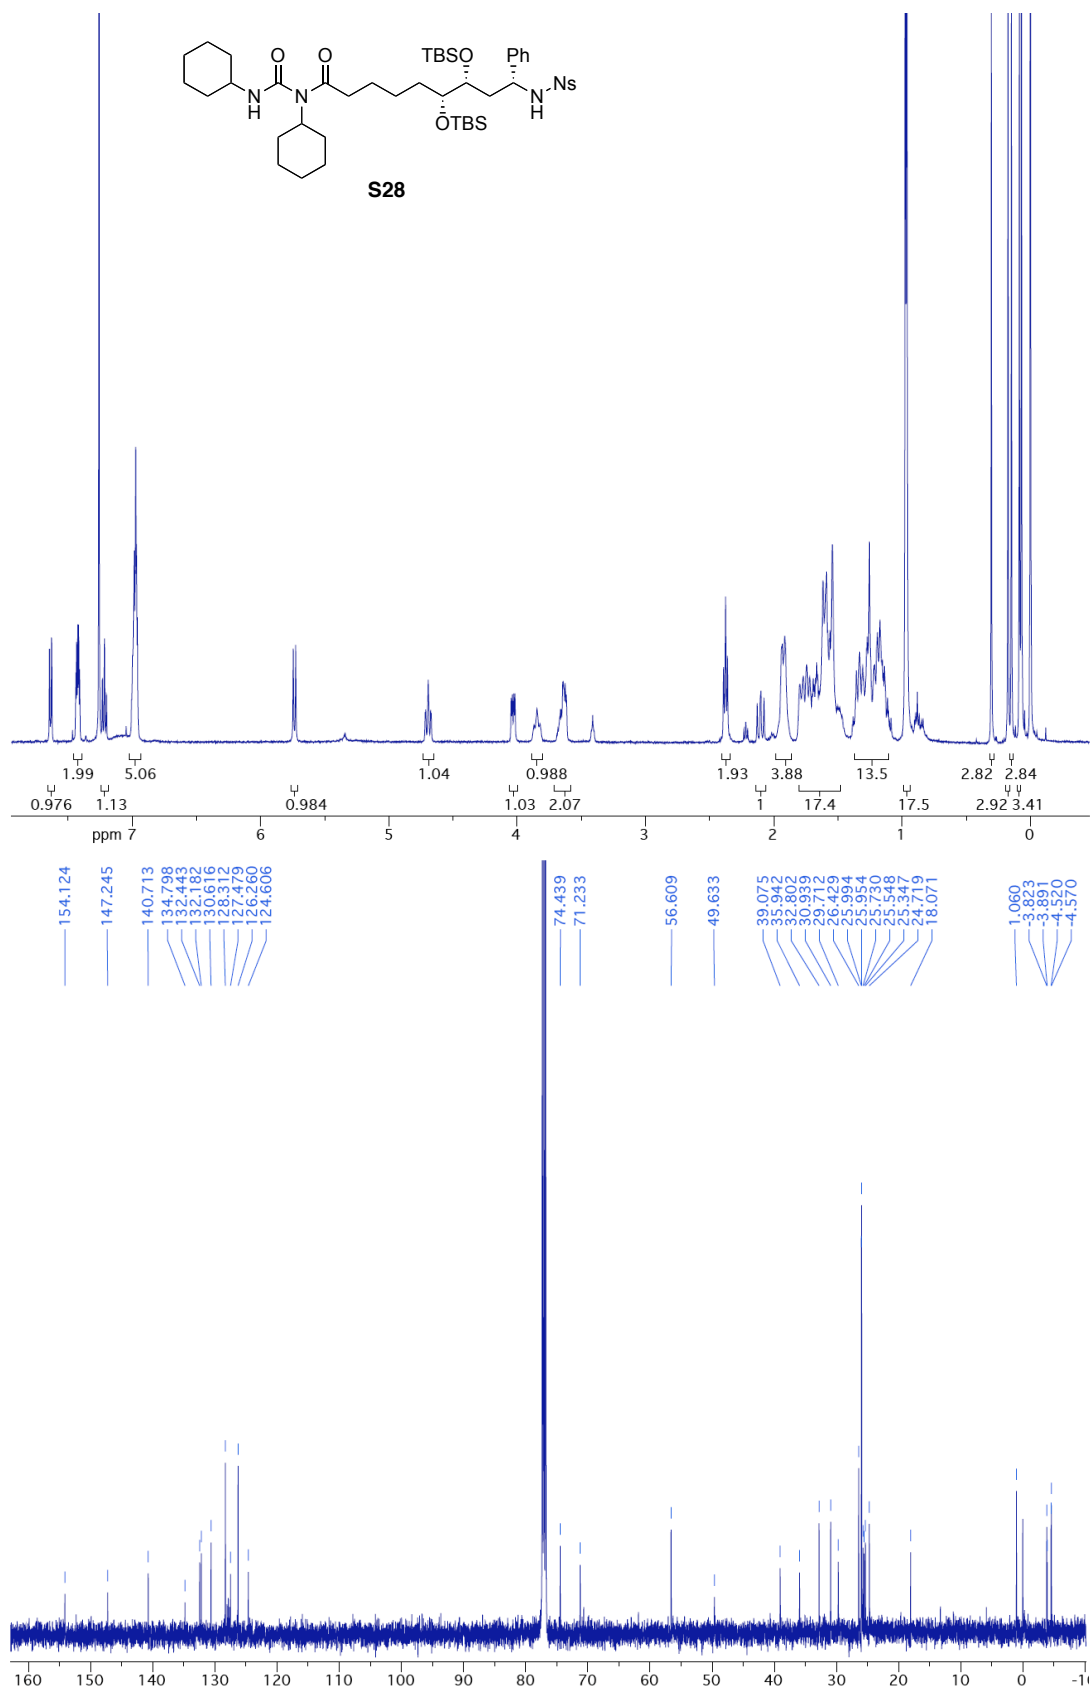

Supplement: NIHMS350798-supplement-1.pdf [file NIHMS350798-supplement-1.pdf]
